# Supplementary material
Source: publisher figshare collection journal article supplement (https://karger.figshare.com/ndownloader/files/28689090)
Supplement: Supplementary file 1 [file 28689090]

## Sheet: Data_S4_transcripts_proteins
Data_S4_Culture BP: all detected transcripts and proteins from the metatranscriptomic and metaproteomic analyses
	Transcriptome							Proteins										IMG annotation IMG_3300036709					Binning
								log2 fold change	Average expression across all samples	logFC divided by its standard error	Raw p-value (based on t) from test that logFC differs from 0	Benjamini-Hochberg false discovery rate adjusted p-value
gene_name	baseMean	log2FoldChange_condition_treatment_heterotrophic_vs_autotrophic	lfcSE_condition_treatment_heterotrophic_vs_autotrophic	stat_condition_treatment_heterotrophic_vs_autotrophic	pvalue_condition_treatment_heterotrophic_vs_autotrophic	padj_condition_treatment_heterotrophic_vs_autotrophic	outcome	logFC	AveExpr	t	P.Value	adj.P.Val	significant	mean_autotrophic	mean_heterotrophic	ngood_autotrophic	ngood_heterotrophic	name	name_source	TaxClass	EC	KO	IMG_contig_ID	NCBI_contig_ID	IMG_MAG_Name	IMG_MAG_ID	Bin_ID
Ga0394449_05241_119503_120171	2380.54	-8.52533	1.53148	-5.56672	2.59581e-08	9.32766e-08	DE	-0.038997	25.7883	-0.112672	0.913664	0.913664	FALSE	25.8078	25.7688	3	3	large subunit ribosomal protein L3	KO:K02906	Bacteria;Proteobacteria;Betaproteobacteria;Burkholderiales;Oxalobacteraceae;Noviherbaspirillum;Noviherbaspirillum denitrificans;Noviherbaspirillum denitrificans TSA40	NA	KO:K02906	Ga0394449_05241	k141_5316	Noviherbaspirillum sp. BP10	2831285802	MEGAHIT-QMFCE002AF.10.fa
Ga0394449_05241_111059_111490	978.933	-7.68286	1.42677	-5.38479	7.25305e-08	2.46848e-07	DE	-0.036363	25.2876	-0.177552	0.864438	0.869791	FALSE	25.3058	25.2695	3	3	large subunit ribosomal protein L15	KO:K02876	Bacteria;Proteobacteria;Betaproteobacteria;Burkholderiales;Oxalobacteraceae;Noviherbaspirillum;Noviherbaspirillum denitrificans;Noviherbaspirillum denitrificans TSA40	NA	KO:K02876	Ga0394449_05241	k141_5316	Noviherbaspirillum sp. BP10	2831285802	MEGAHIT-QMFCE002AF.10.fa
Ga0394449_05241_116268_117104	1609.02	-7.82667	1.51761	-5.15724	2.50612e-07	8.02796e-07	DE	0.0675372	25.8227	0.235979	0.820654	0.83609	FALSE	25.7889	25.8564	3	3	small subunit ribosomal protein S3	KO:K02982	Bacteria;Proteobacteria;Betaproteobacteria;Burkholderiales;Oxalobacteraceae;Noviherbaspirillum;Noviherbaspirillum denitrificans;Noviherbaspirillum denitrificans TSA40	NA	KO:K02982	Ga0394449_05241	k141_5316	Noviherbaspirillum sp. BP10	2831285802	MEGAHIT-QMFCE002AF.10.fa
Ga0394449_14355_13215_13505	399.452	-6.26059	1.48197	-4.22451	2.39462e-05	6.13275e-05	DE	-0.156087	26.9066	-0.397618	0.703545	0.72588	FALSE	26.9847	26.8286	3	3	chaperonin GroES	KO:K04078	Bacteria;Proteobacteria;Betaproteobacteria;Burkholderiales;Oxalobacteraceae;Noviherbaspirillum;Noviherbaspirillum autotrophicum;Noviherbaspirillum autotrophicum TSA66	NA	KO:K04078	Ga0394449_14355	k141_14543	Noviherbaspirillum sp. BP10	2831285802	MEGAHIT-QMFCE002AF.10.fa
Ga0394449_06371_138418_138870	842.122	-9.7717	1.31519	-7.42986	1.08712e-13	7.77167e-13	DE	-0.0890042	26.331	-0.420588	0.687505	0.713863	FALSE	26.3755	26.2865	3	3	large subunit ribosomal protein L9	KO:K02939	Bacteria;Proteobacteria;Betaproteobacteria;Burkholderiales;Oxalobacteraceae;Noviherbaspirillum;Noviherbaspirillum autotrophicum;Noviherbaspirillum autotrophicum TSA66	NA	KO:K02939	Ga0394449_06371	k141_6456	Noviherbaspirillum sp. BP10	2831285802	MEGAHIT-QMFCE002AF.10.fa
Ga0394449_05241_25686_26447	601.704	-7.81335	1.58647	-4.92498	8.43684e-07	2.54434e-06	DE	-0.0600567	25.5347	-0.431368	0.680036	0.708371	FALSE	25.5647	25.5047	3	3	ubiquinol-cytochrome c reductase cytochrome c1 subunit	KO:K00413	Bacteria;Proteobacteria;Betaproteobacteria;Burkholderiales;Oxalobacteraceae;Noviherbaspirillum;Noviherbaspirillum autotrophicum;Noviherbaspirillum autotrophicum TSA66	NA	KO:K00413	Ga0394449_05241	k141_5316	Noviherbaspirillum sp. BP10	2831285802	MEGAHIT-QMFCE002AF.10.fa
Ga0394449_06371_217911_219125	751.674	-9.46393	2.1098	-4.48569	NA	NA	not_DE	0.088866	25.1289	0.438844	0.674879	0.70526	FALSE	25.0845	25.1733	3	3	aromatic-amino-acid transaminase	KO:K00832	Bacteria;Proteobacteria;Betaproteobacteria;Burkholderiales;Oxalobacteraceae;Noviherbaspirillum;Noviherbaspirillum autotrophicum;Noviherbaspirillum autotrophicum TSA66	EC:2.6.1.57	KO:K00832	Ga0394449_06371	k141_6456	Noviherbaspirillum sp. BP10	2831285802	MEGAHIT-QMFCE002AF.10.fa
Ga0394449_05241_114754_115122	2850.8	-7.72899	1.67791	-4.60632	4.09866e-06	1.14026e-05	DE	0.179899	26.785	0.490928	0.639489	0.672602	FALSE	26.695	26.8749	3	3	large subunit ribosomal protein L14	KO:K02874	Bacteria;Proteobacteria;Betaproteobacteria;Burkholderiales;Oxalobacteraceae;Noviherbaspirillum;Noviherbaspirillum autotrophicum;Noviherbaspirillum autotrophicum TSA66	NA	KO:K02874	Ga0394449_05241	k141_5316	Noviherbaspirillum sp. BP10	2831285802	MEGAHIT-QMFCE002AF.10.fa
Ga0394449_05990_145147_145593	161.997	-9.26033	2.27978	-4.06194	4.86672e-05	0.000119775	DE	0.0700089	23.9512	0.226659	0.828801	0.841751	FALSE	23.9092	23.9792	2	3	CBS domain-containing protein	COG0517	Bacteria;Proteobacteria;Betaproteobacteria;Burkholderiales;Oxalobacteraceae;Noviherbaspirillum;Noviherbaspirillum sp. Root189;Noviherbaspirillum sp. Root189	NA	NA	Ga0394449_05990	k141_6075	Noviherbaspirillum sp. BP10	2831285802	MEGAHIT-QMFCE002AF.10.fa
Ga0394449_04570_6912_7178	1583.79	-5.51412	1.75549	-3.14107	0.00168331	0.00323242	DE	0.195138	25.6237	0.544575	0.604075	0.640984	FALSE	25.5261	25.7213	3	3	large subunit ribosomal protein L31	KO:K02909	Bacteria;Proteobacteria;Betaproteobacteria;Burkholderiales;Oxalobacteraceae;Noviherbaspirillum;Noviherbaspirillum autotrophicum;Noviherbaspirillum autotrophicum TSA66	NA	KO:K02909	Ga0394449_04570	k141_4630	Noviherbaspirillum sp. BP10	2831285802	MEGAHIT-QMFCE002AF.10.fa
Ga0394449_04201_133047_134135	168.442	-6.04332	1.61177	-3.74948	0.000177202	0.000401203	DE	0.0804154	24.0632	0.328521	0.757085	0.778647	FALSE	24.023	24.1034	2	2	simple sugar transport system substrate-binding protein	KO:K02058	Bacteria;Proteobacteria;Betaproteobacteria;Burkholderiales;Oxalobacteraceae;Noviherbaspirillum;Noviherbaspirillum sp. Root189;Noviherbaspirillum sp. Root189	NA	KO:K02058	Ga0394449_04201	k141_4256	Noviherbaspirillum sp. BP10	2831285802	MEGAHIT-QMFCE002AF.10.fa
Ga0394449_00595_16116_17075	181.041	-8.18872	1.42361	-5.75207	8.81556e-09	3.34762e-08	DE	0.660358	25.7323	0.554314	0.605483	0.640984	FALSE	25.4021	26.0625	2	2	aspartate carbamoyltransferase catalytic subunit	KO:K00609	Bacteria;Proteobacteria;Betaproteobacteria;Burkholderiales;Oxalobacteraceae;Noviherbaspirillum;Noviherbaspirillum autotrophicum;Noviherbaspirillum autotrophicum TSA66	EC:2.1.3.2	KO:K00609	Ga0394449_00595	k141_604	Noviherbaspirillum sp. BP10	2831285802	MEGAHIT-QMFCE002AF.10.fa
Ga0394449_05241_117114_117443	693.834	-9.34196	2.18162	-4.28213	1.85113e-05	4.79363e-05	DE	0.310117	25.0148	0.864758	0.417704	0.449516	FALSE	24.8597	25.1699	3	3	large subunit ribosomal protein L22	KO:K02890	Bacteria;Proteobacteria;Betaproteobacteria;Burkholderiales;Oxalobacteraceae;Noviherbaspirillum;Noviherbaspirillum autotrophicum;Noviherbaspirillum autotrophicum TSA66	NA	KO:K02890	Ga0394449_05241	k141_5316	Noviherbaspirillum sp. BP10	2831285802	MEGAHIT-QMFCE002AF.10.fa
Ga0394449_05241_106585_107562	1404.41	-6.23877	1.65336	-3.7734	0.000161038	0.000366943	DE	-0.265668	26.8101	-0.86566	0.417244	0.449516	FALSE	26.943	26.6773	3	3	DNA-directed RNA polymerase subunit alpha	KO:K03040	Bacteria;Proteobacteria;Betaproteobacteria;Burkholderiales;Oxalobacteraceae;Noviherbaspirillum;Noviherbaspirillum autotrophicum;Noviherbaspirillum autotrophicum TSA66	EC:2.7.7.6	KO:K03040	Ga0394449_05241	k141_5316	Noviherbaspirillum sp. BP10	2831285802	MEGAHIT-QMFCE002AF.10.fa
Ga0394449_05241_27876_28484	687.797	-7.38295	1.45844	-5.06223	4.1439e-07	1.29115e-06	DE	-0.149223	24.7894	-0.469582	0.660278	0.692227	FALSE	24.9013	24.7521	1	3	ubiquinol-cytochrome c reductase iron-sulfur subunit	KO:K00411	Bacteria;Proteobacteria;Betaproteobacteria;Burkholderiales;Oxalobacteraceae;Noviherbaspirillum;Noviherbaspirillum denitrificans;Noviherbaspirillum denitrificans TSA40	EC:1.10.2.2	KO:K00411	Ga0394449_05241	k141_5316	Noviherbaspirillum sp. BP10	2831285802	MEGAHIT-QMFCE002AF.10.fa
Ga0394449_14355_32168_33952	4881.18	-8.68947	1.62582	-5.34466	9.05894e-08	3.05455e-07	DE	-0.244861	26.8272	-0.946796	0.377341	0.408786	FALSE	26.9496	26.7047	3	3	small subunit ribosomal protein S1	KO:K02945	Bacteria;Proteobacteria;Betaproteobacteria;Burkholderiales;Oxalobacteraceae;Noviherbaspirillum;Noviherbaspirillum massiliense;Noviherbaspirillum massiliense JC206	NA	KO:K02945	Ga0394449_14355	k141_14543	Noviherbaspirillum sp. BP10	2831285802	MEGAHIT-QMFCE002AF.10.fa
Ga0394449_17847_186746_188227	496.952	-7.78356	1.30857	-5.94813	2.71231e-09	1.08217e-08	DE	0.772267	24.3722	0.982285	0.366806	0.398702	FALSE	24.0633	24.8356	3	2	carboxyl-terminal processing protease	KO:K03797	Bacteria;Proteobacteria;Betaproteobacteria;Burkholderiales;Oxalobacteraceae;Noviherbaspirillum;Noviherbaspirillum denitrificans;Noviherbaspirillum denitrificans TSA40	EC:3.4.21.102	KO:K03797	Ga0394449_17847	k141_18081	Noviherbaspirillum sp. BP10	2831285802	MEGAHIT-QMFCE002AF.10.fa
Ga0394449_09390_11613_12533	994.702	-11.1741	1.97425	-5.65994	1.51427e-08	5.59895e-08	DE	0.324733	23.8885	1.00269	0.35769	0.390098	FALSE	23.6936	24.0184	2	3	branched-chain amino acid aminotransferase	KO:K00826	Bacteria;Proteobacteria;Betaproteobacteria;Burkholderiales;Oxalobacteraceae;Noviherbaspirillum;Noviherbaspirillum massiliense;Noviherbaspirillum massiliense JC206	EC:2.6.1.42	KO:K00826	Ga0394449_09390	k141_9504	Noviherbaspirillum sp. BP10	2831285802	MEGAHIT-QMFCE002AF.10.fa
Ga0394449_04201_409874_410623	3205.78	-9.69909	2.35914	-4.11128	3.93477e-05	9.81983e-05	DE	0.715569	27.1882	1.23643	0.25878	0.287042	FALSE	26.8304	27.546	3	3	small subunit ribosomal protein S2	KO:K02967	Bacteria;Proteobacteria;Betaproteobacteria;Burkholderiales;Oxalobacteraceae;Noviherbaspirillum;Noviherbaspirillum autotrophicum;Noviherbaspirillum autotrophicum TSA66	NA	KO:K02967	Ga0394449_04201	k141_4256	Noviherbaspirillum sp. BP10	2831285802	MEGAHIT-QMFCE002AF.10.fa
Ga0394449_04201_359315_361027	1573.53	-5.04847	1.07134	-4.71227	2.44972e-06	6.99238e-06	DE	0.33673	26.0206	1.25552	0.252211	0.280714	FALSE	25.8522	26.189	3	3	hypothetical protein	Hypo-rule applied	Bacteria;Proteobacteria;Betaproteobacteria;Burkholderiales;Oxalobacteraceae;Noviherbaspirillum;Noviherbaspirillum denitrificans;Noviherbaspirillum denitrificans TSA40	NA	NA	Ga0394449_04201	k141_4256	Noviherbaspirillum sp. BP10	2831285802	MEGAHIT-QMFCE002AF.10.fa
Ga0394449_02985_468413_469585	283.893	-7.59391	1.32045	-5.751	8.87197e-09	3.36792e-08	DE	0.396946	23.9736	1.20026	0.278732	0.307078	FALSE	23.7354	24.1323	2	3	branched-chain amino acid transport system substrate-binding protein	KO:K01999	Bacteria;Proteobacteria;Betaproteobacteria;Burkholderiales;Oxalobacteraceae;Noviherbaspirillum;Noviherbaspirillum autotrophicum;Noviherbaspirillum autotrophicum TSA66	NA	KO:K01999	Ga0394449_02985	k141_3026	Noviherbaspirillum sp. BP10	2831285802	MEGAHIT-QMFCE002AF.10.fa
Ga0394449_10774_185297_186640	214.208	-6.57569	1.43174	-4.59279	4.37357e-06	1.21268e-05	DE	0.26217	25.4608	1.24417	0.263384	0.291155	FALSE	25.3035	25.5657	2	3	glutamate dehydrogenase (NADP+)	KO:K00262	Bacteria;Proteobacteria;Betaproteobacteria;Burkholderiales;Oxalobacteraceae;Massilia;Massilia umbonata;Massilia umbonata CECT 7753	EC:1.4.1.4	KO:K00262	Ga0394449_10774	k141_10911	Noviherbaspirillum sp. BP10	2831285802	MEGAHIT-QMFCE002AF.10.fa
Ga0394449_06371_138898_139182	710.935	-2.34177	2.36575	-0.989865	NA	NA	not_DE	-0.209433	25.3149	-1.05918	0.342452	0.374737	FALSE	25.4719	25.2625	1	3	small subunit ribosomal protein S18	KO:K02963	Bacteria;Proteobacteria;Betaproteobacteria;Burkholderiales;Oxalobacteraceae;Herbaspirillum;Herbaspirillum sp. CF444;Herbaspirillum sp. CF444	NA	KO:K02963	Ga0394449_06371	k141_6456	Noviherbaspirillum sp. BP10	2831285802	MEGAHIT-QMFCE002AF.10.fa
Ga0394449_03860_278006_279109	507.198	-8.18473	2.20383	-3.71386	NA	NA	not_DE	-0.272899	24.698	-1.29886	0.24532	0.273983	FALSE	24.8617	24.5888	2	3	DNA polymerase-3 subunit beta	KO:K02338	Bacteria;Proteobacteria;Betaproteobacteria;Burkholderiales;Oxalobacteraceae;Noviherbaspirillum;Noviherbaspirillum autotrophicum;Noviherbaspirillum autotrophicum TSA66	EC:2.7.7.7	KO:K02338	Ga0394449_03860	k141_3911	Noviherbaspirillum sp. BP10	2831285802	MEGAHIT-QMFCE002AF.10.fa
Ga0394449_13391_26314_28308	1030.31	-7.07858	1.50594	-4.70043	2.59613e-06	7.38205e-06	DE	-0.324405	24.4773	-1.45822	0.190987	0.217792	FALSE	24.6395	24.3151	3	3	transketolase	KO:K00615	Bacteria;Proteobacteria;Betaproteobacteria;Burkholderiales;Oxalobacteraceae;Noviherbaspirillum;Noviherbaspirillum denitrificans;Noviherbaspirillum denitrificans TSA40	EC:2.2.1.1	KO:K00615	Ga0394449_13391	k141_13568	Noviherbaspirillum sp. BP10	2831285802	MEGAHIT-QMFCE002AF.10.fa
Ga0394449_02985_12470_14008	626.208	-6.49829	1.74923	-3.71495	0.000203241	0.000455873	DE	-0.50176	24.3213	-1.36786	0.224127	0.253803	FALSE	24.6223	24.1206	2	3	fumarate hydratase class I	KO:K01676	Bacteria;Proteobacteria;Betaproteobacteria;Burkholderiales;Oxalobacteraceae;Noviherbaspirillum;Noviherbaspirillum autotrophicum;Noviherbaspirillum autotrophicum TSA66	EC:4.2.1.2	KO:K01676	Ga0394449_02985	k141_3026	Noviherbaspirillum sp. BP10	2831285802	MEGAHIT-QMFCE002AF.10.fa
Ga0394449_10774_125552_126904	99.7967	-7.55652	2.82491	-2.67496	0.00747388	0.0129724	DE	-0.408966	25.1496	-1.5143	0.176603	0.202099	FALSE	25.3541	24.9452	3	3	tryptophan synthase beta chain	KO:K06001	Bacteria;Proteobacteria;Betaproteobacteria;Burkholderiales;Oxalobacteraceae;Noviherbaspirillum;Noviherbaspirillum autotrophicum;Noviherbaspirillum autotrophicum TSA66	EC:4.2.1.20	KO:K06001	Ga0394449_10774	k141_10911	Noviherbaspirillum sp. BP10	2831285802	MEGAHIT-QMFCE002AF.10.fa
Ga0394449_00731_50858_52435	246.264	-8.432	2.12759	-3.96317	7.39607e-05	0.000177777	DE	-0.380415	24.673	-1.5846	0.159988	0.183732	FALSE	24.8632	24.4828	3	3	phosphoribosylaminoimidazolecarboxamide formyltransferase/IMP cyclohydrolase	KO:K00602	Bacteria;Proteobacteria;Betaproteobacteria;Burkholderiales;Oxalobacteraceae;Noviherbaspirillum;Noviherbaspirillum autotrophicum;Noviherbaspirillum autotrophicum TSA66	EC:2.1.2.3,EC:3.5.4.10	KO:K00602	Ga0394449_00731	k141_740	Noviherbaspirillum sp. BP10	2831285802	MEGAHIT-QMFCE002AF.10.fa
Ga0394449_09390_66480_67958	91.0788	-10.6419	1.70024	-6.25907	3.87284e-10	1.6966e-09	DE	-0.348881	24.7371	-1.39644	0.226843	0.255986	FALSE	24.8244	24.4755	3	1	succinate-semialdehyde dehydrogenase/glutarate-semialdehyde dehydrogenase	KO:K00135	Bacteria;Proteobacteria;Betaproteobacteria;Burkholderiales;Oxalobacteraceae;Noviherbaspirillum;Noviherbaspirillum autotrophicum;Noviherbaspirillum autotrophicum TSA66	EC:1.2.1.16,EC:1.2.1.20,EC:1.2.1.79	KO:K00135	Ga0394449_09390	k141_9504	Noviherbaspirillum sp. BP10	2831285802	MEGAHIT-QMFCE002AF.10.fa
Ga0394449_10774_127019_128305	105.248	-6.52861	1.40483	-4.64724	3.36401e-06	9.46282e-06	DE	-0.56481	25.8893	-1.69321	0.137173	0.15979	FALSE	26.1717	25.6069	3	3	O-acetylhomoserine (thiol)-lyase	KO:K01740	Bacteria;Proteobacteria;Betaproteobacteria;Burkholderiales;Oxalobacteraceae;Noviherbaspirillum;Noviherbaspirillum autotrophicum;Noviherbaspirillum autotrophicum TSA66	EC:2.5.1.49	KO:K01740	Ga0394449_10774	k141_10911	Noviherbaspirillum sp. BP10	2831285802	MEGAHIT-QMFCE002AF.10.fa
Ga0394449_17847_135679_136722	413.864	-6.44302	1.70701	-3.77444	0.000160368	0.000365582	DE	-0.518827	24.0729	-1.7265	0.130823	0.154048	FALSE	24.3323	23.8135	3	3	rod shape-determining protein MreB	KO:K03569	Bacteria;Proteobacteria;Betaproteobacteria;Burkholderiales;Oxalobacteraceae;Noviherbaspirillum;Noviherbaspirillum sp. Root189;Noviherbaspirillum sp. Root189	NA	KO:K03569	Ga0394449_17847	k141_18081	Noviherbaspirillum sp. BP10	2831285802	MEGAHIT-QMFCE002AF.10.fa
Ga0394449_05241_113884_114423	3120.58	-8.0077	1.62429	-4.92995	8.22487e-07	2.48393e-06	DE	0.448443	26.4066	1.72913	0.130334	0.154031	FALSE	26.1824	26.6308	3	3	large subunit ribosomal protein L5	KO:K02931	Bacteria;Proteobacteria;Betaproteobacteria;Burkholderiales;Oxalobacteraceae;Noviherbaspirillum;Noviherbaspirillum denitrificans;Noviherbaspirillum denitrificans TSA40	NA	KO:K02931	Ga0394449_05241	k141_5316	Noviherbaspirillum sp. BP10	2831285802	MEGAHIT-QMFCE002AF.10.fa
Ga0394449_08617_73039_74352	1576.86	-7.40095	1.58651	-4.66492	3.08741e-06	8.72023e-06	DE	0.321317	27.0208	1.8305	0.11276	0.133748	FALSE	26.8601	27.1815	3	3	citrate synthase	KO:K01647	Bacteria;Proteobacteria;Betaproteobacteria;Burkholderiales;Oxalobacteraceae;Noviherbaspirillum;Noviherbaspirillum autotrophicum;Noviherbaspirillum autotrophicum TSA66	EC:2.3.3.1	KO:K01647	Ga0394449_08617	k141_8724	Noviherbaspirillum sp. BP10	2831285802	MEGAHIT-QMFCE002AF.10.fa
Ga0394449_08617_133476_135197	321.129	-7.15491	2.33077	-3.06976	0.00214232	0.00405441	DE	-0.356106	24.7247	-1.70348	0.154947	0.178644	FALSE	24.9027	24.5466	2	2	methyl-accepting chemotaxis protein-1 (serine sensor receptor)	KO:K05874	Bacteria;Proteobacteria;Betaproteobacteria;Burkholderiales;Oxalobacteraceae;Noviherbaspirillum;Noviherbaspirillum denitrificans;Noviherbaspirillum denitrificans TSA40	NA	KO:K05874	Ga0394449_08617	k141_8724	Noviherbaspirillum sp. BP10	2831285802	MEGAHIT-QMFCE002AF.10.fa
Ga0394449_10774_120269_120790	418.211	-4.16085	1.75608	-2.3694	0.017817	0.0279642	DE	-0.474792	25.8697	-1.87207	0.106238	0.126474	FALSE	26.1071	25.6323	3	3	hypothetical protein	Hypo-rule applied	Bacteria;Proteobacteria;Deltaproteobacteria;Desulfovibrionales;Desulfomicrobiaceae;Desulfomicrobium;Desulfomicrobium escambiense;Desulfomicrobium escambiense DSM 10707	NA	NA	Ga0394449_10774	k141_10911	Noviherbaspirillum sp. BP10	2831285802	MEGAHIT-QMFCE002AF.10.fa
Ga0394449_04201_407886_408602	771.63	-7.61439	2.37754	-3.20263	0.0013618	0.00265047	DE	-0.397214	24.0819	-1.83462	0.131739	0.154567	FALSE	24.2805	23.8833	2	2	uridylate kinase	KO:K09903	Bacteria;Proteobacteria;Betaproteobacteria;Burkholderiales;Oxalobacteraceae;Noviherbaspirillum;Noviherbaspirillum sp. Root189;Noviherbaspirillum sp. Root189	EC:2.7.4.22	KO:K09903	Ga0394449_04201	k141_4256	Noviherbaspirillum sp. BP10	2831285802	MEGAHIT-QMFCE002AF.10.fa
Ga0394449_05990_5609_7126	164.513	-7.17213	1.50962	-4.75095	2.02459e-06	5.83466e-06	DE	-0.351742	23.3992	-1.9294	0.105829	0.12645	FALSE	23.6103	23.2585	2	3	leucyl aminopeptidase	KO:K01255	Bacteria;Proteobacteria;Betaproteobacteria;Burkholderiales;Oxalobacteraceae;Noviherbaspirillum;Noviherbaspirillum sp. Root189;Noviherbaspirillum sp. Root189	EC:3.4.11.1	KO:K01255	Ga0394449_05990	k141_6075	Noviherbaspirillum sp. BP10	2831285802	MEGAHIT-QMFCE002AF.10.fa
Ga0394449_02985_276900_277286	247.407	-5.89987	1.47445	-4.0014	6.29694e-05	0.000152685	DE	-0.749263	26.3902	-2.01605	0.0863958	0.104382	FALSE	26.7648	26.0155	3	3	large subunit ribosomal protein L19	KO:K02884	Bacteria;Proteobacteria;Betaproteobacteria;Burkholderiales;Oxalobacteraceae;Noviherbaspirillum;Noviherbaspirillum sp. Root189;Noviherbaspirillum sp. Root189	NA	KO:K02884	Ga0394449_02985	k141_3026	Noviherbaspirillum sp. BP10	2831285802	MEGAHIT-QMFCE002AF.10.fa
Ga0394449_02985_147659_148912	2151.35	-7.71805	1.71156	-4.50936	6.50248e-06	1.76817e-05	DE	1.21426	25.6926	2.22839	0.0636928	0.0784096	FALSE	25.0855	26.2998	3	3	isocitrate dehydrogenase	KO:K00031	Bacteria;Proteobacteria;Betaproteobacteria;Burkholderiales;Oxalobacteraceae;Noviherbaspirillum;Noviherbaspirillum denitrificans;Noviherbaspirillum denitrificans TSA40	EC:1.1.1.42	KO:K00031	Ga0394449_02985	k141_3026	Noviherbaspirillum sp. BP10	2831285802	MEGAHIT-QMFCE002AF.10.fa
Ga0394449_04201_259978_260826	821.967	-11.4017	1.95396	-5.83517	5.3737e-09	2.08552e-08	DE	-0.933067	24.8251	-2.27882	0.059255	0.073785	FALSE	25.2916	24.3586	3	3	nucleotide-binding universal stress UspA family protein	COG0589	Bacteria;Proteobacteria;Betaproteobacteria;Burkholderiales;Oxalobacteraceae;Noviherbaspirillum;Noviherbaspirillum denitrificans;Noviherbaspirillum denitrificans TSA40	NA	NA	Ga0394449_04201	k141_4256	Noviherbaspirillum sp. BP10	2831285802	MEGAHIT-QMFCE002AF.10.fa
Ga0394449_04570_8758_9084	329.195	-6.1253	2.42027	-2.53083	0.0113792	0.0189429	DE	-0.476967	23.3907	-2.24034	0.0698826	0.084829	FALSE	23.6769	23.2	2	3	thioredoxin 1	KO:K03671	Bacteria;Proteobacteria;Betaproteobacteria;Burkholderiales;Oxalobacteraceae;Noviherbaspirillum;Noviherbaspirillum autotrophicum;Noviherbaspirillum autotrophicum TSA66	NA	KO:K03671	Ga0394449_04570	k141_4630	Noviherbaspirillum sp. BP10	2831285802	MEGAHIT-QMFCE002AF.10.fa
Ga0394449_00595_6183_7226	569.896	-10.2801	2.02561	-5.07507	3.87359e-07	1.21148e-06	DE	-0.711474	23.5812	-2.11913	0.093054	0.112009	FALSE	24.1148	23.4033	1	3	GDPmannose 4,6-dehydratase	KO:K01711	Bacteria;Proteobacteria;Betaproteobacteria;Burkholderiales;Oxalobacteraceae;Noviherbaspirillum;Noviherbaspirillum sp. Root189;Noviherbaspirillum sp. Root189	EC:4.2.1.47	KO:K01711	Ga0394449_00595	k141_604	Noviherbaspirillum sp. BP10	2831285802	MEGAHIT-QMFCE002AF.10.fa
Ga0394449_06371_117351_118661	302.368	-6.08346	2.17424	-2.79797	0.00514254	0.00925062	DE	-0.579902	23.768	-2.31184	0.0635849	0.0784096	FALSE	24.116	23.5361	2	3	homoserine dehydrogenase	KO:K00003	Bacteria;Proteobacteria;Betaproteobacteria;Burkholderiales;Oxalobacteraceae;Noviherbaspirillum;Noviherbaspirillum sp. Root189;Noviherbaspirillum sp. Root189	EC:1.1.1.3	KO:K00003	Ga0394449_06371	k141_6456	Noviherbaspirillum sp. BP10	2831285802	MEGAHIT-QMFCE002AF.10.fa
Ga0394449_08617_95085_95510	576.633	-3.27101	1.57756	-2.07346	0.0381297	0.0532325	not_DE	-1.11275	26.4894	-2.40922	0.0491936	0.0617294	FALSE	27.0458	25.933	3	3	nucleoside-diphosphate kinase	KO:K00940	Bacteria;Proteobacteria;Betaproteobacteria;Burkholderiales;Oxalobacteraceae;Noviherbaspirillum;Noviherbaspirillum massiliense;Noviherbaspirillum massiliense JC206	EC:2.7.4.6	KO:K00940	Ga0394449_08617	k141_8724	Noviherbaspirillum sp. BP10	2831285802	MEGAHIT-QMFCE002AF.10.fa
Ga0394449_03860_6170_6703	432.811	-8.5709	2.13308	-4.01808	5.86736e-05	0.000142872	DE	-0.793631	25.69	-2.4749	0.0448118	0.056449	FALSE	26.0868	25.2932	3	3	F-type H+-transporting ATPase subunit delta	KO:K02113	Bacteria;Proteobacteria;Betaproteobacteria;Burkholderiales;Oxalobacteraceae;Noviherbaspirillum;Noviherbaspirillum sp. Root189;Noviherbaspirillum sp. Root189	NA	KO:K02113	Ga0394449_03860	k141_3911	Noviherbaspirillum sp. BP10	2831285802	MEGAHIT-QMFCE002AF.10.fa
Ga0394449_05990_52304_53392	209.697	-8.39086	2.12973	-3.93987	NA	NA	not_DE	-0.776809	24.7412	-2.48383	0.0442477	0.0559553	FALSE	25.1297	24.3528	3	3	ATP-binding protein involved in chromosome partitioning	KO:K03593	Bacteria;Proteobacteria;Betaproteobacteria;Burkholderiales;Oxalobacteraceae;Noviherbaspirillum;Noviherbaspirillum autotrophicum;Noviherbaspirillum autotrophicum TSA66	NA	KO:K03593	Ga0394449_05990	k141_6075	Noviherbaspirillum sp. BP10	2831285802	MEGAHIT-QMFCE002AF.10.fa
Ga0394449_08617_117387_117875	514.868	-7.04514	1.72474	-4.08476	4.41233e-05	0.000109277	DE	-0.982303	25.0745	-2.5427	0.040712	0.0519816	FALSE	25.5657	24.5834	3	3	peptidyl-prolyl cis-trans isomerase B (cyclophilin B)	KO:K03768	Bacteria;Proteobacteria;Betaproteobacteria;Burkholderiales;Oxalobacteraceae;Noviherbaspirillum;Noviherbaspirillum massiliense;Noviherbaspirillum massiliense JC206	EC:5.2.1.8	KO:K03768	Ga0394449_08617	k141_8724	Noviherbaspirillum sp. BP10	2831285802	MEGAHIT-QMFCE002AF.10.fa
Ga0394449_11448_35_430	27.8033	-6.14024	3.6069	-1.70236	NA	NA	not_DE	-0.621648	26.7638	-2.57379	0.0389648	0.0500535	FALSE	27.0747	26.453	3	3	glyceraldehyde 3-phosphate dehydrogenase	KO:K00134	Bacteria;Proteobacteria;Betaproteobacteria;Burkholderiales;Oxalobacteraceae;Noviherbaspirillum;Noviherbaspirillum massiliense;Noviherbaspirillum massiliense JC206	EC:1.2.1.12	KO:K00134	Ga0394449_11448	k141_11594	Noviherbaspirillum sp. BP10	2831285802	MEGAHIT-QMFCE002AF.10.fa
Ga0394449_21312_139920_142145	322.25	-9.40127	2.16867	-4.33503	1.45738e-05	3.81832e-05	DE	0.607327	25.1622	2.59478	0.0378299	0.0487886	TRUE	24.8585	25.4658	3	3	malate synthase	KO:K01638	Bacteria;Proteobacteria;Betaproteobacteria;Burkholderiales;Oxalobacteraceae;Noviherbaspirillum;Noviherbaspirillum autotrophicum;Noviherbaspirillum autotrophicum TSA66	EC:2.3.3.9	KO:K01638	Ga0394449_21312	k141_21589	Noviherbaspirillum sp. BP10	2831285802	MEGAHIT-QMFCE002AF.10.fa
Ga0394449_08617_78833_80260	508.31	-7.12781	2.48027	-2.8738	NA	NA	not_DE	0.520227	25.8193	2.71217	0.0320909	0.0418857	TRUE	25.5591	26.0794	3	3	dihydrolipoamide dehydrogenase	KO:K00382	Bacteria;Proteobacteria;Betaproteobacteria;Burkholderiales;Oxalobacteraceae;Noviherbaspirillum;Noviherbaspirillum denitrificans;Noviherbaspirillum denitrificans TSA40	EC:1.8.1.4	KO:K00382	Ga0394449_08617	k141_8724	Noviherbaspirillum sp. BP10	2831285802	MEGAHIT-QMFCE002AF.10.fa
Ga0394449_08617_67106_68080	1610.4	-4.66582	1.00818	-4.62795	3.69306e-06	1.03262e-05	DE	0.859624	26.9322	2.82642	0.0273813	0.036471	TRUE	26.5024	27.362	3	3	malate dehydrogenase	KO:K00024	Bacteria;Proteobacteria;Betaproteobacteria;Burkholderiales;Oxalobacteraceae;Noviherbaspirillum;Noviherbaspirillum humi;Noviherbaspirillum humi U15	EC:1.1.1.37	KO:K00024	Ga0394449_08617	k141_8724	Noviherbaspirillum sp. BP10	2831285802	MEGAHIT-QMFCE002AF.10.fa
Ga0394449_17847_98303_99745	835.594	-7.09314	1.48014	-4.79221	1.64958e-06	4.7993e-06	DE	-0.849963	24.0984	-3.1026	0.0303585	0.0399455	TRUE	24.5234	23.6735	2	2	DNA-binding NtrC family response regulator	COG2204	Bacteria;Proteobacteria;Betaproteobacteria;Burkholderiales;Oxalobacteraceae;Noviherbaspirillum;Noviherbaspirillum denitrificans;Noviherbaspirillum denitrificans TSA40	NA	NA	Ga0394449_17847	k141_18081	Noviherbaspirillum sp. BP10	2831285802	MEGAHIT-QMFCE002AF.10.fa
Ga0394449_10774_202060_202911	194.332	-8.44683	2.2168	-3.81037	0.000138758	0.000318998	DE	-0.857115	25.2388	-3.07812	0.0194101	0.0262845	TRUE	25.6673	24.8102	3	3	cytochrome c5	COG3245	Bacteria;Proteobacteria;Betaproteobacteria;Burkholderiales;Oxalobacteraceae;Noviherbaspirillum;Noviherbaspirillum autotrophicum;Noviherbaspirillum autotrophicum TSA66	NA	NA	Ga0394449_10774	k141_10911	Noviherbaspirillum sp. BP10	2831285802	MEGAHIT-QMFCE002AF.10.fa
Ga0394449_15335_50925_52061	69.7572	-11.8471	1.90829	-6.20821	5.359e-10	2.30837e-09	DE	-1.23411	24.958	-3.09777	0.0305148	0.0399891	TRUE	25.2666	24.0325	3	1	RND family efflux transporter MFP subunit	TIGR01730	Bacteria;Proteobacteria;Deltaproteobacteria;Desulfuromonadales;Desulfuromonadaceae;Pelobacter;Pelobacter propionicus;Pelobacter propionicus DSM 2379	NA	NA	Ga0394449_15335	k141_15535	Noviherbaspirillum sp. BP10	2831285802	MEGAHIT-QMFCE002AF.10.fa
Ga0394449_03860_15577_16776	311.697	-9.01397	1.48227	-6.08118	1.19304e-09	4.94638e-09	DE	-1.1979	24.6917	-3.13219	0.0294214	0.0390284	TRUE	24.9912	23.7933	3	1	alcohol dehydrogenase	KO:K00001	Bacteria;Proteobacteria;Betaproteobacteria;Burkholderiales;Oxalobacteraceae;Noviherbaspirillum;Noviherbaspirillum sp. Root189;Noviherbaspirillum sp. Root189	EC:1.1.1.1	KO:K00001	Ga0394449_03860	k141_3911	Noviherbaspirillum sp. BP10	2831285802	MEGAHIT-QMFCE002AF.10.fa
Ga0394449_05990_226356_226847	359.989	-8.67411	2.07588	-4.17853	NA	NA	not_DE	0.612312	25.1571	3.21703	0.0161112	0.0222814	TRUE	24.8509	25.4632	3	3	acetolactate synthase-1/3 small subunit	KO:K01653	Bacteria;Proteobacteria;Betaproteobacteria;Burkholderiales;Oxalobacteraceae;Noviherbaspirillum;Noviherbaspirillum sp. Root189;Noviherbaspirillum sp. Root189	EC:2.2.1.6	KO:K01653	Ga0394449_05990	k141_6075	Noviherbaspirillum sp. BP10	2831285802	MEGAHIT-QMFCE002AF.10.fa
Ga0394449_14355_25809_26132	1825.84	-7.39937	1.61978	-4.56814	4.92071e-06	1.35608e-05	DE	-1.30536	25.1817	-3.22116	0.0160228	0.022254	TRUE	25.8344	24.529	3	3	hypothetical protein	Hypo-rule applied	Bacteria;Proteobacteria;Betaproteobacteria;Burkholderiales;Oxalobacteraceae;Noviherbaspirillum;Noviherbaspirillum autotrophicum;Noviherbaspirillum autotrophicum TSA66	NA	NA	Ga0394449_14355	k141_14543	Noviherbaspirillum sp. BP10	2831285802	MEGAHIT-QMFCE002AF.10.fa
Ga0394449_04201_425750_426577	144.768	-10.5013	1.52866	-6.86957	6.43937e-12	3.58025e-11	DE	-0.848439	25.4575	-3.37714	0.0130419	0.0184288	TRUE	25.8817	25.0333	3	3	2,3,4,5-tetrahydropyridine-2-carboxylate N-succinyltransferase	KO:K00674	Bacteria;Proteobacteria;Betaproteobacteria;Burkholderiales;Oxalobacteraceae;Noviherbaspirillum;Noviherbaspirillum autotrophicum;Noviherbaspirillum autotrophicum TSA66	EC:2.3.1.117	KO:K00674	Ga0394449_04201	k141_4256	Noviherbaspirillum sp. BP10	2831285802	MEGAHIT-QMFCE002AF.10.fa
Ga0394449_17847_191341_191841	285.168	-9.74595	1.98742	-4.90383	9.39867e-07	2.81823e-06	DE	-1.81933	25.5021	-3.56115	0.0102772	0.0148449	TRUE	26.4118	24.5925	3	3	preprotein translocase subunit SecB	KO:K03071	Bacteria;Proteobacteria;Betaproteobacteria;Burkholderiales;Oxalobacteraceae;Noviherbaspirillum;Noviherbaspirillum sp. Root189;Noviherbaspirillum sp. Root189	NA	KO:K03071	Ga0394449_17847	k141_18081	Noviherbaspirillum sp. BP10	2831285802	MEGAHIT-QMFCE002AF.10.fa
Ga0394449_08617_15827_16894	644.364	-7.10054	1.57242	-4.51569	6.31121e-06	1.72086e-05	DE	-0.561961	24.6448	-3.57188	0.0101371	0.0147078	TRUE	24.9258	24.3638	3	3	NADH-quinone oxidoreductase subunit H	KO:K00337	Bacteria;Proteobacteria;Betaproteobacteria;Burkholderiales;Oxalobacteraceae;Noviherbaspirillum;Noviherbaspirillum sp. Root189;Noviherbaspirillum sp. Root189	EC:1.6.5.3	KO:K00337	Ga0394449_08617	k141_8724	Noviherbaspirillum sp. BP10	2831285802	MEGAHIT-QMFCE002AF.10.fa
Ga0394449_08617_70064_71875	861.887	-6.55902	1.6799	-3.90442	9.44521e-05	0.000223365	DE	0.867398	25.8828	3.62227	0.00950588	0.0139163	TRUE	25.4491	26.3165	3	3	succinate dehydrogenase / fumarate reductase flavoprotein subunit	KO:K00239	Bacteria;Proteobacteria;Betaproteobacteria;Burkholderiales;Oxalobacteraceae;Noviherbaspirillum;Noviherbaspirillum sp. Root189;Noviherbaspirillum sp. Root189	EC:1.3.5.1,EC:1.3.5.4	KO:K00239	Ga0394449_08617	k141_8724	Noviherbaspirillum sp. BP10	2831285802	MEGAHIT-QMFCE002AF.10.fa
Ga0394449_17847_222228_223397	702.713	-6.63851	1.9615	-3.3844	0.000713344	0.00145534	DE	-1.45668	25.3121	-3.63719	0.00932738	0.0137791	TRUE	26.0405	24.5838	3	3	S-adenosylmethionine synthetase	KO:K00789	Bacteria;Proteobacteria;Betaproteobacteria;Burkholderiales;Oxalobacteraceae;Noviherbaspirillum;Noviherbaspirillum humi;Noviherbaspirillum humi U15	EC:2.5.1.6	KO:K00789	Ga0394449_17847	k141_18081	Noviherbaspirillum sp. BP10	2831285802	MEGAHIT-QMFCE002AF.10.fa
Ga0394449_04201_391107_393533	1948.44	-9.11896	1.6165	-5.64116	1.68911e-08	6.20515e-08	DE	-1.35159	25.8193	-3.69167	0.00870604	0.013039	TRUE	26.4951	25.1435	3	3	pyruvate,water dikinase	KO:K01007	Bacteria;Proteobacteria;Betaproteobacteria;Burkholderiales;Oxalobacteraceae;Noviherbaspirillum;Noviherbaspirillum denitrificans;Noviherbaspirillum denitrificans TSA40	EC:2.7.9.2	KO:K01007	Ga0394449_04201	k141_4256	Noviherbaspirillum sp. BP10	2831285802	MEGAHIT-QMFCE002AF.10.fa
Ga0394449_04201_275088_278819	8603.6	-6.81213	1.90875	-3.56889	0.000358496	0.000769111	DE	0.851053	26.7568	3.76885	0.0107406	0.0153776	TRUE	26.2461	27.0972	2	3	nitrate reductase alpha subunit	KO:K00370	Bacteria;Proteobacteria;Betaproteobacteria;Burkholderiales;Oxalobacteraceae;Noviherbaspirillum;Noviherbaspirillum denitrificans;Noviherbaspirillum denitrificans TSA40	EC:1.7.99.4	KO:K00370	Ga0394449_04201	k141_4256	Noviherbaspirillum sp. BP10	2831285802	MEGAHIT-QMFCE002AF.10.fa
Ga0394449_15335_47422_50007	341.64	-7.50666	1.56709	-4.7902	1.66611e-06	4.84362e-06	DE	0.891562	25.366	3.7701	0.0107258	0.0153776	TRUE	24.8311	25.7226	2	3	aconitate hydratase 2/2-methylisocitrate dehydratase	KO:K01682	Bacteria;Proteobacteria;Betaproteobacteria;Burkholderiales;Oxalobacteraceae;Noviherbaspirillum;Noviherbaspirillum autotrophicum;Noviherbaspirillum autotrophicum TSA66	EC:4.2.1.3,EC:4.2.1.99	KO:K01682	Ga0394449_15335	k141_15535	Noviherbaspirillum sp. BP10	2831285802	MEGAHIT-QMFCE002AF.10.fa
Ga0394449_06371_154386_155264	236.731	-7.82622	1.60767	-4.86804	1.12708e-06	3.34763e-06	DE	-0.961965	24.6227	-3.75846	0.00800536	0.0122148	TRUE	25.1036	24.1417	3	3	4-hydroxy-tetrahydrodipicolinate synthase	KO:K01714	Bacteria;Proteobacteria;Betaproteobacteria;Burkholderiales;Oxalobacteraceae;Noviherbaspirillum;Noviherbaspirillum denitrificans;Noviherbaspirillum denitrificans TSA40	EC:4.3.3.7	KO:K01714	Ga0394449_06371	k141_6456	Noviherbaspirillum sp. BP10	2831285802	MEGAHIT-QMFCE002AF.10.fa
Ga0394449_10774_161721_162920	35.4316	-10.848	1.97092	-5.50404	3.71185e-08	1.31171e-07	DE	0.961881	27.8177	3.76707	0.00791962	0.0121409	TRUE	27.3368	28.2986	3	3	hypothetical protein	Hypo-rule applied	Bacteria;Proteobacteria;Betaproteobacteria;Burkholderiales;Oxalobacteraceae;unclassified Oxalobacteraceae;Oxalobacteraceae bacterium IMCC9480;beta proteobacterium sp. IMCC9480	NA	NA	Ga0394449_10774	k141_10911	Noviherbaspirillum sp. BP10	2831285802	MEGAHIT-QMFCE002AF.10.fa
Ga0394449_05241_107662_108324	1008.02	-8.6567	2.27733	-3.80126	0.000143963	0.000330355	DE	-1.0403	24.9453	-3.77488	0.00784274	0.0121376	TRUE	25.4654	24.4251	3	3	small subunit ribosomal protein S4	KO:K02986	Bacteria;Proteobacteria;Betaproteobacteria;Burkholderiales;Oxalobacteraceae;Noviherbaspirillum;Noviherbaspirillum sp. Root189;Noviherbaspirillum sp. Root189	NA	KO:K02986	Ga0394449_05241	k141_5316	Noviherbaspirillum sp. BP10	2831285802	MEGAHIT-QMFCE002AF.10.fa
Ga0394449_02985_397078_397563	82.9079	-6.05541	1.31566	-4.60256	4.17322e-06	1.15993e-05	DE	-1.25369	26.8199	-3.93078	0.00899095	0.0133427	TRUE	27.3214	26.0677	3	2	hypothetical protein	Hypo-rule applied	Bacteria;Proteobacteria;Betaproteobacteria;Burkholderiales;Oxalobacteraceae;Herbaspirillum;Herbaspirillum sp. SJZ107;Herbaspirillum sp. SJZ107	NA	NA	Ga0394449_02985	k141_3026	Noviherbaspirillum sp. BP10	2831285802	MEGAHIT-QMFCE002AF.10.fa
Ga0394449_09350_240422_241204	424.781	-7.4771	1.64815	-4.53666	5.71531e-06	1.56495e-05	DE	-0.986077	24.6557	-3.86711	0.00699412	0.010876	TRUE	25.1488	24.1627	3	3	enoyl-[acyl-carrier protein] reductase I	KO:K00208	Bacteria;Proteobacteria;Betaproteobacteria;Burkholderiales;Oxalobacteraceae;Noviherbaspirillum;Noviherbaspirillum denitrificans;Noviherbaspirillum denitrificans TSA40	EC:1.3.1.10,EC:1.3.1.9	KO:K00208	Ga0394449_09350	k141_9463	Noviherbaspirillum sp. BP10	2831285802	MEGAHIT-QMFCE002AF.10.fa
Ga0394449_02985_9578_11560	605.91	-5.22309	1.7739	-2.94441	0.0032357	0.00599231	DE	0.942341	26.2505	3.96427	0.00867068	0.013039	TRUE	25.6851	26.6275	2	3	acetyl-CoA synthetase	KO:K01895	Bacteria;Proteobacteria;Betaproteobacteria;Burkholderiales;Oxalobacteraceae;Noviherbaspirillum;Noviherbaspirillum denitrificans;Noviherbaspirillum denitrificans TSA40	EC:6.2.1.1	KO:K01895	Ga0394449_02985	k141_3026	Noviherbaspirillum sp. BP10	2831285802	MEGAHIT-QMFCE002AF.10.fa
Ga0394449_17847_224491_225909	872.957	-8.84659	1.59499	-5.54649	2.91467e-08	1.04408e-07	DE	-0.688527	24.5621	-3.93123	0.00646384	0.0101485	TRUE	24.9064	24.2178	3	3	adenosylhomocysteinase	KO:K01251	Bacteria;Proteobacteria;Betaproteobacteria;Burkholderiales;Oxalobacteraceae;Noviherbaspirillum;Noviherbaspirillum denitrificans;Noviherbaspirillum denitrificans TSA40	EC:3.3.1.1	KO:K01251	Ga0394449_17847	k141_18081	Noviherbaspirillum sp. BP10	2831285802	MEGAHIT-QMFCE002AF.10.fa
Ga0394449_05241_117738_118565	1264.88	-7.49976	1.57911	-4.74934	2.0408e-06	5.87684e-06	DE	-1.44093	25.162	-4.05205	0.0078907	0.0121409	TRUE	26.0266	24.5856	2	3	large subunit ribosomal protein L2	KO:K02886	Bacteria;Proteobacteria;Betaproteobacteria;Burkholderiales;Oxalobacteraceae;Noviherbaspirillum;Noviherbaspirillum autotrophicum;Noviherbaspirillum autotrophicum TSA66	NA	KO:K02886	Ga0394449_05241	k141_5316	Noviherbaspirillum sp. BP10	2831285802	MEGAHIT-QMFCE002AF.10.fa
Ga0394449_00731_39742_40170	1339.69	-5.27551	1.78635	-2.95324	0.00314453	0.00583649	DE	-0.802178	24.6493	-4.25928	0.00986784	0.0143814	TRUE	25.0503	24.2482	2	2	large subunit ribosomal protein L13	KO:K02871	Bacteria;Proteobacteria;Betaproteobacteria;Burkholderiales;Oxalobacteraceae;Noviherbaspirillum;Noviherbaspirillum sp. Root189;Noviherbaspirillum sp. Root189	NA	KO:K02871	Ga0394449_00731	k141_740	Noviherbaspirillum sp. BP10	2831285802	MEGAHIT-QMFCE002AF.10.fa
Ga0394449_02985_459862_460572	1143.58	-9.40675	1.49812	-6.27902	3.40722e-10	1.49966e-09	DE	-1.21553	25.3609	-4.08925	0.00533643	0.00851167	TRUE	25.9686	24.7531	3	3	acetoacetyl-CoA reductase	KO:K00023	Bacteria;Proteobacteria;Betaproteobacteria;Burkholderiales;Oxalobacteraceae;Noviherbaspirillum;Noviherbaspirillum denitrificans;Noviherbaspirillum denitrificans TSA40	EC:1.1.1.36	KO:K00023	Ga0394449_02985	k141_3026	Noviherbaspirillum sp. BP10	2831285802	MEGAHIT-QMFCE002AF.10.fa
Ga0394449_05241_111708_112229	924.878	-7.71903	2.39764	-3.21943	0.00128447	0.0025134	DE	-1.22505	24.6022	-4.21352	0.00665452	0.0103977	TRUE	25.0923	23.8672	3	2	small subunit ribosomal protein S5	KO:K02988	Bacteria;Proteobacteria;Betaproteobacteria;Burkholderiales;Oxalobacteraceae;Noviherbaspirillum;Noviherbaspirillum denitrificans;Noviherbaspirillum denitrificans TSA40	NA	KO:K02988	Ga0394449_05241	k141_5316	Noviherbaspirillum sp. BP10	2831285802	MEGAHIT-QMFCE002AF.10.fa
Ga0394449_02985_404594_405784	88.4239	-9.13183	1.79832	-5.07799	3.81448e-07	1.19475e-06	DE	-6.5606	27.1075	-4.1266	0.00510288	0.00825093	TRUE	30.3878	23.8272	3	3	acetyl-CoA C-acetyltransferase	KO:K00626	Bacteria;Proteobacteria;Betaproteobacteria;Burkholderiales;Oxalobacteraceae;Noviherbaspirillum;Noviherbaspirillum autotrophicum;Noviherbaspirillum autotrophicum TSA66	EC:2.3.1.9	KO:K00626	Ga0394449_02985	k141_3026	Noviherbaspirillum sp. BP10	2831285802	MEGAHIT-QMFCE002AF.10.fa
Ga0394449_08617_29879_30673	623.241	-8.88386	2.1823	-4.07087	4.68388e-05	0.000115564	DE	-1.44026	24.2311	-4.19234	0.00471883	0.00770663	TRUE	24.9512	23.5109	3	3	3-hydroxybutyrate dehydrogenase	KO:K00019	Bacteria;Proteobacteria;Betaproteobacteria;Burkholderiales;Oxalobacteraceae;Noviherbaspirillum;Noviherbaspirillum denitrificans;Noviherbaspirillum denitrificans TSA40	EC:1.1.1.30	KO:K00019	Ga0394449_08617	k141_8724	Noviherbaspirillum sp. BP10	2831285802	MEGAHIT-QMFCE002AF.10.fa
Ga0394449_05241_118565_118882	1582.08	-6.81818	1.61417	-4.22396	2.40046e-05	6.1458e-05	DE	-0.952824	27.8935	-4.2067	0.00463929	0.00761499	TRUE	28.3699	27.4171	3	3	large subunit ribosomal protein L23	KO:K02892	Bacteria;Proteobacteria;Betaproteobacteria;Burkholderiales;Oxalobacteraceae;Noviherbaspirillum;Noviherbaspirillum denitrificans;Noviherbaspirillum denitrificans TSA40	NA	KO:K02892	Ga0394449_05241	k141_5316	Noviherbaspirillum sp. BP10	2831285802	MEGAHIT-QMFCE002AF.10.fa
Ga0394449_02985_460741_461943	473.465	-6.61138	1.63096	-4.05366	5.04219e-05	0.000123849	DE	-1.49233	25.2685	-4.23778	0.00447209	0.00737781	TRUE	26.0147	24.5224	3	3	acetyl-CoA C-acetyltransferase	KO:K00626	Bacteria;Proteobacteria;Betaproteobacteria;Burkholderiales;Oxalobacteraceae;Noviherbaspirillum;Noviherbaspirillum autotrophicum;Noviherbaspirillum autotrophicum TSA66	EC:2.3.1.9	KO:K00626	Ga0394449_02985	k141_3026	Noviherbaspirillum sp. BP10	2831285802	MEGAHIT-QMFCE002AF.10.fa
Ga0394449_02985_180228_182414	251.591	-9.76928	1.91737	-5.09514	3.4848e-07	1.09678e-06	DE	-0.817146	25.8399	-4.2653	0.00432963	0.00717924	TRUE	26.2484	25.4313	3	3	K(+)-stimulated pyrophosphate-energized sodium pump	KO:K15987	Bacteria;Proteobacteria;Betaproteobacteria;Burkholderiales;Oxalobacteraceae;Noviherbaspirillum;Noviherbaspirillum denitrificans;Noviherbaspirillum denitrificans TSA40	EC:3.6.1.1	KO:K15987	Ga0394449_02985	k141_3026	Noviherbaspirillum sp. BP10	2831285802	MEGAHIT-QMFCE002AF.10.fa
Ga0394449_08617_62713_65424	1805.38	-5.76647	2.20644	-2.61347	0.00896272	0.0153023	DE	-0.767201	24.9032	-4.42718	0.00534271	0.00851167	TRUE	25.2101	24.4429	3	2	aconitate hydratase	KO:K01681	Bacteria;Proteobacteria;Betaproteobacteria;Burkholderiales;Oxalobacteraceae;Noviherbaspirillum;Noviherbaspirillum autotrophicum;Noviherbaspirillum autotrophicum TSA66	EC:4.2.1.3	KO:K01681	Ga0394449_08617	k141_8724	Noviherbaspirillum sp. BP10	2831285802	MEGAHIT-QMFCE002AF.10.fa
Ga0394449_05990_169704_172550	1140.37	-9.05343	2.26189	-4.0026	6.26512e-05	0.000152001	DE	-0.703414	23.8957	-4.44119	0.00526757	0.00847505	TRUE	24.3178	23.6143	2	3	pilus assembly protein FimV	KO:K08086	Bacteria;Proteobacteria;Betaproteobacteria;Burkholderiales;Oxalobacteraceae;Noviherbaspirillum;Noviherbaspirillum sp. Root189;Noviherbaspirillum sp. Root189	NA	KO:K08086	Ga0394449_05990	k141_6075	Noviherbaspirillum sp. BP10	2831285802	MEGAHIT-QMFCE002AF.10.fa
Ga0394449_03860_130766_131698	212.328	-9.74672	3.04345	-3.20252	NA	NA	not_DE	-0.538135	25.5292	-4.34724	0.00393435	0.00655725	TRUE	25.7982	25.2601	3	3	cysteine synthase A	KO:K01738	Bacteria;Proteobacteria;Betaproteobacteria;Burkholderiales;Oxalobacteraceae;Noviherbaspirillum;Noviherbaspirillum denitrificans;Noviherbaspirillum denitrificans TSA40	EC:2.5.1.47	KO:K01738	Ga0394449_03860	k141_3911	Noviherbaspirillum sp. BP10	2831285802	MEGAHIT-QMFCE002AF.10.fa
Ga0394449_23432_76780_78618	424.727	-9.8331	1.99153	-4.93745	7.91488e-07	2.3937e-06	DE	-1.91479	23.9458	-5.98534	0.0145585	0.0204827	TRUE	24.9032	22.9884	1	1	2-oxoglutarate ferredoxin oxidoreductase subunit alpha	KO:K00174	Bacteria;Proteobacteria;Betaproteobacteria;Burkholderiales;Oxalobacteraceae;Noviherbaspirillum;Noviherbaspirillum denitrificans;Noviherbaspirillum denitrificans TSA40	EC:1.2.7.11,EC:1.2.7.3	KO:K00174	Ga0394449_23432	k141_23722	Noviherbaspirillum sp. BP10	2831285802	MEGAHIT-QMFCE002AF.10.fa
Ga0394449_05241_3471_3890	200.997	-6.32649	1.68199	-3.7613	0.000169031	0.000383634	DE	-2.013	23.477	-6.29234	0.0128954	0.0183014	TRUE	24.4835	22.4705	1	1	ApaG protein	KO:K06195	Bacteria;Proteobacteria;Betaproteobacteria;Burkholderiales;Oxalobacteraceae;Noviherbaspirillum;Noviherbaspirillum denitrificans;Noviherbaspirillum denitrificans TSA40	NA	KO:K06195	Ga0394449_05241	k141_5316	Noviherbaspirillum sp. BP10	2831285802	MEGAHIT-QMFCE002AF.10.fa
Ga0394449_05990_231033_232571	521.855	-9.42172	2.04385	-4.6098	NA	NA	not_DE	-1.21675	24.5476	-4.63173	0.00284361	0.00478847	TRUE	25.156	23.9392	3	3	2-isopropylmalate synthase	KO:K01649	Bacteria;Proteobacteria;Betaproteobacteria;Burkholderiales;Oxalobacteraceae;Noviherbaspirillum;Noviherbaspirillum autotrophicum;Noviherbaspirillum autotrophicum TSA66	EC:2.3.3.13	KO:K01649	Ga0394449_05990	k141_6075	Noviherbaspirillum sp. BP10	2831285802	MEGAHIT-QMFCE002AF.10.fa
Ga0394449_08617_130208_130573	168.205	-8.28458	2.26713	-3.65421	NA	NA	not_DE	-2.21345	25.8064	-5.13501	0.00477617	0.00776128	TRUE	26.3597	24.1463	3	1	two-component system chemotaxis response regulator CheY	KO:K03413	Bacteria;Proteobacteria;Betaproteobacteria;Burkholderiales;Oxalobacteraceae;Noviherbaspirillum;Noviherbaspirillum sp. Root189;Noviherbaspirillum sp. Root189	NA	KO:K03413	Ga0394449_08617	k141_8724	Noviherbaspirillum sp. BP10	2831285802	MEGAHIT-QMFCE002AF.10.fa
Ga0394449_05241_112242_112604	208.461	-8.66803	2.08765	-4.15206	3.29499e-05	8.30925e-05	DE	-1.22291	26.0447	-4.77186	0.00243381	0.00420739	TRUE	26.6562	25.4333	3	3	large subunit ribosomal protein L18	KO:K02881	Bacteria;Proteobacteria;Betaproteobacteria;Burkholderiales;Oxalobacteraceae;Noviherbaspirillum;Noviherbaspirillum denitrificans;Noviherbaspirillum denitrificans TSA40	NA	KO:K02881	Ga0394449_05241	k141_5316	Noviherbaspirillum sp. BP10	2831285802	MEGAHIT-QMFCE002AF.10.fa
Ga0394449_02985_168701_168937	888.929	-5.5606	1.76997	-3.14163	0.00168008	0.00322663	DE	1.34621	28.2805	4.80843	0.00233802	0.0040634	TRUE	27.6074	28.9536	3	3	large subunit ribosomal protein L28	KO:K02902	Bacteria;Proteobacteria;Betaproteobacteria;Burkholderiales;Oxalobacteraceae;Noviherbaspirillum;Noviherbaspirillum massiliense;Noviherbaspirillum massiliense JC206	NA	KO:K02902	Ga0394449_02985	k141_3026	Noviherbaspirillum sp. BP10	2831285802	MEGAHIT-QMFCE002AF.10.fa
Ga0394449_05990_56600_57175	2321.89	-6.1169	0.984814	-6.21122	5.25733e-10	2.26916e-09	DE	1.48694	25.4793	5.11234	0.00275784	0.00471736	TRUE	24.5872	26.0741	2	3	elongation factor P	KO:K02356	Bacteria;Proteobacteria;Betaproteobacteria;Burkholderiales;Oxalobacteraceae;Noviherbaspirillum;Noviherbaspirillum sp. Root189;Noviherbaspirillum sp. Root189	NA	KO:K02356	Ga0394449_05990	k141_6075	Noviherbaspirillum sp. BP10	2831285802	MEGAHIT-QMFCE002AF.10.fa
Ga0394449_09390_23279_24322	672.921	-8.08305	1.54542	-5.23032	1.69216e-07	5.54062e-07	DE	-0.968072	24.7238	-4.9169	0.0020778	0.00365019	TRUE	25.2079	24.2398	3	3	recombination protein RecA	KO:K03553	Bacteria;Proteobacteria;Betaproteobacteria;Burkholderiales;Oxalobacteraceae;Noviherbaspirillum;Noviherbaspirillum denitrificans;Noviherbaspirillum denitrificans TSA40	NA	KO:K03553	Ga0394449_09390	k141_9504	Noviherbaspirillum sp. BP10	2831285802	MEGAHIT-QMFCE002AF.10.fa
Ga0394449_17847_427006_427317	2525.28	-7.61685	1.77373	-4.29426	NA	NA	not_DE	-1.33031	26.3463	-4.94838	0.00200847	0.00354757	TRUE	27.0115	25.6812	3	3	large subunit ribosomal protein L21	KO:K02888	Bacteria;Proteobacteria;Betaproteobacteria;Burkholderiales;Oxalobacteraceae;Noviherbaspirillum;Noviherbaspirillum sp. Root189;Noviherbaspirillum sp. Root189	NA	KO:K02888	Ga0394449_17847	k141_18081	Noviherbaspirillum sp. BP10	2831285802	MEGAHIT-QMFCE002AF.10.fa
Ga0394449_17581_65675_66802	236.6	-6.94816	2.30276	-3.01732	0.0025502	0.0047827	DE	-1.89862	23.8707	-5.22707	0.00248363	0.0042708	TRUE	24.6301	22.7315	3	2	ABC-type branched-subunit amino acid transport system substrate-binding protein	COG0683	Bacteria;Proteobacteria;Betaproteobacteria;Burkholderiales;Oxalobacteraceae;Noviherbaspirillum;Noviherbaspirillum denitrificans;Noviherbaspirillum denitrificans TSA40	NA	NA	Ga0394449_17581	k141_17810	Noviherbaspirillum sp. BP10	2831285802	MEGAHIT-QMFCE002AF.10.fa
Ga0394449_02985_197121_198254	56.4881	-8.63808	1.93979	-4.45309	8.46427e-06	2.27307e-05	DE	-1.9915	23.6663	-5.85769	0.00280523	0.00477329	TRUE	24.6621	22.6706	2	2	aspartate aminotransferase-like enzyme	COG0075	Bacteria;Proteobacteria;Betaproteobacteria;Burkholderiales;Oxalobacteraceae;Noviherbaspirillum;Noviherbaspirillum autotrophicum;Noviherbaspirillum autotrophicum TSA66	NA	NA	Ga0394449_02985	k141_3026	Noviherbaspirillum sp. BP10	2831285802	MEGAHIT-QMFCE002AF.10.fa
Ga0394449_23199_37356_37874	107.552	-5.40277	1.59068	-3.39652	0.00068249	0.00139812	DE	-0.965863	26.6552	-5.19674	0.00154397	0.00275708	TRUE	27.1382	26.1723	3	3	peptidoglycan-associated lipoprotein	KO:K03640	Bacteria;Proteobacteria;Betaproteobacteria;Burkholderiales;Oxalobacteraceae;Noviherbaspirillum;Noviherbaspirillum massiliense;Noviherbaspirillum massiliense JC206	NA	KO:K03640	Ga0394449_23199	k141_23487	Noviherbaspirillum sp. BP10	2831285802	MEGAHIT-QMFCE002AF.10.fa
Ga0394449_08617_1322_3451	2403.26	-3.89179	1.66272	-2.34061	0.0192522	0.0298095	DE	-0.81265	25.575	-5.35635	0.00130951	0.00237761	TRUE	25.9814	25.1687	3	3	polyribonucleotide nucleotidyltransferase	KO:K00962	Bacteria;Proteobacteria;Betaproteobacteria;Burkholderiales;Oxalobacteraceae;Noviherbaspirillum;Noviherbaspirillum autotrophicum;Noviherbaspirillum autotrophicum TSA66	EC:2.7.7.8	KO:K00962	Ga0394449_08617	k141_8724	Noviherbaspirillum sp. BP10	2831285802	MEGAHIT-QMFCE002AF.10.fa
Ga0394449_23199_151540_155094	9152.51	-5.74488	0.914016	-6.28532	3.27179e-10	1.44345e-09	DE	-1.67367	25.1837	-6.97122	0.00341999	0.00572937	TRUE	26.2995	24.6258	1	2	S-layer protein	KO:K12544	Bacteria;Proteobacteria;Betaproteobacteria;Burkholderiales;Oxalobacteraceae;Massilia;Massilia psychrophila;Massilia psychrophila JCM 30813	NA	KO:K12544	Ga0394449_23199	k141_23487	Noviherbaspirillum sp. BP10	2831285802	MEGAHIT-QMFCE002AF.10.fa
Ga0394449_08617_9289_9765	974.009	-4.01654	1.54142	-2.60573	0.00916784	0.0155884	DE	-2.17112	25.355	-5.78071	0.00153185	0.00275056	TRUE	26.2234	24.0523	3	2	NADH-quinone oxidoreductase subunit B	KO:K00331	Bacteria;Proteobacteria;Betaproteobacteria;Burkholderiales;Oxalobacteraceae;Noviherbaspirillum;Noviherbaspirillum denitrificans;Noviherbaspirillum denitrificans TSA40	EC:1.6.5.3	KO:K00331	Ga0394449_08617	k141_8724	Noviherbaspirillum sp. BP10	2831285802	MEGAHIT-QMFCE002AF.10.fa
Ga0394449_09350_191280_191642	339.053	-12.117	1.82253	-6.64848	2.96127e-11	1.50831e-10	DE	-2.44682	23.2845	-7.36673	0.00284072	0.00478847	TRUE	24.9157	22.4689	1	2	CheY-like chemotaxis protein	COG0784	Bacteria;Proteobacteria;Betaproteobacteria;Burkholderiales;Oxalobacteraceae;Noviherbaspirillum;Noviherbaspirillum denitrificans;Noviherbaspirillum denitrificans TSA40	NA	NA	Ga0394449_09350	k141_9463	Noviherbaspirillum sp. BP10	2831285802	MEGAHIT-QMFCE002AF.10.fa
Ga0394449_05241_45407_46057	1214.01	-10.1568	2.1625	-4.69679	NA	NA	not_DE	-1.42189	24.2756	-6.53409	0.00178444	0.00316908	TRUE	24.9865	23.5646	2	2	phospholipid transport system substrate-binding protein	KO:K07323	Bacteria;Proteobacteria;Betaproteobacteria;Burkholderiales;Oxalobacteraceae;Noviherbaspirillum;Noviherbaspirillum denitrificans;Noviherbaspirillum denitrificans TSA40	NA	KO:K07323	Ga0394449_05241	k141_5316	Noviherbaspirillum sp. BP10	2831285802	MEGAHIT-QMFCE002AF.10.fa
Ga0394449_17847_344005_345804	491.01	-9.64553	2.09519	-4.60366	4.1513e-06	1.15405e-05	DE	-1.35634	24.7623	-5.97082	0.00130802	0.00237761	TRUE	25.5761	24.2198	2	3	aspartyl-tRNA synthetase	KO:K01876	Bacteria;Proteobacteria;Betaproteobacteria;Burkholderiales;Oxalobacteraceae;Noviherbaspirillum;Noviherbaspirillum sp. Root189;Noviherbaspirillum sp. Root189	EC:6.1.1.12	KO:K01876	Ga0394449_17847	k141_18081	Noviherbaspirillum sp. BP10	2831285802	MEGAHIT-QMFCE002AF.10.fa
Ga0394449_00595_26378_28705	1324.16	-7.94063	1.53544	-5.17157	2.32136e-07	7.47137e-07	DE	-1.0235	24.953	-5.79871	0.000843759	0.00160563	TRUE	25.4648	24.4413	3	3	twitching motility protein PilJ	KO:K02660	Bacteria;Proteobacteria;Betaproteobacteria;Burkholderiales;Oxalobacteraceae;Noviherbaspirillum;Noviherbaspirillum autotrophicum;Noviherbaspirillum autotrophicum TSA66	NA	KO:K02660	Ga0394449_00595	k141_604	Noviherbaspirillum sp. BP10	2831285802	MEGAHIT-QMFCE002AF.10.fa
Ga0394449_05241_118879_119499	1479.24	-5.30633	1.11711	-4.75005	2.03363e-06	5.85847e-06	DE	1.07275	24.9208	5.91991	0.000751141	0.0014531	TRUE	24.3844	25.4571	3	3	large subunit ribosomal protein L4	KO:K02926	Bacteria;Proteobacteria;Betaproteobacteria;Burkholderiales;Oxalobacteraceae;Noviherbaspirillum;Noviherbaspirillum autotrophicum;Noviherbaspirillum autotrophicum TSA66	NA	KO:K02926	Ga0394449_05241	k141_5316	Noviherbaspirillum sp. BP10	2831285802	MEGAHIT-QMFCE002AF.10.fa
Ga0394449_08617_26457_27233	341.822	-8.24408	1.29922	-6.34542	2.21825e-10	9.94815e-10	DE	-2.15827	23.891	-6.52233	0.000844808	0.00160563	TRUE	25.186	23.0277	2	3	NAD(P)-dependent dehydrogenase (short-subunit alcohol dehydrogenase family)	COG1028	Bacteria;Proteobacteria;Betaproteobacteria;Burkholderiales;Oxalobacteraceae;Noviherbaspirillum;Noviherbaspirillum autotrophicum;Noviherbaspirillum autotrophicum TSA66	NA	NA	Ga0394449_08617	k141_8724	Noviherbaspirillum sp. BP10	2831285802	MEGAHIT-QMFCE002AF.10.fa
Ga0394449_00731_40180_40572	682.965	-9.44335	2.11059	-4.47428	7.66692e-06	2.06936e-05	DE	-1.42664	27.0128	-6.31249	0.000521415	0.00103329	TRUE	27.7262	26.2995	3	3	small subunit ribosomal protein S9	KO:K02996	Bacteria;Proteobacteria;Betaproteobacteria;Burkholderiales;Oxalobacteraceae;Noviherbaspirillum;Noviherbaspirillum sp. Root189;Noviherbaspirillum sp. Root189	NA	KO:K02996	Ga0394449_00731	k141_740	Noviherbaspirillum sp. BP10	2831285802	MEGAHIT-QMFCE002AF.10.fa
Ga0394449_04570_103976_104419	127.896	-8.92311	2.04345	-4.36669	1.26142e-05	3.32768e-05	DE	-1.60309	24.2129	-6.84291	0.000664062	0.00129234	TRUE	25.1748	23.5717	2	3	HSP20 family protein	KO:K13993	Bacteria;Proteobacteria;Betaproteobacteria;Burkholderiales;Oxalobacteraceae;Noviherbaspirillum;Noviherbaspirillum denitrificans;Noviherbaspirillum denitrificans TSA40	NA	KO:K13993	Ga0394449_04570	k141_4630	Noviherbaspirillum sp. BP10	2831285802	MEGAHIT-QMFCE002AF.10.fa
Ga0394449_05241_112617_113150	2502.59	-8.04158	1.73304	-4.64015	3.4816e-06	9.77518e-06	DE	-1.99717	25.9661	-6.38886	0.000486633	0.000970281	TRUE	26.9647	24.9675	3	3	large subunit ribosomal protein L6	KO:K02933	Bacteria;Proteobacteria;Betaproteobacteria;Burkholderiales;Oxalobacteraceae;Noviherbaspirillum;Noviherbaspirillum denitrificans;Noviherbaspirillum denitrificans TSA40	NA	KO:K02933	Ga0394449_05241	k141_5316	Noviherbaspirillum sp. BP10	2831285802	MEGAHIT-QMFCE002AF.10.fa
Ga0394449_02985_283889_284818	1733.57	-9.57281	1.43036	-6.69258	2.19265e-11	1.14855e-10	DE	1.89708	26.9192	6.68047	0.00037599	0.00076373	TRUE	25.9707	27.8678	3	3	electron transfer flavoprotein alpha subunit	KO:K03522	Bacteria;Proteobacteria;Betaproteobacteria;Burkholderiales;Oxalobacteraceae;Noviherbaspirillum;Noviherbaspirillum autotrophicum;Noviherbaspirillum autotrophicum TSA66	NA	KO:K03522	Ga0394449_02985	k141_3026	Noviherbaspirillum sp. BP10	2831285802	MEGAHIT-QMFCE002AF.10.fa
Ga0394449_09390_53743_54099	103.039	-10.1492	2.37647	-4.2707	NA	NA	not_DE	-2.9651	25.1939	-7.37895	0.000452945	0.000908687	TRUE	26.3799	23.4148	3	2	outer membrane protein assembly factor BamE	KO:K06186	Bacteria;Proteobacteria;Betaproteobacteria;Burkholderiales;Oxalobacteraceae;Noviherbaspirillum;Noviherbaspirillum autotrophicum;Noviherbaspirillum autotrophicum TSA66	NA	KO:K06186	Ga0394449_09390	k141_9504	Noviherbaspirillum sp. BP10	2831285802	MEGAHIT-QMFCE002AF.10.fa
Ga0394449_04570_43339_46035	2504.96	-8.57206	1.60041	-5.35618	8.50017e-08	2.87276e-07	DE	-2.50154	23.7111	-10.1663	0.000944745	0.00178513	TRUE	25.3788	22.8772	1	2	pyruvate dehydrogenase E1 component	KO:K00163	Bacteria;Proteobacteria;Betaproteobacteria;Burkholderiales;Oxalobacteraceae;Noviherbaspirillum;Noviherbaspirillum massiliense;Noviherbaspirillum massiliense JC206	EC:1.2.4.1	KO:K00163	Ga0394449_04570	k141_4630	Noviherbaspirillum sp. BP10	2831285802	MEGAHIT-QMFCE002AF.10.fa
Ga0394449_04201_202545_204065	3002.11	-17.3066	1.83454	-9.43374	3.95737e-21	9.82706e-20	DE	-2.43582	25.9645	-6.87193	0.000318909	0.000655983	TRUE	27.1825	24.7466	3	3	aldehyde dehydrogenase	KO:K00138	Bacteria;Proteobacteria;Betaproteobacteria;Burkholderiales;Oxalobacteraceae;Noviherbaspirillum;Noviherbaspirillum autotrophicum;Noviherbaspirillum autotrophicum TSA66	EC:1.2.1.-	KO:K00138	Ga0394449_04201	k141_4256	Noviherbaspirillum sp. BP10	2831285802	MEGAHIT-QMFCE002AF.10.fa
Ga0394449_00731_46215_47510	1159.84	-7.69964	1.48793	-5.17475	2.28221e-07	7.35489e-07	DE	3.23351	26.2337	6.89051	0.000313913	0.000649819	TRUE	24.617	27.8505	3	3	tyrosyl-tRNA synthetase	KO:K01866	Bacteria;Proteobacteria;Betaproteobacteria;Burkholderiales;Oxalobacteraceae;Noviherbaspirillum;Noviherbaspirillum sp. Root189;Noviherbaspirillum sp. Root189	EC:6.1.1.1	KO:K01866	Ga0394449_00731	k141_740	Noviherbaspirillum sp. BP10	2831285802	MEGAHIT-QMFCE002AF.10.fa
Ga0394449_03860_19002_20165	1050.44	-10.3711	2.07048	-5.00901	5.47116e-07	1.68675e-06	DE	-1.3244	25.6437	-7.00224	0.000285684	0.000595175	TRUE	26.3059	24.9815	3	3	branched-chain amino acid transport system substrate-binding protein	KO:K01999	Bacteria;Proteobacteria;Betaproteobacteria;Burkholderiales;Oxalobacteraceae;Noviherbaspirillum;Noviherbaspirillum autotrophicum;Noviherbaspirillum autotrophicum TSA66	NA	KO:K01999	Ga0394449_03860	k141_3911	Noviherbaspirillum sp. BP10	2831285802	MEGAHIT-QMFCE002AF.10.fa
Ga0394449_09350_151206_151733	205.779	-8.11696	2.25458	-3.60022	0.000317952	0.000688658	DE	-1.3048	26.1119	-7.27828	0.000227492	0.000486415	TRUE	26.7643	25.4595	3	3	peptidoglycan-associated lipoprotein	KO:K03640	Bacteria;Proteobacteria;Betaproteobacteria;Burkholderiales;Oxalobacteraceae;Noviherbaspirillum;Noviherbaspirillum sp. Root189;Noviherbaspirillum sp. Root189	NA	KO:K03640	Ga0394449_09350	k141_9463	Noviherbaspirillum sp. BP10	2831285802	MEGAHIT-QMFCE002AF.10.fa
Ga0394449_04201_272010_272693	49.8911	-2.7126	2.13299	-1.27174	NA	NA	not_DE	-1.55774	26.107	-7.38345	0.000208964	0.000452755	TRUE	26.8859	25.3282	3	3	nitrate reductase gamma subunit	KO:K00374	Bacteria;Proteobacteria;Betaproteobacteria;Burkholderiales;Oxalobacteraceae;Noviherbaspirillum;Noviherbaspirillum autotrophicum;Noviherbaspirillum autotrophicum TSA66	EC:1.7.99.4	KO:K00374	Ga0394449_04201	k141_4256	Noviherbaspirillum sp. BP10	2831285802	MEGAHIT-QMFCE002AF.10.fa
Ga0394449_08617_77489_78736	347.639	-8.45411	1.67453	-5.04866	4.44927e-07	1.38111e-06	DE	1.71649	26.0635	7.56412	0.000180999	0.000402909	TRUE	25.2052	26.9217	3	3	2-oxoglutarate dehydrogenase E2 component (dihydrolipoamide succinyltransferase)	KO:K00658	Bacteria;Proteobacteria;Betaproteobacteria;Burkholderiales;Oxalobacteraceae;Noviherbaspirillum;Noviherbaspirillum autotrophicum;Noviherbaspirillum autotrophicum TSA66	EC:2.3.1.61	KO:K00658	Ga0394449_08617	k141_8724	Noviherbaspirillum sp. BP10	2831285802	MEGAHIT-QMFCE002AF.10.fa
Ga0394449_05990_68044_69123	4369.7	-7.4258	1.70155	-4.36414	1.27626e-05	3.36438e-05	DE	-3.61879	26.4817	-7.71751	0.000160566	0.000364923	TRUE	28.2911	24.6723	3	3	TRAP-type mannitol/chloroaromatic compound transport system substrate-binding protein	COG4663	Bacteria;Proteobacteria;Betaproteobacteria;Burkholderiales;Oxalobacteraceae;Noviherbaspirillum;Noviherbaspirillum autotrophicum;Noviherbaspirillum autotrophicum TSA66	NA	NA	Ga0394449_05990	k141_6075	Noviherbaspirillum sp. BP10	2831285802	MEGAHIT-QMFCE002AF.10.fa
Ga0394449_04570_55796_56998	154.84	-12.5675	2.0515	-6.12601	9.01089e-10	3.78108e-09	DE	-1.73553	24.5871	-8.57952	0.000208028	0.000452755	TRUE	25.6284	23.8928	2	3	acetylornithine/N-succinyldiaminopimelate aminotransferase	KO:K00821	Bacteria;Proteobacteria;Betaproteobacteria;Burkholderiales;Oxalobacteraceae;Noviherbaspirillum;Noviherbaspirillum autotrophicum;Noviherbaspirillum autotrophicum TSA66	EC:2.6.1.11,EC:2.6.1.17	KO:K00821	Ga0394449_04570	k141_4630	Noviherbaspirillum sp. BP10	2831285802	MEGAHIT-QMFCE002AF.10.fa
Ga0394449_05241_115846_116265	85.7751	-6.18538	2.32717	-2.6579	NA	NA	not_DE	-1.66348	24.1421	-8.73219	0.000189734	0.000419479	TRUE	25.1402	23.4767	2	3	large subunit ribosomal protein L16	KO:K02878	Bacteria;Proteobacteria;Betaproteobacteria;Burkholderiales;Oxalobacteraceae;Noviherbaspirillum;Noviherbaspirillum autotrophicum;Noviherbaspirillum autotrophicum TSA66	NA	KO:K02878	Ga0394449_05241	k141_5316	Noviherbaspirillum sp. BP10	2831285802	MEGAHIT-QMFCE002AF.10.fa
Ga0394449_14355_13539_15188	1277.77	-2.93958	1.66454	-1.766	0.0773954	0.0968611	not_DE	1.67695	27.372	8.0027	0.000129171	0.000304207	TRUE	26.5336	28.2105	3	3	chaperonin GroEL	KO:K04077	Bacteria;Proteobacteria;Betaproteobacteria;Burkholderiales;Oxalobacteraceae;Noviherbaspirillum;Noviherbaspirillum autotrophicum;Noviherbaspirillum autotrophicum TSA66	NA	KO:K04077	Ga0394449_14355	k141_14543	Noviherbaspirillum sp. BP10	2831285802	MEGAHIT-QMFCE002AF.10.fa
Ga0394449_05241_114430_114744	1047.75	-8.44033	1.49211	-5.65664	1.54364e-08	5.7019e-08	DE	-3.12071	25.7311	-8.37015	9.85132e-05	0.000235417	TRUE	27.2915	24.1707	3	3	large subunit ribosomal protein L24	KO:K02895	Bacteria;Proteobacteria;Betaproteobacteria;Burkholderiales;Oxalobacteraceae;Noviherbaspirillum;Noviherbaspirillum autotrophicum;Noviherbaspirillum autotrophicum TSA66	NA	KO:K02895	Ga0394449_05241	k141_5316	Noviherbaspirillum sp. BP10	2831285802	MEGAHIT-QMFCE002AF.10.fa
Ga0394449_00731_40735_41778	210.156	-8.06108	2.21013	-3.64733	0.000264983	0.000582379	DE	-1.58223	24.1086	-8.45434	9.27154e-05	0.00022656	TRUE	24.8998	23.3175	3	3	N-acetyl-gamma-glutamyl-phosphate reductase	KO:K00145	Bacteria;Proteobacteria;Betaproteobacteria;Burkholderiales;Oxalobacteraceae;Noviherbaspirillum;Noviherbaspirillum autotrophicum;Noviherbaspirillum autotrophicum TSA66	EC:1.2.1.38	KO:K00145	Ga0394449_00731	k141_740	Noviherbaspirillum sp. BP10	2831285802	MEGAHIT-QMFCE002AF.10.fa
Ga0394449_17847_155325_156470	843.554	-6.24887	1.58608	-3.93982	8.15413e-05	0.000194776	DE	-2.09262	26.4512	-8.4895	9.041e-05	0.0002226	TRUE	27.4975	25.4049	3	3	branched-chain amino acid transport system substrate-binding protein	KO:K01999	Bacteria;Proteobacteria;Betaproteobacteria;Burkholderiales;Oxalobacteraceae;Noviherbaspirillum;Noviherbaspirillum denitrificans;Noviherbaspirillum denitrificans TSA40	NA	KO:K01999	Ga0394449_17847	k141_18081	Noviherbaspirillum sp. BP10	2831285802	MEGAHIT-QMFCE002AF.10.fa
Ga0394449_05241_106042_106380	396.276	-6.6222	1.52942	-4.32988	1.49191e-05	3.90537e-05	DE	-1.69376	24.9529	-8.54619	8.68294e-05	0.000217073	TRUE	25.7998	24.106	3	3	large subunit ribosomal protein L17	KO:K02879	Bacteria;Proteobacteria;Betaproteobacteria;Burkholderiales;Oxalobacteraceae;Noviherbaspirillum;Noviherbaspirillum autotrophicum;Noviherbaspirillum autotrophicum TSA66	NA	KO:K02879	Ga0394449_05241	k141_5316	Noviherbaspirillum sp. BP10	2831285802	MEGAHIT-QMFCE002AF.10.fa
Ga0394449_23199_14937_15953	361.003	-4.59888	1.75862	-2.61505	0.00892136	0.0152334	DE	1.40312	26.0819	8.55028	8.65775e-05	0.000217073	TRUE	25.3803	26.7834	3	3	C4-dicarboxylate-binding protein DctP	KO:K11688	Bacteria;Proteobacteria;Betaproteobacteria;Burkholderiales;Oxalobacteraceae;Noviherbaspirillum;Noviherbaspirillum autotrophicum;Noviherbaspirillum autotrophicum TSA66	NA	KO:K11688	Ga0394449_23199	k141_23487	Noviherbaspirillum sp. BP10	2831285802	MEGAHIT-QMFCE002AF.10.fa
Ga0394449_08617_123345_124595	782.494	-6.90916	1.53867	-4.49036	7.11033e-06	1.92645e-05	DE	-2.04841	26.2027	-8.74213	7.56424e-05	0.000193573	TRUE	27.2269	25.1785	3	3	aspartate kinase	KO:K00928	Bacteria;Proteobacteria;Betaproteobacteria;Burkholderiales;Oxalobacteraceae;Noviherbaspirillum;Noviherbaspirillum sp. Root189;Noviherbaspirillum sp. Root189	EC:2.7.2.4	KO:K00928	Ga0394449_08617	k141_8724	Noviherbaspirillum sp. BP10	2831285802	MEGAHIT-QMFCE002AF.10.fa
Ga0394449_01864_109065_110312	5228.1	-5.89046	1.39117	-4.23419	2.2938e-05	5.8899e-05	DE	-2.24401	25.9828	-9.82878	3.68396e-05	0.000102971	TRUE	27.1048	24.8608	3	3	branched-chain amino acid transport system substrate-binding protein	KO:K01999	Bacteria;Proteobacteria;Betaproteobacteria;Burkholderiales;Oxalobacteraceae;Noviherbaspirillum;Noviherbaspirillum denitrificans;Noviherbaspirillum denitrificans TSA40	NA	KO:K01999	Ga0394449_01864	k141_1887	Noviherbaspirillum sp. BP10	2831285802	MEGAHIT-QMFCE002AF.10.fa
Ga0394449_14355_44521_45165	3952.82	-7.80134	1.65845	-4.70399	2.55131e-06	7.26014e-06	DE	-3.73581	29.8852	-9.97883	3.3542e-05	9.47927e-05	TRUE	31.7531	28.0173	3	3	OOP family OmpA-OmpF porin	KO:K03286	Bacteria;Proteobacteria;Betaproteobacteria;Burkholderiales;Oxalobacteraceae;Noviherbaspirillum;Noviherbaspirillum autotrophicum;Noviherbaspirillum autotrophicum TSA66	NA	KO:K03286	Ga0394449_14355	k141_14543	Noviherbaspirillum sp. BP10	2831285802	MEGAHIT-QMFCE002AF.10.fa
Ga0394449_09390_79380_80042	179.222	-6.22789	1.47203	-4.23081	2.32852e-05	5.97287e-05	DE	-2.28413	24.7404	-11.8803	3.70694e-05	0.000102971	TRUE	25.654	23.3699	3	2	protein-L-isoaspartate(D-aspartate) O-methyltransferase	KO:K00573	Bacteria;Proteobacteria;Betaproteobacteria;Burkholderiales;Oxalobacteraceae;Noviherbaspirillum;Noviherbaspirillum autotrophicum;Noviherbaspirillum autotrophicum TSA66	EC:2.1.1.77	KO:K00573	Ga0394449_09390	k141_9504	Noviherbaspirillum sp. BP10	2831285802	MEGAHIT-QMFCE002AF.10.fa
Ga0394449_00731_27228_28514	766.017	-6.37193	1.54518	-4.12376	3.7274e-05	9.3382e-05	DE	2.64858	27.623	10.4989	2.44649e-05	7.22828e-05	TRUE	26.2987	28.9473	3	3	glutamate dehydrogenase (NAD(P)+)	KO:K00261	Bacteria;Proteobacteria;Betaproteobacteria;Burkholderiales;Oxalobacteraceae;Noviherbaspirillum;Noviherbaspirillum sp. Root189;Noviherbaspirillum sp. Root189	EC:1.4.1.3	KO:K00261	Ga0394449_00731	k141_740	Noviherbaspirillum sp. BP10	2831285802	MEGAHIT-QMFCE002AF.10.fa
Ga0394449_04201_283080_283580	6.87668	-2.95696	2.89942	-1.01984	0.307803	0.337523	not_DE	-3.45468	28.273	-10.5587	2.3615e-05	7.04116e-05	TRUE	30.0003	26.5456	3	3	cytochrome c5	COG3245	Bacteria;Proteobacteria;Betaproteobacteria;Burkholderiales;Oxalobacteraceae;Janthinobacterium;Janthinobacterium sp. CG23_2;Janthinobacterium sp. CG23_2	NA	NA	Ga0394449_04201	k141_4256	Noviherbaspirillum sp. BP10	2831285802	MEGAHIT-QMFCE002AF.10.fa
Ga0394449_05990_226886_227902	803.742	-4.27242	2.25693	-1.89302	0.0583549	0.0763646	not_DE	2.36293	25.7557	10.562	2.35688e-05	7.04116e-05	TRUE	24.5742	26.9371	3	3	ketol-acid reductoisomerase	KO:K00053	Bacteria;Proteobacteria;Betaproteobacteria;Burkholderiales;Oxalobacteraceae;Noviherbaspirillum;Noviherbaspirillum autotrophicum;Noviherbaspirillum autotrophicum TSA66	EC:1.1.1.86	KO:K00053	Ga0394449_05990	k141_6075	Noviherbaspirillum sp. BP10	2831285802	MEGAHIT-QMFCE002AF.10.fa
Ga0394449_08617_104462_104698	1400.74	-7.1346	1.589	-4.48998	7.12284e-06	1.92948e-05	DE	-1.79763	28.8912	-10.8541	1.98805e-05	6.03847e-05	TRUE	29.79	27.9924	3	3	host factor-I protein	KO:K03666	Bacteria;Proteobacteria;Betaproteobacteria;Burkholderiales;Oxalobacteraceae;Noviherbaspirillum;Noviherbaspirillum suwonense;Noviherbaspirillum suwonense DSM 26001	NA	KO:K03666	Ga0394449_08617	k141_8724	Noviherbaspirillum sp. BP10	2831285802	MEGAHIT-QMFCE002AF.10.fa
Ga0394449_03860_2243_3643	308.89	-6.08282	1.55675	-3.90739	9.32997e-05	0.000220919	DE	2.10933	25.839	11.0054	1.82328e-05	5.69776e-05	TRUE	24.7843	26.8937	3	3	F-type H+-transporting ATPase subunit beta	KO:K02112	Bacteria;Proteobacteria;Betaproteobacteria;Burkholderiales;Oxalobacteraceae;Noviherbaspirillum;Noviherbaspirillum denitrificans;Noviherbaspirillum denitrificans TSA40	EC:3.6.3.14	KO:K02112	Ga0394449_03860	k141_3911	Noviherbaspirillum sp. BP10	2831285802	MEGAHIT-QMFCE002AF.10.fa
Ga0394449_17581_119482_120666	185.57	-12.9003	1.774	-7.27187	3.5454e-13	2.39796e-12	DE	-2.05258	25.5688	-11.1897	1.64327e-05	5.28774e-05	TRUE	26.5951	24.5426	3	3	acetyl-CoA C-acetyltransferase	KO:K00626	Bacteria;Proteobacteria;Betaproteobacteria;Burkholderiales;Oxalobacteraceae;Noviherbaspirillum;Noviherbaspirillum autotrophicum;Noviherbaspirillum autotrophicum TSA66	EC:2.3.1.9	KO:K00626	Ga0394449_17581	k141_17810	Noviherbaspirillum sp. BP10	2831285802	MEGAHIT-QMFCE002AF.10.fa
Ga0394449_02985_278716_278970	715.222	-10.5673	1.99611	-5.29397	1.1969e-07	3.98628e-07	DE	-4.84138	26.2433	-13.4564	1.89421e-05	5.86304e-05	TRUE	28.1798	23.3385	3	2	small subunit ribosomal protein S16	KO:K02959	Bacteria;Proteobacteria;Betaproteobacteria;Burkholderiales;Oxalobacteraceae;Noviherbaspirillum;Noviherbaspirillum autotrophicum;Noviherbaspirillum autotrophicum TSA66	NA	KO:K02959	Ga0394449_02985	k141_3026	Noviherbaspirillum sp. BP10	2831285802	MEGAHIT-QMFCE002AF.10.fa
Ga0394449_01864_50811_51014	2798.81	-6.12931	1.78474	-3.43429	0.000594111	0.00122921	DE	-4.84215	27.0962	-11.4747	1.40351e-05	4.65451e-05	TRUE	29.5172	24.6751	3	3	CspA family cold shock protein	KO:K03704	Bacteria;Proteobacteria;Betaproteobacteria;Burkholderiales;Oxalobacteraceae;Noviherbaspirillum;Noviherbaspirillum denitrificans;Noviherbaspirillum denitrificans TSA40	NA	KO:K03704	Ga0394449_01864	k141_1887	Noviherbaspirillum sp. BP10	2831285802	MEGAHIT-QMFCE002AF.10.fa
Ga0394449_04201_289607_291556	2864.95	-6.7869	1.80878	-3.7522	0.000175288	0.00039711	DE	2.46845	26.1748	13.7629	1.67687e-05	5.34297e-05	TRUE	24.6937	27.1621	2	3	nitrous-oxide reductase	KO:K00376	Bacteria;Proteobacteria;Betaproteobacteria;Burkholderiales;Oxalobacteraceae;Noviherbaspirillum;Noviherbaspirillum autotrophicum;Noviherbaspirillum autotrophicum TSA66	EC:1.7.2.4	KO:K00376	Ga0394449_04201	k141_4256	Noviherbaspirillum sp. BP10	2831285802	MEGAHIT-QMFCE002AF.10.fa
Ga0394449_08617_13491_15827	1487.32	-7.42485	1.64558	-4.51198	6.42239e-06	1.74767e-05	DE	-2.25759	25.3048	-11.7975	1.17894e-05	4.16473e-05	TRUE	26.4336	24.176	3	3	NADH-quinone oxidoreductase subunit G	KO:K00336	Bacteria;Proteobacteria;Betaproteobacteria;Burkholderiales;Oxalobacteraceae;Noviherbaspirillum;Noviherbaspirillum sp. Root189;Noviherbaspirillum sp. Root189	EC:1.6.5.3	KO:K00336	Ga0394449_08617	k141_8724	Noviherbaspirillum sp. BP10	2831285802	MEGAHIT-QMFCE002AF.10.fa
Ga0394449_06371_97131_98441	1269.25	-6.35433	1.71723	-3.70033	0.000215318	0.000480651	DE	2.29405	27.612	11.9017	1.11547e-05	4.02807e-05	TRUE	26.465	28.759	3	3	isocitrate lyase	KO:K01637	Bacteria;Proteobacteria;Betaproteobacteria;Burkholderiales;Oxalobacteraceae;Noviherbaspirillum;Noviherbaspirillum massiliense;Noviherbaspirillum massiliense JC206	EC:4.1.3.1	KO:K01637	Ga0394449_06371	k141_6456	Noviherbaspirillum sp. BP10	2831285802	MEGAHIT-QMFCE002AF.10.fa
Ga0394449_03860_4574_6109	1575.07	-7.21513	1.79577	-4.01783	5.87353e-05	0.000142999	DE	2.94778	25.8026	12.3096	9.01955e-06	3.36937e-05	TRUE	24.3287	27.2765	3	3	F-type H+-transporting ATPase subunit alpha	KO:K02111	Bacteria;Proteobacteria;Betaproteobacteria;Burkholderiales;Oxalobacteraceae;Noviherbaspirillum;Noviherbaspirillum sp. Root189;Noviherbaspirillum sp. Root189	EC:3.6.3.14	KO:K02111	Ga0394449_03860	k141_3911	Noviherbaspirillum sp. BP10	2831285802	MEGAHIT-QMFCE002AF.10.fa
Ga0394449_09390_80408_81727	212.864	-8.82701	2.15271	-4.10043	4.12389e-05	0.000102575	DE	-2.88307	25.2181	-12.3914	8.65035e-06	3.30749e-05	TRUE	26.6596	23.7766	3	3	outer membrane protein	KO:K12340	Bacteria;Proteobacteria;Betaproteobacteria;Burkholderiales;Oxalobacteraceae;Noviherbaspirillum;Noviherbaspirillum denitrificans;Noviherbaspirillum denitrificans TSA40	NA	KO:K12340	Ga0394449_09390	k141_9504	Noviherbaspirillum sp. BP10	2831285802	MEGAHIT-QMFCE002AF.10.fa
Ga0394449_05241_80612_82777	1122.22	-6.884	1.68593	-4.08319	4.4421e-05	0.000109995	DE	-3.13158	24.7101	-12.795	7.06361e-06	2.83416e-05	TRUE	26.2759	23.1443	3	3	type IV pilus assembly protein PilQ	KO:K02666	Bacteria;Proteobacteria;Betaproteobacteria;Burkholderiales;Oxalobacteraceae;Noviherbaspirillum;Noviherbaspirillum autotrophicum;Noviherbaspirillum autotrophicum TSA66	NA	KO:K02666	Ga0394449_05241	k141_5316	Noviherbaspirillum sp. BP10	2831285802	MEGAHIT-QMFCE002AF.10.fa
Ga0394449_00595_29345_29710	1346.97	-6.78403	1.67869	-4.04127	5.31631e-05	0.000130239	DE	-3.96446	25.0473	-13.3567	5.37987e-06	2.3006e-05	TRUE	27.0295	23.065	3	3	twitching motility two-component system response regulator PilH	KO:K02658	Bacteria;Proteobacteria;Betaproteobacteria;Burkholderiales;Oxalobacteraceae;Noviherbaspirillum;Noviherbaspirillum sp. Root189;Noviherbaspirillum sp. Root189	NA	KO:K02658	Ga0394449_00595	k141_604	Noviherbaspirillum sp. BP10	2831285802	MEGAHIT-QMFCE002AF.10.fa
Ga0394449_00731_29741_30634	1183.83	-6.6731	1.6232	-4.11107	3.93823e-05	9.82681e-05	DE	-3.29893	27.6034	-13.3818	5.31605e-06	2.3006e-05	TRUE	29.2529	25.954	3	3	glutamate/aspartate transport system substrate-binding protein	KO:K10001	Bacteria;Proteobacteria;Betaproteobacteria;Burkholderiales;Oxalobacteraceae;Noviherbaspirillum;Noviherbaspirillum denitrificans;Noviherbaspirillum denitrificans TSA40	NA	KO:K10001	Ga0394449_00731	k141_740	Noviherbaspirillum sp. BP10	2831285802	MEGAHIT-QMFCE002AF.10.fa
Ga0394449_23199_126878_128593	1420.87	-7.67402	1.6212	-4.73354	2.20639e-06	6.33292e-06	DE	3.102	28.4804	13.5591	4.88983e-06	2.22216e-05	TRUE	26.9294	30.0314	3	3	nitrite reductase (NO-forming)/hydroxylamine reductase	KO:K15864	Bacteria;Proteobacteria;Betaproteobacteria;Burkholderiales;Oxalobacteraceae;Noviherbaspirillum;Noviherbaspirillum autotrophicum;Noviherbaspirillum autotrophicum TSA66	EC:1.7.2.1,EC:1.7.99.1	KO:K15864	Ga0394449_23199	k141_23487	Noviherbaspirillum sp. BP10	2831285802	MEGAHIT-QMFCE002AF.10.fa
Ga0394449_05241_78562_79845	1083.87	-5.61473	1.74396	-3.21953	0.00128402	0.00251284	DE	-4.88689	27.9193	-17.24	4.92293e-06	2.22216e-05	TRUE	29.874	24.9871	3	2	hypothetical protein	Hypo-rule applied	Bacteria;Proteobacteria;Betaproteobacteria;Burkholderiales;Oxalobacteraceae;Noviherbaspirillum;Noviherbaspirillum denitrificans;Noviherbaspirillum denitrificans TSA40	NA	NA	Ga0394449_05241	k141_5316	Noviherbaspirillum sp. BP10	2831285802	MEGAHIT-QMFCE002AF.10.fa
Ga0394449_09390_86821_88044	245.135	-8.56066	2.95793	-2.89414	0.00380195	0.00696581	DE	5.19815	28.0263	25.3468	4.47358e-06	2.07702e-05	TRUE	24.1277	29.3259	1	3	membrane fusion protein (multidrug efflux system)	KO:K03585	Bacteria;Proteobacteria;Betaproteobacteria;Burkholderiales;Oxalobacteraceae;Noviherbaspirillum;Noviherbaspirillum sp. Root189;Noviherbaspirillum sp. Root189	NA	KO:K03585	Ga0394449_09390	k141_9504	Noviherbaspirillum sp. BP10	2831285802	MEGAHIT-QMFCE002AF.10.fa
Ga0394449_04201_145290_146390	83.5859	-7.64856	2.42419	-3.1551	0.00160443	0.00308809	DE	-2.3008	25.1017	-14.7541	2.85561e-06	1.47313e-05	TRUE	26.2521	23.9513	3	3	predicted porin	COG3203	Bacteria;Proteobacteria;Betaproteobacteria;Burkholderiales;Oxalobacteraceae;Noviherbaspirillum;Noviherbaspirillum sp. Root189;Noviherbaspirillum sp. Root189	NA	NA	Ga0394449_04201	k141_4256	Noviherbaspirillum sp. BP10	2831285802	MEGAHIT-QMFCE002AF.10.fa
Ga0394449_00731_35093_36109	3086.54	-2.68838	1.25908	-2.1352	0.0327449	0.0465427	DE	-3.98111	30.981	-14.7957	2.80474e-06	1.47023e-05	TRUE	32.9715	28.9904	3	3	predicted porin	COG3203	Bacteria;Proteobacteria;Betaproteobacteria;Burkholderiales;Oxalobacteraceae;Noviherbaspirillum;Noviherbaspirillum autotrophicum;Noviherbaspirillum autotrophicum TSA66	NA	NA	Ga0394449_00731	k141_740	Noviherbaspirillum sp. BP10	2831285802	MEGAHIT-QMFCE002AF.10.fa
Ga0394449_04570_35221_36372	415.295	-4.95157	1.72613	-2.86859	0.00412304	0.00752364	DE	-3.09993	28.2835	-14.8523	2.73719e-06	1.45834e-05	TRUE	29.8335	26.7335	3	3	branched-chain amino acid transport system substrate-binding protein	KO:K01999	Bacteria;Proteobacteria;Betaproteobacteria;Burkholderiales;Oxalobacteraceae;Noviherbaspirillum;Noviherbaspirillum denitrificans;Noviherbaspirillum denitrificans TSA40	NA	KO:K01999	Ga0394449_04570	k141_4630	Noviherbaspirillum sp. BP10	2831285802	MEGAHIT-QMFCE002AF.10.fa
Ga0394449_23199_25602_26165	2770.16	-11.8023	2.04457	-5.77248	7.81122e-09	2.98574e-08	DE	-6.4076	26.9454	-27.5106	3.08742e-06	1.5284e-05	TRUE	30.1492	23.7416	2	2	phasin family protein	TIGR01841	Bacteria;Proteobacteria;Betaproteobacteria;Burkholderiales;Oxalobacteraceae;Noviherbaspirillum;Noviherbaspirillum denitrificans;Noviherbaspirillum denitrificans TSA40	NA	NA	Ga0394449_23199	k141_23487	Noviherbaspirillum sp. BP10	2831285802	MEGAHIT-QMFCE002AF.10.fa
Ga0394449_09390_20659_21825	331.896	-5.65804	1.55537	-3.63774	0.000275038	0.000602526	DE	3.14155	25.7358	15.1744	2.3866e-06	1.31466e-05	TRUE	24.165	27.3066	3	3	succinyl-CoA synthetase beta subunit	KO:K01903	Bacteria;Proteobacteria;Betaproteobacteria;Burkholderiales;Oxalobacteraceae;Noviherbaspirillum;Noviherbaspirillum denitrificans;Noviherbaspirillum denitrificans TSA40	EC:6.2.1.5	KO:K01903	Ga0394449_09390	k141_9504	Noviherbaspirillum sp. BP10	2831285802	MEGAHIT-QMFCE002AF.10.fa
Ga0394449_08617_137179_138945	268.002	-5.42928	1.53525	-3.53641	0.000405598	0.00086248	DE	-2.81141	25.6798	-15.2907	2.27282e-06	1.31466e-05	TRUE	27.0855	24.2741	3	3	methyl-accepting chemotaxis protein	COG0840	Bacteria;Proteobacteria;Betaproteobacteria;Burkholderiales;Oxalobacteraceae;Noviherbaspirillum;Noviherbaspirillum denitrificans;Noviherbaspirillum denitrificans TSA40	NA	NA	Ga0394449_08617	k141_8724	Noviherbaspirillum sp. BP10	2831285802	MEGAHIT-QMFCE002AF.10.fa
Ga0394449_00731_36516_37160	1550.27	-6.72504	1.69117	-3.97656	6.99179e-05	0.000168657	DE	-3.18118	32.0794	-15.4794	2.10138e-06	1.26472e-05	TRUE	33.67	30.4888	3	3	predicted porin	COG3203	Bacteria;Proteobacteria;Betaproteobacteria;Burkholderiales;Oxalobacteraceae;Noviherbaspirillum;Noviherbaspirillum autotrophicum;Noviherbaspirillum autotrophicum TSA66	NA	NA	Ga0394449_00731	k141_740	Noviherbaspirillum sp. BP10	2831285802	MEGAHIT-QMFCE002AF.10.fa
Ga0394449_05990_66569_67648	937.019	-6.68344	1.56651	-4.26646	1.98603e-05	5.12873e-05	DE	-3.24516	26.2531	-15.5937	2.00478e-06	1.22934e-05	TRUE	27.8757	24.6305	3	3	TRAP-type mannitol/chloroaromatic compound transport system substrate-binding protein	COG4663	Bacteria;Proteobacteria;Betaproteobacteria;Burkholderiales;Oxalobacteraceae;Noviherbaspirillum;Noviherbaspirillum sp. Root189;Noviherbaspirillum sp. Root189	NA	NA	Ga0394449_05990	k141_6075	Noviherbaspirillum sp. BP10	2831285802	MEGAHIT-QMFCE002AF.10.fa
Ga0394449_20927_81483_82469	235.562	-11.058	1.88594	-5.86337	4.53571e-09	1.77088e-08	DE	-4.15045	25.0338	-16.2921	1.51411e-06	1.00425e-05	TRUE	27.109	22.9585	3	3	tripartite ATP-independent transporter DctP family solute receptor	TIGR00787	Bacteria;Proteobacteria;Betaproteobacteria;Burkholderiales;Oxalobacteraceae;Noviherbaspirillum;Noviherbaspirillum sp. Root189;Noviherbaspirillum sp. Root189	NA	NA	Ga0394449_20927	k141_21201	Noviherbaspirillum sp. BP10	2831285802	MEGAHIT-QMFCE002AF.10.fa
Ga0394449_00731_124850_126436	542.168	-8.7776	2.15165	-4.07947	4.51389e-05	0.000111681	DE	-3.122	25.2872	-16.6128	1.33612e-06	9.39397e-06	TRUE	26.8482	23.7262	3	3	NAD(P) transhydrogenase subunit alpha	KO:K00324	Bacteria;Proteobacteria;Betaproteobacteria;Burkholderiales;Oxalobacteraceae;Noviherbaspirillum;Noviherbaspirillum autotrophicum;Noviherbaspirillum autotrophicum TSA66	EC:1.6.1.2	KO:K00324	Ga0394449_00731	k141_740	Noviherbaspirillum sp. BP10	2831285802	MEGAHIT-QMFCE002AF.10.fa
Ga0394449_17847_427359_427616	31.6285	-3.12022	1.60009	-1.95003	0.051173	0.0683314	not_DE	-5.18287	28.0533	-17.732	8.78799e-07	6.6779e-06	TRUE	30.6447	25.4619	3	3	large subunit ribosomal protein L27	KO:K02899	Bacteria;Proteobacteria;Betaproteobacteria;Burkholderiales;Oxalobacteraceae;Noviherbaspirillum;Noviherbaspirillum sp. Root189;Noviherbaspirillum sp. Root189	NA	KO:K02899	Ga0394449_17847	k141_18081	Noviherbaspirillum sp. BP10	2831285802	MEGAHIT-QMFCE002AF.10.fa
Ga0394449_04201_398467_398937	516.353	-7.04603	1.5144	-4.65268	3.27645e-06	9.23043e-06	DE	-3.74326	26.5466	-24.2195	7.62254e-07	6.04226e-06	TRUE	28.0439	24.3006	3	2	3-hydroxyacyl-[acyl-carrier-protein] dehydratase	KO:K02372	Bacteria;Proteobacteria;Betaproteobacteria;Burkholderiales;Oxalobacteraceae;Noviherbaspirillum;Noviherbaspirillum sp. Root189;Noviherbaspirillum sp. Root189	EC:4.2.1.59	KO:K02372	Ga0394449_04201	k141_4256	Noviherbaspirillum sp. BP10	2831285802	MEGAHIT-QMFCE002AF.10.fa
Ga0394449_02985_318759_319334	115.152	-8.12761	1.25894	-6.45591	1.0757e-10	4.99206e-10	DE	-3.89162	26.8329	-20.5407	3.40448e-07	3.68819e-06	TRUE	28.7787	24.8871	3	3	hypothetical protein	Hypo-rule applied	Bacteria;Proteobacteria;Betaproteobacteria;Burkholderiales;Burkholderiaceae;Cupriavidus;Cupriavidus basilensis;Cupriavidus basilensis OR16	NA	NA	Ga0394449_02985	k141_3026	Noviherbaspirillum sp. BP10	2831285802	MEGAHIT-QMFCE002AF.10.fa
Ga0394449_02985_145180_145398	23870.3	-9.63916	1.7389	-5.54324	2.9693e-08	1.06212e-07	DE	-5.03525	28.4956	-20.7182	3.22031e-07	3.61671e-06	TRUE	31.0132	25.9779	3	3	CspA family cold shock protein	KO:K03704	Bacteria;Proteobacteria;Betaproteobacteria;Burkholderiales;Oxalobacteraceae;Herbaspirillum;Herbaspirillum autotrophicum;Herbaspirillum autotrophicum IAM 14942	NA	KO:K03704	Ga0394449_02985	k141_3026	Noviherbaspirillum sp. BP10	2831285802	MEGAHIT-QMFCE002AF.10.fa
Ga0394449_08617_183916_185373	4146.07	-6.3551	1.15596	-5.49766	3.84859e-08	1.35778e-07	DE	-6.53561	30.9185	-21.3473	2.65389e-07	3.19449e-06	TRUE	34.1863	27.6507	3	3	flagellin	KO:K02406	Bacteria;Proteobacteria;Betaproteobacteria;Nitrosomonadales;Nitrosomonadaceae;Nitrosomonas;Nitrosomonas sp. Nm143;Nitrosomonas sp. Nm143 (v3)	NA	KO:K02406	Ga0394449_08617	k141_8724	Noviherbaspirillum sp. BP10	2831285802	MEGAHIT-QMFCE002AF.10.fa
Ga0394449_06371_170038_171696	2022.27	-8.10536	1.50161	-5.39777	6.74757e-08	2.30749e-07	DE	-3.42584	25.3673	-22.1483	2.0909e-07	2.83143e-06	TRUE	27.0803	23.6544	3	3	CTP synthase	KO:K01937	Bacteria;Proteobacteria;Betaproteobacteria;Burkholderiales;Oxalobacteraceae;Noviherbaspirillum;Noviherbaspirillum autotrophicum;Noviherbaspirillum autotrophicum TSA66	EC:6.3.4.2	KO:K01937	Ga0394449_06371	k141_6456	Noviherbaspirillum sp. BP10	2831285802	MEGAHIT-QMFCE002AF.10.fa
Ga0394449_00731_37157_37576	3880.29	-5.4348	1.88423	-2.88436	0.00392211	0.00717101	DE	-3.52604	31.2125	-22.6673	1.79959e-07	2.66599e-06	TRUE	32.9755	29.4495	3	3	predicted porin	COG3203	Bacteria;Proteobacteria;Betaproteobacteria;Burkholderiales;Oxalobacteraceae;Noviherbaspirillum;Noviherbaspirillum sp. Root189;Noviherbaspirillum sp. Root189	NA	NA	Ga0394449_00731	k141_740	Noviherbaspirillum sp. BP10	2831285802	MEGAHIT-QMFCE002AF.10.fa
Ga0394449_01864_82753_83025	122.433	-4.14049	1.57362	-2.63119	0.00850876	0.0146007	DE	-4.02906	28.1254	-23.0856	1.59847e-07	2.59751e-06	TRUE	30.1399	26.1108	3	3	DNA-binding protein HU-beta	KO:K03530	Bacteria;Proteobacteria;Betaproteobacteria;Burkholderiales;Oxalobacteraceae;Noviherbaspirillum;Noviherbaspirillum autotrophicum;Noviherbaspirillum autotrophicum TSA66	NA	KO:K03530	Ga0394449_01864	k141_1887	Noviherbaspirillum sp. BP10	2831285802	MEGAHIT-QMFCE002AF.10.fa
Ga0394449_05990_69415_70506	517.432	-6.93855	1.41617	-4.8995	9.60817e-07	2.87783e-06	DE	-4.80513	25.9217	-28.3901	4.17206e-08	1.04301e-06	TRUE	28.3243	23.5191	3	3	TRAP-type mannitol/chloroaromatic compound transport system substrate-binding protein	COG4663	Bacteria;Proteobacteria;Betaproteobacteria;Burkholderiales;Oxalobacteraceae;Noviherbaspirillum;Noviherbaspirillum humi;Noviherbaspirillum humi U15	NA	NA	Ga0394449_05990	k141_6075	Noviherbaspirillum sp. BP10	2831285802	MEGAHIT-QMFCE002AF.10.fa
Ga0394449_09390_17449_17928	4775.12	-6.90925	1.78951	-3.86098	0.000112932	0.000263932	DE	-7.10419	29.9219	-40.8891	3.86812e-09	6.2857e-07	TRUE	33.474	26.3698	3	3	type IV pilus assembly protein PilA	KO:K02650	Bacteria;Proteobacteria;Betaproteobacteria;Burkholderiales;Oxalobacteraceae;Noviherbaspirillum;Noviherbaspirillum humi;Noviherbaspirillum humi U15	NA	KO:K02650	Ga0394449_09390	k141_9504	Noviherbaspirillum sp. BP10	2831285802	MEGAHIT-QMFCE002AF.10.fa
Ga0394449_12314_3678_4001	640.728	-10.7828	1.96724	-5.48119	4.22486e-08	1.48492e-07	DE	-9.74996	29.338	-65.6198	1.75608e-10	5.70726e-08	TRUE	34.213	24.463	3	3	hyperosmotically inducible protein	KO:K04065	Bacteria;Proteobacteria;Betaproteobacteria;Burkholderiales;Oxalobacteraceae;Noviherbaspirillum;Noviherbaspirillum autotrophicum;Noviherbaspirillum autotrophicum TSA66	NA	KO:K04065	Ga0394449_12314	k141_12469	Noviherbaspirillum sp. BP10	2831285802	MEGAHIT-QMFCE002AF.10.fa
Ga0394449_00595_10506_11054	482.021	-10.872	2.01747	-5.38893	7.08791e-08	2.41558e-07	DE	NA	NA	NA	NA	NA	NA	NA	NA	NA	NA	dTDP-4-dehydrorhamnose 3,5-epimerase	KO:K01790	Bacteria;Proteobacteria;Betaproteobacteria;Burkholderiales;Oxalobacteraceae;Collimonas;Collimonas fungivorans;Collimonas fungivorans ES_Al-A1	EC:5.1.3.13	KO:K01790	Ga0394449_00595	k141_604	Noviherbaspirillum sp. BP10	2831285802	MEGAHIT-QMFCE002AF.10.fa
Ga0394449_00595_11057_11944	281.116	-7.72611	1.46911	-5.25904	1.44807e-07	4.78229e-07	DE	NA	NA	NA	NA	NA	NA	NA	NA	0	0	glucose-1-phosphate thymidylyltransferase	KO:K00973	Bacteria;Proteobacteria;Betaproteobacteria;Burkholderiales;Oxalobacteraceae;Noviherbaspirillum;Noviherbaspirillum denitrificans;Noviherbaspirillum denitrificans TSA40	EC:2.7.7.24	KO:K00973	Ga0394449_00595	k141_604	Noviherbaspirillum sp. BP10	2831285802	MEGAHIT-QMFCE002AF.10.fa
Ga0394449_00595_11941_13014	823.841	-7.89005	1.40868	-5.60102	2.1309e-08	7.72212e-08	DE	NA	NA	NA	NA	NA	NA	NA	NA	NA	NA	dTDP-glucose 4,6-dehydratase	KO:K01710	Bacteria;Proteobacteria;Betaproteobacteria;Burkholderiales;Oxalobacteraceae;Collimonas;Collimonas arenae;Collimonas arenae 515	EC:4.2.1.46	KO:K01710	Ga0394449_00595	k141_604	Noviherbaspirillum sp. BP10	2831285802	MEGAHIT-QMFCE002AF.10.fa
Ga0394449_00595_13193_14068	53.4201	-8.98003	1.79355	-5.00684	5.53305e-07	1.70478e-06	DE	NA	NA	NA	NA	NA	NA	NA	NA	NA	NA	bis(5'-nucleosyl)-tetraphosphatase (symmetrical)	KO:K01525	Bacteria;Proteobacteria;Betaproteobacteria;Burkholderiales;Oxalobacteraceae;Noviherbaspirillum;Noviherbaspirillum denitrificans;Noviherbaspirillum denitrificans TSA40	EC:3.6.1.41	KO:K01525	Ga0394449_00595	k141_604	Noviherbaspirillum sp. BP10	2831285802	MEGAHIT-QMFCE002AF.10.fa
Ga0394449_00595_14047_14814	91.55	-12.0991	2.32303	-5.20831	1.90568e-07	6.18819e-07	DE	NA	NA	NA	NA	NA	NA	NA	NA	NA	NA	1-acyl-sn-glycerol-3-phosphate acyltransferase	KO:K00655	Bacteria;Proteobacteria;Betaproteobacteria;Burkholderiales;Oxalobacteraceae;Noviherbaspirillum;Noviherbaspirillum denitrificans;Noviherbaspirillum denitrificans TSA40	EC:2.3.1.51	KO:K00655	Ga0394449_00595	k141_604	Noviherbaspirillum sp. BP10	2831285802	MEGAHIT-QMFCE002AF.10.fa
Ga0394449_00595_14826_16112	63.1266	-7.417	2.27261	-3.26365	0.00109986	0.00217179	DE	NA	NA	NA	NA	NA	NA	NA	NA	0	0	dihydroorotase	KO:K01465	Bacteria;Proteobacteria;Betaproteobacteria;Burkholderiales;Oxalobacteraceae;Noviherbaspirillum;Noviherbaspirillum massiliense;Noviherbaspirillum massiliense JC206	EC:3.5.2.3	KO:K01465	Ga0394449_00595	k141_604	Noviherbaspirillum sp. BP10	2831285802	MEGAHIT-QMFCE002AF.10.fa
Ga0394449_00595_17068_17574	25.7005	-8.3695	2.21203	-3.78364	0.000154554	0.000352977	DE	NA	NA	NA	NA	NA	NA	NA	NA	NA	NA	pyrimidine operon attenuation protein/uracil phosphoribosyltransferase	KO:K02825	Bacteria;Proteobacteria;Betaproteobacteria;Burkholderiales;Oxalobacteraceae;Noviherbaspirillum;Noviherbaspirillum autotrophicum;Noviherbaspirillum autotrophicum TSA66	EC:2.4.2.9	KO:K02825	Ga0394449_00595	k141_604	Noviherbaspirillum sp. BP10	2831285802	MEGAHIT-QMFCE002AF.10.fa
Ga0394449_00595_17561_17953	28.2713	-10.4287	2.23556	-4.66489	3.08776e-06	8.72023e-06	DE	NA	NA	NA	NA	NA	NA	NA	NA	NA	NA	putative Holliday junction resolvase	KO:K07447	Bacteria;Proteobacteria;Betaproteobacteria;Burkholderiales;Oxalobacteraceae;Noviherbaspirillum;Noviherbaspirillum autotrophicum;Noviherbaspirillum autotrophicum TSA66	EC:3.1.-	KO:K07447	Ga0394449_00595	k141_604	Noviherbaspirillum sp. BP10	2831285802	MEGAHIT-QMFCE002AF.10.fa
Ga0394449_00595_17946_18689	494.558	-9.80878	2.11659	-4.63424	3.58252e-06	1.00359e-05	DE	NA	NA	NA	NA	NA	NA	NA	NA	NA	NA	putative transcriptional regulator	KO:K07735	Bacteria;Proteobacteria;Betaproteobacteria;Burkholderiales;Oxalobacteraceae;Noviherbaspirillum;Noviherbaspirillum denitrificans;Noviherbaspirillum denitrificans TSA40	NA	KO:K07735	Ga0394449_00595	k141_604	Noviherbaspirillum sp. BP10	2831285802	MEGAHIT-QMFCE002AF.10.fa
Ga0394449_00595_1857_1952	0.185263	-0.836026	3.9667	-0.210761	0.833074	NA	not_DE	NA	NA	NA	NA	NA	NA	NA	NA	NA	NA	hypothetical protein	Hypo-rule applied	NA	NA	NA	Ga0394449_00595	k141_604	Noviherbaspirillum sp. BP10	2831285802	MEGAHIT-QMFCE002AF.10.fa
Ga0394449_00595_18698_20158	169.487	-12.9902	2.30605	-5.63308	1.77015e-08	6.47452e-08	DE	NA	NA	NA	NA	NA	NA	NA	NA	NA	NA	deoxyribodipyrimidine photo-lyase	KO:K01669	Bacteria;Proteobacteria;Betaproteobacteria;Burkholderiales;Oxalobacteraceae;Herminiimonas;Herminiimonas arsenitoxidans;Herminiimonas sp. AS8	EC:4.1.99.3	KO:K01669	Ga0394449_00595	k141_604	Noviherbaspirillum sp. BP10	2831285802	MEGAHIT-QMFCE002AF.10.fa
Ga0394449_00595_1947_2972	310.201	-11.4033	1.9915	-5.726	1.02827e-08	3.88271e-08	DE	NA	NA	NA	NA	NA	NA	NA	NA	NA	NA	UDP-glucose 4-epimerase	KO:K01784	Bacteria;Proteobacteria;Betaproteobacteria;Burkholderiales;Oxalobacteraceae;Noviherbaspirillum;Noviherbaspirillum sp. Root189;Noviherbaspirillum sp. Root189	EC:5.1.3.2	KO:K01784	Ga0394449_00595	k141_604	Noviherbaspirillum sp. BP10	2831285802	MEGAHIT-QMFCE002AF.10.fa
Ga0394449_00595_20242_26277	2160.75	-8.18835	1.60273	-5.10901	3.23849e-07	1.0236e-06	DE	NA	NA	NA	NA	NA	NA	NA	NA	NA	NA	chemosensory pili system protein ChpA (sensor histidine kinase/response regulator)	KO:K06596	Bacteria;Proteobacteria;Betaproteobacteria;Burkholderiales;Oxalobacteraceae;Noviherbaspirillum;Noviherbaspirillum autotrophicum;Noviherbaspirillum autotrophicum TSA66	NA	KO:K06596	Ga0394449_00595	k141_604	Noviherbaspirillum sp. BP10	2831285802	MEGAHIT-QMFCE002AF.10.fa
Ga0394449_00595_28760_29335	148.234	-7.29282	2.95785	-2.46558	0.0136792	0.0222387	DE	NA	23.4589	NA	NA	NA	NA	23.4589	NA	2	0	twitching motility protein PilI	KO:K02659	Bacteria;Proteobacteria;Betaproteobacteria;Burkholderiales;Oxalobacteraceae;Noviherbaspirillum;Noviherbaspirillum autotrophicum;Noviherbaspirillum autotrophicum TSA66	NA	KO:K02659	Ga0394449_00595	k141_604	Noviherbaspirillum sp. BP10	2831285802	MEGAHIT-QMFCE002AF.10.fa
Ga0394449_00595_29734_30135	1049.47	-8.68407	2.34022	-3.7108	0.000206608	0.000462786	DE	NA	NA	NA	NA	NA	NA	NA	NA	NA	NA	twitching motility two-component system response regulator PilG	KO:K02657	Bacteria;Proteobacteria;Betaproteobacteria;Burkholderiales;Oxalobacteraceae;Noviherbaspirillum;Noviherbaspirillum autotrophicum;Noviherbaspirillum autotrophicum TSA66	NA	KO:K02657	Ga0394449_00595	k141_604	Noviherbaspirillum sp. BP10	2831285802	MEGAHIT-QMFCE002AF.10.fa
Ga0394449_00595_2990_4138	124.617	-9.11703	1.93566	-4.71003	2.4768e-06	7.06022e-06	DE	NA	NA	NA	NA	NA	NA	NA	NA	NA	NA	rhamnosyl/mannosyltransferase	KO:K12995	Bacteria;Proteobacteria;Betaproteobacteria;Burkholderiales;Burkholderiaceae;Cupriavidus;Cupriavidus sp. amp6;Cupriavidus sp. AMP6	EC:2.4.1.-	KO:K12995	Ga0394449_00595	k141_604	Noviherbaspirillum sp. BP10	2831285802	MEGAHIT-QMFCE002AF.10.fa
Ga0394449_00595_30300_30515	40.9039	-5.10701	2.80802	-1.81872	NA	NA	not_DE	NA	NA	NA	NA	NA	NA	NA	NA	0	0	rubredoxin	COG1773	Bacteria;Proteobacteria;Betaproteobacteria;Burkholderiales;Oxalobacteraceae;Collimonas;Collimonas arenae;Collimonas arenae Ter282	NA	NA	Ga0394449_00595	k141_604	Noviherbaspirillum sp. BP10	2831285802	MEGAHIT-QMFCE002AF.10.fa
Ga0394449_00595_30552_31382	152.901	-9.89966	2.06361	-4.79724	1.60863e-06	4.68838e-06	DE	NA	NA	NA	NA	NA	NA	NA	NA	NA	NA	hydroxymethylpyrimidine/phosphomethylpyrimidine kinase	KO:K00941	Bacteria;Proteobacteria;Betaproteobacteria;Burkholderiales;Oxalobacteraceae;Noviherbaspirillum;Noviherbaspirillum denitrificans;Noviherbaspirillum denitrificans TSA40	EC:2.7.1.49,EC:2.7.4.7	KO:K00941	Ga0394449_00595	k141_604	Noviherbaspirillum sp. BP10	2831285802	MEGAHIT-QMFCE002AF.10.fa
Ga0394449_00595_31401_32684	264.256	-10.7918	2.08582	-5.1739	2.29254e-07	7.38658e-07	DE	NA	23.9534	NA	NA	NA	NA	NA	23.9534	0	3	glutamate-1-semialdehyde 2,1-aminomutase	KO:K01845	Bacteria;Proteobacteria;Betaproteobacteria;Burkholderiales;Oxalobacteraceae;Noviherbaspirillum;Noviherbaspirillum autotrophicum;Noviherbaspirillum autotrophicum TSA66	EC:5.4.3.8	KO:K01845	Ga0394449_00595	k141_604	Noviherbaspirillum sp. BP10	2831285802	MEGAHIT-QMFCE002AF.10.fa
Ga0394449_00595_32854_34131	156.727	-8.7131	1.97471	-4.41234	1.02259e-05	2.71781e-05	DE	NA	NA	NA	NA	NA	NA	NA	NA	NA	NA	NRAMP (natural resistance-associated macrophage protein)-like metal ion transporter	TIGR01197	Bacteria;Proteobacteria;Betaproteobacteria;Burkholderiales;Oxalobacteraceae;Janthinobacterium;Janthinobacterium sp. CG3;Janthinobacterium sp. CG3	NA	NA	Ga0394449_00595	k141_604	Noviherbaspirillum sp. BP10	2831285802	MEGAHIT-QMFCE002AF.10.fa
Ga0394449_00595_34171_35136	134.986	-7.08027	2.1251	-3.33174	0.000863053	0.00173191	DE	NA	NA	NA	NA	NA	NA	NA	NA	NA	NA	magnesium transporter	KO:K03284	Bacteria;Proteobacteria;Betaproteobacteria;Burkholderiales;Oxalobacteraceae;Noviherbaspirillum;Noviherbaspirillum denitrificans;Noviherbaspirillum denitrificans TSA40	NA	KO:K03284	Ga0394449_00595	k141_604	Noviherbaspirillum sp. BP10	2831285802	MEGAHIT-QMFCE002AF.10.fa
Ga0394449_00595_35472_35885	29.5657	-10.5867	1.97832	-5.35137	8.72913e-08	2.94667e-07	DE	NA	NA	NA	NA	NA	NA	NA	NA	NA	NA	hypothetical protein	Hypo-rule applied	Bacteria;Proteobacteria;Betaproteobacteria;Burkholderiales;Oxalobacteraceae;Noviherbaspirillum;Noviherbaspirillum denitrificans;Noviherbaspirillum denitrificans TSA40	NA	NA	Ga0394449_00595	k141_604	Noviherbaspirillum sp. BP10	2831285802	MEGAHIT-QMFCE002AF.10.fa
Ga0394449_00595_35904_36599	52.4299	-8.11074	3.02094	-2.68484	0.00725649	0.0126318	DE	NA	NA	NA	NA	NA	NA	NA	NA	NA	NA	monofunctional biosynthetic peptidoglycan transglycosylase	KO:K03814	Bacteria;Proteobacteria;Betaproteobacteria;Burkholderiales;Oxalobacteraceae;Noviherbaspirillum;Noviherbaspirillum denitrificans;Noviherbaspirillum denitrificans TSA40	EC:2.4.1.-	KO:K03814	Ga0394449_00595	k141_604	Noviherbaspirillum sp. BP10	2831285802	MEGAHIT-QMFCE002AF.10.fa
Ga0394449_00595_36604_37425	67.0036	-11.6526	2.3424	-4.97461	6.53789e-07	1.99707e-06	DE	NA	NA	NA	NA	NA	NA	NA	NA	NA	NA	shikimate dehydrogenase	KO:K00014	Bacteria;Proteobacteria;Betaproteobacteria;Burkholderiales;Oxalobacteraceae;Noviherbaspirillum;Noviherbaspirillum denitrificans;Noviherbaspirillum denitrificans TSA40	EC:1.1.1.25	KO:K00014	Ga0394449_00595	k141_604	Noviherbaspirillum sp. BP10	2831285802	MEGAHIT-QMFCE002AF.10.fa
Ga0394449_00595_37422_38312	29.1516	-6.03887	2.1131	-2.85782	0.00426557	0.00775624	DE	NA	NA	NA	NA	NA	NA	NA	NA	NA	NA	protein TonB	KO:K03832	Bacteria;Proteobacteria;Betaproteobacteria;Burkholderiales;Oxalobacteraceae;Noviherbaspirillum;Noviherbaspirillum sp. Root189;Noviherbaspirillum sp. Root189	NA	KO:K03832	Ga0394449_00595	k141_604	Noviherbaspirillum sp. BP10	2831285802	MEGAHIT-QMFCE002AF.10.fa
Ga0394449_00595_38386_40374	735.427	-10.7705	2.17277	-4.95704	NA	NA	not_DE	NA	NA	NA	NA	NA	NA	NA	NA	NA	NA	exoribonuclease-2	KO:K01147	Bacteria;Proteobacteria;Betaproteobacteria;Burkholderiales;Oxalobacteraceae;Noviherbaspirillum;Noviherbaspirillum autotrophicum;Noviherbaspirillum autotrophicum TSA66	EC:3.1.13.1	KO:K01147	Ga0394449_00595	k141_604	Noviherbaspirillum sp. BP10	2831285802	MEGAHIT-QMFCE002AF.10.fa
Ga0394449_00595_40430_40999	150.444	-11.0345	1.8089	-6.10012	1.05988e-09	4.42251e-09	DE	NA	NA	NA	NA	NA	NA	NA	NA	NA	NA	chorismate--pyruvate lyase	KO:K03181	Bacteria;Proteobacteria;Betaproteobacteria;Burkholderiales;Oxalobacteraceae;Noviherbaspirillum;Noviherbaspirillum autotrophicum;Noviherbaspirillum autotrophicum TSA66	EC:4.1.3.40	KO:K03181	Ga0394449_00595	k141_604	Noviherbaspirillum sp. BP10	2831285802	MEGAHIT-QMFCE002AF.10.fa
Ga0394449_00595_40996_41580	104.054	-7.25626	2.45405	-2.95685	0.00310804	0.00577164	DE	NA	NA	NA	NA	NA	NA	NA	NA	NA	NA	hypothetical protein	KO:K07000	Bacteria;Proteobacteria;Betaproteobacteria;Burkholderiales;Oxalobacteraceae;Herbaspirillum;Herbaspirillum lusitanum;Herbaspirillum lusitanum P6-12	NA	KO:K07000	Ga0394449_00595	k141_604	Noviherbaspirillum sp. BP10	2831285802	MEGAHIT-QMFCE002AF.10.fa
Ga0394449_00595_4140_5282	295.648	-6.94774	1.64388	-4.22643	2.37424e-05	6.08389e-05	DE	NA	NA	NA	NA	NA	NA	NA	NA	NA	NA	alpha-1,3-rhamnosyl/mannosyltransferase	KO:K00786/KO:K12994	Bacteria;Proteobacteria;Betaproteobacteria;Burkholderiales;Oxalobacteraceae;Massilia;Massilia sp. Root418;Massilia sp. Root418	EC:2.4.1.-	KO:K00786,KO:K12994	Ga0394449_00595	k141_604	Noviherbaspirillum sp. BP10	2831285802	MEGAHIT-QMFCE002AF.10.fa
Ga0394449_00595_41577_43007	390.848	-10.2674	1.9414	-5.28863	1.23233e-07	4.09909e-07	DE	NA	NA	NA	NA	NA	NA	NA	NA	NA	NA	UDP-N-acetylmuramate: L-alanyl-gamma-D-glutamyl-meso-diaminopimelate ligase	KO:K02558	Bacteria;Proteobacteria;Betaproteobacteria;Burkholderiales;Oxalobacteraceae;Noviherbaspirillum;Noviherbaspirillum denitrificans;Noviherbaspirillum denitrificans TSA40	EC:6.3.2.-	KO:K02558	Ga0394449_00595	k141_604	Noviherbaspirillum sp. BP10	2831285802	MEGAHIT-QMFCE002AF.10.fa
Ga0394449_00595_417_1556	395.416	-7.06023	1.65313	-4.27081	1.94761e-05	5.03559e-05	DE	NA	NA	NA	NA	NA	NA	NA	NA	NA	NA	UDP-N-acetylmuramyl pentapeptide phosphotransferase/UDP-N-acetylglucosamine-1-phosphate transferase	COG0472	Bacteria;Proteobacteria;Betaproteobacteria;Burkholderiales;Oxalobacteraceae;Janthinobacterium;unclassified Janthinobacterium;Janthinobacterium sp. HH104	NA	NA	Ga0394449_00595	k141_604	Noviherbaspirillum sp. BP10	2831285802	MEGAHIT-QMFCE002AF.10.fa
Ga0394449_00595_43208_43792	54.9193	-9.37506	2.28756	-4.09827	4.16249e-05	0.000103432	DE	NA	NA	NA	NA	NA	NA	NA	NA	NA	NA	hypothetical protein	Hypo-rule applied	Bacteria;Proteobacteria;Betaproteobacteria;Burkholderiales;Oxalobacteraceae;Noviherbaspirillum;Noviherbaspirillum sp. Root189;Noviherbaspirillum sp. Root189	NA	NA	Ga0394449_00595	k141_604	Noviherbaspirillum sp. BP10	2831285802	MEGAHIT-QMFCE002AF.10.fa
Ga0394449_00595_43789_44310	229.344	-6.91841	1.43572	-4.81877	1.44445e-06	4.22886e-06	DE	NA	NA	NA	NA	NA	NA	NA	NA	NA	NA	thiol-disulfide isomerase/thioredoxin	COG0526	Bacteria;Proteobacteria;Betaproteobacteria;Burkholderiales;Oxalobacteraceae;Noviherbaspirillum;Noviherbaspirillum sp. Root189;Noviherbaspirillum sp. Root189	NA	NA	Ga0394449_00595	k141_604	Noviherbaspirillum sp. BP10	2831285802	MEGAHIT-QMFCE002AF.10.fa
Ga0394449_00595_44311_44832	575.143	-8.19756	1.39217	-5.88833	3.90117e-09	1.5341e-08	DE	NA	NA	NA	NA	NA	NA	NA	NA	NA	NA	3-dehydroquinate dehydratase-2	KO:K03786	Bacteria;Proteobacteria;Betaproteobacteria;Burkholderiales;Oxalobacteraceae;Noviherbaspirillum;Noviherbaspirillum denitrificans;Noviherbaspirillum denitrificans TSA40	EC:4.2.1.10	KO:K03786	Ga0394449_00595	k141_604	Noviherbaspirillum sp. BP10	2831285802	MEGAHIT-QMFCE002AF.10.fa
Ga0394449_00595_44914_45381	253.726	-9.5774	1.97298	-4.85428	1.20826e-06	3.57238e-06	DE	NA	NA	NA	NA	NA	NA	NA	NA	0	0	acetyl-CoA carboxylase biotin carboxyl carrier protein	KO:K02160	Bacteria;Proteobacteria;Betaproteobacteria;Burkholderiales;Oxalobacteraceae;Noviherbaspirillum;Noviherbaspirillum denitrificans;Noviherbaspirillum denitrificans TSA40	NA	KO:K02160	Ga0394449_00595	k141_604	Noviherbaspirillum sp. BP10	2831285802	MEGAHIT-QMFCE002AF.10.fa
Ga0394449_00595_45460_46839	357.074	-10.2869	2.30199	-4.46869	7.86997e-06	2.12072e-05	DE	NA	24.0574	NA	NA	NA	NA	NA	24.0574	0	3	acetyl-CoA carboxylase biotin carboxylase subunit	KO:K01961	Bacteria;Proteobacteria;Betaproteobacteria;Burkholderiales;Oxalobacteraceae;Noviherbaspirillum;Noviherbaspirillum denitrificans;Noviherbaspirillum denitrificans TSA40	EC:6.3.4.14,EC:6.4.1.2	KO:K01961	Ga0394449_00595	k141_604	Noviherbaspirillum sp. BP10	2831285802	MEGAHIT-QMFCE002AF.10.fa
Ga0394449_00595_46853_47764	173.634	-9.11622	2.38575	-3.82112	0.000132848	0.000306545	DE	NA	NA	NA	NA	NA	NA	NA	NA	NA	NA	ribosomal protein L11 methyltransferase	KO:K02687	Bacteria;Proteobacteria;Betaproteobacteria;Burkholderiales;Oxalobacteraceae;Noviherbaspirillum;Noviherbaspirillum sp. Root189;Noviherbaspirillum sp. Root189	EC:2.1.1.-	KO:K02687	Ga0394449_00595	k141_604	Noviherbaspirillum sp. BP10	2831285802	MEGAHIT-QMFCE002AF.10.fa
Ga0394449_00595_47771_48889	162.521	-9.03356	2.01199	-4.48987	7.1266e-06	1.9299e-05	DE	NA	NA	NA	NA	NA	NA	NA	NA	NA	NA	predicted Zn finger-like uncharacterized protein	TIGR02098	Bacteria;Proteobacteria;Betaproteobacteria;Burkholderiales;Oxalobacteraceae;Noviherbaspirillum;Noviherbaspirillum denitrificans;Noviherbaspirillum denitrificans TSA40	NA	NA	Ga0394449_00595	k141_604	Noviherbaspirillum sp. BP10	2831285802	MEGAHIT-QMFCE002AF.10.fa
Ga0394449_00595_48968_49900	233.42	-6.57062	1.47003	-4.46973	7.83169e-06	2.11155e-05	DE	NA	NA	NA	NA	NA	NA	NA	NA	0	0	adenosine kinase	KO:K00856	Bacteria;Proteobacteria;Betaproteobacteria;Burkholderiales;Oxalobacteraceae;Noviherbaspirillum;Noviherbaspirillum denitrificans;Noviherbaspirillum denitrificans TSA40	EC:2.7.1.20	KO:K00856	Ga0394449_00595	k141_604	Noviherbaspirillum sp. BP10	2831285802	MEGAHIT-QMFCE002AF.10.fa
Ga0394449_00595_49939_50400	187.069	-7.04253	2.80169	-2.51367	NA	NA	not_DE	NA	NA	NA	NA	NA	NA	NA	NA	0	0	outer membrane lipoprotein SlyB	KO:K06077	Bacteria;Proteobacteria;Betaproteobacteria;Burkholderiales;Oxalobacteraceae;Noviherbaspirillum;Noviherbaspirillum sp. Root189;Noviherbaspirillum sp. Root189	NA	KO:K06077	Ga0394449_00595	k141_604	Noviherbaspirillum sp. BP10	2831285802	MEGAHIT-QMFCE002AF.10.fa
Ga0394449_00595_50409_50717	162.842	-13.0895	1.86422	-7.02142	2.19627e-12	1.32629e-11	DE	NA	NA	NA	NA	NA	NA	NA	NA	NA	NA	hypothetical protein	KO:K09131	Bacteria;Proteobacteria;Betaproteobacteria;Burkholderiales;Oxalobacteraceae;Noviherbaspirillum;Noviherbaspirillum denitrificans;Noviherbaspirillum denitrificans TSA40	NA	KO:K09131	Ga0394449_00595	k141_604	Noviherbaspirillum sp. BP10	2831285802	MEGAHIT-QMFCE002AF.10.fa
Ga0394449_00595_50714_51256	181.656	-9.25409	1.97797	-4.67858	2.88863e-06	8.18263e-06	DE	NA	NA	NA	NA	NA	NA	NA	NA	NA	NA	YggT family protein	KO:K02221	Bacteria;Proteobacteria;Betaproteobacteria;Burkholderiales;Oxalobacteraceae;Noviherbaspirillum;Noviherbaspirillum denitrificans;Noviherbaspirillum denitrificans TSA40	NA	KO:K02221	Ga0394449_00595	k141_604	Noviherbaspirillum sp. BP10	2831285802	MEGAHIT-QMFCE002AF.10.fa
Ga0394449_00595_51352_51822	146.966	-4.52987	1.5437	-2.93442	0.00334172	0.00617338	DE	NA	NA	NA	NA	NA	NA	NA	NA	NA	NA	histone H1/5	KO:K11275	Bacteria;Proteobacteria;Betaproteobacteria;Burkholderiales;Oxalobacteraceae;Herbaspirillum;Herbaspirillum sp. meg3;Herbaspirillum sp. meg3	NA	KO:K11275	Ga0394449_00595	k141_604	Noviherbaspirillum sp. BP10	2831285802	MEGAHIT-QMFCE002AF.10.fa
Ga0394449_00595_5279_6199	545.561	-12.1677	1.76469	-6.8951	5.38261e-12	3.00838e-11	DE	NA	NA	NA	NA	NA	NA	NA	NA	NA	NA	nucleoside-diphosphate-sugar epimerase	COG0451	Bacteria;Proteobacteria;Betaproteobacteria;Burkholderiales;Oxalobacteraceae;Noviherbaspirillum;Noviherbaspirillum denitrificans;Noviherbaspirillum denitrificans TSA40	NA	NA	Ga0394449_00595	k141_604	Noviherbaspirillum sp. BP10	2831285802	MEGAHIT-QMFCE002AF.10.fa
Ga0394449_00595_7342_8139	1103.79	-11.2466	2.0515	-5.48211	4.20272e-08	1.47783e-07	DE	NA	NA	NA	NA	NA	NA	NA	NA	NA	NA	lipopolysaccharide transport system permease protein	KO:K09690	Bacteria;Proteobacteria;Betaproteobacteria;Burkholderiales;Oxalobacteraceae;Noviherbaspirillum;Noviherbaspirillum sp. Root189;Noviherbaspirillum sp. Root189	NA	KO:K09690	Ga0394449_00595	k141_604	Noviherbaspirillum sp. BP10	2831285802	MEGAHIT-QMFCE002AF.10.fa
Ga0394449_00595_8139_9548	475.958	-5.32716	1.58977	-3.35091	0.000805472	0.00162553	DE	NA	NA	NA	NA	NA	NA	NA	NA	NA	NA	mannose-1-phosphate guanylyltransferase/mannose-6-phosphate isomerase	TIGR01479	Bacteria;Proteobacteria;Betaproteobacteria;Burkholderiales;Oxalobacteraceae;Noviherbaspirillum;Noviherbaspirillum sp. Root189;Noviherbaspirillum sp. Root189	NA	NA	Ga0394449_00595	k141_604	Noviherbaspirillum sp. BP10	2831285802	MEGAHIT-QMFCE002AF.10.fa
Ga0394449_00595_9628_10509	158.062	-11.106	1.81852	-6.10718	1.01407e-09	4.23732e-09	DE	NA	NA	NA	NA	NA	NA	NA	NA	NA	NA	dTDP-4-dehydrorhamnose reductase	KO:K00067	Bacteria;Proteobacteria;Betaproteobacteria;Burkholderiales;Oxalobacteraceae;Noviherbaspirillum;Noviherbaspirillum denitrificans;Noviherbaspirillum denitrificans TSA40	EC:1.1.1.133	KO:K00067	Ga0394449_00595	k141_604	Noviherbaspirillum sp. BP10	2831285802	MEGAHIT-QMFCE002AF.10.fa
Ga0394449_00731_100363_100662	3.73956	-7.37779	3.48644	-2.11614	0.0343331	0.0485494	DE	NA	NA	NA	NA	NA	NA	NA	NA	NA	NA	hypothetical protein	Hypo-rule applied	Bacteria;Proteobacteria;Betaproteobacteria;Burkholderiales;Oxalobacteraceae;Noviherbaspirillum;Noviherbaspirillum autotrophicum;Noviherbaspirillum autotrophicum TSA66	NA	NA	Ga0394449_00731	k141_740	Noviherbaspirillum sp. BP10	2831285802	MEGAHIT-QMFCE002AF.10.fa
Ga0394449_00731_100659_101024	659.639	-15.0963	1.8877	-7.99717	1.27311e-15	1.1317e-14	DE	NA	NA	NA	NA	NA	NA	NA	NA	NA	NA	uncharacterized membrane protein YqjE	COG5393	Bacteria;Proteobacteria;Betaproteobacteria;Burkholderiales;Oxalobacteraceae;Noviherbaspirillum;Noviherbaspirillum autotrophicum;Noviherbaspirillum autotrophicum TSA66	NA	NA	Ga0394449_00731	k141_740	Noviherbaspirillum sp. BP10	2831285802	MEGAHIT-QMFCE002AF.10.fa
Ga0394449_00731_101029_101343	435.654	-10.6806	1.90221	-5.61483	1.96761e-08	7.15642e-08	DE	NA	27.8049	NA	NA	NA	NA	27.8049	NA	3	0	ElaB/YqjD/DUF883 family membrane-anchored ribosome-binding protein	COG4575	Bacteria;Proteobacteria;Betaproteobacteria;Burkholderiales;Oxalobacteraceae;Noviherbaspirillum;Noviherbaspirillum denitrificans;Noviherbaspirillum denitrificans TSA40	NA	NA	Ga0394449_00731	k141_740	Noviherbaspirillum sp. BP10	2831285802	MEGAHIT-QMFCE002AF.10.fa
Ga0394449_00731_10124_10675	432.292	-14.376	2.18932	-6.56641	5.15422e-11	2.51629e-10	DE	NA	NA	NA	NA	NA	NA	NA	NA	NA	NA	hypothetical protein	Hypo-rule applied	Bacteria;Proteobacteria;Betaproteobacteria;Burkholderiales;Oxalobacteraceae;Noviherbaspirillum;Noviherbaspirillum denitrificans;Noviherbaspirillum denitrificans TSA40	NA	NA	Ga0394449_00731	k141_740	Noviherbaspirillum sp. BP10	2831285802	MEGAHIT-QMFCE002AF.10.fa
Ga0394449_00731_101436_102290	67.4464	-10.8722	1.70798	-6.36553	1.94611e-10	8.77247e-10	DE	NA	NA	NA	NA	NA	NA	NA	NA	NA	NA	4-hydroxybenzoate polyprenyltransferase	KO:K03179	Bacteria;Proteobacteria;Betaproteobacteria;Burkholderiales;Oxalobacteraceae;Noviherbaspirillum;Noviherbaspirillum autotrophicum;Noviherbaspirillum autotrophicum TSA66	EC:2.5.1.39	KO:K03179	Ga0394449_00731	k141_740	Noviherbaspirillum sp. BP10	2831285802	MEGAHIT-QMFCE002AF.10.fa
Ga0394449_00731_102490_103800	143.194	-11.2761	1.8507	-6.09289	1.10889e-09	4.61412e-09	DE	NA	NA	NA	NA	NA	NA	NA	NA	NA	NA	sn-glycerol 3-phosphate transport system substrate-binding protein	KO:K05813	Bacteria;Proteobacteria;Betaproteobacteria;Burkholderiales;Oxalobacteraceae;Noviherbaspirillum;Noviherbaspirillum sp. Root189;Noviherbaspirillum sp. Root189	NA	KO:K05813	Ga0394449_00731	k141_740	Noviherbaspirillum sp. BP10	2831285802	MEGAHIT-QMFCE002AF.10.fa
Ga0394449_00731_103852_104808	198.148	-7.85103	1.54239	-5.09016	3.57757e-07	1.12408e-06	DE	NA	NA	NA	NA	NA	NA	NA	NA	NA	NA	LysR family hydrogen peroxide-inducible transcriptional activator	KO:K04761	Bacteria;Proteobacteria;Betaproteobacteria;Burkholderiales;Oxalobacteraceae;Noviherbaspirillum;Noviherbaspirillum autotrophicum;Noviherbaspirillum autotrophicum TSA66	NA	KO:K04761	Ga0394449_00731	k141_740	Noviherbaspirillum sp. BP10	2831285802	MEGAHIT-QMFCE002AF.10.fa
Ga0394449_00731_104892_106973	99.6855	-8.26763	2.12675	-3.88744	0.000101306	0.000238328	DE	NA	NA	NA	NA	NA	NA	NA	NA	NA	NA	ATP-dependent DNA helicase RecG	KO:K03655	Bacteria;Proteobacteria;Betaproteobacteria;Burkholderiales;Oxalobacteraceae;Noviherbaspirillum;Noviherbaspirillum sp. Root189;Noviherbaspirillum sp. Root189	EC:3.6.4.12	KO:K03655	Ga0394449_00731	k141_740	Noviherbaspirillum sp. BP10	2831285802	MEGAHIT-QMFCE002AF.10.fa
Ga0394449_00731_107183_108208	110.827	-8.77976	1.96808	-4.46108	8.15482e-06	2.19462e-05	DE	NA	NA	NA	NA	NA	NA	NA	NA	NA	NA	S-adenosylmethionine:tRNA ribosyltransferase-isomerase	KO:K07568	Bacteria;Proteobacteria;Betaproteobacteria;Burkholderiales;Oxalobacteraceae;Noviherbaspirillum;Noviherbaspirillum sp. Root189;Noviherbaspirillum sp. Root189	EC:2.4.99.17	KO:K07568	Ga0394449_00731	k141_740	Noviherbaspirillum sp. BP10	2831285802	MEGAHIT-QMFCE002AF.10.fa
Ga0394449_00731_10756_11646	57.4559	-11.2785	3.23261	-3.48897	0.000484893	0.00101734	DE	NA	NA	NA	NA	NA	NA	NA	NA	NA	NA	sugar lactone lactonase YvrE	COG3386	Bacteria;Proteobacteria;Betaproteobacteria;Burkholderiales;Oxalobacteraceae;Noviherbaspirillum;Noviherbaspirillum autotrophicum;Noviherbaspirillum autotrophicum TSA66	NA	NA	Ga0394449_00731	k141_740	Noviherbaspirillum sp. BP10	2831285802	MEGAHIT-QMFCE002AF.10.fa
Ga0394449_00731_108202_109329	280.451	-11.3643	1.82998	-6.21009	5.29548e-10	2.28411e-09	DE	NA	NA	NA	NA	NA	NA	NA	NA	NA	NA	queuine tRNA-ribosyltransferase	KO:K00773	Bacteria;Proteobacteria;Betaproteobacteria;Burkholderiales;Oxalobacteraceae;Noviherbaspirillum;Noviherbaspirillum denitrificans;Noviherbaspirillum denitrificans TSA40	EC:2.4.2.29	KO:K00773	Ga0394449_00731	k141_740	Noviherbaspirillum sp. BP10	2831285802	MEGAHIT-QMFCE002AF.10.fa
Ga0394449_00731_109441_109785	863.871	-4.67985	1.49292	-3.1347	0.00172031	0.00329755	DE	NA	28.3883	NA	NA	NA	NA	28.3883	NA	3	0	preprotein translocase subunit YajC	KO:K03210	Bacteria;Proteobacteria;Betaproteobacteria;Burkholderiales;Oxalobacteraceae;Noviherbaspirillum;Noviherbaspirillum denitrificans;Noviherbaspirillum denitrificans TSA40	NA	KO:K03210	Ga0394449_00731	k141_740	Noviherbaspirillum sp. BP10	2831285802	MEGAHIT-QMFCE002AF.10.fa
Ga0394449_00731_109865_111727	628.408	-8.18388	1.56843	-5.21788	1.80987e-07	5.89758e-07	DE	NA	NA	NA	NA	NA	NA	NA	NA	0	0	preprotein translocase subunit SecD	KO:K03072	Bacteria;Proteobacteria;Betaproteobacteria;Burkholderiales;Oxalobacteraceae;Noviherbaspirillum;Noviherbaspirillum autotrophicum;Noviherbaspirillum autotrophicum TSA66	NA	KO:K03072	Ga0394449_00731	k141_740	Noviherbaspirillum sp. BP10	2831285802	MEGAHIT-QMFCE002AF.10.fa
Ga0394449_00731_111823_112761	368.321	-10.1433	1.97788	-5.12835	2.92297e-07	9.27771e-07	DE	NA	NA	NA	NA	NA	NA	NA	NA	NA	NA	preprotein translocase subunit SecF	KO:K03074	Bacteria;Proteobacteria;Betaproteobacteria;Burkholderiales;Oxalobacteraceae;Noviherbaspirillum;Noviherbaspirillum autotrophicum;Noviherbaspirillum autotrophicum TSA66	NA	KO:K03074	Ga0394449_00731	k141_740	Noviherbaspirillum sp. BP10	2831285802	MEGAHIT-QMFCE002AF.10.fa
Ga0394449_00731_112788_113519	109.527	-9.67403	2.76245	-3.50198	0.000461816	0.000972195	DE	NA	NA	NA	NA	NA	NA	NA	NA	NA	NA	cytochrome b	COG3658	Bacteria;Proteobacteria;Betaproteobacteria;Burkholderiales;Oxalobacteraceae;Noviherbaspirillum;Noviherbaspirillum sp. Root189;Noviherbaspirillum sp. Root189	NA	NA	Ga0394449_00731	k141_740	Noviherbaspirillum sp. BP10	2831285802	MEGAHIT-QMFCE002AF.10.fa
Ga0394449_00731_113584_114120	103.155	-7.32193	3.10923	-2.3549	NA	NA	not_DE	NA	NA	NA	NA	NA	NA	NA	NA	NA	NA	cytochrome c556	COG3909	Bacteria;Proteobacteria;Betaproteobacteria;Burkholderiales;Oxalobacteraceae;Noviherbaspirillum;Noviherbaspirillum sp. Root189;Noviherbaspirillum sp. Root189	NA	NA	Ga0394449_00731	k141_740	Noviherbaspirillum sp. BP10	2831285802	MEGAHIT-QMFCE002AF.10.fa
Ga0394449_00731_114246_115613	785.725	-9.49314	2.13954	-4.437	9.12216e-06	2.43878e-05	DE	NA	23.3716	NA	NA	NA	NA	NA	23.3716	0	2	adenylosuccinate lyase	KO:K01756	Bacteria;Proteobacteria;Betaproteobacteria;Burkholderiales;Oxalobacteraceae;Noviherbaspirillum;Noviherbaspirillum autotrophicum;Noviherbaspirillum autotrophicum TSA66	EC:4.3.2.2	KO:K01756	Ga0394449_00731	k141_740	Noviherbaspirillum sp. BP10	2831285802	MEGAHIT-QMFCE002AF.10.fa
Ga0394449_00731_1153_2640	254.129	-6.72817	1.90065	-3.53993	0.000400236	0.000852171	DE	NA	NA	NA	NA	NA	NA	NA	NA	NA	NA	GntR family transcriptional regulator/MocR family aminotransferase	KO:K00375	Bacteria;Proteobacteria;Betaproteobacteria;Burkholderiales;Oxalobacteraceae;Noviherbaspirillum;Noviherbaspirillum autotrophicum;Noviherbaspirillum autotrophicum TSA66	NA	KO:K00375	Ga0394449_00731	k141_740	Noviherbaspirillum sp. BP10	2831285802	MEGAHIT-QMFCE002AF.10.fa
Ga0394449_00731_115822_116430	170.462	-6.14679	1.92151	-3.19894	0.00137936	0.00268081	DE	NA	24.3401	NA	NA	NA	NA	NA	24.3401	0	3	glutathione S-transferase	KO:K00799	Bacteria;Proteobacteria;Betaproteobacteria;Burkholderiales;Oxalobacteraceae;Noviherbaspirillum;Noviherbaspirillum sp. Root189;Noviherbaspirillum sp. Root189	EC:2.5.1.18	KO:K00799	Ga0394449_00731	k141_740	Noviherbaspirillum sp. BP10	2831285802	MEGAHIT-QMFCE002AF.10.fa
Ga0394449_00731_116497_116967	700.99	-9.84582	2.07422	-4.74675	2.06707e-06	5.95021e-06	DE	NA	NA	NA	NA	NA	NA	NA	NA	NA	NA	bacterioferritin	KO:K03594	Bacteria;Proteobacteria;Betaproteobacteria;Burkholderiales;Oxalobacteraceae;Noviherbaspirillum;Noviherbaspirillum autotrophicum;Noviherbaspirillum autotrophicum TSA66	EC:1.16.3.1	KO:K03594	Ga0394449_00731	k141_740	Noviherbaspirillum sp. BP10	2831285802	MEGAHIT-QMFCE002AF.10.fa
Ga0394449_00731_117229_117444	123.552	-6.08855	2.19298	-2.77638	0.00549675	0.00984511	DE	NA	NA	NA	NA	NA	NA	NA	NA	NA	NA	bacterioferritin-associated ferredoxin	KO:K02192	Bacteria;Proteobacteria;Betaproteobacteria;Burkholderiales;Oxalobacteraceae;Noviherbaspirillum;Noviherbaspirillum denitrificans;Noviherbaspirillum denitrificans TSA40	NA	KO:K02192	Ga0394449_00731	k141_740	Noviherbaspirillum sp. BP10	2831285802	MEGAHIT-QMFCE002AF.10.fa
Ga0394449_00731_117497_117664	224.556	-11.9673	2.84082	-4.21262	2.52422e-05	6.44938e-05	DE	NA	NA	NA	NA	NA	NA	NA	NA	NA	NA	hemin uptake protein HemP	COG4256	Bacteria;Proteobacteria;Betaproteobacteria;Burkholderiales;Oxalobacteraceae;Noviherbaspirillum;Noviherbaspirillum denitrificans;Noviherbaspirillum denitrificans TSA40	NA	NA	Ga0394449_00731	k141_740	Noviherbaspirillum sp. BP10	2831285802	MEGAHIT-QMFCE002AF.10.fa
Ga0394449_00731_11766_12626	52.969	-10.7044	2.03621	-5.25702	1.46404e-07	4.8297e-07	DE	NA	NA	NA	NA	NA	NA	NA	NA	NA	NA	2-hydroxy-3-oxopropionate reductase	KO:K00042	Bacteria;Proteobacteria;Betaproteobacteria;Burkholderiales;Oxalobacteraceae;Noviherbaspirillum;Noviherbaspirillum autotrophicum;Noviherbaspirillum autotrophicum TSA66	EC:1.1.1.60	KO:K00042	Ga0394449_00731	k141_740	Noviherbaspirillum sp. BP10	2831285802	MEGAHIT-QMFCE002AF.10.fa
Ga0394449_00731_117924_118490	184.24	-13.2354	1.93565	-6.8377	8.04757e-12	4.42498e-11	DE	NA	NA	NA	NA	NA	NA	NA	NA	NA	NA	membrane protein DedA with SNARE-associated domain	COG0586	Bacteria;Proteobacteria;Betaproteobacteria;Burkholderiales;Oxalobacteraceae;Noviherbaspirillum;Noviherbaspirillum denitrificans;Noviherbaspirillum denitrificans TSA40	NA	NA	Ga0394449_00731	k141_740	Noviherbaspirillum sp. BP10	2831285802	MEGAHIT-QMFCE002AF.10.fa
Ga0394449_00731_118553_120058	342.102	-12.1363	1.6917	-7.17403	7.28211e-13	4.74688e-12	DE	NA	NA	NA	NA	NA	NA	NA	NA	NA	NA	hypothetical protein	Hypo-rule applied	Bacteria;Proteobacteria;Betaproteobacteria;Burkholderiales;Oxalobacteraceae;Noviherbaspirillum;Noviherbaspirillum autotrophicum;Noviherbaspirillum autotrophicum TSA66	NA	NA	Ga0394449_00731	k141_740	Noviherbaspirillum sp. BP10	2831285802	MEGAHIT-QMFCE002AF.10.fa
Ga0394449_00731_120248_121036	176.16	-11.4612	1.82331	-6.28595	3.25851e-10	1.43802e-09	DE	NA	NA	NA	NA	NA	NA	NA	NA	NA	NA	hypothetical protein	Hypo-rule applied	Bacteria;Proteobacteria;Betaproteobacteria;Burkholderiales;Burkholderiaceae;Paraburkholderia;Paraburkholderia tuberum;Paraburkholderia tuberum WSM4176	NA	NA	Ga0394449_00731	k141_740	Noviherbaspirillum sp. BP10	2831285802	MEGAHIT-QMFCE002AF.10.fa
Ga0394449_00731_121108_122154	271.534	-8.7208	2.06602	-4.22106	2.43157e-05	6.22332e-05	DE	NA	29.5536	NA	NA	NA	NA	29.5536	NA	3	0	hypothetical protein	Hypo-rule applied	Bacteria;Proteobacteria;Betaproteobacteria;Burkholderiales;Burkholderiaceae;Burkholderia;Burkholderia sp. H160;Burkholderia sp. H160	NA	NA	Ga0394449_00731	k141_740	Noviherbaspirillum sp. BP10	2831285802	MEGAHIT-QMFCE002AF.10.fa
Ga0394449_00731_122289_123401	229.829	-10.1338	1.85293	-5.46906	4.52432e-08	1.5842e-07	DE	NA	NA	NA	NA	NA	NA	NA	NA	NA	NA	tRNA-specific 2-thiouridylase	KO:K00566	Bacteria;Proteobacteria;Betaproteobacteria;Burkholderiales;Oxalobacteraceae;Noviherbaspirillum;Noviherbaspirillum sp. Root189;Noviherbaspirillum sp. Root189	EC:2.8.1.-	KO:K00566	Ga0394449_00731	k141_740	Noviherbaspirillum sp. BP10	2831285802	MEGAHIT-QMFCE002AF.10.fa
Ga0394449_00731_123394_124098	109.232	-9.44502	2.07086	-4.56092	5.09298e-06	1.40123e-05	DE	NA	NA	NA	NA	NA	NA	NA	NA	NA	NA	8-oxo-dGTP pyrophosphatase MutT (NUDIX family)	COG0494	Bacteria;Proteobacteria;Betaproteobacteria;Burkholderiales;Oxalobacteraceae;Noviherbaspirillum;Noviherbaspirillum autotrophicum;Noviherbaspirillum autotrophicum TSA66	NA	NA	Ga0394449_00731	k141_740	Noviherbaspirillum sp. BP10	2831285802	MEGAHIT-QMFCE002AF.10.fa
Ga0394449_00731_124375_124743	344.05	-5.2867	1.68583	-3.13596	0.00171292	0.00328506	DE	NA	NA	NA	NA	NA	NA	NA	NA	NA	NA	aspartate 1-decarboxylase	KO:K01579	Bacteria;Proteobacteria;Betaproteobacteria;Burkholderiales;Oxalobacteraceae;Noviherbaspirillum;Noviherbaspirillum autotrophicum;Noviherbaspirillum autotrophicum TSA66	EC:4.1.1.11	KO:K01579	Ga0394449_00731	k141_740	Noviherbaspirillum sp. BP10	2831285802	MEGAHIT-QMFCE002AF.10.fa
Ga0394449_00731_126458_127879	174.524	-9.27271	1.9328	-4.79756	1.60609e-06	4.68189e-06	DE	NA	NA	NA	NA	NA	NA	NA	NA	NA	NA	NAD(P) transhydrogenase subunit beta	KO:K00325	Bacteria;Proteobacteria;Betaproteobacteria;Burkholderiales;Oxalobacteraceae;Noviherbaspirillum;Noviherbaspirillum autotrophicum;Noviherbaspirillum autotrophicum TSA66	EC:1.6.1.2	KO:K00325	Ga0394449_00731	k141_740	Noviherbaspirillum sp. BP10	2831285802	MEGAHIT-QMFCE002AF.10.fa
Ga0394449_00731_12715_14511	196.609	-8.75248	2.27793	-3.8423	0.000121885	0.000283305	DE	NA	NA	NA	NA	NA	NA	NA	NA	NA	NA	putative ATP-binding cassette transporter	KO:K02471	Bacteria;Proteobacteria;Betaproteobacteria;Burkholderiales;Oxalobacteraceae;Noviherbaspirillum;Noviherbaspirillum massiliense;Noviherbaspirillum massiliense JC206	NA	KO:K02471	Ga0394449_00731	k141_740	Noviherbaspirillum sp. BP10	2831285802	MEGAHIT-QMFCE002AF.10.fa
Ga0394449_00731_127929_129071	151.243	-10.9378	2.08308	-5.25078	1.5146e-07	4.99097e-07	DE	NA	NA	NA	NA	NA	NA	NA	NA	NA	NA	2-octaprenyl-6-methoxyphenol hydroxylase	KO:K03185	Bacteria;Proteobacteria;Betaproteobacteria;Burkholderiales;Oxalobacteraceae;Noviherbaspirillum;Noviherbaspirillum autotrophicum;Noviherbaspirillum autotrophicum TSA66	EC:1.14.13.-	KO:K03185	Ga0394449_00731	k141_740	Noviherbaspirillum sp. BP10	2831285802	MEGAHIT-QMFCE002AF.10.fa
Ga0394449_00731_129076_130374	417.46	-11.5637	2.03117	-5.69313	1.24728e-08	4.67074e-08	DE	NA	NA	NA	NA	NA	NA	NA	NA	NA	NA	Xaa-Pro aminopeptidase	KO:K01262	Bacteria;Proteobacteria;Betaproteobacteria;Burkholderiales;Oxalobacteraceae;Noviherbaspirillum;Noviherbaspirillum sp. Root189;Noviherbaspirillum sp. Root189	EC:3.4.11.9	KO:K01262	Ga0394449_00731	k141_740	Noviherbaspirillum sp. BP10	2831285802	MEGAHIT-QMFCE002AF.10.fa
Ga0394449_00731_130428_131123	180.231	-13.1403	2.10069	-6.25524	3.96902e-10	1.7372e-09	DE	NA	NA	NA	NA	NA	NA	NA	NA	NA	NA	MurNAc alpha-1-phosphate uridylyltransferase	KO:K00992	Bacteria;Proteobacteria;Betaproteobacteria;Burkholderiales;Oxalobacteraceae;Noviherbaspirillum;Noviherbaspirillum denitrificans;Noviherbaspirillum denitrificans TSA40	EC:2.7.7.-	KO:K00992	Ga0394449_00731	k141_740	Noviherbaspirillum sp. BP10	2831285802	MEGAHIT-QMFCE002AF.10.fa
Ga0394449_00731_131154_132179	283.129	-9.788	1.94689	-5.0275	4.96928e-07	1.53678e-06	DE	NA	NA	NA	NA	NA	NA	NA	NA	NA	NA	hypothetical protein	KO:K07102	Bacteria;Proteobacteria;Betaproteobacteria;Burkholderiales;Oxalobacteraceae;Noviherbaspirillum;Noviherbaspirillum autotrophicum;Noviherbaspirillum autotrophicum TSA66	EC:2.7.1.-	KO:K07102	Ga0394449_00731	k141_740	Noviherbaspirillum sp. BP10	2831285802	MEGAHIT-QMFCE002AF.10.fa
Ga0394449_00731_132264_134465	294.15	-6.64851	1.53871	-4.32084	1.55434e-05	4.06382e-05	DE	NA	NA	NA	NA	NA	NA	NA	NA	NA	NA	LPS-assembly protein	KO:K04744	Bacteria;Proteobacteria;Betaproteobacteria;Burkholderiales;Oxalobacteraceae;Noviherbaspirillum;Noviherbaspirillum denitrificans;Noviherbaspirillum denitrificans TSA40	NA	KO:K04744	Ga0394449_00731	k141_740	Noviherbaspirillum sp. BP10	2831285802	MEGAHIT-QMFCE002AF.10.fa
Ga0394449_00731_134472_135875	221.35	-7.64592	1.53139	-4.99279	5.95142e-07	1.82802e-06	DE	NA	NA	NA	NA	NA	NA	NA	NA	0	0	peptidyl-prolyl cis-trans isomerase SurA	KO:K03771	Bacteria;Proteobacteria;Betaproteobacteria;Burkholderiales;Oxalobacteraceae;Noviherbaspirillum;Noviherbaspirillum autotrophicum;Noviherbaspirillum autotrophicum TSA66	EC:5.2.1.8	KO:K03771	Ga0394449_00731	k141_740	Noviherbaspirillum sp. BP10	2831285802	MEGAHIT-QMFCE002AF.10.fa
Ga0394449_00731_135882_136910	92.0402	-9.38275	2.86158	-3.27887	0.00104224	0.00206458	DE	NA	NA	NA	NA	NA	NA	NA	NA	NA	NA	4-hydroxythreonine-4-phosphate dehydrogenase	KO:K00097	Bacteria;Proteobacteria;Betaproteobacteria;Burkholderiales;Oxalobacteraceae;Noviherbaspirillum;Noviherbaspirillum denitrificans;Noviherbaspirillum denitrificans TSA40	EC:1.1.1.262	KO:K00097	Ga0394449_00731	k141_740	Noviherbaspirillum sp. BP10	2831285802	MEGAHIT-QMFCE002AF.10.fa
Ga0394449_00731_136907_137677	55.0115	-8.68496	2.5735	-3.37476	0.000738796	0.00150111	DE	NA	NA	NA	NA	NA	NA	NA	NA	NA	NA	16S rRNA (adenine1518-N6/adenine1519-N6)-dimethyltransferase	KO:K02528	Bacteria;Proteobacteria;Betaproteobacteria;Burkholderiales;Oxalobacteraceae;Noviherbaspirillum;Noviherbaspirillum sp. Root189;Noviherbaspirillum sp. Root189	EC:2.1.1.182	KO:K02528	Ga0394449_00731	k141_740	Noviherbaspirillum sp. BP10	2831285802	MEGAHIT-QMFCE002AF.10.fa
Ga0394449_00731_137777_138358	43.9899	-10.8918	3.23346	-3.36847	0.000755855	0.00153244	DE	NA	NA	NA	NA	NA	NA	NA	NA	NA	NA	chromate transporter	KO:K07240	Bacteria;Proteobacteria;Betaproteobacteria;Burkholderiales;Oxalobacteraceae;Noviherbaspirillum;Noviherbaspirillum denitrificans;Noviherbaspirillum denitrificans TSA40	NA	KO:K07240	Ga0394449_00731	k141_740	Noviherbaspirillum sp. BP10	2831285802	MEGAHIT-QMFCE002AF.10.fa
Ga0394449_00731_138355_138930	113.798	-12.3856	2.44285	-5.07015	3.97499e-07	1.24189e-06	DE	NA	NA	NA	NA	NA	NA	NA	NA	NA	NA	chromate transporter	KO:K07240	Bacteria;Proteobacteria;Betaproteobacteria;Burkholderiales;Oxalobacteraceae;Noviherbaspirillum;Noviherbaspirillum denitrificans;Noviherbaspirillum denitrificans TSA40	NA	KO:K07240	Ga0394449_00731	k141_740	Noviherbaspirillum sp. BP10	2831285802	MEGAHIT-QMFCE002AF.10.fa
Ga0394449_00731_138947_139318	15.6654	-5.09	2.74972	-1.8511	0.0641551	0.082644	not_DE	NA	NA	NA	NA	NA	NA	NA	NA	NA	NA	lactoylglutathione lyase	KO:K01759	Bacteria;Proteobacteria;Betaproteobacteria;Burkholderiales;Oxalobacteraceae;Noviherbaspirillum;Noviherbaspirillum autotrophicum;Noviherbaspirillum autotrophicum TSA66	EC:4.4.1.5	KO:K01759	Ga0394449_00731	k141_740	Noviherbaspirillum sp. BP10	2831285802	MEGAHIT-QMFCE002AF.10.fa
Ga0394449_00731_139356_140279	167.224	-9.18559	1.98866	-4.61898	3.85631e-06	1.07645e-05	DE	NA	NA	NA	NA	NA	NA	NA	NA	NA	NA	hypothetical protein	KO:K07043	Bacteria;Proteobacteria;Betaproteobacteria;Burkholderiales;Oxalobacteraceae;Noviherbaspirillum;Noviherbaspirillum sp. Root189;Noviherbaspirillum sp. Root189	NA	KO:K07043	Ga0394449_00731	k141_740	Noviherbaspirillum sp. BP10	2831285802	MEGAHIT-QMFCE002AF.10.fa
Ga0394449_00731_140251_141036	404.947	-9.38978	1.64891	-5.69455	1.23698e-08	4.63565e-08	DE	NA	NA	NA	NA	NA	NA	NA	NA	NA	NA	1-acyl-sn-glycerol-3-phosphate acyltransferase	KO:K00655	Bacteria;Proteobacteria;Betaproteobacteria;Burkholderiales;Oxalobacteraceae;Noviherbaspirillum;Noviherbaspirillum denitrificans;Noviherbaspirillum denitrificans TSA40	EC:2.3.1.51	KO:K00655	Ga0394449_00731	k141_740	Noviherbaspirillum sp. BP10	2831285802	MEGAHIT-QMFCE002AF.10.fa
Ga0394449_00731_141075_141635	102.272	-10.3664	2.99192	-3.4648	NA	NA	not_DE	NA	NA	NA	NA	NA	NA	NA	NA	NA	NA	D-glycero-D-manno-heptose 1,7-bisphosphate phosphatase	KO:K03273	Bacteria;Proteobacteria;Betaproteobacteria;Burkholderiales;Oxalobacteraceae;Noviherbaspirillum;Noviherbaspirillum autotrophicum;Noviherbaspirillum autotrophicum TSA66	EC:3.1.3.82,EC:3.1.3.83	KO:K03273	Ga0394449_00731	k141_740	Noviherbaspirillum sp. BP10	2831285802	MEGAHIT-QMFCE002AF.10.fa
Ga0394449_00731_141671_143755	275.915	-6.63403	1.3523	-4.90576	9.30676e-07	2.79259e-06	DE	NA	NA	NA	NA	NA	NA	NA	NA	NA	NA	glycyl-tRNA synthetase beta chain	KO:K01879	Bacteria;Proteobacteria;Betaproteobacteria;Burkholderiales;Oxalobacteraceae;Noviherbaspirillum;Noviherbaspirillum denitrificans;Noviherbaspirillum denitrificans TSA40	EC:6.1.1.14	KO:K01879	Ga0394449_00731	k141_740	Noviherbaspirillum sp. BP10	2831285802	MEGAHIT-QMFCE002AF.10.fa
Ga0394449_00731_143914_144825	545.945	-10.3125	2.00993	-5.13077	2.88565e-07	9.16899e-07	DE	NA	NA	NA	NA	NA	NA	NA	NA	NA	NA	glycyl-tRNA synthetase alpha chain	KO:K01878	Bacteria;Proteobacteria;Betaproteobacteria;Burkholderiales;Oxalobacteraceae;Noviherbaspirillum;Noviherbaspirillum autotrophicum;Noviherbaspirillum autotrophicum TSA66	EC:6.1.1.14	KO:K01878	Ga0394449_00731	k141_740	Noviherbaspirillum sp. BP10	2831285802	MEGAHIT-QMFCE002AF.10.fa
Ga0394449_00731_144896_146455	199.018	-10.1216	1.96867	-5.14133	2.72797e-07	8.69945e-07	DE	NA	NA	NA	NA	NA	NA	NA	NA	NA	NA	apolipoprotein N-acyltransferase	KO:K03820	Bacteria;Proteobacteria;Betaproteobacteria;Burkholderiales;Oxalobacteraceae;Noviherbaspirillum;Noviherbaspirillum autotrophicum;Noviherbaspirillum autotrophicum TSA66	EC:2.3.1.-	KO:K03820	Ga0394449_00731	k141_740	Noviherbaspirillum sp. BP10	2831285802	MEGAHIT-QMFCE002AF.10.fa
Ga0394449_00731_14569_15375	219.976	-9.00337	2.04331	-4.40626	NA	NA	not_DE	NA	NA	NA	NA	NA	NA	NA	NA	NA	NA	hypothetical protein	Hypo-rule applied	Bacteria;Proteobacteria;Betaproteobacteria;Burkholderiales;Oxalobacteraceae;Noviherbaspirillum;Noviherbaspirillum denitrificans;Noviherbaspirillum denitrificans TSA40	NA	NA	Ga0394449_00731	k141_740	Noviherbaspirillum sp. BP10	2831285802	MEGAHIT-QMFCE002AF.10.fa
Ga0394449_00731_146557_147444	337.512	-9.69166	2.11704	-4.57793	4.69607e-06	1.298e-05	DE	NA	NA	NA	NA	NA	NA	NA	NA	NA	NA	magnesium and cobalt transporter	KO:K06189	Bacteria;Proteobacteria;Betaproteobacteria;Burkholderiales;Oxalobacteraceae;Noviherbaspirillum;Noviherbaspirillum denitrificans;Noviherbaspirillum denitrificans TSA40	NA	KO:K06189	Ga0394449_00731	k141_740	Noviherbaspirillum sp. BP10	2831285802	MEGAHIT-QMFCE002AF.10.fa
Ga0394449_00731_147541_147993	137.372	-8.54349	2.08923	-4.08931	4.32662e-05	0.000107278	DE	NA	NA	NA	NA	NA	NA	NA	NA	NA	NA	probable rRNA maturation factor	KO:K07042	Bacteria;Proteobacteria;Betaproteobacteria;Burkholderiales;Oxalobacteraceae;Noviherbaspirillum;Noviherbaspirillum autotrophicum;Noviherbaspirillum autotrophicum TSA66	NA	KO:K07042	Ga0394449_00731	k141_740	Noviherbaspirillum sp. BP10	2831285802	MEGAHIT-QMFCE002AF.10.fa
Ga0394449_00731_147977_148993	343.519	-10.3325	2.07154	-4.98785	6.1055e-07	1.87188e-06	DE	NA	NA	NA	NA	NA	NA	NA	NA	NA	NA	phosphate starvation-inducible PhoH-like protein	KO:K06217	Bacteria;Proteobacteria;Betaproteobacteria;Burkholderiales;Oxalobacteraceae;Noviherbaspirillum;Noviherbaspirillum denitrificans;Noviherbaspirillum denitrificans TSA40	NA	KO:K06217	Ga0394449_00731	k141_740	Noviherbaspirillum sp. BP10	2831285802	MEGAHIT-QMFCE002AF.10.fa
Ga0394449_00731_149018_150358	902.788	-7.37895	1.46754	-5.02812	4.95313e-07	1.53211e-06	DE	NA	NA	NA	NA	NA	NA	NA	NA	NA	NA	tRNA-2-methylthio-N6-dimethylallyladenosine synthase	KO:K06168	Bacteria;Proteobacteria;Betaproteobacteria;Burkholderiales;Oxalobacteraceae;Noviherbaspirillum;Noviherbaspirillum autotrophicum;Noviherbaspirillum autotrophicum TSA66	EC:2.8.4.3	KO:K06168	Ga0394449_00731	k141_740	Noviherbaspirillum sp. BP10	2831285802	MEGAHIT-QMFCE002AF.10.fa
Ga0394449_00731_150362_150679	1057.8	-6.54307	1.65278	-3.95883	7.53164e-05	0.000180919	DE	NA	NA	NA	NA	NA	NA	NA	NA	NA	NA	hypothetical protein	Hypo-rule applied	Bacteria;Proteobacteria;Betaproteobacteria;Burkholderiales;Oxalobacteraceae;Noviherbaspirillum;Noviherbaspirillum denitrificans;Noviherbaspirillum denitrificans TSA40	NA	NA	Ga0394449_00731	k141_740	Noviherbaspirillum sp. BP10	2831285802	MEGAHIT-QMFCE002AF.10.fa
Ga0394449_00731_150796_150996	23.704	-10.2326	2.1129	-4.84293	1.27939e-06	3.7709e-06	DE	NA	NA	NA	NA	NA	NA	NA	NA	NA	NA	hypothetical protein	Hypo-rule applied	NA	NA	NA	Ga0394449_00731	k141_740	Noviherbaspirillum sp. BP10	2831285802	MEGAHIT-QMFCE002AF.10.fa
Ga0394449_00731_150982_151428	60.3064	-8.47347	2.76004	-3.07005	0.00214022	0.00405199	DE	NA	NA	NA	NA	NA	NA	NA	NA	NA	NA	curli production assembly/transport component CsgE	KO:K04337	Bacteria;Proteobacteria;Betaproteobacteria;Burkholderiales;Oxalobacteraceae;Noviherbaspirillum;Noviherbaspirillum sp. Root189;Noviherbaspirillum sp. Root189	NA	KO:K04337	Ga0394449_00731	k141_740	Noviherbaspirillum sp. BP10	2831285802	MEGAHIT-QMFCE002AF.10.fa
Ga0394449_00731_151443_151895	235.34	-13.3153	3.20517	-4.15432	3.26256e-05	8.22886e-05	DE	NA	NA	NA	NA	NA	NA	NA	NA	NA	NA	curli production assembly/transport component CsgF	KO:K04338	Bacteria;Proteobacteria;Betaproteobacteria;Burkholderiales;Oxalobacteraceae;Noviherbaspirillum;Noviherbaspirillum sp. Root189;Noviherbaspirillum sp. Root189	NA	KO:K04338	Ga0394449_00731	k141_740	Noviherbaspirillum sp. BP10	2831285802	MEGAHIT-QMFCE002AF.10.fa
Ga0394449_00731_151892_152812	420.217	-13.4111	2.28679	-5.8646	4.50219e-09	1.75964e-08	DE	NA	23.6395	NA	NA	NA	NA	23.6395	NA	2	0	curli production assembly/transport component CsgG	KO:K06214	Bacteria;Proteobacteria;Betaproteobacteria;Burkholderiales;Oxalobacteraceae;Noviherbaspirillum;Noviherbaspirillum sp. Root189;Noviherbaspirillum sp. Root189	NA	KO:K06214	Ga0394449_00731	k141_740	Noviherbaspirillum sp. BP10	2831285802	MEGAHIT-QMFCE002AF.10.fa
Ga0394449_00731_152809_153315	117.38	-12.3139	3.18552	-3.86558	0.000110825	0.000259292	DE	NA	NA	NA	NA	NA	NA	NA	NA	NA	NA	minor curlin subunit	KO:K04335	Bacteria;Proteobacteria;Betaproteobacteria;Burkholderiales;Oxalobacteraceae;Noviherbaspirillum;Noviherbaspirillum sp. Root189;Noviherbaspirillum sp. Root189	NA	KO:K04335	Ga0394449_00731	k141_740	Noviherbaspirillum sp. BP10	2831285802	MEGAHIT-QMFCE002AF.10.fa
Ga0394449_00731_153368_155077	2306.76	-8.34831	1.57499	-5.30055	1.15451e-07	3.85113e-07	DE	NA	NA	NA	NA	NA	NA	NA	NA	NA	NA	hypothetical protein	Hypo-rule applied	Bacteria;Proteobacteria;Betaproteobacteria;Burkholderiales;Oxalobacteraceae;Noviherbaspirillum;Noviherbaspirillum sp. Root189;Noviherbaspirillum sp. Root189	NA	NA	Ga0394449_00731	k141_740	Noviherbaspirillum sp. BP10	2831285802	MEGAHIT-QMFCE002AF.10.fa
Ga0394449_00731_15404_16609	149.59	-10.5169	1.86967	-5.62503	1.8548e-08	6.76588e-08	DE	NA	NA	NA	NA	NA	NA	NA	NA	NA	NA	hippurate hydrolase	KO:K01451	Bacteria;Proteobacteria;Betaproteobacteria;Burkholderiales;Oxalobacteraceae;Noviherbaspirillum;Noviherbaspirillum sp. Root189;Noviherbaspirillum sp. Root189	EC:3.5.1.32	KO:K01451	Ga0394449_00731	k141_740	Noviherbaspirillum sp. BP10	2831285802	MEGAHIT-QMFCE002AF.10.fa
Ga0394449_00731_155154_155465	51.0493	-7.89872	1.93672	-4.07841	4.53454e-05	0.000112117	DE	NA	NA	NA	NA	NA	NA	NA	NA	NA	NA	hypothetical protein	Hypo-rule applied	NA	NA	NA	Ga0394449_00731	k141_740	Noviherbaspirillum sp. BP10	2831285802	MEGAHIT-QMFCE002AF.10.fa
Ga0394449_00731_155462_156169	72.2936	-11.4323	2.22909	-5.12867	2.9179e-07	9.2636e-07	DE	NA	NA	NA	NA	NA	NA	NA	NA	NA	NA	AcrR family transcriptional regulator	COG1309	Bacteria;Proteobacteria;Betaproteobacteria;Burkholderiales;unclassified Burkholderiales;unclassified Burkholderiales;[Polyangium] brachysporum;Polyangium brachysporum DSM 7029	NA	NA	Ga0394449_00731	k141_740	Noviherbaspirillum sp. BP10	2831285802	MEGAHIT-QMFCE002AF.10.fa
Ga0394449_00731_156207_157310	256.184	-13.6287	2.16316	-6.30035	2.9697e-10	1.31914e-09	DE	NA	NA	NA	NA	NA	NA	NA	NA	NA	NA	hypothetical protein	Hypo-rule applied	Bacteria;Proteobacteria;Betaproteobacteria;Burkholderiales;Comamonadaceae;Acidovorax;Acidovorax sp. Root219;Acidovorax sp. Root219	NA	NA	Ga0394449_00731	k141_740	Noviherbaspirillum sp. BP10	2831285802	MEGAHIT-QMFCE002AF.10.fa
Ga0394449_00731_157432_157725	18.5595	-9.64696	3.19866	-3.01594	0.00256183	0.00480272	DE	NA	NA	NA	NA	NA	NA	NA	NA	NA	NA	hypothetical protein	Hypo-rule applied	NA	NA	NA	Ga0394449_00731	k141_740	Noviherbaspirillum sp. BP10	2831285802	MEGAHIT-QMFCE002AF.10.fa
Ga0394449_00731_158029_159546	547.435	-6.76537	1.50885	-4.48378	7.33327e-06	1.98325e-05	DE	NA	NA	NA	NA	NA	NA	NA	NA	NA	NA	hypothetical protein	Hypo-rule applied	Bacteria;Proteobacteria;Betaproteobacteria;Burkholderiales;Burkholderiaceae;Cupriavidus;Cupriavidus sp. WS;Cupriavidus sp. WS	NA	NA	Ga0394449_00731	k141_740	Noviherbaspirillum sp. BP10	2831285802	MEGAHIT-QMFCE002AF.10.fa
Ga0394449_00731_159837_160994	409.356	-8.16273	3.05621	-2.67086	0.00756562	0.0131104	DE	NA	NA	NA	NA	NA	NA	NA	NA	NA	NA	hypothetical protein	COG5552	Bacteria;Proteobacteria;Betaproteobacteria;Burkholderiales;Burkholderiaceae;Burkholderia;Burkholderia thailandensis;Burkholderia thailandensis MSMB59	NA	NA	Ga0394449_00731	k141_740	Noviherbaspirillum sp. BP10	2831285802	MEGAHIT-QMFCE002AF.10.fa
Ga0394449_00731_160937_162988	500.635	-7.75115	1.62728	-4.76325	1.90499e-06	5.50734e-06	DE	NA	NA	NA	NA	NA	NA	NA	NA	NA	NA	DNA-binding MltR family transcriptional regulator	COG3722	Bacteria;Proteobacteria;Betaproteobacteria;Burkholderiales;Burkholderiaceae;Burkholderia;Burkholderia thailandensis;Burkholderia thailandensis MSMB59	NA	NA	Ga0394449_00731	k141_740	Noviherbaspirillum sp. BP10	2831285802	MEGAHIT-QMFCE002AF.10.fa
Ga0394449_00731_162973_165780	1195.41	-10.0012	1.78168	-5.61336	NA	NA	not_DE	NA	NA	NA	NA	NA	NA	NA	NA	NA	NA	superfamily II DNA or RNA helicase	COG1061	Bacteria;Proteobacteria;Betaproteobacteria;Burkholderiales;Burkholderiaceae;Burkholderia;Burkholderia thailandensis;Burkholderia thailandensis MSMB59	NA	NA	Ga0394449_00731	k141_740	Noviherbaspirillum sp. BP10	2831285802	MEGAHIT-QMFCE002AF.10.fa
Ga0394449_00731_165999_166157	161.781	-10.4129	2.26254	-4.60231	4.17834e-06	1.1607e-05	DE	NA	NA	NA	NA	NA	NA	NA	NA	NA	NA	hypothetical protein	Hypo-rule applied	Bacteria;Proteobacteria;Betaproteobacteria;Burkholderiales;Oxalobacteraceae;Herbaspirillum;Herbaspirillum sp. B501;Herbaspirillum sp. B501	NA	NA	Ga0394449_00731	k141_740	Noviherbaspirillum sp. BP10	2831285802	MEGAHIT-QMFCE002AF.10.fa
Ga0394449_00731_166251_167126	329.905	-6.38831	2.45686	-2.60019	0.0093172	0.0158405	DE	NA	NA	NA	NA	NA	NA	NA	NA	NA	NA	hypothetical protein	Hypo-rule applied	Bacteria;Proteobacteria;Alphaproteobacteria;Rhizobiales;Rhodobiaceae;Lutibaculum;Lutibaculum baratangense;Lutibaculum baratangense AMV1	NA	NA	Ga0394449_00731	k141_740	Noviherbaspirillum sp. BP10	2831285802	MEGAHIT-QMFCE002AF.10.fa
Ga0394449_00731_167285_168583	856.073	-6.18643	1.59577	-3.87676	0.000105855	0.000248325	DE	NA	NA	NA	NA	NA	NA	NA	NA	NA	NA	DNA (cytosine-5)-methyltransferase 1	KO:K00558	Bacteria;Proteobacteria;Betaproteobacteria;Burkholderiales;Burkholderiaceae;Caballeronia;Caballeronia sordidicola;Caballeronia sordidicola ES_PA-C8	EC:2.1.1.37	KO:K00558	Ga0394449_00731	k141_740	Noviherbaspirillum sp. BP10	2831285802	MEGAHIT-QMFCE002AF.10.fa
Ga0394449_00731_16760_18832	366.827	-8.19443	1.68709	-4.85712	1.19102e-06	3.52632e-06	DE	NA	NA	NA	NA	NA	NA	NA	NA	NA	NA	anaerobic selenocysteine-containing dehydrogenase	COG0243	Bacteria;Proteobacteria;Betaproteobacteria;Burkholderiales;Oxalobacteraceae;Noviherbaspirillum;Noviherbaspirillum denitrificans;Noviherbaspirillum denitrificans TSA40	NA	NA	Ga0394449_00731	k141_740	Noviherbaspirillum sp. BP10	2831285802	MEGAHIT-QMFCE002AF.10.fa
Ga0394449_00731_168661_169029	115.97	-8.02968	2.92451	-2.74565	0.00603916	0.0107176	DE	NA	NA	NA	NA	NA	NA	NA	NA	NA	NA	DNA mismatch endonuclease (patch repair protein)	KO:K07458	Bacteria;Proteobacteria;Gammaproteobacteria;Pseudomonadales;Pseudomonadaceae;Pseudomonas;Pseudomonas agarici;Pseudomonas agarici NCPPB 2289	EC:3.1.-	KO:K07458	Ga0394449_00731	k141_740	Noviherbaspirillum sp. BP10	2831285802	MEGAHIT-QMFCE002AF.10.fa
Ga0394449_00731_169462_170268	389.052	-9.40257	2.94468	-3.19307	0.00140768	0.00273185	DE	NA	NA	NA	NA	NA	NA	NA	NA	NA	NA	putative transposase	KO:K07497	Bacteria;Proteobacteria;Betaproteobacteria;Burkholderiales;Burkholderiaceae;Paucimonas;Paucimonas lemoignei;Paucimonas lemoignei DSM 7445	NA	KO:K07497	Ga0394449_00731	k141_740	Noviherbaspirillum sp. BP10	2831285802	MEGAHIT-QMFCE002AF.10.fa
Ga0394449_00731_170304_170567	10.1473	-8.7557	3.24563	-2.69769	0.00698221	0.0122056	DE	NA	NA	NA	NA	NA	NA	NA	NA	NA	NA	putative transposase	KO:K07497	Bacteria;Proteobacteria;Betaproteobacteria;Burkholderiales;Burkholderiaceae;Paucimonas;Paucimonas lemoignei;Paucimonas lemoignei DSM 7445	NA	KO:K07497	Ga0394449_00731	k141_740	Noviherbaspirillum sp. BP10	2831285802	MEGAHIT-QMFCE002AF.10.fa
Ga0394449_00731_170628_171284	292.137	-10.5643	2.76455	-3.82134	0.000132728	0.000306328	DE	NA	NA	NA	NA	NA	NA	NA	NA	NA	NA	hypothetical protein	Hypo-rule applied	Bacteria;Proteobacteria;Betaproteobacteria;Burkholderiales;Oxalobacteraceae;Collimonas;Collimonas sp. OK412;Collimonas sp. OK412	NA	NA	Ga0394449_00731	k141_740	Noviherbaspirillum sp. BP10	2831285802	MEGAHIT-QMFCE002AF.10.fa
Ga0394449_00731_171721_171957	3.08289	-6.93079	3.93955	-1.75928	0.0785296	0.0968611	not_DE	NA	NA	NA	NA	NA	NA	NA	NA	NA	NA	hypothetical protein	Hypo-rule applied	NA	NA	NA	Ga0394449_00731	k141_740	Noviherbaspirillum sp. BP10	2831285802	MEGAHIT-QMFCE002AF.10.fa
Ga0394449_00731_171959_172447	66.2121	-11.6074	2.41541	-4.80557	1.54308e-06	4.50613e-06	DE	NA	NA	NA	NA	NA	NA	NA	NA	NA	NA	hypothetical protein	Hypo-rule applied	Bacteria;Proteobacteria;Betaproteobacteria;Rhodocyclales;Zoogloeaceae;Thauera;Thauera sp. K11;Thauera sp. K11	NA	NA	Ga0394449_00731	k141_740	Noviherbaspirillum sp. BP10	2831285802	MEGAHIT-QMFCE002AF.10.fa
Ga0394449_00731_172525_172851	91.5016	-12.1678	2.10724	-5.77429	7.72788e-09	2.95615e-08	DE	NA	NA	NA	NA	NA	NA	NA	NA	NA	NA	hypothetical protein	Hypo-rule applied	Bacteria;Proteobacteria;Betaproteobacteria;Rhodocyclales;Zoogloeaceae;Thauera;Thauera sp. SWB20;Thauera sp. SWB20	NA	NA	Ga0394449_00731	k141_740	Noviherbaspirillum sp. BP10	2831285802	MEGAHIT-QMFCE002AF.10.fa
Ga0394449_00731_172859_173074	33.8426	-10.4662	3.86139	-2.71048	0.00671861	0.0117876	DE	NA	NA	NA	NA	NA	NA	NA	NA	NA	NA	hypothetical protein	Hypo-rule applied	Bacteria;Proteobacteria;Betaproteobacteria;Burkholderiales;Oxalobacteraceae;Noviherbaspirillum;Noviherbaspirillum autotrophicum;Noviherbaspirillum autotrophicum TSA66	NA	NA	Ga0394449_00731	k141_740	Noviherbaspirillum sp. BP10	2831285802	MEGAHIT-QMFCE002AF.10.fa
Ga0394449_00731_173353_173538	0.355341	-0.139794	3.96364	-0.035269	NA	NA	not_DE	NA	NA	NA	NA	NA	NA	NA	NA	NA	NA	hypothetical protein	Hypo-rule applied	NA	NA	NA	Ga0394449_00731	k141_740	Noviherbaspirillum sp. BP10	2831285802	MEGAHIT-QMFCE002AF.10.fa
Ga0394449_00731_173525_173941	78.8105	-8.61572	3.72677	-2.31185	NA	NA	not_DE	NA	NA	NA	NA	NA	NA	NA	NA	NA	NA	hypothetical protein	Hypo-rule applied	NA	NA	NA	Ga0394449_00731	k141_740	Noviherbaspirillum sp. BP10	2831285802	MEGAHIT-QMFCE002AF.10.fa
Ga0394449_00731_174213_175307	42.998	-11.1439	1.9273	-5.78213	7.37609e-09	2.8281e-08	DE	NA	NA	NA	NA	NA	NA	NA	NA	NA	NA	integrase	COG0582	Bacteria;Proteobacteria;Betaproteobacteria;Burkholderiales;Oxalobacteraceae;Noviherbaspirillum;Noviherbaspirillum autotrophicum;Noviherbaspirillum autotrophicum TSA66	NA	NA	Ga0394449_00731	k141_740	Noviherbaspirillum sp. BP10	2831285802	MEGAHIT-QMFCE002AF.10.fa
Ga0394449_00731_175355_175591	13.9352	-9.18539	3.87223	-2.37212	0.0176864	0.0277913	DE	NA	NA	NA	NA	NA	NA	NA	NA	NA	NA	hypothetical protein	Hypo-rule applied	NA	NA	NA	Ga0394449_00731	k141_740	Noviherbaspirillum sp. BP10	2831285802	MEGAHIT-QMFCE002AF.10.fa
Ga0394449_00731_176254_176598	33.2343	-10.4936	3.14584	-3.33569	0.000850873	0.00170907	DE	NA	NA	NA	NA	NA	NA	NA	NA	NA	NA	hypothetical protein	Hypo-rule applied	NA	NA	NA	Ga0394449_00731	k141_740	Noviherbaspirillum sp. BP10	2831285802	MEGAHIT-QMFCE002AF.10.fa
Ga0394449_00731_176558_177451	122.97	-12.3886	3.11734	-3.97409	7.06474e-05	0.000170252	DE	NA	NA	NA	NA	NA	NA	NA	NA	NA	NA	hypothetical protein	Hypo-rule applied	NA	NA	NA	Ga0394449_00731	k141_740	Noviherbaspirillum sp. BP10	2831285802	MEGAHIT-QMFCE002AF.10.fa
Ga0394449_00731_177733_178008	9.94768	-8.72592	3.87909	-2.24948	0.0244821	0.0365726	DE	NA	NA	NA	NA	NA	NA	NA	NA	NA	NA	hypothetical protein	Hypo-rule applied	NA	NA	NA	Ga0394449_00731	k141_740	Noviherbaspirillum sp. BP10	2831285802	MEGAHIT-QMFCE002AF.10.fa
Ga0394449_00731_178041_178262	45.7871	-27.1714	3.91234	-6.94506	3.78301e-12	2.1704e-11	DE	NA	NA	NA	NA	NA	NA	NA	NA	NA	NA	prophage regulatory protein	KO:K07733	Bacteria;Proteobacteria;Betaproteobacteria;Burkholderiales;Oxalobacteraceae;Massilia;Massilia putida;Massilia putida 6NM-7T	NA	KO:K07733	Ga0394449_00731	k141_740	Noviherbaspirillum sp. BP10	2831285802	MEGAHIT-QMFCE002AF.10.fa
Ga0394449_00731_178491_179660	464.405	-9.94971	2.12042	-4.69233	2.70111e-06	7.66599e-06	DE	NA	NA	NA	NA	NA	NA	NA	NA	NA	NA	hypothetical protein	Hypo-rule applied	Bacteria;Proteobacteria;Betaproteobacteria;Burkholderiales;Oxalobacteraceae;Janthinobacterium;Janthinobacterium sp. HH01;Janthinobacterium sp. HH01	NA	NA	Ga0394449_00731	k141_740	Noviherbaspirillum sp. BP10	2831285802	MEGAHIT-QMFCE002AF.10.fa
Ga0394449_00731_180209_180439	9.39296	-8.81234	2.35634	-3.73984	0.000184141	0.000415905	DE	NA	NA	NA	NA	NA	NA	NA	NA	NA	NA	hypothetical protein	Hypo-rule applied	NA	NA	NA	Ga0394449_00731	k141_740	Noviherbaspirillum sp. BP10	2831285802	MEGAHIT-QMFCE002AF.10.fa
Ga0394449_00731_180377_180817	40.7852	-10.808	3.006	-3.59547	0.00032381	0.00070023	DE	NA	NA	NA	NA	NA	NA	NA	NA	NA	NA	transposase	COG3415	Bacteria;Actinobacteria;Actinobacteria;Corynebacteriales;Nocardiaceae;Nocardia;Nocardia jiangxiensis;Nocardia jiangxiensis NBRC 101359	NA	NA	Ga0394449_00731	k141_740	Noviherbaspirillum sp. BP10	2831285802	MEGAHIT-QMFCE002AF.10.fa
Ga0394449_00731_180783_181349	225.45	-10.715	1.83932	-5.82551	5.69392e-09	2.20464e-08	DE	NA	NA	NA	NA	NA	NA	NA	NA	NA	NA	transposase	COG3335	Bacteria;Planctomycetes;Planctomycetia;Planctomycetales;Gemmataceae;Gemmata;Gemmata sp. SH-PL17;Gemmata sp. SH-PL17	NA	NA	Ga0394449_00731	k141_740	Noviherbaspirillum sp. BP10	2831285802	MEGAHIT-QMFCE002AF.10.fa
Ga0394449_00731_181460_181927	7.02982	-8.27667	3.27857	-2.52448	0.011587	0.0192096	DE	NA	NA	NA	NA	NA	NA	NA	NA	NA	NA	transposase	COG3547	Bacteria;Proteobacteria;Betaproteobacteria;Burkholderiales;Oxalobacteraceae;Massilia;Massilia sp. GV090;Massilia sp. GV090	NA	NA	Ga0394449_00731	k141_740	Noviherbaspirillum sp. BP10	2831285802	MEGAHIT-QMFCE002AF.10.fa
Ga0394449_00731_182141_182437	0.446454	0.111333	3.96284	0.0280941	NA	NA	not_DE	NA	NA	NA	NA	NA	NA	NA	NA	NA	NA	proteic killer suppression protein	KO:K07334	Bacteria;Proteobacteria;Betaproteobacteria;Burkholderiales;Oxalobacteraceae;Janthinobacterium;Janthinobacterium sp. CG3;Janthinobacterium sp. CG3	NA	KO:K07334	Ga0394449_00731	k141_740	Noviherbaspirillum sp. BP10	2831285802	MEGAHIT-QMFCE002AF.10.fa
Ga0394449_00731_182440_183585	2184.01	-9.28731	2.36224	-3.93158	8.43911e-05	0.000201133	DE	NA	NA	NA	NA	NA	NA	NA	NA	NA	NA	HTH-type transcriptional regulator/antitoxin HigA	KO:K18831	Bacteria;Proteobacteria;Betaproteobacteria;Burkholderiales;Oxalobacteraceae;Janthinobacterium;Janthinobacterium sp. CG3;Janthinobacterium sp. CG3	NA	KO:K18831	Ga0394449_00731	k141_740	Noviherbaspirillum sp. BP10	2831285802	MEGAHIT-QMFCE002AF.10.fa
Ga0394449_00731_183609_184079	225.146	-8.52899	2.15867	-3.95103	7.78148e-05	0.000186321	DE	NA	NA	NA	NA	NA	NA	NA	NA	NA	NA	hypothetical protein	Hypo-rule applied	Bacteria;Proteobacteria;Betaproteobacteria;Burkholderiales;Oxalobacteraceae;Janthinobacterium;Janthinobacterium sp. CG3;Janthinobacterium sp. CG3	NA	NA	Ga0394449_00731	k141_740	Noviherbaspirillum sp. BP10	2831285802	MEGAHIT-QMFCE002AF.10.fa
Ga0394449_00731_184108_185025	966.455	-8.14287	1.41016	-5.77444	7.7211e-09	2.95431e-08	DE	NA	NA	NA	NA	NA	NA	NA	NA	NA	NA	hypothetical protein	Hypo-rule applied	Bacteria;Proteobacteria;Betaproteobacteria;Burkholderiales;Oxalobacteraceae;Janthinobacterium;Janthinobacterium sp. CG3;Janthinobacterium sp. CG3	NA	NA	Ga0394449_00731	k141_740	Noviherbaspirillum sp. BP10	2831285802	MEGAHIT-QMFCE002AF.10.fa
Ga0394449_00731_185141_185545	32.1309	-6.99732	2.92388	-2.39316	0.0167039	0.0264619	DE	NA	NA	NA	NA	NA	NA	NA	NA	NA	NA	hypothetical protein	Hypo-rule applied	Bacteria;Proteobacteria;Betaproteobacteria;Burkholderiales;Burkholderiaceae;Burkholderia;Burkholderia sp. PAMC 26561;Burkholderia sp. PAMC 26561	NA	NA	Ga0394449_00731	k141_740	Noviherbaspirillum sp. BP10	2831285802	MEGAHIT-QMFCE002AF.10.fa
Ga0394449_00731_18840_19931	65.4431	-11.5949	2.40535	-4.82048	1.43211e-06	4.19521e-06	DE	NA	NA	NA	NA	NA	NA	NA	NA	NA	NA	predicted aminopeptidase	COG4324	Bacteria;Proteobacteria;Betaproteobacteria;Burkholderiales;Oxalobacteraceae;Noviherbaspirillum;Noviherbaspirillum denitrificans;Noviherbaspirillum denitrificans TSA40	NA	NA	Ga0394449_00731	k141_740	Noviherbaspirillum sp. BP10	2831285802	MEGAHIT-QMFCE002AF.10.fa
Ga0394449_00731_20203_21888	3844.55	-11.4091	2.1583	-5.28613	1.24933e-07	4.15348e-07	DE	NA	23.8139	NA	NA	NA	NA	23.8139	NA	2	0	long-chain acyl-CoA synthetase	KO:K01897	Bacteria;Proteobacteria;Betaproteobacteria;Burkholderiales;Oxalobacteraceae;Noviherbaspirillum;Noviherbaspirillum denitrificans;Noviherbaspirillum denitrificans TSA40	EC:6.2.1.3	KO:K01897	Ga0394449_00731	k141_740	Noviherbaspirillum sp. BP10	2831285802	MEGAHIT-QMFCE002AF.10.fa
Ga0394449_00731_217_480	58.8575	-8.58314	3.67446	-2.33589	0.0194967	0.03016	DE	NA	NA	NA	NA	NA	NA	NA	NA	NA	NA	putative transposase	KO:K07497	Bacteria;Proteobacteria;Betaproteobacteria;Burkholderiales;Burkholderiaceae;Paucimonas;Paucimonas lemoignei;Paucimonas lemoignei DSM 7445	NA	KO:K07497	Ga0394449_00731	k141_740	Noviherbaspirillum sp. BP10	2831285802	MEGAHIT-QMFCE002AF.10.fa
Ga0394449_00731_21992_23578	174.728	-10.9855	2.23095	-4.92411	8.47444e-07	2.55465e-06	DE	NA	NA	NA	NA	NA	NA	NA	NA	NA	NA	alkaline phosphatase D	KO:K01113	Bacteria;Proteobacteria;Betaproteobacteria;Burkholderiales;Oxalobacteraceae;Noviherbaspirillum;Noviherbaspirillum denitrificans;Noviherbaspirillum denitrificans TSA40	EC:3.1.3.1	KO:K01113	Ga0394449_00731	k141_740	Noviherbaspirillum sp. BP10	2831285802	MEGAHIT-QMFCE002AF.10.fa
Ga0394449_00731_23685_24092	1.85786	-3.23402	3.9084	-0.827454	0.40798	0.440261	not_DE	NA	24.9316	NA	NA	NA	NA	24.9316	NA	2	0	acyl-CoA thioesterase YciA	KO:K10806	Bacteria;Proteobacteria;Betaproteobacteria;Burkholderiales;Oxalobacteraceae;Herbaspirillum;Herbaspirillum autotrophicum;Herbaspirillum autotrophicum IAM 14942	EC:3.1.2.-	KO:K10806	Ga0394449_00731	k141_740	Noviherbaspirillum sp. BP10	2831285802	MEGAHIT-QMFCE002AF.10.fa
Ga0394449_00731_24188_26047	293.657	-10.2847	2.22459	-4.62319	3.77882e-06	1.05541e-05	DE	NA	NA	NA	NA	NA	NA	NA	NA	NA	NA	ATP-binding cassette subfamily B protein	KO:K06147	Bacteria;Proteobacteria;Betaproteobacteria;Burkholderiales;Oxalobacteraceae;Noviherbaspirillum;Noviherbaspirillum sp. Root189;Noviherbaspirillum sp. Root189	NA	KO:K06147	Ga0394449_00731	k141_740	Noviherbaspirillum sp. BP10	2831285802	MEGAHIT-QMFCE002AF.10.fa
Ga0394449_00731_26102_27079	94.1041	-12.0086	3.06814	-3.91397	9.07902e-05	0.000215421	DE	NA	NA	NA	NA	NA	NA	NA	NA	NA	NA	DNA-binding transcriptional LysR family regulator	COG0583	Bacteria;Proteobacteria;Betaproteobacteria;Burkholderiales;Oxalobacteraceae;Noviherbaspirillum;Noviherbaspirillum denitrificans;Noviherbaspirillum denitrificans TSA40	NA	NA	Ga0394449_00731	k141_740	Noviherbaspirillum sp. BP10	2831285802	MEGAHIT-QMFCE002AF.10.fa
Ga0394449_00731_2737_4005	83.8442	-9.90221	2.86379	-3.45773	0.000544743	0.00113335	DE	NA	NA	NA	NA	NA	NA	NA	NA	NA	NA	4-aminobutyrate aminotransferase	TIGR00700	Bacteria;Proteobacteria;Betaproteobacteria;Burkholderiales;Oxalobacteraceae;Noviherbaspirillum;Noviherbaspirillum autotrophicum;Noviherbaspirillum autotrophicum TSA66	NA	NA	Ga0394449_00731	k141_740	Noviherbaspirillum sp. BP10	2831285802	MEGAHIT-QMFCE002AF.10.fa
Ga0394449_00731_28676_29578	521.371	-6.09736	1.8219	-3.34669	0.000817812	0.00164843	DE	NA	NA	NA	NA	NA	NA	NA	NA	NA	NA	glutamate/aspartate transport system substrate-binding protein	KO:K10001	Bacteria;Proteobacteria;Betaproteobacteria;Burkholderiales;Oxalobacteraceae;Noviherbaspirillum;Noviherbaspirillum sp. Root189;Noviherbaspirillum sp. Root189	NA	KO:K10001	Ga0394449_00731	k141_740	Noviherbaspirillum sp. BP10	2831285802	MEGAHIT-QMFCE002AF.10.fa
Ga0394449_00731_30770_31495	288.038	-9.77615	2.16555	-4.5144	6.34966e-06	1.72963e-05	DE	NA	24.971	NA	NA	NA	NA	24.971	NA	3	0	glutamate/aspartate transport system permease protein	KO:K10003	Bacteria;Proteobacteria;Betaproteobacteria;Burkholderiales;Oxalobacteraceae;Noviherbaspirillum;Noviherbaspirillum denitrificans;Noviherbaspirillum denitrificans TSA40	NA	KO:K10003	Ga0394449_00731	k141_740	Noviherbaspirillum sp. BP10	2831285802	MEGAHIT-QMFCE002AF.10.fa
Ga0394449_00731_31495_32181	49.1422	-6.32869	1.4348	-4.41086	1.02961e-05	2.73548e-05	DE	NA	NA	NA	NA	NA	NA	NA	NA	NA	NA	glutamate/aspartate transport system permease protein	KO:K10002	Bacteria;Proteobacteria;Betaproteobacteria;Burkholderiales;Oxalobacteraceae;Noviherbaspirillum;Noviherbaspirillum denitrificans;Noviherbaspirillum denitrificans TSA40	NA	KO:K10002	Ga0394449_00731	k141_740	Noviherbaspirillum sp. BP10	2831285802	MEGAHIT-QMFCE002AF.10.fa
Ga0394449_00731_32192_32917	159.407	-6.3894	1.4656	-4.35959	1.30305e-05	3.43146e-05	DE	NA	NA	NA	NA	NA	NA	NA	NA	NA	NA	glutamate/aspartate transport system ATP-binding protein	KO:K10004	Bacteria;Proteobacteria;Betaproteobacteria;Burkholderiales;Oxalobacteraceae;Noviherbaspirillum;Noviherbaspirillum autotrophicum;Noviherbaspirillum autotrophicum TSA66	EC:3.6.3.-	KO:K10004	Ga0394449_00731	k141_740	Noviherbaspirillum sp. BP10	2831285802	MEGAHIT-QMFCE002AF.10.fa
Ga0394449_00731_33044_34102	160.517	-5.34488	1.99239	-2.68265	NA	NA	not_DE	NA	NA	NA	NA	NA	NA	NA	NA	NA	NA	dihydroorotase	KO:K01465	Bacteria;Proteobacteria;Betaproteobacteria;Burkholderiales;Oxalobacteraceae;Noviherbaspirillum;Noviherbaspirillum autotrophicum;Noviherbaspirillum autotrophicum TSA66	EC:3.5.2.3	KO:K01465	Ga0394449_00731	k141_740	Noviherbaspirillum sp. BP10	2831285802	MEGAHIT-QMFCE002AF.10.fa
Ga0394449_00731_34159_34971	308.867	-13.82	2.46169	-5.61401	1.97687e-08	7.18835e-08	DE	NA	NA	NA	NA	NA	NA	NA	NA	NA	NA	hypothetical protein	Hypo-rule applied	Bacteria;Proteobacteria;Betaproteobacteria;Burkholderiales;Oxalobacteraceae;Noviherbaspirillum;Noviherbaspirillum autotrophicum;Noviherbaspirillum autotrophicum TSA66	NA	NA	Ga0394449_00731	k141_740	Noviherbaspirillum sp. BP10	2831285802	MEGAHIT-QMFCE002AF.10.fa
Ga0394449_00731_36106_36240	10.1656	-6.70386	2.72171	-2.46311	0.0137739	0.0223902	DE	NA	NA	NA	NA	NA	NA	NA	NA	NA	NA	hypothetical protein	Hypo-rule applied	NA	NA	NA	Ga0394449_00731	k141_740	Noviherbaspirillum sp. BP10	2831285802	MEGAHIT-QMFCE002AF.10.fa
Ga0394449_00731_37710_37949	43.5034	-10.8517	3.43437	-3.15973	0.00157917	0.003043	DE	NA	NA	NA	NA	NA	NA	NA	NA	NA	NA	hypothetical protein	Hypo-rule applied	NA	NA	NA	Ga0394449_00731	k141_740	Noviherbaspirillum sp. BP10	2831285802	MEGAHIT-QMFCE002AF.10.fa
Ga0394449_00731_37952_38578	31.6978	-4.24366	2.35232	-1.80404	0.0712254	0.0908794	not_DE	NA	NA	NA	NA	NA	NA	NA	NA	NA	NA	ubiquinone biosynthesis monooxygenase Coq7	KO:K06134	Bacteria;Proteobacteria;Betaproteobacteria;Burkholderiales;Oxalobacteraceae;Noviherbaspirillum;Noviherbaspirillum denitrificans;Noviherbaspirillum denitrificans TSA40	EC:1.14.13.-	KO:K06134	Ga0394449_00731	k141_740	Noviherbaspirillum sp. BP10	2831285802	MEGAHIT-QMFCE002AF.10.fa
Ga0394449_00731_38627_39079	348.641	-10.2221	2.08801	-4.89564	9.79865e-07	2.929e-06	DE	NA	NA	NA	NA	NA	NA	NA	NA	NA	NA	putative redox protein	KO:K07397	Bacteria;Proteobacteria;Betaproteobacteria;Burkholderiales;Oxalobacteraceae;Collimonas;Collimonas sp. OK607;Collimonas sp. OK607	NA	KO:K07397	Ga0394449_00731	k141_740	Noviherbaspirillum sp. BP10	2831285802	MEGAHIT-QMFCE002AF.10.fa
Ga0394449_00731_39452_39518	84.7379	-11.8398	3.21281	-3.68518	0.000228541	0.000508194	DE	NA	NA	NA	NA	NA	NA	NA	NA	NA	NA	toxic small RNA	ncRNA	NA	NA	NA	Ga0394449_00731	k141_740	Noviherbaspirillum sp. BP10	2831285802	MEGAHIT-QMFCE002AF.10.fa
Ga0394449_00731_4067_5170	126.373	-12.4814	2.72182	-4.58569	NA	NA	not_DE	NA	NA	NA	NA	NA	NA	NA	NA	NA	NA	putative spermidine/putrescine transport system ATP-binding protein	KO:K02052	Bacteria;Proteobacteria;Betaproteobacteria;Burkholderiales;Oxalobacteraceae;Noviherbaspirillum;Noviherbaspirillum autotrophicum;Noviherbaspirillum autotrophicum TSA66	NA	KO:K02052	Ga0394449_00731	k141_740	Noviherbaspirillum sp. BP10	2831285802	MEGAHIT-QMFCE002AF.10.fa
Ga0394449_00731_41789_41947	49.0635	-11.0518	3.20651	-3.44667	0.000567543	0.00117718	DE	NA	NA	NA	NA	NA	NA	NA	NA	NA	NA	hypothetical protein	Hypo-rule applied	NA	NA	NA	Ga0394449_00731	k141_740	Noviherbaspirillum sp. BP10	2831285802	MEGAHIT-QMFCE002AF.10.fa
Ga0394449_00731_41952_42554	41.3507	-5.73712	2.35609	-2.43502	0.014891	0.0239276	DE	NA	NA	NA	NA	NA	NA	NA	NA	NA	NA	hypothetical protein	Hypo-rule applied	Bacteria;Proteobacteria;Betaproteobacteria;Burkholderiales;Oxalobacteraceae;Noviherbaspirillum;Noviherbaspirillum autotrophicum;Noviherbaspirillum autotrophicum TSA66	NA	NA	Ga0394449_00731	k141_740	Noviherbaspirillum sp. BP10	2831285802	MEGAHIT-QMFCE002AF.10.fa
Ga0394449_00731_42567_42956	154.35	-6.85965	1.47111	-4.66292	3.11761e-06	8.79623e-06	DE	NA	NA	NA	NA	NA	NA	NA	NA	NA	NA	cytoskeletal protein CcmA (bactofilin family)	COG1664	Bacteria;Proteobacteria;Betaproteobacteria;Burkholderiales;Oxalobacteraceae;Noviherbaspirillum;Noviherbaspirillum sp. Root189;Noviherbaspirillum sp. Root189	NA	NA	Ga0394449_00731	k141_740	Noviherbaspirillum sp. BP10	2831285802	MEGAHIT-QMFCE002AF.10.fa
Ga0394449_00731_43007_43354	543.299	-6.82052	1.52929	-4.45991	8.19937e-06	2.2055e-05	DE	NA	24.8618	NA	NA	NA	NA	NA	24.8618	0	3	iron-sulfur cluster insertion protein	KO:K15724	Bacteria;Proteobacteria;Betaproteobacteria;Burkholderiales;Burkholderiaceae;Paucimonas;Paucimonas lemoignei;Paucimonas lemoignei DSM 7445	NA	KO:K15724	Ga0394449_00731	k141_740	Noviherbaspirillum sp. BP10	2831285802	MEGAHIT-QMFCE002AF.10.fa
Ga0394449_00731_43423_44556	130.182	-10.7337	1.89628	-5.66038	1.51035e-08	5.58583e-08	DE	NA	NA	NA	NA	NA	NA	NA	NA	NA	NA	anhydro-N-acetylmuramic acid kinase	KO:K09001	Bacteria;Proteobacteria;Betaproteobacteria;Burkholderiales;Oxalobacteraceae;Noviherbaspirillum;Noviherbaspirillum autotrophicum;Noviherbaspirillum autotrophicum TSA66	EC:2.7.1.170	KO:K09001	Ga0394449_00731	k141_740	Noviherbaspirillum sp. BP10	2831285802	MEGAHIT-QMFCE002AF.10.fa
Ga0394449_00731_44617_45984	555.337	-7.78729	2.28427	-3.40909	NA	NA	not_DE	NA	NA	NA	NA	NA	NA	NA	NA	NA	NA	murein DD-endopeptidase MepM/ murein hydrolase activator NlpD	COG0739	Bacteria;Proteobacteria;Betaproteobacteria;Burkholderiales;Oxalobacteraceae;Noviherbaspirillum;Noviherbaspirillum denitrificans;Noviherbaspirillum denitrificans TSA40	NA	NA	Ga0394449_00731	k141_740	Noviherbaspirillum sp. BP10	2831285802	MEGAHIT-QMFCE002AF.10.fa
Ga0394449_00731_474_788	100.609	-9.68012	2.61491	-3.70189	0.000213996	0.000477772	DE	NA	NA	NA	NA	NA	NA	NA	NA	NA	NA	transposase InsO family protein	COG2801	Bacteria;Proteobacteria;Betaproteobacteria;Rhodocyclales;Rhodocyclaceae;unclassified Rhodocyclaceae;Rhodocyclaceae bacterium Paddy-1;Rhodocyclaceae bacterium Paddy-1	NA	NA	Ga0394449_00731	k141_740	Noviherbaspirillum sp. BP10	2831285802	MEGAHIT-QMFCE002AF.10.fa
Ga0394449_00731_47517_47972	95.4123	-12.0367	3.02171	-3.98341	6.79337e-05	0.000164136	DE	NA	NA	NA	NA	NA	NA	NA	NA	NA	NA	D-tyrosyl-tRNA(Tyr) deacylase	KO:K07560	Bacteria;Proteobacteria;Betaproteobacteria;Burkholderiales;Oxalobacteraceae;Noviherbaspirillum;Noviherbaspirillum sp. Root189;Noviherbaspirillum sp. Root189	EC:3.1.-	KO:K07560	Ga0394449_00731	k141_740	Noviherbaspirillum sp. BP10	2831285802	MEGAHIT-QMFCE002AF.10.fa
Ga0394449_00731_48057_48698	82.7967	-6.14844	1.35662	-4.53216	5.83827e-06	1.59686e-05	DE	NA	NA	NA	NA	NA	NA	NA	NA	NA	NA	hypothetical protein	KO:K06910	Bacteria;Proteobacteria;Betaproteobacteria;Burkholderiales;Oxalobacteraceae;Noviherbaspirillum;Noviherbaspirillum sp. Root189;Noviherbaspirillum sp. Root189	NA	KO:K06910	Ga0394449_00731	k141_740	Noviherbaspirillum sp. BP10	2831285802	MEGAHIT-QMFCE002AF.10.fa
Ga0394449_00731_48725_49375	160.068	-8.25857	2.82917	-2.91907	0.00351074	0.00646797	DE	NA	NA	NA	NA	NA	NA	NA	NA	NA	NA	probable phosphoglycerate mutase	KO:K15634	Bacteria;Proteobacteria;Betaproteobacteria;Burkholderiales;Oxalobacteraceae;Noviherbaspirillum;Noviherbaspirillum autotrophicum;Noviherbaspirillum autotrophicum TSA66	EC:5.4.2.12	KO:K15634	Ga0394449_00731	k141_740	Noviherbaspirillum sp. BP10	2831285802	MEGAHIT-QMFCE002AF.10.fa
Ga0394449_00731_49547_50515	346.162	-8.55858	2.18847	-3.91076	NA	NA	not_DE	NA	NA	NA	NA	NA	NA	NA	NA	NA	NA	tRNA-dihydrouridine synthase B	KO:K05540	Bacteria;Proteobacteria;Betaproteobacteria;Burkholderiales;Oxalobacteraceae;Noviherbaspirillum;Noviherbaspirillum denitrificans;Noviherbaspirillum denitrificans TSA40	EC:1.-	KO:K05540	Ga0394449_00731	k141_740	Noviherbaspirillum sp. BP10	2831285802	MEGAHIT-QMFCE002AF.10.fa
Ga0394449_00731_50545_50778	33.3156	-3.09088	2.97549	-1.03878	0.298907	0.328292	not_DE	NA	NA	NA	NA	NA	NA	NA	NA	NA	NA	Fis family transcriptional regulator	KO:K03557	Bacteria;Proteobacteria;Betaproteobacteria;Burkholderiales;Oxalobacteraceae;Noviherbaspirillum;Noviherbaspirillum sp. Root189;Noviherbaspirillum sp. Root189	NA	KO:K03557	Ga0394449_00731	k141_740	Noviherbaspirillum sp. BP10	2831285802	MEGAHIT-QMFCE002AF.10.fa
Ga0394449_00731_52479_53021	22.5756	-9.90338	3.38312	-2.92729	0.00341925	0.00630953	DE	NA	NA	NA	NA	NA	NA	NA	NA	NA	NA	crossover junction endodeoxyribonuclease RuvC	KO:K01159	Bacteria;Proteobacteria;Betaproteobacteria;Burkholderiales;Oxalobacteraceae;Noviherbaspirillum;Noviherbaspirillum sp. Root189;Noviherbaspirillum sp. Root189	EC:3.1.22.4	KO:K01159	Ga0394449_00731	k141_740	Noviherbaspirillum sp. BP10	2831285802	MEGAHIT-QMFCE002AF.10.fa
Ga0394449_00731_5285_6316	377.459	-14.1558	2.27328	-6.22702	4.75379e-10	2.06023e-09	DE	NA	NA	NA	NA	NA	NA	NA	NA	NA	NA	putative spermidine/putrescine transport system substrate-binding protein	KO:K02055	Bacteria;Proteobacteria;Betaproteobacteria;Burkholderiales;Oxalobacteraceae;Noviherbaspirillum;Noviherbaspirillum autotrophicum;Noviherbaspirillum autotrophicum TSA66	NA	KO:K02055	Ga0394449_00731	k141_740	Noviherbaspirillum sp. BP10	2831285802	MEGAHIT-QMFCE002AF.10.fa
Ga0394449_00731_53018_53584	132.749	-12.5003	3.10617	-4.02434	5.71364e-05	0.000139401	DE	NA	NA	NA	NA	NA	NA	NA	NA	NA	NA	hypothetical protein	Hypo-rule applied	Bacteria;Proteobacteria;Betaproteobacteria;Burkholderiales;Oxalobacteraceae;Noviherbaspirillum;Noviherbaspirillum sp. Root189;Noviherbaspirillum sp. Root189	NA	NA	Ga0394449_00731	k141_740	Noviherbaspirillum sp. BP10	2831285802	MEGAHIT-QMFCE002AF.10.fa
Ga0394449_00731_53783_54361	97.5772	-10.7238	1.81909	-5.89513	3.74386e-09	1.47405e-08	DE	NA	NA	NA	NA	NA	NA	NA	NA	NA	NA	Holliday junction DNA helicase RuvA	KO:K03550	Bacteria;Proteobacteria;Betaproteobacteria;Burkholderiales;Oxalobacteraceae;Noviherbaspirillum;Noviherbaspirillum sp. Root189;Noviherbaspirillum sp. Root189	EC:3.6.4.12	KO:K03550	Ga0394449_00731	k141_740	Noviherbaspirillum sp. BP10	2831285802	MEGAHIT-QMFCE002AF.10.fa
Ga0394449_00731_54377_55432	87.4778	-12.0873	2.12785	-5.68055	1.34263e-08	5.00271e-08	DE	NA	NA	NA	NA	NA	NA	NA	NA	NA	NA	Holliday junction DNA helicase RuvB	KO:K03551	Bacteria;Proteobacteria;Betaproteobacteria;Burkholderiales;Oxalobacteraceae;Noviherbaspirillum;Noviherbaspirillum autotrophicum;Noviherbaspirillum autotrophicum TSA66	EC:3.6.4.12	KO:K03551	Ga0394449_00731	k141_740	Noviherbaspirillum sp. BP10	2831285802	MEGAHIT-QMFCE002AF.10.fa
Ga0394449_00731_55745_56575	581.624	-10.3021	1.96731	-5.23666	NA	NA	not_DE	NA	NA	NA	NA	NA	NA	NA	NA	NA	NA	2-keto-4-pentenoate hydratase	COG3971	Bacteria;Proteobacteria;Betaproteobacteria;Burkholderiales;Oxalobacteraceae;Noviherbaspirillum;Noviherbaspirillum sp. Root189;Noviherbaspirillum sp. Root189	NA	NA	Ga0394449_00731	k141_740	Noviherbaspirillum sp. BP10	2831285802	MEGAHIT-QMFCE002AF.10.fa
Ga0394449_00731_56617_56931	155.471	-11.9341	2.63709	-4.52548	6.02596e-06	1.64609e-05	DE	NA	NA	NA	NA	NA	NA	NA	NA	NA	NA	quaternary ammonium compound-resistance protein SugE	KO:K11741	Bacteria;Proteobacteria;Betaproteobacteria;Burkholderiales;Oxalobacteraceae;Noviherbaspirillum;Noviherbaspirillum humi;Noviherbaspirillum humi U15	NA	KO:K11741	Ga0394449_00731	k141_740	Noviherbaspirillum sp. BP10	2831285802	MEGAHIT-QMFCE002AF.10.fa
Ga0394449_00731_56996_57445	223.63	-9.84096	2.01374	-4.8869	1.02438e-06	3.05412e-06	DE	NA	NA	NA	NA	NA	NA	NA	NA	NA	NA	uncharacterized protein (DUF2147 family)	COG4731	Bacteria;Proteobacteria;Betaproteobacteria;Burkholderiales;Oxalobacteraceae;Noviherbaspirillum;Noviherbaspirillum denitrificans;Noviherbaspirillum denitrificans TSA40	NA	NA	Ga0394449_00731	k141_740	Noviherbaspirillum sp. BP10	2831285802	MEGAHIT-QMFCE002AF.10.fa
Ga0394449_00731_57565_60375	801.207	-8.67651	2.25559	-3.84668	NA	NA	not_DE	NA	NA	NA	NA	NA	NA	NA	NA	NA	NA	valyl-tRNA synthetase	KO:K01873	Bacteria;Proteobacteria;Betaproteobacteria;Burkholderiales;Oxalobacteraceae;Noviherbaspirillum;Noviherbaspirillum autotrophicum;Noviherbaspirillum autotrophicum TSA66	EC:6.1.1.9	KO:K01873	Ga0394449_00731	k141_740	Noviherbaspirillum sp. BP10	2831285802	MEGAHIT-QMFCE002AF.10.fa
Ga0394449_00731_60645_62558	403.752	-7.68625	2.25573	-3.40743	0.000655774	0.00134764	DE	NA	24.8854	NA	NA	NA	NA	NA	24.8854	0	3	phosphomethylpyrimidine synthase	KO:K03147	Bacteria;Proteobacteria;Betaproteobacteria;Burkholderiales;Oxalobacteraceae;Noviherbaspirillum;Noviherbaspirillum denitrificans;Noviherbaspirillum denitrificans TSA40	EC:4.1.99.17	KO:K03147	Ga0394449_00731	k141_740	Noviherbaspirillum sp. BP10	2831285802	MEGAHIT-QMFCE002AF.10.fa
Ga0394449_00731_62555_62773	3.5092	-4.70641	3.80727	-1.23616	0.216398	0.241296	not_DE	NA	NA	NA	NA	NA	NA	NA	NA	NA	NA	sulfur carrier protein	KO:K03154	Bacteria;Proteobacteria;Betaproteobacteria;Burkholderiales;Oxalobacteraceae;Noviherbaspirillum;Noviherbaspirillum autotrophicum;Noviherbaspirillum autotrophicum TSA66	NA	KO:K03154	Ga0394449_00731	k141_740	Noviherbaspirillum sp. BP10	2831285802	MEGAHIT-QMFCE002AF.10.fa
Ga0394449_00731_62826_63629	177.105	-9.63803	1.84727	-5.21746	1.81396e-07	5.9096e-07	DE	NA	NA	NA	NA	NA	NA	NA	NA	NA	NA	thiazole synthase	KO:K03149	Bacteria;Proteobacteria;Betaproteobacteria;Burkholderiales;Oxalobacteraceae;Noviherbaspirillum;Noviherbaspirillum autotrophicum;Noviherbaspirillum autotrophicum TSA66	EC:2.8.1.10	KO:K03149	Ga0394449_00731	k141_740	Noviherbaspirillum sp. BP10	2831285802	MEGAHIT-QMFCE002AF.10.fa
Ga0394449_00731_63626_64417	109.851	-8.82403	2.2449	-3.93071	8.46965e-05	0.000201796	DE	NA	NA	NA	NA	NA	NA	NA	NA	NA	NA	hydroxymethylpyrimidine/phosphomethylpyrimidine kinase	KO:K00941	Bacteria;Proteobacteria;Betaproteobacteria;Burkholderiales;Oxalobacteraceae;Noviherbaspirillum;Noviherbaspirillum autotrophicum;Noviherbaspirillum autotrophicum TSA66	EC:2.7.1.49,EC:2.7.4.7	KO:K00941	Ga0394449_00731	k141_740	Noviherbaspirillum sp. BP10	2831285802	MEGAHIT-QMFCE002AF.10.fa
Ga0394449_00731_64414_65025	5.97223	-7.96101	3.8965	-2.04312	0.0410406	0.0560085	not_DE	NA	NA	NA	NA	NA	NA	NA	NA	NA	NA	thiamine-phosphate pyrophosphorylase	KO:K00788	Bacteria;Proteobacteria;Betaproteobacteria;Burkholderiales;Oxalobacteraceae;Noviherbaspirillum;Noviherbaspirillum autotrophicum;Noviherbaspirillum autotrophicum TSA66	EC:2.5.1.3	KO:K00788	Ga0394449_00731	k141_740	Noviherbaspirillum sp. BP10	2831285802	MEGAHIT-QMFCE002AF.10.fa
Ga0394449_00731_6442_7725	80.7195	-9.44825	2.90905	-3.24788	NA	NA	not_DE	NA	NA	NA	NA	NA	NA	NA	NA	NA	NA	putative spermidine/putrescine transport system permease protein	KO:K02054	Bacteria;Proteobacteria;Betaproteobacteria;Burkholderiales;Oxalobacteraceae;Noviherbaspirillum;Noviherbaspirillum autotrophicum;Noviherbaspirillum autotrophicum TSA66	NA	KO:K02054	Ga0394449_00731	k141_740	Noviherbaspirillum sp. BP10	2831285802	MEGAHIT-QMFCE002AF.10.fa
Ga0394449_00731_65068_66240	149.031	-9.06974	2.2186	-4.08806	4.35002e-05	0.000107823	DE	NA	NA	NA	NA	NA	NA	NA	NA	NA	NA	selenocysteine lyase/cysteine desulfurase	COG0520	Bacteria;Proteobacteria;Betaproteobacteria;Burkholderiales;Oxalobacteraceae;Massilia;Massilia psychrophila;Massilia psychrophila JCM 30813	NA	NA	Ga0394449_00731	k141_740	Noviherbaspirillum sp. BP10	2831285802	MEGAHIT-QMFCE002AF.10.fa
Ga0394449_00731_66328_67197	65.9226	-11.481	3.17059	-3.6211	0.000293348	0.000639354	DE	NA	NA	NA	NA	NA	NA	NA	NA	NA	NA	4-hydroxy-tetrahydrodipicolinate synthase	KO:K01714	Bacteria;Proteobacteria;Betaproteobacteria;Burkholderiales;Oxalobacteraceae;Herbaspirillum;Herbaspirillum autotrophicum;Herbaspirillum autotrophicum IAM 14942	EC:4.3.3.7	KO:K01714	Ga0394449_00731	k141_740	Noviherbaspirillum sp. BP10	2831285802	MEGAHIT-QMFCE002AF.10.fa
Ga0394449_00731_67334_67573	150.176	-12.6815	3.07904	-4.11867	3.81073e-05	9.52299e-05	DE	NA	NA	NA	NA	NA	NA	NA	NA	NA	NA	hypothetical protein	Hypo-rule applied	NA	NA	NA	Ga0394449_00731	k141_740	Noviherbaspirillum sp. BP10	2831285802	MEGAHIT-QMFCE002AF.10.fa
Ga0394449_00731_67556_69838	310.969	-9.25617	1.32069	-7.00857	2.40764e-12	1.44227e-11	DE	NA	NA	NA	NA	NA	NA	NA	NA	NA	NA	DNA helicase-2/ATP-dependent DNA helicase PcrA	KO:K03657	Bacteria;Proteobacteria;Betaproteobacteria;Burkholderiales;Oxalobacteraceae;Noviherbaspirillum;Noviherbaspirillum sp. Root189;Noviherbaspirillum sp. Root189	EC:3.6.4.12	KO:K03657	Ga0394449_00731	k141_740	Noviherbaspirillum sp. BP10	2831285802	MEGAHIT-QMFCE002AF.10.fa
Ga0394449_00731_69941_70507	138.038	-10.5211	1.8808	-5.59395	2.21957e-08	8.03177e-08	DE	NA	NA	NA	NA	NA	NA	NA	NA	NA	NA	RNA polymerase sigma-70 factor (ECF subfamily)	KO:K03088	Bacteria;Proteobacteria;Betaproteobacteria;Burkholderiales;Oxalobacteraceae;Noviherbaspirillum;Noviherbaspirillum autotrophicum;Noviherbaspirillum autotrophicum TSA66	NA	KO:K03088	Ga0394449_00731	k141_740	Noviherbaspirillum sp. BP10	2831285802	MEGAHIT-QMFCE002AF.10.fa
Ga0394449_00731_70504_70944	1.02907	-5.84299	3.99101	-1.46404	0.143184	NA	not_DE	NA	NA	NA	NA	NA	NA	NA	NA	NA	NA	anti-sigma factor RsiW	COG5662	Bacteria;Proteobacteria;Betaproteobacteria;Burkholderiales;Oxalobacteraceae;Noviherbaspirillum;Noviherbaspirillum autotrophicum;Noviherbaspirillum autotrophicum TSA66	NA	NA	Ga0394449_00731	k141_740	Noviherbaspirillum sp. BP10	2831285802	MEGAHIT-QMFCE002AF.10.fa
Ga0394449_00731_70941_71411	149.188	-12.2349	1.90304	-6.42911	1.28353e-10	5.89794e-10	DE	NA	NA	NA	NA	NA	NA	NA	NA	NA	NA	Na+-transporting NADH:ubiquinone oxidoreductase subunit NqrC	COG2869	Bacteria;Proteobacteria;Betaproteobacteria;Burkholderiales;Oxalobacteraceae;Noviherbaspirillum;Noviherbaspirillum autotrophicum;Noviherbaspirillum autotrophicum TSA66	NA	NA	Ga0394449_00731	k141_740	Noviherbaspirillum sp. BP10	2831285802	MEGAHIT-QMFCE002AF.10.fa
Ga0394449_00731_71513_71992	611.303	-12.071	1.80782	-6.6771	2.43718e-11	1.26334e-10	DE	NA	28.0175	NA	NA	NA	NA	28.0175	NA	3	0	hypothetical protein	Hypo-rule applied	Bacteria;Proteobacteria;Betaproteobacteria;Burkholderiales;Oxalobacteraceae;Noviherbaspirillum;Noviherbaspirillum autotrophicum;Noviherbaspirillum autotrophicum TSA66	NA	NA	Ga0394449_00731	k141_740	Noviherbaspirillum sp. BP10	2831285802	MEGAHIT-QMFCE002AF.10.fa
Ga0394449_00731_72025_73248	995.176	-10.2532	1.2457	-8.23089	1.85831e-16	1.85384e-15	DE	NA	NA	NA	NA	NA	NA	NA	NA	NA	NA	HD-GYP domain-containing protein (c-di-GMP phosphodiesterase class II)	COG2206	Bacteria;Proteobacteria;Betaproteobacteria;Burkholderiales;Oxalobacteraceae;Noviherbaspirillum;Noviherbaspirillum sp. Root189;Noviherbaspirillum sp. Root189	NA	NA	Ga0394449_00731	k141_740	Noviherbaspirillum sp. BP10	2831285802	MEGAHIT-QMFCE002AF.10.fa
Ga0394449_00731_73425_74231	86.9026	-9.37926	2.07745	-4.51479	6.33791e-06	1.72688e-05	DE	NA	NA	NA	NA	NA	NA	NA	NA	NA	NA	hypothetical protein	Hypo-rule applied	Bacteria;Proteobacteria;Betaproteobacteria;Burkholderiales;Oxalobacteraceae;Noviherbaspirillum;Noviherbaspirillum sp. Root189;Noviherbaspirillum sp. Root189	NA	NA	Ga0394449_00731	k141_740	Noviherbaspirillum sp. BP10	2831285802	MEGAHIT-QMFCE002AF.10.fa
Ga0394449_00731_74234_75190	291.2	-12.1218	2.73795	-4.42731	9.54153e-06	2.54342e-05	DE	NA	NA	NA	NA	NA	NA	NA	NA	NA	NA	homoserine kinase type II	KO:K02204	Bacteria;Proteobacteria;Betaproteobacteria;Burkholderiales;Oxalobacteraceae;Noviherbaspirillum;Noviherbaspirillum denitrificans;Noviherbaspirillum denitrificans TSA40	EC:2.7.1.39	KO:K02204	Ga0394449_00731	k141_740	Noviherbaspirillum sp. BP10	2831285802	MEGAHIT-QMFCE002AF.10.fa
Ga0394449_00731_75228_75611	4.62433	-7.54175	3.91058	-1.92855	0.053787	0.0707776	not_DE	NA	NA	NA	NA	NA	NA	NA	NA	NA	NA	hypothetical protein	Hypo-rule applied	Bacteria;Proteobacteria;Betaproteobacteria;Burkholderiales;Oxalobacteraceae;Noviherbaspirillum;Noviherbaspirillum denitrificans;Noviherbaspirillum denitrificans TSA40	NA	NA	Ga0394449_00731	k141_740	Noviherbaspirillum sp. BP10	2831285802	MEGAHIT-QMFCE002AF.10.fa
Ga0394449_00731_75589_75729	3.95245	-4.01614	3.82917	-1.04883	0.294257	0.323477	not_DE	NA	NA	NA	NA	NA	NA	NA	NA	NA	NA	hypothetical protein	Hypo-rule applied	NA	NA	NA	Ga0394449_00731	k141_740	Noviherbaspirillum sp. BP10	2831285802	MEGAHIT-QMFCE002AF.10.fa
Ga0394449_00731_75798_76535	165.595	-10.0562	2.85649	-3.52045	0.00043081	0.000912196	DE	NA	NA	NA	NA	NA	NA	NA	NA	NA	NA	hypothetical protein	KO:K06966	Bacteria;Proteobacteria;Betaproteobacteria;Burkholderiales;Oxalobacteraceae;Noviherbaspirillum;Noviherbaspirillum denitrificans;Noviherbaspirillum denitrificans TSA40	NA	KO:K06966	Ga0394449_00731	k141_740	Noviherbaspirillum sp. BP10	2831285802	MEGAHIT-QMFCE002AF.10.fa
Ga0394449_00731_76536_79280	295.196	-13.8451	2.12875	-6.50385	7.8289e-11	3.67086e-10	DE	NA	NA	NA	NA	NA	NA	NA	NA	NA	NA	DNA polymerase-1	KO:K02335	Bacteria;Proteobacteria;Betaproteobacteria;Burkholderiales;Oxalobacteraceae;Noviherbaspirillum;Noviherbaspirillum autotrophicum;Noviherbaspirillum autotrophicum TSA66	EC:2.7.7.7	KO:K02335	Ga0394449_00731	k141_740	Noviherbaspirillum sp. BP10	2831285802	MEGAHIT-QMFCE002AF.10.fa
Ga0394449_00731_7780_8616	30.7502	-10.4424	2.72146	-3.83705	0.000124521	0.000288757	DE	NA	NA	NA	NA	NA	NA	NA	NA	NA	NA	putative spermidine/putrescine transport system permease protein	KO:K02053	Bacteria;Proteobacteria;Betaproteobacteria;Burkholderiales;Oxalobacteraceae;Noviherbaspirillum;Noviherbaspirillum autotrophicum;Noviherbaspirillum autotrophicum TSA66	NA	KO:K02053	Ga0394449_00731	k141_740	Noviherbaspirillum sp. BP10	2831285802	MEGAHIT-QMFCE002AF.10.fa
Ga0394449_00731_79374_80210	178.081	-10.6019	1.87745	-5.64698	1.63288e-08	6.01368e-08	DE	NA	NA	NA	NA	NA	NA	NA	NA	NA	NA	L-ascorbate metabolism protein UlaG (beta-lactamase superfamily)	COG2220	Bacteria;Proteobacteria;Betaproteobacteria;Burkholderiales;Oxalobacteraceae;Duganella;Duganella sp. CF517;Duganella sp. CF517	NA	NA	Ga0394449_00731	k141_740	Noviherbaspirillum sp. BP10	2831285802	MEGAHIT-QMFCE002AF.10.fa
Ga0394449_00731_802_1023	36.0399	-7.04901	3.66701	-1.92228	0.0545707	0.0717393	not_DE	NA	NA	NA	NA	NA	NA	NA	NA	NA	NA	putative transposase	KO:K07497	Bacteria;Proteobacteria;Betaproteobacteria;Burkholderiales;Oxalobacteraceae;Noviherbaspirillum;Noviherbaspirillum sp. Root189;Noviherbaspirillum sp. Root189	NA	KO:K07497	Ga0394449_00731	k141_740	Noviherbaspirillum sp. BP10	2831285802	MEGAHIT-QMFCE002AF.10.fa
Ga0394449_00731_80327_81172	265.632	-10.9537	2.18545	-5.01211	5.38359e-07	1.66044e-06	DE	NA	NA	NA	NA	NA	NA	NA	NA	NA	NA	zinc and cadmium transporter	KO:K16267	Bacteria;Proteobacteria;Betaproteobacteria;Burkholderiales;Oxalobacteraceae;Noviherbaspirillum;Noviherbaspirillum sp. Root189;Noviherbaspirillum sp. Root189	NA	KO:K16267	Ga0394449_00731	k141_740	Noviherbaspirillum sp. BP10	2831285802	MEGAHIT-QMFCE002AF.10.fa
Ga0394449_00731_81180_82034	81.3245	-11.6712	1.89807	-6.14899	7.79802e-10	3.29064e-09	DE	NA	NA	NA	NA	NA	NA	NA	NA	NA	NA	thiosulfate/3-mercaptopyruvate sulfurtransferase	KO:K01011	Bacteria;Proteobacteria;Betaproteobacteria;Burkholderiales;Oxalobacteraceae;Noviherbaspirillum;Noviherbaspirillum autotrophicum;Noviherbaspirillum autotrophicum TSA66	EC:2.8.1.1,EC:2.8.1.2	KO:K01011	Ga0394449_00731	k141_740	Noviherbaspirillum sp. BP10	2831285802	MEGAHIT-QMFCE002AF.10.fa
Ga0394449_00731_82041_82970	156.939	-9.05505	1.92355	-4.70747	2.50813e-06	7.14407e-06	DE	NA	NA	NA	NA	NA	NA	NA	NA	NA	NA	S-adenosylmethionine uptake transporter	KO:K15270	Bacteria;Proteobacteria;Betaproteobacteria;Burkholderiales;Oxalobacteraceae;Noviherbaspirillum;Noviherbaspirillum denitrificans;Noviherbaspirillum denitrificans TSA40	NA	KO:K15270	Ga0394449_00731	k141_740	Noviherbaspirillum sp. BP10	2831285802	MEGAHIT-QMFCE002AF.10.fa
Ga0394449_00731_83094_84194	369.37	-10.5316	1.85158	-5.6879	1.28611e-08	4.80411e-08	DE	NA	NA	NA	NA	NA	NA	NA	NA	NA	NA	choline monooxygenase	KO:K00499	Bacteria;Proteobacteria;Betaproteobacteria;Burkholderiales;Oxalobacteraceae;Noviherbaspirillum;Noviherbaspirillum denitrificans;Noviherbaspirillum denitrificans TSA40	EC:1.14.15.7	KO:K00499	Ga0394449_00731	k141_740	Noviherbaspirillum sp. BP10	2831285802	MEGAHIT-QMFCE002AF.10.fa
Ga0394449_00731_84579_84833	156.081	-9.92151	1.91001	-5.19447	2.05302e-07	6.64927e-07	DE	NA	NA	NA	NA	NA	NA	NA	NA	NA	NA	exodeoxyribonuclease VII small subunit	KO:K03602	Bacteria;Proteobacteria;Betaproteobacteria;Burkholderiales;Oxalobacteraceae;Noviherbaspirillum;Noviherbaspirillum denitrificans;Noviherbaspirillum denitrificans TSA40	EC:3.1.11.6	KO:K03602	Ga0394449_00731	k141_740	Noviherbaspirillum sp. BP10	2831285802	MEGAHIT-QMFCE002AF.10.fa
Ga0394449_00731_84830_85729	186.644	-10.357	1.37883	-7.51142	5.84902e-14	4.30716e-13	DE	NA	NA	NA	NA	NA	NA	NA	NA	NA	NA	farnesyl diphosphate synthase	KO:K00795	Bacteria;Proteobacteria;Betaproteobacteria;Burkholderiales;Oxalobacteraceae;Noviherbaspirillum;Noviherbaspirillum autotrophicum;Noviherbaspirillum autotrophicum TSA66	EC:2.5.1.1,EC:2.5.1.10	KO:K00795	Ga0394449_00731	k141_740	Noviherbaspirillum sp. BP10	2831285802	MEGAHIT-QMFCE002AF.10.fa
Ga0394449_00731_85736_87601	212.734	-9.0039	2.12524	-4.23665	2.26883e-05	5.82778e-05	DE	NA	NA	NA	NA	NA	NA	NA	NA	NA	NA	1-deoxy-D-xylulose-5-phosphate synthase	KO:K01662	Bacteria;Proteobacteria;Betaproteobacteria;Burkholderiales;Oxalobacteraceae;Noviherbaspirillum;Noviherbaspirillum massiliense;Noviherbaspirillum massiliense JC206	EC:2.2.1.7	KO:K01662	Ga0394449_00731	k141_740	Noviherbaspirillum sp. BP10	2831285802	MEGAHIT-QMFCE002AF.10.fa
Ga0394449_00731_8635_10089	40.8656	-10.8273	2.93939	-3.68352	0.000230038	0.000511295	DE	NA	NA	NA	NA	NA	NA	NA	NA	NA	NA	succinate-semialdehyde dehydrogenase/glutarate-semialdehyde dehydrogenase	KO:K00135	Bacteria;Proteobacteria;Betaproteobacteria;Burkholderiales;Oxalobacteraceae;Noviherbaspirillum;Noviherbaspirillum autotrophicum;Noviherbaspirillum autotrophicum TSA66	EC:1.2.1.16,EC:1.2.1.20,EC:1.2.1.79	KO:K00135	Ga0394449_00731	k141_740	Noviherbaspirillum sp. BP10	2831285802	MEGAHIT-QMFCE002AF.10.fa
Ga0394449_00731_87655_88461	163.205	-9.71672	1.86056	-5.22247	1.76552e-07	5.76816e-07	DE	NA	NA	NA	NA	NA	NA	NA	NA	NA	NA	GTP cyclohydrolase I	KO:K09007	Bacteria;Proteobacteria;Betaproteobacteria;Burkholderiales;Oxalobacteraceae;Noviherbaspirillum;Noviherbaspirillum autotrophicum;Noviherbaspirillum autotrophicum TSA66	EC:3.5.4.16	KO:K09007	Ga0394449_00731	k141_740	Noviherbaspirillum sp. BP10	2831285802	MEGAHIT-QMFCE002AF.10.fa
Ga0394449_00731_88529_89086	73.3054	-8.84788	3.04472	-2.90598	0.00366107	0.00672586	DE	NA	23.6926	NA	NA	NA	NA	NA	23.6926	0	3	cob(I)alamin adenosyltransferase	KO:K00798	Bacteria;Proteobacteria;Betaproteobacteria;Burkholderiales;Oxalobacteraceae;Noviherbaspirillum;Noviherbaspirillum denitrificans;Noviherbaspirillum denitrificans TSA40	EC:2.5.1.17	KO:K00798	Ga0394449_00731	k141_740	Noviherbaspirillum sp. BP10	2831285802	MEGAHIT-QMFCE002AF.10.fa
Ga0394449_00731_89211_90620	100.78	-10.9056	1.85784	-5.87003	4.35722e-09	1.70521e-08	DE	NA	NA	NA	NA	NA	NA	NA	NA	NA	NA	D-lactate dehydrogenase (cytochrome)	KO:K00102	Bacteria;Proteobacteria;Betaproteobacteria;Burkholderiales;Oxalobacteraceae;Noviherbaspirillum;Noviherbaspirillum sp. Root189;Noviherbaspirillum sp. Root189	EC:1.1.2.4	KO:K00102	Ga0394449_00731	k141_740	Noviherbaspirillum sp. BP10	2831285802	MEGAHIT-QMFCE002AF.10.fa
Ga0394449_00731_90805_91665	61.8098	-11.3719	3.35352	-3.39104	0.000696289	0.00142444	DE	NA	NA	NA	NA	NA	NA	NA	NA	NA	NA	DNA-binding transcriptional LysR family regulator	COG0583	Bacteria;Proteobacteria;Betaproteobacteria;Burkholderiales;Oxalobacteraceae;Noviherbaspirillum;Noviherbaspirillum denitrificans;Noviherbaspirillum denitrificans TSA40	NA	NA	Ga0394449_00731	k141_740	Noviherbaspirillum sp. BP10	2831285802	MEGAHIT-QMFCE002AF.10.fa
Ga0394449_00731_91969_93456	436.309	-8.1181	2.43425	-3.33495	0.000853162	0.00171344	DE	NA	NA	NA	NA	NA	NA	NA	NA	NA	NA	glycolate oxidase	KO:K00104	Bacteria;Proteobacteria;Betaproteobacteria;Burkholderiales;Oxalobacteraceae;Noviherbaspirillum;Noviherbaspirillum autotrophicum;Noviherbaspirillum autotrophicum TSA66	EC:1.1.3.15	KO:K00104	Ga0394449_00731	k141_740	Noviherbaspirillum sp. BP10	2831285802	MEGAHIT-QMFCE002AF.10.fa
Ga0394449_00731_93465_94532	60.1466	-10.9696	1.71742	-6.38729	1.68856e-10	7.66706e-10	DE	NA	NA	NA	NA	NA	NA	NA	NA	NA	NA	glycolate oxidase FAD binding subunit	KO:K11472	Bacteria;Proteobacteria;Betaproteobacteria;Burkholderiales;Oxalobacteraceae;Noviherbaspirillum;Noviherbaspirillum sp. Root189;Noviherbaspirillum sp. Root189	NA	KO:K11472	Ga0394449_00731	k141_740	Noviherbaspirillum sp. BP10	2831285802	MEGAHIT-QMFCE002AF.10.fa
Ga0394449_00731_94535_95767	144.464	-12.8728	1.96435	-6.55322	5.63105e-11	2.72237e-10	DE	NA	NA	NA	NA	NA	NA	NA	NA	NA	NA	glycolate oxidase iron-sulfur subunit	KO:K11473	Bacteria;Proteobacteria;Betaproteobacteria;Burkholderiales;Oxalobacteraceae;Noviherbaspirillum;Noviherbaspirillum autotrophicum;Noviherbaspirillum autotrophicum TSA66	NA	KO:K11473	Ga0394449_00731	k141_740	Noviherbaspirillum sp. BP10	2831285802	MEGAHIT-QMFCE002AF.10.fa
Ga0394449_00731_95870_95983	173.144	-8.90164	2.05936	-4.32252	1.54258e-05	4.03449e-05	DE	NA	NA	NA	NA	NA	NA	NA	NA	NA	NA	hypothetical protein	Hypo-rule applied	NA	NA	NA	Ga0394449_00731	k141_740	Noviherbaspirillum sp. BP10	2831285802	MEGAHIT-QMFCE002AF.10.fa
Ga0394449_00731_96036_96521	318.315	-7.34376	1.38698	-5.29479	1.19154e-07	3.96932e-07	DE	NA	NA	NA	NA	NA	NA	NA	NA	NA	NA	glutathione peroxidase	KO:K00432	Bacteria;Proteobacteria;Betaproteobacteria;Burkholderiales;Oxalobacteraceae;Noviherbaspirillum;Noviherbaspirillum autotrophicum;Noviherbaspirillum autotrophicum TSA66	EC:1.11.1.9	KO:K00432	Ga0394449_00731	k141_740	Noviherbaspirillum sp. BP10	2831285802	MEGAHIT-QMFCE002AF.10.fa
Ga0394449_00731_96518_97654	151.955	-11.0414	1.98353	-5.56657	2.59802e-08	9.33338e-08	DE	NA	NA	NA	NA	NA	NA	NA	NA	NA	NA	twitching motility protein PilU	KO:K02670	Bacteria;Proteobacteria;Betaproteobacteria;Burkholderiales;Oxalobacteraceae;Noviherbaspirillum;Noviherbaspirillum sp. Root189;Noviherbaspirillum sp. Root189	NA	KO:K02670	Ga0394449_00731	k141_740	Noviherbaspirillum sp. BP10	2831285802	MEGAHIT-QMFCE002AF.10.fa
Ga0394449_00731_97713_98756	177.07	-11.0004	2.35601	-4.66906	3.02585e-06	8.55025e-06	DE	NA	NA	NA	NA	NA	NA	NA	NA	0	0	twitching motility protein PilT	KO:K02669	Bacteria;Proteobacteria;Betaproteobacteria;Burkholderiales;Oxalobacteraceae;Noviherbaspirillum;Noviherbaspirillum denitrificans;Noviherbaspirillum denitrificans TSA40	NA	KO:K02669	Ga0394449_00731	k141_740	Noviherbaspirillum sp. BP10	2831285802	MEGAHIT-QMFCE002AF.10.fa
Ga0394449_00731_98836_99540	6.68561	-6.57975	2.7067	-2.43091	0.0150609	0.0241927	DE	NA	NA	NA	NA	NA	NA	NA	NA	NA	NA	hypothetical protein	KO:K06997	Bacteria;Proteobacteria;Betaproteobacteria;Burkholderiales;Oxalobacteraceae;Noviherbaspirillum;Noviherbaspirillum denitrificans;Noviherbaspirillum denitrificans TSA40	NA	KO:K06997	Ga0394449_00731	k141_740	Noviherbaspirillum sp. BP10	2831285802	MEGAHIT-QMFCE002AF.10.fa
Ga0394449_00731_99530_100354	39.7618	-9.95647	2.68213	-3.71215	0.000205505	0.000460535	DE	NA	NA	NA	NA	NA	NA	NA	NA	NA	NA	pyrroline-5-carboxylate reductase	KO:K00286	Bacteria;Proteobacteria;Betaproteobacteria;Burkholderiales;Oxalobacteraceae;Noviherbaspirillum;Noviherbaspirillum sp. Root189;Noviherbaspirillum sp. Root189	EC:1.5.1.2	KO:K00286	Ga0394449_00731	k141_740	Noviherbaspirillum sp. BP10	2831285802	MEGAHIT-QMFCE002AF.10.fa
Ga0394449_01228_10852_11769	88.5008	-12.1825	1.92129	-6.34082	2.28552e-10	1.02345e-09	DE	NA	NA	NA	NA	NA	NA	NA	NA	NA	NA	BASS family bile acid:Na+ symporter	KO:K03453	Bacteria;Proteobacteria;Betaproteobacteria;Burkholderiales;Oxalobacteraceae;Noviherbaspirillum;Noviherbaspirillum autotrophicum;Noviherbaspirillum autotrophicum TSA66	NA	KO:K03453	Ga0394449_01228	k141_1246	Noviherbaspirillum sp. BP10	2831285802	MEGAHIT-QMFCE002AF.10.fa
Ga0394449_01228_11759_11998	111.841	-12.2411	3.20071	-3.8245	0.000131038	0.000302975	DE	NA	NA	NA	NA	NA	NA	NA	NA	NA	NA	hypothetical protein	Hypo-rule applied	NA	NA	NA	Ga0394449_01228	k141_1246	Noviherbaspirillum sp. BP10	2831285802	MEGAHIT-QMFCE002AF.10.fa
Ga0394449_01228_12023_13057	799.349	-11.1879	2.05796	-5.43643	5.43575e-08	1.88522e-07	DE	NA	NA	NA	NA	NA	NA	NA	NA	NA	NA	AraC-like DNA-binding protein	COG2207	Bacteria;Proteobacteria;Betaproteobacteria;Burkholderiales;Oxalobacteraceae;Noviherbaspirillum;Noviherbaspirillum massiliense;Noviherbaspirillum massiliense JC206	NA	NA	Ga0394449_01228	k141_1246	Noviherbaspirillum sp. BP10	2831285802	MEGAHIT-QMFCE002AF.10.fa
Ga0394449_01228_13265_15421	477.239	-9.38607	2.11216	-4.44382	8.8376e-06	2.36737e-05	DE	NA	NA	NA	NA	NA	NA	NA	NA	NA	NA	carboxyl-terminal processing protease	KO:K03797	Bacteria;Proteobacteria;Betaproteobacteria;Burkholderiales;Oxalobacteraceae;Noviherbaspirillum;Noviherbaspirillum autotrophicum;Noviherbaspirillum autotrophicum TSA66	EC:3.4.21.102	KO:K03797	Ga0394449_01228	k141_1246	Noviherbaspirillum sp. BP10	2831285802	MEGAHIT-QMFCE002AF.10.fa
Ga0394449_01228_1469_2164	224.074	-13.4333	2.17508	-6.17602	6.57395e-10	2.79702e-09	DE	NA	NA	NA	NA	NA	NA	NA	NA	NA	NA	VIT1/CCC1 family predicted Fe2+/Mn2+ transporter	COG1814	Bacteria;Proteobacteria;Betaproteobacteria;Burkholderiales;Oxalobacteraceae;Noviherbaspirillum;Noviherbaspirillum massiliense;Noviherbaspirillum massiliense JC206	NA	NA	Ga0394449_01228	k141_1246	Noviherbaspirillum sp. BP10	2831285802	MEGAHIT-QMFCE002AF.10.fa
Ga0394449_01228_15729_16778	940.047	-15.5172	2.12474	-7.30313	2.81155e-13	1.9234e-12	DE	NA	NA	NA	NA	NA	NA	NA	NA	NA	NA	hypothetical protein	Hypo-rule applied	Bacteria;Proteobacteria;Deltaproteobacteria;Desulfuromonadales;Desulfuromonadaceae;Pelobacter;Pelobacter acetylenicus;Pelobacter acetylenicus DSM 3247	NA	NA	Ga0394449_01228	k141_1246	Noviherbaspirillum sp. BP10	2831285802	MEGAHIT-QMFCE002AF.10.fa
Ga0394449_01228_2201_2743	224.334	-11.5192	1.87428	-6.14592	7.94998e-10	3.35003e-09	DE	NA	NA	NA	NA	NA	NA	NA	NA	NA	NA	cytochrome b561	KO:K12262	Bacteria;Proteobacteria;Betaproteobacteria;Burkholderiales;Oxalobacteraceae;unclassified Oxalobacteraceae;Oxalobacteraceae bacterium IMCC9480;beta proteobacterium sp. IMCC9480	NA	KO:K12262	Ga0394449_01228	k141_1246	Noviherbaspirillum sp. BP10	2831285802	MEGAHIT-QMFCE002AF.10.fa
Ga0394449_01228_2891_2953	17.6013	-9.6213	2.95141	-3.2599	0.0011145	0.0021978	DE	NA	NA	NA	NA	NA	NA	NA	NA	NA	NA	toxic small RNA	ncRNA	NA	NA	NA	Ga0394449_01228	k141_1246	Noviherbaspirillum sp. BP10	2831285802	MEGAHIT-QMFCE002AF.10.fa
Ga0394449_01228_3174_4529	138.304	-9.34418	2.72282	-3.4318	0.000599599	0.00123954	DE	NA	NA	NA	NA	NA	NA	NA	NA	NA	NA	uracil-xanthine permease	TIGR00801	Bacteria;Proteobacteria;Betaproteobacteria;Burkholderiales;Oxalobacteraceae;Noviherbaspirillum;Noviherbaspirillum autotrophicum;Noviherbaspirillum autotrophicum TSA66	NA	NA	Ga0394449_01228	k141_1246	Noviherbaspirillum sp. BP10	2831285802	MEGAHIT-QMFCE002AF.10.fa
Ga0394449_01228_3_176	1.54144	-5.48982	3.99788	-1.37318	0.169696	0.190903	not_DE	NA	NA	NA	NA	NA	NA	NA	NA	NA	NA	hypothetical protein	Hypo-rule applied	NA	NA	NA	Ga0394449_01228	k141_1246	Noviherbaspirillum sp. BP10	2831285802	MEGAHIT-QMFCE002AF.10.fa
Ga0394449_01228_354_1349	197.556	-7.10412	1.69561	-4.1897	2.79318e-05	7.10015e-05	DE	NA	NA	NA	NA	NA	NA	NA	NA	NA	NA	alcohol dehydrogenase	KO:K00001	Bacteria;Proteobacteria;Betaproteobacteria;Rhodocyclales;Zoogloeaceae;Thauera;Thauera sp. 28;Thauera sp. 28	EC:1.1.1.1	KO:K00001	Ga0394449_01228	k141_1246	Noviherbaspirillum sp. BP10	2831285802	MEGAHIT-QMFCE002AF.10.fa
Ga0394449_01228_4730_4915	5.21912	3.56154	3.45707	1.03022	0.302907	0.332399	not_DE	NA	NA	NA	NA	NA	NA	NA	NA	NA	NA	hypothetical protein	Hypo-rule applied	Bacteria;Proteobacteria;Betaproteobacteria;Burkholderiales;Oxalobacteraceae;Noviherbaspirillum;Noviherbaspirillum suwonense;Noviherbaspirillum suwonense DSM 26001	NA	NA	Ga0394449_01228	k141_1246	Noviherbaspirillum sp. BP10	2831285802	MEGAHIT-QMFCE002AF.10.fa
Ga0394449_01228_5381_5509	201.311	-13.1004	3.12186	-4.19635	2.71249e-05	6.90208e-05	DE	NA	NA	NA	NA	NA	NA	NA	NA	NA	NA	hypothetical protein	Hypo-rule applied	NA	NA	NA	Ga0394449_01228	k141_1246	Noviherbaspirillum sp. BP10	2831285802	MEGAHIT-QMFCE002AF.10.fa
Ga0394449_01228_5621_5863	53.2922	-7.53539	2.71239	-2.77814	0.00546709	0.0097955	DE	NA	NA	NA	NA	NA	NA	NA	NA	NA	NA	ABC-type lipopolysaccharide export system ATPase subunit	COG1137	Bacteria;Proteobacteria;Betaproteobacteria;Burkholderiales;Oxalobacteraceae;Noviherbaspirillum;Noviherbaspirillum denitrificans;Noviherbaspirillum denitrificans TSA40	NA	NA	Ga0394449_01228	k141_1246	Noviherbaspirillum sp. BP10	2831285802	MEGAHIT-QMFCE002AF.10.fa
Ga0394449_01228_6037_7230	216.338	-10.0038	1.959	-5.10659	3.28023e-07	1.03632e-06	DE	NA	NA	NA	NA	NA	NA	NA	NA	NA	NA	MFS family permease	COG0477	Bacteria;Proteobacteria;Betaproteobacteria;Burkholderiales;Oxalobacteraceae;Noviherbaspirillum;Noviherbaspirillum autotrophicum;Noviherbaspirillum autotrophicum TSA66	NA	NA	Ga0394449_01228	k141_1246	Noviherbaspirillum sp. BP10	2831285802	MEGAHIT-QMFCE002AF.10.fa
Ga0394449_01228_7259_8926	532.437	-14.5699	2.64298	-5.51267	3.53434e-08	1.25224e-07	DE	NA	NA	NA	NA	NA	NA	NA	NA	NA	NA	streptogramin lyase	COG4257	Bacteria;Proteobacteria;Betaproteobacteria;Burkholderiales;Oxalobacteraceae;Noviherbaspirillum;Noviherbaspirillum autotrophicum;Noviherbaspirillum autotrophicum TSA66	NA	NA	Ga0394449_01228	k141_1246	Noviherbaspirillum sp. BP10	2831285802	MEGAHIT-QMFCE002AF.10.fa
Ga0394449_01228_9040_9879	172.233	-28.9905	3.51948	-8.23713	NA	NA	not_DE	NA	NA	NA	NA	NA	NA	NA	NA	NA	NA	NAD(P)-dependent dehydrogenase (short-subunit alcohol dehydrogenase family)	COG1028	Bacteria;Proteobacteria;Betaproteobacteria;Burkholderiales;Oxalobacteraceae;Noviherbaspirillum;Noviherbaspirillum autotrophicum;Noviherbaspirillum autotrophicum TSA66	NA	NA	Ga0394449_01228	k141_1246	Noviherbaspirillum sp. BP10	2831285802	MEGAHIT-QMFCE002AF.10.fa
Ga0394449_01228_9881_10855	480.237	-14.4542	2.4744	-5.8415	NA	NA	not_DE	NA	NA	NA	NA	NA	NA	NA	NA	NA	NA	UDP-glucose 4-epimerase	KO:K01784	Bacteria;Proteobacteria;Betaproteobacteria;Burkholderiales;Oxalobacteraceae;Noviherbaspirillum;Noviherbaspirillum massiliense;Noviherbaspirillum massiliense JC206	EC:5.1.3.2	KO:K01784	Ga0394449_01228	k141_1246	Noviherbaspirillum sp. BP10	2831285802	MEGAHIT-QMFCE002AF.10.fa
Ga0394449_01864_101266_102042	1682.4	-6.82	1.68015	-4.05916	4.92506e-05	0.000121131	DE	NA	24.5942	NA	NA	NA	NA	NA	24.5942	0	3	peptidyl-prolyl cis-trans isomerase C	KO:K03769	Bacteria;Proteobacteria;Betaproteobacteria;Burkholderiales;Oxalobacteraceae;Noviherbaspirillum;Noviherbaspirillum sp. Root189;Noviherbaspirillum sp. Root189	EC:5.2.1.8	KO:K03769	Ga0394449_01864	k141_1887	Noviherbaspirillum sp. BP10	2831285802	MEGAHIT-QMFCE002AF.10.fa
Ga0394449_01864_102096_102380	417.537	-8.18554	1.26817	-6.45458	1.08518e-10	5.02828e-10	DE	NA	NA	NA	NA	NA	NA	NA	NA	NA	NA	BolA protein	KO:K05527	Bacteria;Proteobacteria;Betaproteobacteria;Burkholderiales;Oxalobacteraceae;Noviherbaspirillum;Noviherbaspirillum denitrificans;Noviherbaspirillum denitrificans TSA40	NA	KO:K05527	Ga0394449_01864	k141_1887	Noviherbaspirillum sp. BP10	2831285802	MEGAHIT-QMFCE002AF.10.fa
Ga0394449_01864_102377_102997	232.151	-10.4432	2.21743	-4.70959	2.4821e-06	7.07397e-06	DE	NA	NA	NA	NA	NA	NA	NA	NA	NA	NA	intracellular septation protein	KO:K06190	Bacteria;Proteobacteria;Betaproteobacteria;Burkholderiales;Oxalobacteraceae;Noviherbaspirillum;Noviherbaspirillum autotrophicum;Noviherbaspirillum autotrophicum TSA66	NA	KO:K06190	Ga0394449_01864	k141_1887	Noviherbaspirillum sp. BP10	2831285802	MEGAHIT-QMFCE002AF.10.fa
Ga0394449_01864_103017_103415	102.328	-10.7956	1.75224	-6.16103	7.22723e-10	3.06015e-09	DE	NA	NA	NA	NA	NA	NA	NA	NA	NA	NA	peptide-methionine (R)-S-oxide reductase	KO:K07305	Bacteria;Proteobacteria;Betaproteobacteria;Burkholderiales;Oxalobacteraceae;Noviherbaspirillum;Noviherbaspirillum sp. Root189;Noviherbaspirillum sp. Root189	EC:1.8.4.12	KO:K07305	Ga0394449_01864	k141_1887	Noviherbaspirillum sp. BP10	2831285802	MEGAHIT-QMFCE002AF.10.fa
Ga0394449_01864_103412_104926	456.996	-10.7931	1.995	-5.41007	6.29988e-08	2.15835e-07	DE	NA	NA	NA	NA	NA	NA	NA	NA	NA	NA	uncharacterized protein YdiU (UPF0061 family)	COG0397	Bacteria;Proteobacteria;Betaproteobacteria;Burkholderiales;Oxalobacteraceae;Noviherbaspirillum;Noviherbaspirillum denitrificans;Noviherbaspirillum denitrificans TSA40	NA	NA	Ga0394449_01864	k141_1887	Noviherbaspirillum sp. BP10	2831285802	MEGAHIT-QMFCE002AF.10.fa
Ga0394449_01864_104942_105760	94.198	-10.276	1.75499	-5.85533	4.76065e-09	1.85676e-08	DE	NA	NA	NA	NA	NA	NA	NA	NA	NA	NA	CRP-like cAMP-binding protein	COG0664	Bacteria;Proteobacteria;Betaproteobacteria;Burkholderiales;Oxalobacteraceae;Noviherbaspirillum;Noviherbaspirillum sp. Root189;Noviherbaspirillum sp. Root189	NA	NA	Ga0394449_01864	k141_1887	Noviherbaspirillum sp. BP10	2831285802	MEGAHIT-QMFCE002AF.10.fa
Ga0394449_01864_105833_106609	436.185	-9.99652	2.08969	-4.78373	1.72074e-06	4.99562e-06	DE	NA	NA	NA	NA	NA	NA	NA	NA	NA	NA	ribulose-5-phosphate 4-epimerase/fuculose-1-phosphate aldolase	COG0235	Bacteria;Proteobacteria;Betaproteobacteria;Burkholderiales;Oxalobacteraceae;Noviherbaspirillum;Noviherbaspirillum massiliense;Noviherbaspirillum massiliense JC206	NA	NA	Ga0394449_01864	k141_1887	Noviherbaspirillum sp. BP10	2831285802	MEGAHIT-QMFCE002AF.10.fa
Ga0394449_01864_106625_107212	141.201	-12.69	2.47104	-5.1355	2.8139e-07	8.956e-07	DE	NA	NA	NA	NA	NA	NA	NA	NA	NA	NA	predicted HD phosphohydrolase	COG4341	Bacteria;Proteobacteria;Betaproteobacteria;Burkholderiales;Oxalobacteraceae;Noviherbaspirillum;Noviherbaspirillum autotrophicum;Noviherbaspirillum autotrophicum TSA66	NA	NA	Ga0394449_01864	k141_1887	Noviherbaspirillum sp. BP10	2831285802	MEGAHIT-QMFCE002AF.10.fa
Ga0394449_01864_107362_108987	3566.68	-7.14873	0.994935	-7.18512	6.71492e-13	4.3829e-12	DE	NA	NA	NA	NA	NA	NA	NA	NA	NA	NA	fatty-acyl-CoA synthase	KO:K00666	Bacteria;Proteobacteria;Betaproteobacteria;Burkholderiales;Oxalobacteraceae;Noviherbaspirillum;Noviherbaspirillum sp. Root189;Noviherbaspirillum sp. Root189	EC:6.2.1.-	KO:K00666	Ga0394449_01864	k141_1887	Noviherbaspirillum sp. BP10	2831285802	MEGAHIT-QMFCE002AF.10.fa
Ga0394449_01864_110631_111875	1101.87	-8.77641	2.27117	-3.86426	NA	NA	not_DE	NA	NA	NA	NA	NA	NA	NA	NA	NA	NA	branched-chain amino acid transport system substrate-binding protein	KO:K01999	Bacteria;Proteobacteria;Betaproteobacteria;Burkholderiales;Oxalobacteraceae;Noviherbaspirillum;Noviherbaspirillum sp. Root189;Noviherbaspirillum sp. Root189	NA	KO:K01999	Ga0394449_01864	k141_1887	Noviherbaspirillum sp. BP10	2831285802	MEGAHIT-QMFCE002AF.10.fa
Ga0394449_01864_111977_112924	182.153	-8.34735	2.84464	-2.93442	0.00334174	0.00617338	DE	NA	NA	NA	NA	NA	NA	NA	NA	NA	NA	branched-chain amino acid transport system permease protein	KO:K01997	Bacteria;Proteobacteria;Betaproteobacteria;Burkholderiales;Oxalobacteraceae;Noviherbaspirillum;Noviherbaspirillum autotrophicum;Noviherbaspirillum autotrophicum TSA66	NA	KO:K01997	Ga0394449_01864	k141_1887	Noviherbaspirillum sp. BP10	2831285802	MEGAHIT-QMFCE002AF.10.fa
Ga0394449_01864_112929_114230	390.803	-11.6852	1.7317	-6.7478	1.50104e-11	8.01164e-11	DE	NA	NA	NA	NA	NA	NA	NA	NA	NA	NA	branched-chain amino acid transport system permease protein	KO:K01998	Bacteria;Proteobacteria;Betaproteobacteria;Burkholderiales;Oxalobacteraceae;Noviherbaspirillum;Noviherbaspirillum denitrificans;Noviherbaspirillum denitrificans TSA40	NA	KO:K01998	Ga0394449_01864	k141_1887	Noviherbaspirillum sp. BP10	2831285802	MEGAHIT-QMFCE002AF.10.fa
Ga0394449_01864_12557_12790	36.1306	-10.6512	2.93433	-3.62985	0.000283587	0.000619438	DE	NA	NA	NA	NA	NA	NA	NA	NA	NA	NA	hypothetical protein	Hypo-rule applied	NA	NA	NA	Ga0394449_01864	k141_1887	Noviherbaspirillum sp. BP10	2831285802	MEGAHIT-QMFCE002AF.10.fa
Ga0394449_01864_12783_14468	284.239	-8.37871	1.44375	-5.80345	6.49626e-09	2.50426e-08	DE	NA	NA	NA	NA	NA	NA	NA	NA	NA	NA	methyl-accepting chemotaxis protein	KO:K03406	Bacteria;Proteobacteria;Betaproteobacteria;Burkholderiales;Oxalobacteraceae;Noviherbaspirillum;Noviherbaspirillum humi;Noviherbaspirillum humi U15	NA	KO:K03406	Ga0394449_01864	k141_1887	Noviherbaspirillum sp. BP10	2831285802	MEGAHIT-QMFCE002AF.10.fa
Ga0394449_01864_14746_14812	50.8262	-11.3785	1.93619	-5.87673	4.18452e-09	1.64106e-08	DE	NA	NA	NA	NA	NA	NA	NA	NA	NA	NA	toxic small RNA	ncRNA	NA	NA	NA	Ga0394449_01864	k141_1887	Noviherbaspirillum sp. BP10	2831285802	MEGAHIT-QMFCE002AF.10.fa
Ga0394449_01864_14951_15169	399.395	-14.259	2.20005	-6.48122	9.09823e-11	4.24338e-10	DE	NA	NA	NA	NA	NA	NA	NA	NA	NA	NA	hypothetical protein	Hypo-rule applied	NA	NA	NA	Ga0394449_01864	k141_1887	Noviherbaspirillum sp. BP10	2831285802	MEGAHIT-QMFCE002AF.10.fa
Ga0394449_01864_15236_18358	222.972	-13.4877	1.99729	-6.75299	1.44832e-11	7.74408e-11	DE	NA	NA	NA	NA	NA	NA	NA	NA	NA	NA	hypothetical protein	Hypo-rule applied	Bacteria;Proteobacteria;Gammaproteobacteria;Pseudomonadales;Pseudomonadaceae;Rugamonas;Rugamonas sp.;Rugamonas sp. SG757	NA	NA	Ga0394449_01864	k141_1887	Noviherbaspirillum sp. BP10	2831285802	MEGAHIT-QMFCE002AF.10.fa
Ga0394449_01864_18458_19513	49.9276	-11.2447	2.25446	-4.98773	6.10933e-07	1.87191e-06	DE	NA	NA	NA	NA	NA	NA	NA	NA	NA	NA	AraC-like DNA-binding protein	COG2207	Bacteria;Proteobacteria;Gammaproteobacteria;Nevskiales;Sinobacteraceae;Solimonas;Solimonas flava;Solimonas flava DSM 18980	NA	NA	Ga0394449_01864	k141_1887	Noviherbaspirillum sp. BP10	2831285802	MEGAHIT-QMFCE002AF.10.fa
Ga0394449_01864_19603_20343	93.813	-10.7262	2.60307	-4.1206	3.77883e-05	9.45753e-05	DE	NA	NA	NA	NA	NA	NA	NA	NA	NA	NA	hypothetical protein	Hypo-rule applied	Bacteria;Proteobacteria;Gammaproteobacteria;Nevskiales;Sinobacteraceae;Solimonas;Solimonas flava;Solimonas flava DSM 18980	NA	NA	Ga0394449_01864	k141_1887	Noviherbaspirillum sp. BP10	2831285802	MEGAHIT-QMFCE002AF.10.fa
Ga0394449_01864_20537_23716	126.461	-12.5282	2.47888	-5.054	4.32659e-07	1.34499e-06	DE	NA	NA	NA	NA	NA	NA	NA	NA	NA	NA	DNA-binding SARP family transcriptional activator	COG3629	Bacteria;Proteobacteria;Betaproteobacteria;Burkholderiales;Oxalobacteraceae;unclassified Oxalobacteraceae;Oxalobacteraceae bacterium AB_14;Oxalobacteraceae bacterium AB_14	NA	NA	Ga0394449_01864	k141_1887	Noviherbaspirillum sp. BP10	2831285802	MEGAHIT-QMFCE002AF.10.fa
Ga0394449_01864_219_908	45.7379	-8.05752	1.97224	-4.08547	4.39869e-05	0.000108975	DE	NA	NA	NA	NA	NA	NA	NA	NA	NA	NA	hypothetical protein	KO:K09939	Bacteria;Proteobacteria;Betaproteobacteria;Burkholderiales;Oxalobacteraceae;Noviherbaspirillum;Noviherbaspirillum denitrificans;Noviherbaspirillum denitrificans TSA40	NA	KO:K09939	Ga0394449_01864	k141_1887	Noviherbaspirillum sp. BP10	2831285802	MEGAHIT-QMFCE002AF.10.fa
Ga0394449_01864_23725_26673	835.481	-13.6864	2.09133	-6.54433	5.97628e-11	2.86885e-10	DE	NA	NA	NA	NA	NA	NA	NA	NA	NA	NA	diguanylate cyclase (GGDEF)-like protein/PAS domain S-box-containing protein	TIGR00254/TIGR00229	Bacteria;Proteobacteria;Betaproteobacteria;Burkholderiales;Oxalobacteraceae;Massilia;Massilia sp. Root335;Massilia sp. Root335	NA	NA	Ga0394449_01864	k141_1887	Noviherbaspirillum sp. BP10	2831285802	MEGAHIT-QMFCE002AF.10.fa
Ga0394449_01864_26841_28085	5.11165	-7.83281	3.35482	-2.33479	0.0195543	0.0302427	DE	NA	NA	NA	NA	NA	NA	NA	NA	NA	NA	hypothetical protein	Hypo-rule applied	Bacteria;Proteobacteria;Betaproteobacteria;Burkholderiales;Burkholderiaceae;Caballeronia;Caballeronia glathei;Caballeronia glathei LMG 14190	NA	NA	Ga0394449_01864	k141_1887	Noviherbaspirillum sp. BP10	2831285802	MEGAHIT-QMFCE002AF.10.fa
Ga0394449_01864_28060_28392	2.33377	-6.61951	3.89186	-1.70086	0.0889695	0.108498	not_DE	NA	NA	NA	NA	NA	NA	NA	NA	NA	NA	hypothetical protein	Hypo-rule applied	Bacteria;Proteobacteria;Betaproteobacteria;Burkholderiales;Oxalobacteraceae;Herminiimonas;Herminiimonas sp. CN;Herminiimonas sp. CN	NA	NA	Ga0394449_01864	k141_1887	Noviherbaspirillum sp. BP10	2831285802	MEGAHIT-QMFCE002AF.10.fa
Ga0394449_01864_28350_28937	6.48375	-8.17525	3.28637	-2.48762	0.01286	0.021026	DE	NA	NA	NA	NA	NA	NA	NA	NA	NA	NA	putative NADPH-quinone reductase	COG2249	Bacteria;Proteobacteria;Betaproteobacteria;Burkholderiales;Oxalobacteraceae;Noviherbaspirillum;Noviherbaspirillum autotrophicum;Noviherbaspirillum autotrophicum TSA66	NA	NA	Ga0394449_01864	k141_1887	Noviherbaspirillum sp. BP10	2831285802	MEGAHIT-QMFCE002AF.10.fa
Ga0394449_01864_29096_29695	166.885	-13.0546	2.0388	-6.40309	1.52265e-10	6.95178e-10	DE	NA	NA	NA	NA	NA	NA	NA	NA	NA	NA	AcrR family transcriptional regulator	COG1309	Bacteria;Proteobacteria;Betaproteobacteria;Burkholderiales;Burkholderiaceae;Ralstonia;Ralstonia pickettii;Ralstonia pickettii 12J	NA	NA	Ga0394449_01864	k141_1887	Noviherbaspirillum sp. BP10	2831285802	MEGAHIT-QMFCE002AF.10.fa
Ga0394449_01864_29692_32337	114.758	-12.5327	1.99538	-6.28086	3.36713e-10	1.48332e-09	DE	NA	NA	NA	NA	NA	NA	NA	NA	NA	NA	pyruvate,water dikinase	KO:K01007	Bacteria;Proteobacteria;Betaproteobacteria;Rhodocyclales;Zoogloeaceae;Azoarcus;Azoarcus sp. BH72;Azoarcus sp. BH72	EC:2.7.9.2	KO:K01007	Ga0394449_01864	k141_1887	Noviherbaspirillum sp. BP10	2831285802	MEGAHIT-QMFCE002AF.10.fa
Ga0394449_01864_3113_3532	47.5362	-6.80017	2.83286	-2.40046	0.0163743	0.0260587	DE	NA	NA	NA	NA	NA	NA	NA	NA	0	0	biopolymer transport protein ExbD	KO:K03559	Bacteria;Proteobacteria;Betaproteobacteria;Burkholderiales;Oxalobacteraceae;Noviherbaspirillum;Noviherbaspirillum autotrophicum;Noviherbaspirillum autotrophicum TSA66	NA	KO:K03559	Ga0394449_01864	k141_1887	Noviherbaspirillum sp. BP10	2831285802	MEGAHIT-QMFCE002AF.10.fa
Ga0394449_01864_32427_33362	96.6124	-12.042	3.10523	-3.87799	0.000105324	0.000247164	DE	NA	NA	NA	NA	NA	NA	NA	NA	NA	NA	uncharacterized UPF0160 family protein	COG4286	Bacteria;Proteobacteria;Betaproteobacteria;Burkholderiales;Oxalobacteraceae;Noviherbaspirillum;Noviherbaspirillum autotrophicum;Noviherbaspirillum autotrophicum TSA66	NA	NA	Ga0394449_01864	k141_1887	Noviherbaspirillum sp. BP10	2831285802	MEGAHIT-QMFCE002AF.10.fa
Ga0394449_01864_33359_35614	188.197	-10.895	2.31354	-4.70922	NA	NA	not_DE	NA	NA	NA	NA	NA	NA	NA	NA	NA	NA	DNA excision repair protein ERCC-2	KO:K10844	Bacteria;Proteobacteria;Betaproteobacteria;Burkholderiales;Oxalobacteraceae;Noviherbaspirillum;Noviherbaspirillum autotrophicum;Noviherbaspirillum autotrophicum TSA66	EC:3.6.4.12	KO:K10844	Ga0394449_01864	k141_1887	Noviherbaspirillum sp. BP10	2831285802	MEGAHIT-QMFCE002AF.10.fa
Ga0394449_01864_3529_4257	1.05308	-3.25559	3.94399	-0.825457	0.409112	NA	not_DE	NA	NA	NA	NA	NA	NA	NA	NA	NA	NA	biopolymer transport protein ExbB	KO:K03561	Bacteria;Proteobacteria;Betaproteobacteria;Burkholderiales;Oxalobacteraceae;Noviherbaspirillum;Noviherbaspirillum autotrophicum;Noviherbaspirillum autotrophicum TSA66	NA	KO:K03561	Ga0394449_01864	k141_1887	Noviherbaspirillum sp. BP10	2831285802	MEGAHIT-QMFCE002AF.10.fa
Ga0394449_01864_35611_37260	220.432	-13.4139	2.1563	-6.2208	4.94632e-10	2.14173e-09	DE	NA	NA	NA	NA	NA	NA	NA	NA	NA	NA	hypothetical protein	Hypo-rule applied	Bacteria;Proteobacteria;Betaproteobacteria;Burkholderiales;Oxalobacteraceae;Noviherbaspirillum;Noviherbaspirillum autotrophicum;Noviherbaspirillum autotrophicum TSA66	NA	NA	Ga0394449_01864	k141_1887	Noviherbaspirillum sp. BP10	2831285802	MEGAHIT-QMFCE002AF.10.fa
Ga0394449_01864_37558_38715	33.2153	-10.6085	2.38898	-4.44062	8.97018e-06	2.40159e-05	DE	NA	NA	NA	NA	NA	NA	NA	NA	NA	NA	hypothetical protein	Hypo-rule applied	Bacteria;Proteobacteria;Betaproteobacteria;Burkholderiales;Oxalobacteraceae;Noviherbaspirillum;Noviherbaspirillum autotrophicum;Noviherbaspirillum autotrophicum TSA66	NA	NA	Ga0394449_01864	k141_1887	Noviherbaspirillum sp. BP10	2831285802	MEGAHIT-QMFCE002AF.10.fa
Ga0394449_01864_38702_39511	96.2582	-12.1545	2.4015	-5.06121	4.16604e-07	1.29724e-06	DE	NA	NA	NA	NA	NA	NA	NA	NA	NA	NA	hypothetical protein	KO:K06889	Bacteria;Proteobacteria;Betaproteobacteria;Burkholderiales;Oxalobacteraceae;Noviherbaspirillum;Noviherbaspirillum autotrophicum;Noviherbaspirillum autotrophicum TSA66	NA	KO:K06889	Ga0394449_01864	k141_1887	Noviherbaspirillum sp. BP10	2831285802	MEGAHIT-QMFCE002AF.10.fa
Ga0394449_01864_39690_41153	27.8082	-10.2349	3.13701	-3.26263	0.00110383	0.00217905	DE	NA	NA	NA	NA	NA	NA	NA	NA	NA	NA	protein ImuB	KO:K14161	Bacteria;Proteobacteria;Betaproteobacteria;Burkholderiales;Oxalobacteraceae;Noviherbaspirillum;Noviherbaspirillum autotrophicum;Noviherbaspirillum autotrophicum TSA66	NA	KO:K14161	Ga0394449_01864	k141_1887	Noviherbaspirillum sp. BP10	2831285802	MEGAHIT-QMFCE002AF.10.fa
Ga0394449_01864_41171_41953	74.9233	-11.7375	2.66278	-4.40798	1.0434e-05	2.77015e-05	DE	NA	NA	NA	NA	NA	NA	NA	NA	NA	NA	protein ImuA	KO:K14160	Bacteria;Proteobacteria;Betaproteobacteria;Burkholderiales;Oxalobacteraceae;Noviherbaspirillum;Noviherbaspirillum sp. Root189;Noviherbaspirillum sp. Root189	NA	KO:K14160	Ga0394449_01864	k141_1887	Noviherbaspirillum sp. BP10	2831285802	MEGAHIT-QMFCE002AF.10.fa
Ga0394449_01864_42067_42990	148.175	-12.9311	1.90963	-6.77153	1.2743e-11	6.85285e-11	DE	NA	NA	NA	NA	NA	NA	NA	NA	NA	NA	excinuclease Cho	KO:K05984	Bacteria;Proteobacteria;Betaproteobacteria;Burkholderiales;Oxalobacteraceae;Noviherbaspirillum;Noviherbaspirillum sp. Root189;Noviherbaspirillum sp. Root189	EC:3.1.25.-	KO:K05984	Ga0394449_01864	k141_1887	Noviherbaspirillum sp. BP10	2831285802	MEGAHIT-QMFCE002AF.10.fa
Ga0394449_01864_43059_43142	0.0030371	-3.89629	4.02109	-0.968965	0.332562	NA	not_DE	NA	NA	NA	NA	NA	NA	NA	NA	NA	NA	hypothetical protein	Hypo-rule applied	NA	NA	NA	Ga0394449_01864	k141_1887	Noviherbaspirillum sp. BP10	2831285802	MEGAHIT-QMFCE002AF.10.fa
Ga0394449_01864_43141_43572	1.02907	-5.84299	3.99101	-1.46404	0.143184	NA	not_DE	NA	NA	NA	NA	NA	NA	NA	NA	NA	NA	hypothetical protein	Hypo-rule applied	Bacteria;Proteobacteria;Betaproteobacteria;Burkholderiales;Oxalobacteraceae;Noviherbaspirillum;Noviherbaspirillum sp. Root189;Noviherbaspirillum sp. Root189	NA	NA	Ga0394449_01864	k141_1887	Noviherbaspirillum sp. BP10	2831285802	MEGAHIT-QMFCE002AF.10.fa
Ga0394449_01864_43826_45535	57.4714	-6.42559	2.09638	-3.0651	0.002176	0.00411139	DE	NA	NA	NA	NA	NA	NA	NA	NA	NA	NA	diguanylate cyclase (GGDEF)-like protein	TIGR00254	Bacteria;Proteobacteria;Betaproteobacteria;Burkholderiales;Oxalobacteraceae;Noviherbaspirillum;Noviherbaspirillum autotrophicum;Noviherbaspirillum autotrophicum TSA66	NA	NA	Ga0394449_01864	k141_1887	Noviherbaspirillum sp. BP10	2831285802	MEGAHIT-QMFCE002AF.10.fa
Ga0394449_01864_45659_48808	474.318	-13.9021	1.89393	-7.34032	2.13083e-13	1.47528e-12	DE	NA	NA	NA	NA	NA	NA	NA	NA	NA	NA	diguanylate cyclase (GGDEF)-like protein/PAS domain S-box-containing protein	TIGR00254/TIGR00229	Bacteria;Proteobacteria;Betaproteobacteria;Burkholderiales;Oxalobacteraceae;Noviherbaspirillum;Noviherbaspirillum denitrificans;Noviherbaspirillum denitrificans TSA40	NA	NA	Ga0394449_01864	k141_1887	Noviherbaspirillum sp. BP10	2831285802	MEGAHIT-QMFCE002AF.10.fa
Ga0394449_01864_48812_50479	391.789	-14.2212	2.23332	-6.36774	1.91834e-10	8.66036e-10	DE	NA	NA	NA	NA	NA	NA	NA	NA	NA	NA	ATP-dependent DNA helicase RecQ	KO:K03654	Bacteria;Proteobacteria;Betaproteobacteria;Burkholderiales;Oxalobacteraceae;Noviherbaspirillum;Noviherbaspirillum autotrophicum;Noviherbaspirillum autotrophicum TSA66	EC:3.6.4.12	KO:K03654	Ga0394449_01864	k141_1887	Noviherbaspirillum sp. BP10	2831285802	MEGAHIT-QMFCE002AF.10.fa
Ga0394449_01864_51125_52150	49.8653	-11.0646	3.3253	-3.32738	0.000876658	0.00175567	DE	NA	NA	NA	NA	NA	NA	NA	NA	NA	NA	propanol-preferring alcohol dehydrogenase	KO:K13953	Bacteria;Proteobacteria;Betaproteobacteria;Burkholderiales;Oxalobacteraceae;Noviherbaspirillum;Noviherbaspirillum autotrophicum;Noviherbaspirillum autotrophicum TSA66	EC:1.1.1.1	KO:K13953	Ga0394449_01864	k141_1887	Noviherbaspirillum sp. BP10	2831285802	MEGAHIT-QMFCE002AF.10.fa
Ga0394449_01864_52269_53618	613.849	-12.1598	1.93121	-6.29644	3.04554e-10	1.35002e-09	DE	NA	NA	NA	NA	NA	NA	NA	NA	NA	NA	methyl-accepting chemotaxis protein	KO:K03406	Bacteria;Proteobacteria;Betaproteobacteria;Burkholderiales;Oxalobacteraceae;Noviherbaspirillum;Noviherbaspirillum denitrificans;Noviherbaspirillum denitrificans TSA40	NA	KO:K03406	Ga0394449_01864	k141_1887	Noviherbaspirillum sp. BP10	2831285802	MEGAHIT-QMFCE002AF.10.fa
Ga0394449_01864_5235_5882	40.0499	-11.0195	1.99466	-5.52451	3.30413e-08	1.17485e-07	DE	NA	NA	NA	NA	NA	NA	NA	NA	NA	NA	hypothetical protein	KO:K07226	Bacteria;Proteobacteria;Betaproteobacteria;Burkholderiales;Oxalobacteraceae;Noviherbaspirillum;Noviherbaspirillum autotrophicum;Noviherbaspirillum autotrophicum TSA66	NA	KO:K07226	Ga0394449_01864	k141_1887	Noviherbaspirillum sp. BP10	2831285802	MEGAHIT-QMFCE002AF.10.fa
Ga0394449_01864_53679_54146	482.05	-9.00326	2.08761	-4.3127	1.6127e-05	4.20682e-05	DE	NA	NA	NA	NA	NA	NA	NA	NA	0	0	signal transduction histidine kinase	COG4564	Bacteria;Proteobacteria;Betaproteobacteria;Burkholderiales;Oxalobacteraceae;Noviherbaspirillum;Noviherbaspirillum autotrophicum;Noviherbaspirillum autotrophicum TSA66	NA	NA	Ga0394449_01864	k141_1887	Noviherbaspirillum sp. BP10	2831285802	MEGAHIT-QMFCE002AF.10.fa
Ga0394449_01864_54426_55331	103.167	-12.1487	3.02479	-4.01638	5.90979e-05	0.000143834	DE	NA	NA	NA	NA	NA	NA	NA	NA	NA	NA	DNA-binding transcriptional LysR family regulator	COG0583	Bacteria;Proteobacteria;Betaproteobacteria;Burkholderiales;Oxalobacteraceae;Noviherbaspirillum;Noviherbaspirillum autotrophicum;Noviherbaspirillum autotrophicum TSA66	NA	NA	Ga0394449_01864	k141_1887	Noviherbaspirillum sp. BP10	2831285802	MEGAHIT-QMFCE002AF.10.fa
Ga0394449_01864_55451_56140	26.9718	-10.1831	3.26182	-3.12189	0.00179691	0.00343291	DE	NA	NA	NA	NA	NA	NA	NA	NA	NA	NA	2-haloacid dehalogenase	KO:K01560	Bacteria;Proteobacteria;Betaproteobacteria;Burkholderiales;Oxalobacteraceae;Noviherbaspirillum;Noviherbaspirillum denitrificans;Noviherbaspirillum denitrificans TSA40	EC:3.8.1.2	KO:K01560	Ga0394449_01864	k141_1887	Noviherbaspirillum sp. BP10	2831285802	MEGAHIT-QMFCE002AF.10.fa
Ga0394449_01864_56137_56895	241.034	-13.4483	2.52919	-5.31725	NA	NA	not_DE	NA	NA	NA	NA	NA	NA	NA	NA	NA	NA	hypothetical protein	KO:K07090	Bacteria;Proteobacteria;Betaproteobacteria;Burkholderiales;Oxalobacteraceae;Noviherbaspirillum;Noviherbaspirillum denitrificans;Noviherbaspirillum denitrificans TSA40	NA	KO:K07090	Ga0394449_01864	k141_1887	Noviherbaspirillum sp. BP10	2831285802	MEGAHIT-QMFCE002AF.10.fa
Ga0394449_01864_57115_57339	79.8924	-11.7579	3.17061	-3.70842	0.000208557	0.000466606	DE	NA	NA	NA	NA	NA	NA	NA	NA	NA	NA	hypothetical protein	Hypo-rule applied	Bacteria;Proteobacteria;Betaproteobacteria;Burkholderiales;Oxalobacteraceae;Noviherbaspirillum;Noviherbaspirillum denitrificans;Noviherbaspirillum denitrificans TSA40	NA	NA	Ga0394449_01864	k141_1887	Noviherbaspirillum sp. BP10	2831285802	MEGAHIT-QMFCE002AF.10.fa
Ga0394449_01864_57336_57710	28.3819	-10.2906	2.99769	-3.43285	0.000597275	0.00123525	DE	NA	NA	NA	NA	NA	NA	NA	NA	NA	NA	death-on-curing protein	KO:K07341	Bacteria;Proteobacteria;Betaproteobacteria;Burkholderiales;Oxalobacteraceae;Noviherbaspirillum;Noviherbaspirillum denitrificans;Noviherbaspirillum denitrificans TSA40	NA	KO:K07341	Ga0394449_01864	k141_1887	Noviherbaspirillum sp. BP10	2831285802	MEGAHIT-QMFCE002AF.10.fa
Ga0394449_01864_57838_58440	166.039	-12.8972	2.59686	-4.96645	6.81905e-07	2.07913e-06	DE	NA	NA	NA	NA	NA	NA	NA	NA	NA	NA	MarC family membrane protein	TIGR00427	Bacteria;Proteobacteria;Betaproteobacteria;Burkholderiales;Oxalobacteraceae;Noviherbaspirillum;Noviherbaspirillum sp. Root189;Noviherbaspirillum sp. Root189	NA	NA	Ga0394449_01864	k141_1887	Noviherbaspirillum sp. BP10	2831285802	MEGAHIT-QMFCE002AF.10.fa
Ga0394449_01864_58503_60809	363.999	-14.0573	2.46175	-5.71028	1.12789e-08	4.24172e-08	DE	NA	NA	NA	NA	NA	NA	NA	NA	NA	NA	isoquinoline 1-oxidoreductase beta subunit	KO:K07303	Bacteria;Proteobacteria;Betaproteobacteria;Burkholderiales;Oxalobacteraceae;Noviherbaspirillum;Noviherbaspirillum sp. Root189;Noviherbaspirillum sp. Root189	EC:1.3.99.16	KO:K07303	Ga0394449_01864	k141_1887	Noviherbaspirillum sp. BP10	2831285802	MEGAHIT-QMFCE002AF.10.fa
Ga0394449_01864_6013_6828	214.021	-13.41	2.04529	-6.55655	5.50661e-11	2.66666e-10	DE	NA	NA	NA	NA	NA	NA	NA	NA	NA	NA	pimeloyl-ACP methyl ester carboxylesterase	COG0596	Bacteria;Proteobacteria;Betaproteobacteria;Burkholderiales;Oxalobacteraceae;Duganella;Duganella sp. Root336D2;Duganella sp. Root336D2	NA	NA	Ga0394449_01864	k141_1887	Noviherbaspirillum sp. BP10	2831285802	MEGAHIT-QMFCE002AF.10.fa
Ga0394449_01864_60806_61237	67.8396	-6.63277	2.81275	-2.35811	0.0183682	0.0286307	DE	NA	NA	NA	NA	NA	NA	NA	NA	NA	NA	thiol-disulfide isomerase/thioredoxin	COG0526	Bacteria;Proteobacteria;Betaproteobacteria;Burkholderiales;Oxalobacteraceae;Noviherbaspirillum;Noviherbaspirillum autotrophicum;Noviherbaspirillum autotrophicum TSA66	NA	NA	Ga0394449_01864	k141_1887	Noviherbaspirillum sp. BP10	2831285802	MEGAHIT-QMFCE002AF.10.fa
Ga0394449_01864_61361_61558	31.8709	-10.4493	3.0113	-3.47002	0.000520412	0.0010853	DE	NA	NA	NA	NA	NA	NA	NA	NA	NA	NA	hypothetical protein	Hypo-rule applied	Bacteria;Proteobacteria;Betaproteobacteria;Burkholderiales;Oxalobacteraceae;Noviherbaspirillum;Noviherbaspirillum denitrificans;Noviherbaspirillum denitrificans TSA40	NA	NA	Ga0394449_01864	k141_1887	Noviherbaspirillum sp. BP10	2831285802	MEGAHIT-QMFCE002AF.10.fa
Ga0394449_01864_61704_62393	113.925	-11.8463	1.89356	-6.25607	3.94804e-10	1.72853e-09	DE	NA	NA	NA	NA	NA	NA	NA	NA	NA	NA	tRNA threonylcarbamoyladenosine biosynthesis protein TsaB	KO:K14742	Bacteria;Proteobacteria;Betaproteobacteria;Burkholderiales;Oxalobacteraceae;Noviherbaspirillum;Noviherbaspirillum autotrophicum;Noviherbaspirillum autotrophicum TSA66	NA	KO:K14742	Ga0394449_01864	k141_1887	Noviherbaspirillum sp. BP10	2831285802	MEGAHIT-QMFCE002AF.10.fa
Ga0394449_01864_62390_62881	273.305	-13.5218	3.28805	-4.11242	3.91535e-05	9.77301e-05	DE	NA	NA	NA	NA	NA	NA	NA	NA	NA	NA	ribosomal-protein-alanine N-acetyltransferase	KO:K03789	Bacteria;Proteobacteria;Betaproteobacteria;Burkholderiales;Oxalobacteraceae;Noviherbaspirillum;Noviherbaspirillum sp. Root189;Noviherbaspirillum sp. Root189	EC:2.3.1.128	KO:K03789	Ga0394449_01864	k141_1887	Noviherbaspirillum sp. BP10	2831285802	MEGAHIT-QMFCE002AF.10.fa
Ga0394449_01864_62878_63681	95.7133	-9.43298	1.97568	-4.77455	1.8011e-06	5.21776e-06	DE	NA	NA	NA	NA	NA	NA	NA	NA	NA	NA	DNA polymerase	KO:K02334	Bacteria;Proteobacteria;Betaproteobacteria;Burkholderiales;Oxalobacteraceae;Noviherbaspirillum;Noviherbaspirillum autotrophicum;Noviherbaspirillum autotrophicum TSA66	EC:2.7.7.7	KO:K02334	Ga0394449_01864	k141_1887	Noviherbaspirillum sp. BP10	2831285802	MEGAHIT-QMFCE002AF.10.fa
Ga0394449_01864_63665_64630	32.461	-7.9318	2.61568	-3.03241	0.00242611	0.00456143	DE	NA	NA	NA	NA	NA	NA	NA	NA	NA	NA	hypothetical protein	KO:K09977	Bacteria;Proteobacteria;Betaproteobacteria;Burkholderiales;Oxalobacteraceae;Noviherbaspirillum;Noviherbaspirillum autotrophicum;Noviherbaspirillum autotrophicum TSA66	NA	KO:K09977	Ga0394449_01864	k141_1887	Noviherbaspirillum sp. BP10	2831285802	MEGAHIT-QMFCE002AF.10.fa
Ga0394449_01864_64662_65930	195.873	-10.2355	2.86618	-3.57112	0.000355452	0.000763347	DE	NA	NA	NA	NA	NA	NA	NA	NA	NA	NA	MFS family permease	COG0477	Bacteria;Proteobacteria;Betaproteobacteria;Burkholderiales;Oxalobacteraceae;Noviherbaspirillum;Noviherbaspirillum sp. Root189;Noviherbaspirillum sp. Root189	NA	NA	Ga0394449_01864	k141_1887	Noviherbaspirillum sp. BP10	2831285802	MEGAHIT-QMFCE002AF.10.fa
Ga0394449_01864_66028_67158	71.8169	-7.07403	2.13465	-3.31391	0.000920019	0.00183598	DE	NA	NA	NA	NA	NA	NA	NA	NA	NA	NA	alanine racemase	KO:K01775	Bacteria;Proteobacteria;Betaproteobacteria;Burkholderiales;Oxalobacteraceae;Noviherbaspirillum;Noviherbaspirillum autotrophicum;Noviherbaspirillum autotrophicum TSA66	EC:5.1.1.1	KO:K01775	Ga0394449_01864	k141_1887	Noviherbaspirillum sp. BP10	2831285802	MEGAHIT-QMFCE002AF.10.fa
Ga0394449_01864_67172_68542	217.75	-10.4744	2.01326	-5.2027	1.96417e-07	6.37118e-07	DE	NA	NA	NA	NA	NA	NA	NA	NA	NA	NA	DNA repair protein RadA/Sms	KO:K04485	Bacteria;Proteobacteria;Betaproteobacteria;Burkholderiales;Oxalobacteraceae;Noviherbaspirillum;Noviherbaspirillum sp. Root189;Noviherbaspirillum sp. Root189	NA	KO:K04485	Ga0394449_01864	k141_1887	Noviherbaspirillum sp. BP10	2831285802	MEGAHIT-QMFCE002AF.10.fa
Ga0394449_01864_68546_69859	105.37	-8.45445	2.18376	-3.87151	0.000108163	0.000253581	DE	NA	NA	NA	NA	NA	NA	NA	NA	NA	NA	squalene-associated FAD-dependent desaturase	TIGR03467	Bacteria;Proteobacteria;Betaproteobacteria;Burkholderiales;Oxalobacteraceae;Noviherbaspirillum;Noviherbaspirillum autotrophicum;Noviherbaspirillum autotrophicum TSA66	NA	NA	Ga0394449_01864	k141_1887	Noviherbaspirillum sp. BP10	2831285802	MEGAHIT-QMFCE002AF.10.fa
Ga0394449_01864_6894_7121	38.8195	-10.6642	3.86041	-2.76245	0.00573686	0.0102261	DE	NA	NA	NA	NA	NA	NA	NA	NA	NA	NA	hypothetical protein	Hypo-rule applied	Bacteria;Proteobacteria;Betaproteobacteria;Nitrosomonadales;Thiobacillaceae;Thiobacillus;Thiobacillus denitrificans;Thiobacillus denitrificans RG	NA	NA	Ga0394449_01864	k141_1887	Noviherbaspirillum sp. BP10	2831285802	MEGAHIT-QMFCE002AF.10.fa
Ga0394449_01864_69887_70720	271.365	-9.68971	2.16695	-4.47159	7.76392e-06	2.09403e-05	DE	NA	NA	NA	NA	NA	NA	NA	NA	NA	NA	phytoene synthase	KO:K02291	Bacteria;Proteobacteria;Betaproteobacteria;Burkholderiales;Oxalobacteraceae;Noviherbaspirillum;Noviherbaspirillum sp. Root189;Noviherbaspirillum sp. Root189	EC:2.5.1.32	KO:K02291	Ga0394449_01864	k141_1887	Noviherbaspirillum sp. BP10	2831285802	MEGAHIT-QMFCE002AF.10.fa
Ga0394449_01864_70757_71599	104.649	-8.26122	2.21162	-3.73538	0.000187433	0.000422829	DE	NA	NA	NA	NA	NA	NA	NA	NA	NA	NA	squalene synthase HpnC	TIGR03464	Bacteria;Proteobacteria;Betaproteobacteria;Burkholderiales;Oxalobacteraceae;Herminiimonas;Herminiimonas arsenicoxydans;Herminiimonas arsenicoxydans ULPAs1	NA	NA	Ga0394449_01864	k141_1887	Noviherbaspirillum sp. BP10	2831285802	MEGAHIT-QMFCE002AF.10.fa
Ga0394449_01864_71887_72939	674.003	-9.63402	1.35896	-7.08928	1.34812e-12	8.46982e-12	DE	NA	NA	NA	NA	NA	NA	NA	NA	NA	NA	RND family efflux transporter MFP subunit	TIGR01730	Bacteria;Proteobacteria;Betaproteobacteria;Burkholderiales;Oxalobacteraceae;Noviherbaspirillum;Noviherbaspirillum autotrophicum;Noviherbaspirillum autotrophicum TSA66	NA	NA	Ga0394449_01864	k141_1887	Noviherbaspirillum sp. BP10	2831285802	MEGAHIT-QMFCE002AF.10.fa
Ga0394449_01864_7241_7615	174.705	-12.9006	3.0732	-4.19776	2.6957e-05	6.86404e-05	DE	NA	NA	NA	NA	NA	NA	NA	NA	NA	NA	hypothetical protein	Hypo-rule applied	Bacteria;Proteobacteria;Betaproteobacteria;Nitrosomonadales;Thiobacillaceae;Thiobacillus;Thiobacillus denitrificans;Thiobacillus denitrificans RG	NA	NA	Ga0394449_01864	k141_1887	Noviherbaspirillum sp. BP10	2831285802	MEGAHIT-QMFCE002AF.10.fa
Ga0394449_01864_72936_76040	2598	-13.1753	1.968	-6.69476	2.16023e-11	1.13236e-10	DE	NA	NA	NA	NA	NA	NA	NA	NA	NA	NA	multidrug efflux pump subunit AcrB	COG0841	Bacteria;Proteobacteria;Betaproteobacteria;Burkholderiales;Oxalobacteraceae;Noviherbaspirillum;Noviherbaspirillum autotrophicum;Noviherbaspirillum autotrophicum TSA66	NA	NA	Ga0394449_01864	k141_1887	Noviherbaspirillum sp. BP10	2831285802	MEGAHIT-QMFCE002AF.10.fa
Ga0394449_01864_76231_76317	143.731	-9.05123	2.00014	-4.52531	6.03083e-06	1.64712e-05	DE	NA	NA	NA	NA	NA	NA	NA	NA	NA	NA	tRNA_Leu_TAG	tRNA	NA	NA	NA	Ga0394449_01864	k141_1887	Noviherbaspirillum sp. BP10	2831285802	MEGAHIT-QMFCE002AF.10.fa
Ga0394449_01864_76347_77696	2534.37	-8.63191	1.59385	-5.41575	6.10313e-08	2.09623e-07	DE	NA	26.0254	NA	NA	NA	NA	NA	26.0254	0	3	trigger factor	KO:K03545	Bacteria;Proteobacteria;Betaproteobacteria;Burkholderiales;Oxalobacteraceae;Noviherbaspirillum;Noviherbaspirillum sp. Root189;Noviherbaspirillum sp. Root189	NA	KO:K03545	Ga0394449_01864	k141_1887	Noviherbaspirillum sp. BP10	2831285802	MEGAHIT-QMFCE002AF.10.fa
Ga0394449_01864_77737_78363	974.983	-8.85449	2.27376	-3.89422	9.85171e-05	0.000232242	DE	NA	NA	NA	NA	NA	NA	NA	NA	0	0	ATP-dependent Clp protease protease subunit	KO:K01358	Bacteria;Proteobacteria;Betaproteobacteria;Burkholderiales;Oxalobacteraceae;Noviherbaspirillum;Noviherbaspirillum autotrophicum;Noviherbaspirillum autotrophicum TSA66	EC:3.4.21.92	KO:K01358	Ga0394449_01864	k141_1887	Noviherbaspirillum sp. BP10	2831285802	MEGAHIT-QMFCE002AF.10.fa
Ga0394449_01864_78369_78509	129.865	-10.7337	1.76266	-6.08949	1.13269e-09	4.71055e-09	DE	NA	NA	NA	NA	NA	NA	NA	NA	NA	NA	hypothetical protein	Hypo-rule applied	NA	NA	NA	Ga0394449_01864	k141_1887	Noviherbaspirillum sp. BP10	2831285802	MEGAHIT-QMFCE002AF.10.fa
Ga0394449_01864_78524_79792	5797.09	-8.68601	1.63622	-5.30859	1.10474e-07	3.69168e-07	DE	NA	NA	NA	NA	NA	NA	NA	NA	NA	NA	ATP-dependent Clp protease ATP-binding subunit ClpX	KO:K03544	Bacteria;Proteobacteria;Betaproteobacteria;Burkholderiales;Oxalobacteraceae;Noviherbaspirillum;Noviherbaspirillum sp. Root189;Noviherbaspirillum sp. Root189	NA	KO:K03544	Ga0394449_01864	k141_1887	Noviherbaspirillum sp. BP10	2831285802	MEGAHIT-QMFCE002AF.10.fa
Ga0394449_01864_7863_9020	48.9909	-11.1887	2.34917	-4.76282	1.90903e-06	5.51661e-06	DE	NA	NA	NA	NA	NA	NA	NA	NA	NA	NA	hypothetical protein	Hypo-rule applied	Bacteria;Proteobacteria;Betaproteobacteria;Burkholderiales;Oxalobacteraceae;Noviherbaspirillum;Noviherbaspirillum sp. Root189;Noviherbaspirillum sp. Root189	NA	NA	Ga0394449_01864	k141_1887	Noviherbaspirillum sp. BP10	2831285802	MEGAHIT-QMFCE002AF.10.fa
Ga0394449_01864_80073_82493	2492.3	-7.39493	1.62656	-4.54634	5.45855e-06	1.49932e-05	DE	NA	24.7931	NA	NA	NA	NA	NA	24.7931	0	3	ATP-dependent Lon protease	KO:K01338	Bacteria;Proteobacteria;Betaproteobacteria;Burkholderiales;Oxalobacteraceae;Noviherbaspirillum;Noviherbaspirillum denitrificans;Noviherbaspirillum denitrificans TSA40	EC:3.4.21.53	KO:K01338	Ga0394449_01864	k141_1887	Noviherbaspirillum sp. BP10	2831285802	MEGAHIT-QMFCE002AF.10.fa
Ga0394449_01864_83126_83201	323.437	-6.12924	1.55161	-3.95026	7.80679e-05	0.000186868	DE	NA	NA	NA	NA	NA	NA	NA	NA	NA	NA	tRNA_Val_TAC	tRNA	NA	NA	NA	Ga0394449_01864	k141_1887	Noviherbaspirillum sp. BP10	2831285802	MEGAHIT-QMFCE002AF.10.fa
Ga0394449_01864_83236_83312	28.6825	-6.33936	2.17098	-2.92004	0.00349985	0.0064495	DE	NA	NA	NA	NA	NA	NA	NA	NA	NA	NA	tRNA_Asp_GTC	tRNA	NA	NA	NA	Ga0394449_01864	k141_1887	Noviherbaspirillum sp. BP10	2831285802	MEGAHIT-QMFCE002AF.10.fa
Ga0394449_01864_83459_85390	1639.54	-7.37621	1.60265	-4.6025	4.17448e-06	1.16006e-05	DE	NA	NA	NA	NA	NA	NA	NA	NA	NA	NA	peptidyl-prolyl cis-trans isomerase D	KO:K03770	Bacteria;Proteobacteria;Betaproteobacteria;Burkholderiales;Oxalobacteraceae;Noviherbaspirillum;Noviherbaspirillum sp. Root189;Noviherbaspirillum sp. Root189	EC:5.2.1.8	KO:K03770	Ga0394449_01864	k141_1887	Noviherbaspirillum sp. BP10	2831285802	MEGAHIT-QMFCE002AF.10.fa
Ga0394449_01864_85564_86247	174.906	-9.6446	1.85707	-5.19344	2.06441e-07	6.68327e-07	DE	NA	NA	NA	NA	NA	NA	NA	NA	NA	NA	acyl-CoA thioesterase-1	KO:K10804	Bacteria;Proteobacteria;Betaproteobacteria;Burkholderiales;Oxalobacteraceae;Noviherbaspirillum;Noviherbaspirillum denitrificans;Noviherbaspirillum denitrificans TSA40	EC:3.1.1.5,EC:3.1.2.-	KO:K10804	Ga0394449_01864	k141_1887	Noviherbaspirillum sp. BP10	2831285802	MEGAHIT-QMFCE002AF.10.fa
Ga0394449_01864_86216_86899	113.65	-12.4755	2.09991	-5.94096	2.8336e-09	1.12755e-08	DE	NA	NA	NA	NA	NA	NA	NA	NA	NA	NA	putative ABC transport system ATP-binding protein	KO:K02003	Bacteria;Proteobacteria;Betaproteobacteria;Burkholderiales;Oxalobacteraceae;Noviherbaspirillum;Noviherbaspirillum denitrificans;Noviherbaspirillum denitrificans TSA40	NA	KO:K02003	Ga0394449_01864	k141_1887	Noviherbaspirillum sp. BP10	2831285802	MEGAHIT-QMFCE002AF.10.fa
Ga0394449_01864_86924_87835	244.168	-13.4928	2.4139	-5.58963	2.27549e-08	8.22018e-08	DE	NA	NA	NA	NA	NA	NA	NA	NA	NA	NA	drug/metabolite transporter (DMT)-like permease	COG0697	Bacteria;Proteobacteria;Betaproteobacteria;Burkholderiales;Oxalobacteraceae;Noviherbaspirillum;Noviherbaspirillum sp. Root189;Noviherbaspirillum sp. Root189	NA	NA	Ga0394449_01864	k141_1887	Noviherbaspirillum sp. BP10	2831285802	MEGAHIT-QMFCE002AF.10.fa
Ga0394449_01864_87810_89339	126.861	-12.5521	2.40498	-5.21919	1.79707e-07	5.85713e-07	DE	NA	NA	NA	NA	NA	NA	NA	NA	NA	NA	hydroxyethylthiazole kinase-like uncharacterized protein yjeF	TIGR00196/TIGR00197	Bacteria;Proteobacteria;Betaproteobacteria;Burkholderiales;Oxalobacteraceae;Noviherbaspirillum;Noviherbaspirillum denitrificans;Noviherbaspirillum denitrificans TSA40	NA	NA	Ga0394449_01864	k141_1887	Noviherbaspirillum sp. BP10	2831285802	MEGAHIT-QMFCE002AF.10.fa
Ga0394449_01864_89558_91834	777.989	-6.88041	1.75098	-3.92947	8.51348e-05	0.000202808	DE	NA	25.0981	NA	NA	NA	NA	NA	25.0981	0	3	nitric oxide reductase subunit B	KO:K04561	Bacteria;Proteobacteria;Betaproteobacteria;Burkholderiales;Comamonadaceae;Polaromonas;Polaromonas sp. EUR3 1.2.1;Polaromonas sp. EUR3 1.2.1	EC:1.7.2.5	KO:K04561	Ga0394449_01864	k141_1887	Noviherbaspirillum sp. BP10	2831285802	MEGAHIT-QMFCE002AF.10.fa
Ga0394449_01864_91926_92168	57.4331	-3.99368	2.73973	-1.45769	NA	NA	not_DE	NA	26.5839	NA	NA	NA	NA	NA	26.5839	0	3	uncharacterized protein (DUF2249 family)	COG4309	Bacteria;Proteobacteria;Betaproteobacteria;Burkholderiales;Comamonadaceae;Polaromonas;Polaromonas naphthalenivorans;Polaromonas naphthalenivorans CJ2	NA	NA	Ga0394449_01864	k141_1887	Noviherbaspirillum sp. BP10	2831285802	MEGAHIT-QMFCE002AF.10.fa
Ga0394449_01864_92223_93338	184.994	-9.41433	2.20803	-4.26367	2.01097e-05	5.19222e-05	DE	NA	NA	NA	NA	NA	NA	NA	NA	NA	NA	L-2-hydroxyglutarate oxidase LhgO	COG0579	Bacteria;Proteobacteria;Betaproteobacteria;Burkholderiales;Oxalobacteraceae;Noviherbaspirillum;Noviherbaspirillum massiliense;Noviherbaspirillum massiliense JC206	NA	NA	Ga0394449_01864	k141_1887	Noviherbaspirillum sp. BP10	2831285802	MEGAHIT-QMFCE002AF.10.fa
Ga0394449_01864_922_3039	115.462	-9.07545	1.83166	-4.95476	7.2418e-07	2.20028e-06	DE	NA	26.3872	NA	NA	NA	NA	NA	26.3872	0	3	catecholate siderophore receptor	KO:K16090	Bacteria;Proteobacteria;Betaproteobacteria;Burkholderiales;Oxalobacteraceae;Noviherbaspirillum;Noviherbaspirillum denitrificans;Noviherbaspirillum denitrificans TSA40	NA	KO:K16090	Ga0394449_01864	k141_1887	Noviherbaspirillum sp. BP10	2831285802	MEGAHIT-QMFCE002AF.10.fa
Ga0394449_01864_9240_12407	95.7129	-12.2797	1.96978	-6.23405	4.54518e-10	1.97491e-09	DE	NA	NA	NA	NA	NA	NA	NA	NA	NA	NA	error-prone DNA polymerase	KO:K14162	Bacteria;Proteobacteria;Betaproteobacteria;Burkholderiales;Oxalobacteraceae;Noviherbaspirillum;Noviherbaspirillum autotrophicum;Noviherbaspirillum autotrophicum TSA66	EC:2.7.7.7	KO:K14162	Ga0394449_01864	k141_1887	Noviherbaspirillum sp. BP10	2831285802	MEGAHIT-QMFCE002AF.10.fa
Ga0394449_01864_93331_94584	50.4607	-7.05699	2.19759	-3.21124	0.00132164	0.0025787	DE	NA	NA	NA	NA	NA	NA	NA	NA	NA	NA	D-amino-acid dehydrogenase	KO:K00285	Bacteria;Proteobacteria;Betaproteobacteria;Burkholderiales;Oxalobacteraceae;Noviherbaspirillum;Noviherbaspirillum denitrificans;Noviherbaspirillum denitrificans TSA40	EC:1.4.99.-	KO:K00285	Ga0394449_01864	k141_1887	Noviherbaspirillum sp. BP10	2831285802	MEGAHIT-QMFCE002AF.10.fa
Ga0394449_01864_94802_95527	133.336	-7.13206	2.38621	-2.98887	0.00280014	0.00522585	DE	NA	NA	NA	NA	NA	NA	NA	NA	NA	NA	hypothetical protein	COG4318	Bacteria;Proteobacteria;Betaproteobacteria;Burkholderiales;Oxalobacteraceae;Noviherbaspirillum;Noviherbaspirillum denitrificans;Noviherbaspirillum denitrificans TSA40	NA	NA	Ga0394449_01864	k141_1887	Noviherbaspirillum sp. BP10	2831285802	MEGAHIT-QMFCE002AF.10.fa
Ga0394449_01864_95606_96940	168.84	-8.67637	2.10281	-4.12608	3.68996e-05	9.2537e-05	DE	NA	NA	NA	NA	NA	NA	NA	NA	NA	NA	Asp-tRNA(Asn)/Glu-tRNA(Gln) amidotransferase A subunit family amidase	COG0154	Bacteria;Proteobacteria;Betaproteobacteria;Burkholderiales;Oxalobacteraceae;Noviherbaspirillum;Noviherbaspirillum sp. Root189;Noviherbaspirillum sp. Root189	NA	NA	Ga0394449_01864	k141_1887	Noviherbaspirillum sp. BP10	2831285802	MEGAHIT-QMFCE002AF.10.fa
Ga0394449_01864_97155_101174	1120.22	-7.64053	1.66013	-4.60238	4.17698e-06	1.16054e-05	DE	NA	NA	NA	NA	NA	NA	NA	NA	NA	NA	phosphoribosylformylglycinamidine synthase	KO:K01952	Bacteria;Proteobacteria;Betaproteobacteria;Burkholderiales;Oxalobacteraceae;Noviherbaspirillum;Noviherbaspirillum autotrophicum;Noviherbaspirillum autotrophicum TSA66	EC:6.3.5.3	KO:K01952	Ga0394449_01864	k141_1887	Noviherbaspirillum sp. BP10	2831285802	MEGAHIT-QMFCE002AF.10.fa
Ga0394449_02043_143_769	60.8446	-8.65951	1.8716	-4.6268	3.71363e-06	1.03798e-05	DE	NA	NA	NA	NA	NA	NA	NA	NA	NA	NA	CRP-like cAMP-binding protein	COG0664	Bacteria;Proteobacteria;Gammaproteobacteria;Pseudomonadales;Pseudomonadaceae;Pseudomonas;Pseudomonas benzenivorans;Pseudomonas benzenivorans DSM 8628	NA	NA	Ga0394449_02043	k141_2068	Noviherbaspirillum sp. BP10	2831285802	MEGAHIT-QMFCE002AF.10.fa
Ga0394449_02043_2603_4414	191.734	-11.2041	1.98746	-5.63739	1.72646e-08	6.32868e-08	DE	NA	NA	NA	NA	NA	NA	NA	NA	NA	NA	H+/Cl- antiporter ClcA	COG0038	Bacteria;Proteobacteria;Betaproteobacteria;Burkholderiales;Burkholderiaceae;Caballeronia;Caballeronia mineralivorans;Caballeronia mineralivorans PML1(12)	NA	NA	Ga0394449_02043	k141_2068	Noviherbaspirillum sp. BP10	2831285802	MEGAHIT-QMFCE002AF.10.fa
Ga0394449_02043_846_2315	139.604	-12.75	2.17034	-5.87466	4.23718e-09	1.66128e-08	DE	NA	NA	NA	NA	NA	NA	NA	NA	NA	NA	carboxypeptidase PM20D1	KO:K13049	Bacteria;Proteobacteria;Gammaproteobacteria;Pseudomonadales;Pseudomonadaceae;Rugamonas;Rugamonas rubra;Rugamonas rubra ATCC 43154	EC:3.4.17.-	KO:K13049	Ga0394449_02043	k141_2068	Noviherbaspirillum sp. BP10	2831285802	MEGAHIT-QMFCE002AF.10.fa
Ga0394449_02672_10085_11242	111.27	-12.4564	2.08102	-5.98571	2.15445e-09	8.69349e-09	DE	NA	NA	NA	NA	NA	NA	NA	NA	NA	NA	uncharacterized protein (TIGR02271 family)	TIGR02271	Bacteria;Proteobacteria;Betaproteobacteria;Burkholderiales;Oxalobacteraceae;Noviherbaspirillum;Noviherbaspirillum autotrophicum;Noviherbaspirillum autotrophicum TSA66	NA	NA	Ga0394449_02672	k141_2708	Noviherbaspirillum sp. BP10	2831285802	MEGAHIT-QMFCE002AF.10.fa
Ga0394449_02672_11306_11785	191.353	-10.2478	1.83448	-5.58624	2.32039e-08	8.37832e-08	DE	NA	NA	NA	NA	NA	NA	NA	NA	NA	NA	hypothetical protein	Hypo-rule applied	Bacteria;Proteobacteria;Betaproteobacteria;Burkholderiales;Oxalobacteraceae;Noviherbaspirillum;Noviherbaspirillum sp. Root189;Noviherbaspirillum sp. Root189	NA	NA	Ga0394449_02672	k141_2708	Noviherbaspirillum sp. BP10	2831285802	MEGAHIT-QMFCE002AF.10.fa
Ga0394449_02672_11874_13073	206.942	-13.3331	2.12831	-6.26462	3.73739e-10	1.64063e-09	DE	NA	NA	NA	NA	NA	NA	NA	NA	NA	NA	EAL domain-containing protein (putative c-di-GMP-specific phosphodiesterase class I)/CheY-like chemotaxis protein	COG2200/COG0784	Bacteria;Proteobacteria;Betaproteobacteria;Burkholderiales;Oxalobacteraceae;Noviherbaspirillum;Noviherbaspirillum denitrificans;Noviherbaspirillum denitrificans TSA40	NA	NA	Ga0394449_02672	k141_2708	Noviherbaspirillum sp. BP10	2831285802	MEGAHIT-QMFCE002AF.10.fa
Ga0394449_02672_13273_13380	58.7269	-27.5104	3.91111	-7.03391	2.00829e-12	1.22316e-11	DE	NA	NA	NA	NA	NA	NA	NA	NA	NA	NA	hypothetical protein	Hypo-rule applied	NA	NA	NA	Ga0394449_02672	k141_2708	Noviherbaspirillum sp. BP10	2831285802	MEGAHIT-QMFCE002AF.10.fa
Ga0394449_02672_13428_13988	65.8293	-11.483	3.15448	-3.64023	0.000272396	0.000597263	DE	NA	NA	NA	NA	NA	NA	NA	NA	NA	NA	uncharacterized protein YkwD	COG2340	Bacteria;Proteobacteria;Betaproteobacteria;Burkholderiales;Oxalobacteraceae;Noviherbaspirillum;Noviherbaspirillum massiliense;Noviherbaspirillum massiliense JC206	NA	NA	Ga0394449_02672	k141_2708	Noviherbaspirillum sp. BP10	2831285802	MEGAHIT-QMFCE002AF.10.fa
Ga0394449_02672_14083_14550	25.1065	-6.92953	1.99058	-3.48116	0.000499254	0.00104468	DE	NA	NA	NA	NA	NA	NA	NA	NA	NA	NA	curved DNA-binding protein CbpA	COG2214	Bacteria;Proteobacteria;Betaproteobacteria;Burkholderiales;Oxalobacteraceae;Noviherbaspirillum;Noviherbaspirillum sp. Root189;Noviherbaspirillum sp. Root189	NA	NA	Ga0394449_02672	k141_2708	Noviherbaspirillum sp. BP10	2831285802	MEGAHIT-QMFCE002AF.10.fa
Ga0394449_02672_14571_16040	91.7362	-11.2602	2.00806	-5.60751	2.05257e-08	7.45091e-08	DE	NA	NA	NA	NA	NA	NA	NA	NA	NA	NA	DNA-binding transcriptional MocR family regulator	COG1167	Bacteria;Proteobacteria;Betaproteobacteria;Burkholderiales;Oxalobacteraceae;Noviherbaspirillum;Noviherbaspirillum autotrophicum;Noviherbaspirillum autotrophicum TSA66	NA	NA	Ga0394449_02672	k141_2708	Noviherbaspirillum sp. BP10	2831285802	MEGAHIT-QMFCE002AF.10.fa
Ga0394449_02672_1509_3533	27.7538	-10.4599	2.07606	-5.03833	4.69623e-07	1.45535e-06	DE	NA	NA	NA	NA	NA	NA	NA	NA	NA	NA	primosomal protein N' (replication factor Y)	KO:K04066	Bacteria;Proteobacteria;Betaproteobacteria;Burkholderiales;Oxalobacteraceae;Noviherbaspirillum;Noviherbaspirillum autotrophicum;Noviherbaspirillum autotrophicum TSA66	EC:3.6.4.-	KO:K04066	Ga0394449_02672	k141_2708	Noviherbaspirillum sp. BP10	2831285802	MEGAHIT-QMFCE002AF.10.fa
Ga0394449_02672_16217_16567	19.2888	-9.71576	3.13416	-3.09995	0.00193551	0.00368497	DE	NA	NA	NA	NA	NA	NA	NA	NA	NA	NA	hypothetical protein	Hypo-rule applied	Bacteria;Proteobacteria;Betaproteobacteria;Burkholderiales;Oxalobacteraceae;Noviherbaspirillum;Noviherbaspirillum autotrophicum;Noviherbaspirillum autotrophicum TSA66	NA	NA	Ga0394449_02672	k141_2708	Noviherbaspirillum sp. BP10	2831285802	MEGAHIT-QMFCE002AF.10.fa
Ga0394449_02672_16655_17641	93.666	-11.9821	3.24576	-3.69162	0.000222831	0.000496532	DE	NA	NA	NA	NA	NA	NA	NA	NA	NA	NA	virginiamycin B lyase	KO:K18235	Bacteria;Proteobacteria;Betaproteobacteria;Burkholderiales;Oxalobacteraceae;Noviherbaspirillum;Noviherbaspirillum sp. Root189;Noviherbaspirillum sp. Root189	EC:4.2.99.-	KO:K18235	Ga0394449_02672	k141_2708	Noviherbaspirillum sp. BP10	2831285802	MEGAHIT-QMFCE002AF.10.fa
Ga0394449_02672_17648_17938	61.2637	-11.3521	3.43618	-3.30369	0.000954208	0.00190052	DE	NA	NA	NA	NA	NA	NA	NA	NA	NA	NA	hypothetical protein	Hypo-rule applied	Bacteria;Proteobacteria;Betaproteobacteria;Burkholderiales;Oxalobacteraceae;Noviherbaspirillum;Noviherbaspirillum sp. Root189;Noviherbaspirillum sp. Root189	NA	NA	Ga0394449_02672	k141_2708	Noviherbaspirillum sp. BP10	2831285802	MEGAHIT-QMFCE002AF.10.fa
Ga0394449_02672_18021_19019	25.4304	-10.0908	3.34736	-3.01455	0.00257363	0.00482241	DE	NA	NA	NA	NA	NA	NA	NA	NA	NA	NA	AraC-like DNA-binding protein	COG2207	Bacteria;Proteobacteria;Betaproteobacteria;Burkholderiales;Oxalobacteraceae;Noviherbaspirillum;Noviherbaspirillum autotrophicum;Noviherbaspirillum autotrophicum TSA66	NA	NA	Ga0394449_02672	k141_2708	Noviherbaspirillum sp. BP10	2831285802	MEGAHIT-QMFCE002AF.10.fa
Ga0394449_02672_19166_20764	2.98611	-6.95663	3.93808	-1.7665	0.0773116	0.0968611	not_DE	NA	NA	NA	NA	NA	NA	NA	NA	NA	NA	alkyldihydroxyacetonephosphate synthase	KO:K00803	Bacteria;Proteobacteria;Betaproteobacteria;Burkholderiales;Oxalobacteraceae;Noviherbaspirillum;Noviherbaspirillum autotrophicum;Noviherbaspirillum autotrophicum TSA66	EC:2.5.1.26	KO:K00803	Ga0394449_02672	k141_2708	Noviherbaspirillum sp. BP10	2831285802	MEGAHIT-QMFCE002AF.10.fa
Ga0394449_02672_20776_22383	15.4766	-9.37448	3.33212	-2.81337	0.00490257	0.0088456	DE	NA	NA	NA	NA	NA	NA	NA	NA	NA	NA	glycerol-3-phosphate dehydrogenase	KO:K00111	Bacteria;Proteobacteria;Betaproteobacteria;Burkholderiales;Oxalobacteraceae;Noviherbaspirillum;Noviherbaspirillum autotrophicum;Noviherbaspirillum autotrophicum TSA66	EC:1.1.5.3	KO:K00111	Ga0394449_02672	k141_2708	Noviherbaspirillum sp. BP10	2831285802	MEGAHIT-QMFCE002AF.10.fa
Ga0394449_02672_22405_23967	169.513	-13.0309	2.17003	-6.00495	1.91393e-09	7.77336e-09	DE	NA	NA	NA	NA	NA	NA	NA	NA	NA	NA	sugar (pentulose or hexulose) kinase	COG1070	Bacteria;Proteobacteria;Betaproteobacteria;Burkholderiales;Oxalobacteraceae;Noviherbaspirillum;Noviherbaspirillum autotrophicum;Noviherbaspirillum autotrophicum TSA66	NA	NA	Ga0394449_02672	k141_2708	Noviherbaspirillum sp. BP10	2831285802	MEGAHIT-QMFCE002AF.10.fa
Ga0394449_02672_23974_25098	106.292	-12.2277	2.74573	-4.45336	NA	NA	not_DE	NA	NA	NA	NA	NA	NA	NA	NA	NA	NA	ABC-2 type transport system permease protein	KO:K01992	Bacteria;Proteobacteria;Betaproteobacteria;Burkholderiales;Oxalobacteraceae;Noviherbaspirillum;Noviherbaspirillum denitrificans;Noviherbaspirillum denitrificans TSA40	NA	KO:K01992	Ga0394449_02672	k141_2708	Noviherbaspirillum sp. BP10	2831285802	MEGAHIT-QMFCE002AF.10.fa
Ga0394449_02672_25095_26018	38.5102	-10.6958	3.28835	-3.25264	0.00114337	0.00225235	DE	NA	NA	NA	NA	NA	NA	NA	NA	NA	NA	ABC-2 type transport system ATP-binding protein	KO:K01990	Bacteria;Proteobacteria;Betaproteobacteria;Burkholderiales;Oxalobacteraceae;Noviherbaspirillum;Noviherbaspirillum autotrophicum;Noviherbaspirillum autotrophicum TSA66	NA	KO:K01990	Ga0394449_02672	k141_2708	Noviherbaspirillum sp. BP10	2831285802	MEGAHIT-QMFCE002AF.10.fa
Ga0394449_02672_26018_26974	11.3258	-8.95146	3.12831	-2.86143	0.00421731	0.00767503	DE	NA	NA	NA	NA	NA	NA	NA	NA	NA	NA	HlyD family secretion protein	KO:K01993	Bacteria;Proteobacteria;Betaproteobacteria;Burkholderiales;Oxalobacteraceae;Noviherbaspirillum;Noviherbaspirillum denitrificans;Noviherbaspirillum denitrificans TSA40	NA	KO:K01993	Ga0394449_02672	k141_2708	Noviherbaspirillum sp. BP10	2831285802	MEGAHIT-QMFCE002AF.10.fa
Ga0394449_02672_26971_27612	5.97223	-7.96101	3.8965	-2.04312	0.0410406	0.0560085	not_DE	NA	NA	NA	NA	NA	NA	NA	NA	NA	NA	AcrR family transcriptional regulator	COG1309	Bacteria;Proteobacteria;Betaproteobacteria;Burkholderiales;Oxalobacteraceae;Noviherbaspirillum;Noviherbaspirillum autotrophicum;Noviherbaspirillum autotrophicum TSA66	NA	NA	Ga0394449_02672	k141_2708	Noviherbaspirillum sp. BP10	2831285802	MEGAHIT-QMFCE002AF.10.fa
Ga0394449_02672_2_727	87.0268	-12.1165	2.02516	-5.98301	2.19058e-09	8.83448e-09	DE	NA	NA	NA	NA	NA	NA	NA	NA	NA	NA	uroporphyrinogen decarboxylase	KO:K01599	Bacteria;Proteobacteria;Betaproteobacteria;Burkholderiales;Oxalobacteraceae;Noviherbaspirillum;Noviherbaspirillum denitrificans;Noviherbaspirillum denitrificans TSA40	EC:4.1.1.37	KO:K01599	Ga0394449_02672	k141_2708	Noviherbaspirillum sp. BP10	2831285802	MEGAHIT-QMFCE002AF.10.fa
Ga0394449_02672_27862_29544	281.509	-13.7966	2.06905	-6.66807	2.5918e-11	1.33561e-10	DE	NA	NA	NA	NA	NA	NA	NA	NA	NA	NA	long-chain acyl-CoA synthetase	KO:K01897	Bacteria;Proteobacteria;Betaproteobacteria;Burkholderiales;Oxalobacteraceae;Noviherbaspirillum;Noviherbaspirillum sp. Root189;Noviherbaspirillum sp. Root189	EC:6.2.1.3	KO:K01897	Ga0394449_02672	k141_2708	Noviherbaspirillum sp. BP10	2831285802	MEGAHIT-QMFCE002AF.10.fa
Ga0394449_02672_29731_30774	31.9193	-10.4421	3.12935	-3.33683	0.000847408	0.00170303	DE	NA	NA	NA	NA	NA	NA	NA	NA	NA	NA	AraC-like DNA-binding protein	COG2207	Bacteria;Proteobacteria;Betaproteobacteria;Burkholderiales;Oxalobacteraceae;Noviherbaspirillum;Noviherbaspirillum denitrificans;Noviherbaspirillum denitrificans TSA40	NA	NA	Ga0394449_02672	k141_2708	Noviherbaspirillum sp. BP10	2831285802	MEGAHIT-QMFCE002AF.10.fa
Ga0394449_02672_31138_31725	401.09	-7.07407	1.30771	-5.40949	6.32038e-08	2.16488e-07	DE	NA	NA	NA	NA	NA	NA	NA	NA	NA	NA	hypothetical protein	Hypo-rule applied	Bacteria;Proteobacteria;Gammaproteobacteria;Methylococcales;Methylococcaceae;Methylobacter;Methylobacter tundripaludum;Methylobacter tundripaludum OWC-DMM	NA	NA	Ga0394449_02672	k141_2708	Noviherbaspirillum sp. BP10	2831285802	MEGAHIT-QMFCE002AF.10.fa
Ga0394449_02672_31917_32438	660.797	-9.16655	2.27415	-4.03076	NA	NA	not_DE	NA	NA	NA	NA	NA	NA	NA	NA	NA	NA	hypothetical protein	Hypo-rule applied	NA	NA	NA	Ga0394449_02672	k141_2708	Noviherbaspirillum sp. BP10	2831285802	MEGAHIT-QMFCE002AF.10.fa
Ga0394449_02672_32529_33113	387.64	-9.493	2.01205	-4.71808	NA	NA	not_DE	NA	NA	NA	NA	NA	NA	NA	NA	NA	NA	threonine/homoserine/homoserine lactone efflux protein	COG1280	Bacteria;Proteobacteria;Betaproteobacteria;Neisseriales;Chromobacteriaceae;Pseudogulbenkiania;Pseudogulbenkiania sp. MAI-1;Pseudogulbenkiania sp. MAI-1	NA	NA	Ga0394449_02672	k141_2708	Noviherbaspirillum sp. BP10	2831285802	MEGAHIT-QMFCE002AF.10.fa
Ga0394449_02672_33399_35423	386.084	-7.8729	1.62231	-4.8529	1.21667e-06	3.59654e-06	DE	NA	NA	NA	NA	NA	NA	NA	NA	NA	NA	ATP-dependent DNA helicase Rep	KO:K03656	Bacteria;Proteobacteria;Betaproteobacteria;Burkholderiales;Oxalobacteraceae;Noviherbaspirillum;Noviherbaspirillum sp. Root189;Noviherbaspirillum sp. Root189	EC:3.6.4.12	KO:K03656	Ga0394449_02672	k141_2708	Noviherbaspirillum sp. BP10	2831285802	MEGAHIT-QMFCE002AF.10.fa
Ga0394449_02672_3556_5247	75.8418	-11.6712	3.30674	-3.52953	0.000416293	0.000883462	DE	NA	NA	NA	NA	NA	NA	NA	NA	NA	NA	TolA protein	TIGR02794	Bacteria;Proteobacteria;Betaproteobacteria;Burkholderiales;Oxalobacteraceae;Noviherbaspirillum;Noviherbaspirillum autotrophicum;Noviherbaspirillum autotrophicum TSA66	NA	NA	Ga0394449_02672	k141_2708	Noviherbaspirillum sp. BP10	2831285802	MEGAHIT-QMFCE002AF.10.fa
Ga0394449_02672_35829_36647	75.664	-8.42198	1.98556	-4.24161	2.21926e-05	5.70633e-05	DE	NA	NA	NA	NA	NA	NA	NA	NA	NA	NA	hypothetical protein	Hypo-rule applied	Bacteria;Proteobacteria;Betaproteobacteria;Burkholderiales;Oxalobacteraceae;Noviherbaspirillum;Noviherbaspirillum autotrophicum;Noviherbaspirillum autotrophicum TSA66	NA	NA	Ga0394449_02672	k141_2708	Noviherbaspirillum sp. BP10	2831285802	MEGAHIT-QMFCE002AF.10.fa
Ga0394449_02672_36671_37468	12.0412	-9.01493	3.2528	-2.77144	0.00558097	0.00996606	DE	NA	NA	NA	NA	NA	NA	NA	NA	NA	NA	NAD(P)-dependent dehydrogenase (short-subunit alcohol dehydrogenase family)	COG1028	Bacteria;Proteobacteria;Betaproteobacteria;Burkholderiales;Comamonadaceae;Variovorax;unclassified Variovorax;Variovorax sp. 160MFSha2.1	NA	NA	Ga0394449_02672	k141_2708	Noviherbaspirillum sp. BP10	2831285802	MEGAHIT-QMFCE002AF.10.fa
Ga0394449_02672_37595_38128	54.6556	-11.2032	3.21066	-3.48936	0.000484177	0.00101597	DE	NA	NA	NA	NA	NA	NA	NA	NA	NA	NA	8-oxo-dGTP pyrophosphatase MutT (NUDIX family)	COG0494	Bacteria;Proteobacteria;Betaproteobacteria;Burkholderiales;Oxalobacteraceae;Noviherbaspirillum;Noviherbaspirillum sp. Root189;Noviherbaspirillum sp. Root189	NA	NA	Ga0394449_02672	k141_2708	Noviherbaspirillum sp. BP10	2831285802	MEGAHIT-QMFCE002AF.10.fa
Ga0394449_02672_38213_39280	35.3841	-10.5653	3.37396	-3.13142	0.00173965	0.00332991	DE	NA	NA	NA	NA	NA	NA	NA	NA	NA	NA	glyoxylase-like metal-dependent hydrolase (beta-lactamase superfamily II)	COG0491	Bacteria;Proteobacteria;Betaproteobacteria;Burkholderiales;Oxalobacteraceae;Noviherbaspirillum;Noviherbaspirillum sp. Root189;Noviherbaspirillum sp. Root189	NA	NA	Ga0394449_02672	k141_2708	Noviherbaspirillum sp. BP10	2831285802	MEGAHIT-QMFCE002AF.10.fa
Ga0394449_02672_39264_40178	173.571	-29.0013	3.4936	-8.30127	NA	NA	not_DE	NA	NA	NA	NA	NA	NA	NA	NA	NA	NA	hypothetical protein	Hypo-rule applied	Bacteria;Proteobacteria;Betaproteobacteria;Burkholderiales;Burkholderiaceae;Paucimonas;Paucimonas lemoignei;Paucimonas lemoignei DSM 7445	NA	NA	Ga0394449_02672	k141_2708	Noviherbaspirillum sp. BP10	2831285802	MEGAHIT-QMFCE002AF.10.fa
Ga0394449_02672_40374_41066	91.4486	-10.1766	2.81517	-3.61492	0.000300443	0.000653769	DE	NA	NA	NA	NA	NA	NA	NA	NA	NA	NA	HD-GYP domain-containing protein (c-di-GMP phosphodiesterase class II)	COG2206	Bacteria;Proteobacteria;Betaproteobacteria;Burkholderiales;Oxalobacteraceae;Noviherbaspirillum;Noviherbaspirillum autotrophicum;Noviherbaspirillum autotrophicum TSA66	NA	NA	Ga0394449_02672	k141_2708	Noviherbaspirillum sp. BP10	2831285802	MEGAHIT-QMFCE002AF.10.fa
Ga0394449_02672_41433_43058	232.857	-13.423	2.41724	-5.55302	2.80772e-08	1.00673e-07	DE	NA	NA	NA	NA	NA	NA	NA	NA	NA	NA	fatty-acyl-CoA synthase	KO:K00666	Bacteria;Proteobacteria;Betaproteobacteria;Burkholderiales;Oxalobacteraceae;Noviherbaspirillum;Noviherbaspirillum denitrificans;Noviherbaspirillum denitrificans TSA40	EC:6.2.1.-	KO:K00666	Ga0394449_02672	k141_2708	Noviherbaspirillum sp. BP10	2831285802	MEGAHIT-QMFCE002AF.10.fa
Ga0394449_02672_43093_44811	103.427	-12.2437	2.45288	-4.99156	5.98945e-07	1.83933e-06	DE	NA	NA	NA	NA	NA	NA	NA	NA	NA	NA	para-nitrobenzyl esterase	KO:K03929	Bacteria;Proteobacteria;Betaproteobacteria;Burkholderiales;Oxalobacteraceae;Noviherbaspirillum;Noviherbaspirillum autotrophicum;Noviherbaspirillum autotrophicum TSA66	EC:3.1.1.-	KO:K03929	Ga0394449_02672	k141_2708	Noviherbaspirillum sp. BP10	2831285802	MEGAHIT-QMFCE002AF.10.fa
Ga0394449_02672_44885_46123	74.7743	-8.73148	1.82601	-4.78171	1.73808e-06	5.04401e-06	DE	NA	NA	NA	NA	NA	NA	NA	NA	NA	NA	branched-chain amino acid transport system substrate-binding protein	KO:K01999	Bacteria;Proteobacteria;Betaproteobacteria;Burkholderiales;Burkholderiaceae;Paucimonas;Paucimonas lemoignei;Paucimonas lemoignei DSM 7445	NA	KO:K01999	Ga0394449_02672	k141_2708	Noviherbaspirillum sp. BP10	2831285802	MEGAHIT-QMFCE002AF.10.fa
Ga0394449_02672_46161_47300	17.2548	-9.66762	2.39539	-4.03593	5.43857e-05	0.00013306	DE	NA	NA	NA	NA	NA	NA	NA	NA	NA	NA	ABC-type branched-subunit amino acid transport system substrate-binding protein	COG0683	Bacteria;Proteobacteria;Betaproteobacteria;Burkholderiales;Oxalobacteraceae;Noviherbaspirillum;Noviherbaspirillum autotrophicum;Noviherbaspirillum autotrophicum TSA66	NA	NA	Ga0394449_02672	k141_2708	Noviherbaspirillum sp. BP10	2831285802	MEGAHIT-QMFCE002AF.10.fa
Ga0394449_02672_47568_48554	28.0726	-10.2771	2.98373	-3.44439	0.000572351	0.00118682	DE	NA	NA	NA	NA	NA	NA	NA	NA	NA	NA	AraC-like DNA-binding protein	COG2207	Bacteria;Proteobacteria;Betaproteobacteria;Burkholderiales;Oxalobacteraceae;Noviherbaspirillum;Noviherbaspirillum autotrophicum;Noviherbaspirillum autotrophicum TSA66	NA	NA	Ga0394449_02672	k141_2708	Noviherbaspirillum sp. BP10	2831285802	MEGAHIT-QMFCE002AF.10.fa
Ga0394449_02672_48668_50083	83.594	-11.957	2.37894	-5.02619	5.00315e-07	1.54694e-06	DE	NA	NA	NA	NA	NA	NA	NA	NA	NA	NA	malonyl-CoA decarboxylase	KO:K01578	Bacteria;Proteobacteria;Betaproteobacteria;unclassified Betaproteobacteria;unclassified Betaproteobacteria;unclassified Betaproteobacteria;uncultured beta proteobacterium;unclassified betaproteobacterium ENR4	EC:4.1.1.9	KO:K01578	Ga0394449_02672	k141_2708	Noviherbaspirillum sp. BP10	2831285802	MEGAHIT-QMFCE002AF.10.fa
Ga0394449_02672_50099_50368	87.2221	-10.9103	2.66283	-4.09724	4.18098e-05	0.00010384	DE	NA	NA	NA	NA	NA	NA	NA	NA	NA	NA	hypothetical protein	Hypo-rule applied	Bacteria;Proteobacteria;Betaproteobacteria;Burkholderiales;Oxalobacteraceae;Noviherbaspirillum;Noviherbaspirillum sp. Root189;Noviherbaspirillum sp. Root189	NA	NA	Ga0394449_02672	k141_2708	Noviherbaspirillum sp. BP10	2831285802	MEGAHIT-QMFCE002AF.10.fa
Ga0394449_02672_50420_51313	7.88089	-8.3938	3.20007	-2.62301	0.00871579	0.0149023	DE	NA	NA	NA	NA	NA	NA	NA	NA	NA	NA	hypothetical protein	Hypo-rule applied	Bacteria;Proteobacteria;Alphaproteobacteria;Rhizobiales;Bradyrhizobiaceae;Rhodopseudomonas;Rhodopseudomonas faecalis;Rhodopseudomonas faecalis JCM 11668	NA	NA	Ga0394449_02672	k141_2708	Noviherbaspirillum sp. BP10	2831285802	MEGAHIT-QMFCE002AF.10.fa
Ga0394449_02672_51403_52086	6.97671	-7.37512	3.58583	-2.05674	0.0397112	0.0552545	not_DE	NA	NA	NA	NA	NA	NA	NA	NA	NA	NA	NAD(P)-dependent dehydrogenase (short-subunit alcohol dehydrogenase family)	COG1028	Bacteria;Proteobacteria;Betaproteobacteria;Burkholderiales;Oxalobacteraceae;Noviherbaspirillum;Noviherbaspirillum sp. Root189;Noviherbaspirillum sp. Root189	NA	NA	Ga0394449_02672	k141_2708	Noviherbaspirillum sp. BP10	2831285802	MEGAHIT-QMFCE002AF.10.fa
Ga0394449_02672_52320_52613	21.613	-10.0399	2.23465	-4.49283	7.02822e-06	1.90454e-05	DE	NA	NA	NA	NA	NA	NA	NA	NA	NA	NA	hypothetical protein	COG5626	Bacteria;Proteobacteria;Betaproteobacteria;Burkholderiales;Oxalobacteraceae;Noviherbaspirillum;Noviherbaspirillum massiliense;Noviherbaspirillum massiliense JC206	NA	NA	Ga0394449_02672	k141_2708	Noviherbaspirillum sp. BP10	2831285802	MEGAHIT-QMFCE002AF.10.fa
Ga0394449_02672_52737_52955	22.2444	-5.78344	3.68738	-1.56844	0.116779	0.137299	not_DE	NA	NA	NA	NA	NA	NA	NA	NA	NA	NA	hypothetical protein	Hypo-rule applied	Bacteria;Proteobacteria;Betaproteobacteria;Burkholderiales;Oxalobacteraceae;Noviherbaspirillum;Noviherbaspirillum denitrificans;Noviherbaspirillum denitrificans TSA40	NA	NA	Ga0394449_02672	k141_2708	Noviherbaspirillum sp. BP10	2831285802	MEGAHIT-QMFCE002AF.10.fa
Ga0394449_02672_53171_53593	59.7223	-27.5362	3.91104	-7.04063	1.9137e-12	1.16984e-11	DE	NA	NA	NA	NA	NA	NA	NA	NA	NA	NA	flagellar basal body-associated protein FliL	COG1580	Bacteria;Proteobacteria;Betaproteobacteria;Burkholderiales;Oxalobacteraceae;Noviherbaspirillum;Noviherbaspirillum denitrificans;Noviherbaspirillum denitrificans TSA40	NA	NA	Ga0394449_02672	k141_2708	Noviherbaspirillum sp. BP10	2831285802	MEGAHIT-QMFCE002AF.10.fa
Ga0394449_02672_5350_7665	136.233	-12.7022	2.21982	-5.72219	1.05162e-08	3.96587e-08	DE	NA	NA	NA	NA	NA	NA	NA	NA	NA	NA	phosphatidylserine/phosphatidylglycerophosphate/cardiolipin synthase-like enzyme/uncharacterized membrane protein YdjX (TVP38/TMEM64 family)	COG1502/COG0398	Bacteria;Proteobacteria;Betaproteobacteria;Burkholderiales;Oxalobacteraceae;Noviherbaspirillum;Noviherbaspirillum sp. Root189;Noviherbaspirillum sp. Root189	NA	NA	Ga0394449_02672	k141_2708	Noviherbaspirillum sp. BP10	2831285802	MEGAHIT-QMFCE002AF.10.fa
Ga0394449_02672_53719_54621	63.1197	-11.5534	2.35151	-4.91318	8.96128e-07	2.69434e-06	DE	NA	NA	NA	NA	NA	NA	NA	NA	NA	NA	thioredoxin reductase (NADPH)	KO:K00384	Bacteria;Proteobacteria;Betaproteobacteria;Burkholderiales;Oxalobacteraceae;Noviherbaspirillum;Noviherbaspirillum autotrophicum;Noviherbaspirillum autotrophicum TSA66	EC:1.8.1.9	KO:K00384	Ga0394449_02672	k141_2708	Noviherbaspirillum sp. BP10	2831285802	MEGAHIT-QMFCE002AF.10.fa
Ga0394449_02672_54706_55137	71.7322	-9.71997	1.80425	-5.38728	7.1533e-08	2.43731e-07	DE	NA	NA	NA	NA	NA	NA	NA	NA	NA	NA	hypothetical protein	Hypo-rule applied	Bacteria;Proteobacteria;Betaproteobacteria;Burkholderiales;Oxalobacteraceae;Noviherbaspirillum;Noviherbaspirillum denitrificans;Noviherbaspirillum denitrificans TSA40	NA	NA	Ga0394449_02672	k141_2708	Noviherbaspirillum sp. BP10	2831285802	MEGAHIT-QMFCE002AF.10.fa
Ga0394449_02672_55441_55713	24.3166	-10.1779	2.45952	-4.13818	3.50078e-05	8.79553e-05	DE	NA	NA	NA	NA	NA	NA	NA	NA	NA	NA	hypothetical protein	Hypo-rule applied	NA	NA	NA	Ga0394449_02672	k141_2708	Noviherbaspirillum sp. BP10	2831285802	MEGAHIT-QMFCE002AF.10.fa
Ga0394449_02672_55724_55897	12.9467	-6.36134	2.64263	-2.40719	0.0160756	0.0256289	DE	NA	NA	NA	NA	NA	NA	NA	NA	NA	NA	F0F1-type ATP synthase membrane subunit b/b'	COG0711	Bacteria;Proteobacteria;Betaproteobacteria;Burkholderiales;Oxalobacteraceae;Noviherbaspirillum;Noviherbaspirillum denitrificans;Noviherbaspirillum denitrificans TSA40	NA	NA	Ga0394449_02672	k141_2708	Noviherbaspirillum sp. BP10	2831285802	MEGAHIT-QMFCE002AF.10.fa
Ga0394449_02672_56091_57188	50.1116	-11.0647	3.40896	-3.24577	0.00117133	0.00230469	DE	NA	NA	NA	NA	NA	NA	NA	NA	NA	NA	DNA polymerase-4	KO:K02346	Bacteria;Proteobacteria;Betaproteobacteria;Burkholderiales;Oxalobacteraceae;Noviherbaspirillum;Noviherbaspirillum sp. Root189;Noviherbaspirillum sp. Root189	EC:2.7.7.7	KO:K02346	Ga0394449_02672	k141_2708	Noviherbaspirillum sp. BP10	2831285802	MEGAHIT-QMFCE002AF.10.fa
Ga0394449_02672_57243_58163	30.0547	-10.345	3.19437	-3.23852	0.00120153	0.00235888	DE	NA	NA	NA	NA	NA	NA	NA	NA	NA	NA	recombination associated protein RdgC	KO:K03554	Bacteria;Proteobacteria;Betaproteobacteria;Burkholderiales;Oxalobacteraceae;Noviherbaspirillum;Noviherbaspirillum denitrificans;Noviherbaspirillum denitrificans TSA40	NA	KO:K03554	Ga0394449_02672	k141_2708	Noviherbaspirillum sp. BP10	2831285802	MEGAHIT-QMFCE002AF.10.fa
Ga0394449_02672_58305_58378	2.74419	-6.92542	3.93986	-1.75778	0.0787847	0.0968611	not_DE	NA	NA	NA	NA	NA	NA	NA	NA	NA	NA	tRNA_Asp_GTC	tRNA	NA	NA	NA	Ga0394449_02672	k141_2708	Noviherbaspirillum sp. BP10	2831285802	MEGAHIT-QMFCE002AF.10.fa
Ga0394449_02672_58598_59554	65.2876	-11.7002	2.0424	-5.72865	1.01235e-08	3.82647e-08	DE	NA	NA	NA	NA	NA	NA	NA	NA	NA	NA	proline iminopeptidase	KO:K01259	Bacteria;Proteobacteria;Betaproteobacteria;Burkholderiales;Oxalobacteraceae;Noviherbaspirillum;Noviherbaspirillum autotrophicum;Noviherbaspirillum autotrophicum TSA66	EC:3.4.11.5	KO:K01259	Ga0394449_02672	k141_2708	Noviherbaspirillum sp. BP10	2831285802	MEGAHIT-QMFCE002AF.10.fa
Ga0394449_02672_59574_60149	73.3879	-11.8057	2.21802	-5.32262	1.02281e-07	3.43326e-07	DE	NA	NA	NA	NA	NA	NA	NA	NA	NA	NA	ribosome-associated toxin RatA of RatAB toxin-antitoxin module	COG2867	Bacteria;Proteobacteria;Betaproteobacteria;Burkholderiales;Oxalobacteraceae;Noviherbaspirillum;Noviherbaspirillum sp. Root189;Noviherbaspirillum sp. Root189	NA	NA	Ga0394449_02672	k141_2708	Noviherbaspirillum sp. BP10	2831285802	MEGAHIT-QMFCE002AF.10.fa
Ga0394449_02672_60298_60855	77.9362	-11.743	3.02059	-3.88766	0.000101216	0.000238154	DE	NA	NA	NA	NA	NA	NA	NA	NA	NA	NA	protein TonB	KO:K03832	Bacteria;Proteobacteria;Betaproteobacteria;Burkholderiales;Oxalobacteraceae;Noviherbaspirillum;Noviherbaspirillum autotrophicum;Noviherbaspirillum autotrophicum TSA66	NA	KO:K03832	Ga0394449_02672	k141_2708	Noviherbaspirillum sp. BP10	2831285802	MEGAHIT-QMFCE002AF.10.fa
Ga0394449_02672_60950_61303	70.6152	-11.009	2.75962	-3.98933	6.6261e-05	0.000160276	DE	NA	NA	NA	NA	NA	NA	NA	NA	NA	NA	hypothetical protein	Hypo-rule applied	NA	NA	NA	Ga0394449_02672	k141_2708	Noviherbaspirillum sp. BP10	2831285802	MEGAHIT-QMFCE002AF.10.fa
Ga0394449_02672_61304_61816	140.39	-9.24603	2.33602	-3.95803	7.55691e-05	0.000181439	DE	NA	NA	NA	NA	NA	NA	NA	NA	NA	NA	hypothetical protein	Hypo-rule applied	Bacteria;Proteobacteria;Betaproteobacteria;Burkholderiales;Oxalobacteraceae;Noviherbaspirillum;Noviherbaspirillum autotrophicum;Noviherbaspirillum autotrophicum TSA66	NA	NA	Ga0394449_02672	k141_2708	Noviherbaspirillum sp. BP10	2831285802	MEGAHIT-QMFCE002AF.10.fa
Ga0394449_02672_61895_62290	65.8604	-11.4796	3.16064	-3.63204	0.000281194	0.000614839	DE	NA	NA	NA	NA	NA	NA	NA	NA	NA	NA	hypothetical protein	Hypo-rule applied	Bacteria;Proteobacteria;Betaproteobacteria;Burkholderiales;Oxalobacteraceae;Noviherbaspirillum;Noviherbaspirillum denitrificans;Noviherbaspirillum denitrificans TSA40	NA	NA	Ga0394449_02672	k141_2708	Noviherbaspirillum sp. BP10	2831285802	MEGAHIT-QMFCE002AF.10.fa
Ga0394449_02672_62445_63026	16.472	-9.46466	3.33189	-2.84063	0.00450252	0.0081573	DE	NA	NA	NA	NA	NA	NA	NA	NA	NA	NA	hypothetical protein	Hypo-rule applied	Bacteria;Proteobacteria;Betaproteobacteria;Burkholderiales;Oxalobacteraceae;Noviherbaspirillum;Noviherbaspirillum sp. Root189;Noviherbaspirillum sp. Root189	NA	NA	Ga0394449_02672	k141_2708	Noviherbaspirillum sp. BP10	2831285802	MEGAHIT-QMFCE002AF.10.fa
Ga0394449_02672_63185_64978	342.586	-14.0197	2.26162	-6.19897	5.68344e-10	2.43898e-09	DE	NA	NA	NA	NA	NA	NA	NA	NA	NA	NA	signal transduction histidine kinase	COG0642	Bacteria;Proteobacteria;Betaproteobacteria;Burkholderiales;Oxalobacteraceae;Noviherbaspirillum;Noviherbaspirillum autotrophicum;Noviherbaspirillum autotrophicum TSA66	NA	NA	Ga0394449_02672	k141_2708	Noviherbaspirillum sp. BP10	2831285802	MEGAHIT-QMFCE002AF.10.fa
Ga0394449_02672_65279_65581	33.6267	-6.92821	2.65143	-2.61301	0.00897483	0.0153212	DE	NA	NA	NA	NA	NA	NA	NA	NA	NA	NA	ElaB/YqjD/DUF883 family membrane-anchored ribosome-binding protein	COG4575	Bacteria;Proteobacteria;Betaproteobacteria;Burkholderiales;Oxalobacteraceae;Noviherbaspirillum;Noviherbaspirillum denitrificans;Noviherbaspirillum denitrificans TSA40	NA	NA	Ga0394449_02672	k141_2708	Noviherbaspirillum sp. BP10	2831285802	MEGAHIT-QMFCE002AF.10.fa
Ga0394449_02672_65589_65984	1.33839	-5.99971	3.98712	-1.50477	0.132382	0.153756	not_DE	NA	NA	NA	NA	NA	NA	NA	NA	0	0	uncharacterized membrane protein YqjE	COG5393	Bacteria;Proteobacteria;Betaproteobacteria;Burkholderiales;Oxalobacteraceae;Noviherbaspirillum;Noviherbaspirillum autotrophicum;Noviherbaspirillum autotrophicum TSA66	NA	NA	Ga0394449_02672	k141_2708	Noviherbaspirillum sp. BP10	2831285802	MEGAHIT-QMFCE002AF.10.fa
Ga0394449_02672_65994_66386	32.557	-10.4808	3.00866	-3.48354	0.000494824	0.00103628	DE	NA	NA	NA	NA	NA	NA	NA	NA	0	0	hypothetical protein	Hypo-rule applied	Bacteria;Proteobacteria;Betaproteobacteria;Burkholderiales;Oxalobacteraceae;Noviherbaspirillum;Noviherbaspirillum denitrificans;Noviherbaspirillum denitrificans TSA40	NA	NA	Ga0394449_02672	k141_2708	Noviherbaspirillum sp. BP10	2831285802	MEGAHIT-QMFCE002AF.10.fa
Ga0394449_02672_66484_67176	4.963	-4.25165	2.93567	-1.44827	0.147541	0.170712	not_DE	NA	26.35	NA	NA	NA	NA	26.35	NA	3	0	outer membrane protein OmpA-like peptidoglycan-associated protein	COG2885	Bacteria;Proteobacteria;Betaproteobacteria;Burkholderiales;Oxalobacteraceae;Noviherbaspirillum;Noviherbaspirillum sp. Root189;Noviherbaspirillum sp. Root189	NA	NA	Ga0394449_02672	k141_2708	Noviherbaspirillum sp. BP10	2831285802	MEGAHIT-QMFCE002AF.10.fa
Ga0394449_02672_67344_67571	82.7213	-12.091	1.91156	-6.32519	2.52913e-10	1.12983e-09	DE	NA	NA	NA	NA	NA	NA	NA	NA	NA	NA	tartrate dehydratase alpha subunit/fumarate hydratase class I-like protein	COG1951	NA	NA	NA	Ga0394449_02672	k141_2708	Noviherbaspirillum sp. BP10	2831285802	MEGAHIT-QMFCE002AF.10.fa
Ga0394449_02672_7662_8408	60.4619	-11.3492	3.25208	-3.48982	0.000483351	0.00101453	DE	NA	NA	NA	NA	NA	NA	NA	NA	NA	NA	endonuclease/exonuclease/phosphatase family metal-dependent hydrolase	COG3568	Bacteria;Proteobacteria;Betaproteobacteria;Burkholderiales;Oxalobacteraceae;Noviherbaspirillum;Noviherbaspirillum autotrophicum;Noviherbaspirillum autotrophicum TSA66	NA	NA	Ga0394449_02672	k141_2708	Noviherbaspirillum sp. BP10	2831285802	MEGAHIT-QMFCE002AF.10.fa
Ga0394449_02672_8509_9279	379.578	-14.1549	2.30752	-6.13423	NA	NA	not_DE	NA	NA	NA	NA	NA	NA	NA	NA	NA	NA	hypothetical protein	Hypo-rule applied	Bacteria;Proteobacteria;Betaproteobacteria;Burkholderiales;Oxalobacteraceae;Noviherbaspirillum;Noviherbaspirillum sp. Root189;Noviherbaspirillum sp. Root189	NA	NA	Ga0394449_02672	k141_2708	Noviherbaspirillum sp. BP10	2831285802	MEGAHIT-QMFCE002AF.10.fa
Ga0394449_02672_9355_9996	33.2577	-10.7495	1.97118	-5.45332	4.94386e-08	1.72665e-07	DE	NA	NA	NA	NA	NA	NA	NA	NA	NA	NA	uncharacterized protein (TIGR02271 family)	TIGR02271	Bacteria;Proteobacteria;Betaproteobacteria;Burkholderiales;Oxalobacteraceae;Noviherbaspirillum;Noviherbaspirillum autotrophicum;Noviherbaspirillum autotrophicum TSA66	NA	NA	Ga0394449_02672	k141_2708	Noviherbaspirillum sp. BP10	2831285802	MEGAHIT-QMFCE002AF.10.fa
Ga0394449_02985_100495_101334	307.241	-13.8164	2.44468	-5.65161	1.58951e-08	5.86551e-08	DE	NA	NA	NA	NA	NA	NA	NA	NA	NA	NA	small conductance mechanosensitive channel	KO:K03442	Bacteria;Proteobacteria;Betaproteobacteria;Burkholderiales;Oxalobacteraceae;Noviherbaspirillum;Noviherbaspirillum denitrificans;Noviherbaspirillum denitrificans TSA40	NA	KO:K03442	Ga0394449_02985	k141_3026	Noviherbaspirillum sp. BP10	2831285802	MEGAHIT-QMFCE002AF.10.fa
Ga0394449_02985_101432_101758	3.77326	-7.36463	3.91782	-1.87978	0.0601387	0.0775504	not_DE	NA	29.1944	NA	NA	NA	NA	29.1944	NA	3	0	outer membrane lipoprotein SlyB	COG3133	Bacteria;Proteobacteria;Betaproteobacteria;Burkholderiales;Oxalobacteraceae;Noviherbaspirillum;Noviherbaspirillum sp. Root189;Noviherbaspirillum sp. Root189	NA	NA	Ga0394449_02985	k141_3026	Noviherbaspirillum sp. BP10	2831285802	MEGAHIT-QMFCE002AF.10.fa
Ga0394449_02985_101742_101999	173.865	-10.926	1.68348	-6.4901	8.57809e-11	4.00454e-10	DE	NA	NA	NA	NA	NA	NA	NA	NA	NA	NA	hypothetical protein	Hypo-rule applied	NA	NA	NA	Ga0394449_02985	k141_3026	Noviherbaspirillum sp. BP10	2831285802	MEGAHIT-QMFCE002AF.10.fa
Ga0394449_02985_102362_103642	52.937	-11.4011	2.03932	-5.59063	2.26241e-08	8.17689e-08	DE	NA	NA	NA	NA	NA	NA	NA	NA	NA	NA	hypothetical protein	KO:K00786	Bacteria;Proteobacteria;Betaproteobacteria;Burkholderiales;Oxalobacteraceae;Noviherbaspirillum;Noviherbaspirillum sp. Root189;Noviherbaspirillum sp. Root189	NA	KO:K00786	Ga0394449_02985	k141_3026	Noviherbaspirillum sp. BP10	2831285802	MEGAHIT-QMFCE002AF.10.fa
Ga0394449_02985_103729_104508	73.4994	-11.9254	1.91608	-6.22382	4.85203e-10	2.10151e-09	DE	NA	NA	NA	NA	NA	NA	NA	NA	NA	NA	NAD(P)-dependent dehydrogenase (short-subunit alcohol dehydrogenase family)	COG1028	Bacteria;Proteobacteria;Betaproteobacteria;Burkholderiales;Oxalobacteraceae;Noviherbaspirillum;Noviherbaspirillum autotrophicum;Noviherbaspirillum autotrophicum TSA66	NA	NA	Ga0394449_02985	k141_3026	Noviherbaspirillum sp. BP10	2831285802	MEGAHIT-QMFCE002AF.10.fa
Ga0394449_02985_104557_105180	58.7503	-11.5936	1.9228	-6.02958	1.64387e-09	6.71487e-09	DE	NA	NA	NA	NA	NA	NA	NA	NA	NA	NA	histidinol-phosphate phosphatase family protein	TIGR01656	Bacteria;Proteobacteria;Betaproteobacteria;Burkholderiales;Oxalobacteraceae;Noviherbaspirillum;Noviherbaspirillum sp. Root189;Noviherbaspirillum sp. Root189	NA	NA	Ga0394449_02985	k141_3026	Noviherbaspirillum sp. BP10	2831285802	MEGAHIT-QMFCE002AF.10.fa
Ga0394449_02985_105177_106271	57.4801	-11.415	2.37565	-4.80499	1.54763e-06	4.51765e-06	DE	NA	NA	NA	NA	NA	NA	NA	NA	NA	NA	lipopolysaccharide heptosyltransferase II	TIGR02195	Bacteria;Proteobacteria;Betaproteobacteria;Burkholderiales;Oxalobacteraceae;Noviherbaspirillum;Noviherbaspirillum autotrophicum;Noviherbaspirillum autotrophicum TSA66	NA	NA	Ga0394449_02985	k141_3026	Noviherbaspirillum sp. BP10	2831285802	MEGAHIT-QMFCE002AF.10.fa
Ga0394449_02985_106407_107021	364.201	-10.4915	2.07362	-5.05953	4.20295e-07	1.30846e-06	DE	NA	NA	NA	NA	NA	NA	NA	NA	NA	NA	hemerythrin-like domain-containing protein	COG3945	Bacteria;Proteobacteria;Betaproteobacteria;Burkholderiales;Oxalobacteraceae;Noviherbaspirillum;Noviherbaspirillum sp. Root189;Noviherbaspirillum sp. Root189	NA	NA	Ga0394449_02985	k141_3026	Noviherbaspirillum sp. BP10	2831285802	MEGAHIT-QMFCE002AF.10.fa
Ga0394449_02985_107155_107835	25.0424	-10.3109	2.11165	-4.88287	1.04553e-06	3.11532e-06	DE	NA	NA	NA	NA	NA	NA	NA	NA	NA	NA	DNA end-binding protein Ku	KO:K10979	Bacteria;Proteobacteria;Betaproteobacteria;Burkholderiales;Oxalobacteraceae;Noviherbaspirillum;Noviherbaspirillum sp. Root189;Noviherbaspirillum sp. Root189	NA	KO:K10979	Ga0394449_02985	k141_3026	Noviherbaspirillum sp. BP10	2831285802	MEGAHIT-QMFCE002AF.10.fa
Ga0394449_02985_107892_108392	84.2757	-12.1203	1.91001	-6.34566	2.21472e-10	9.93532e-10	DE	NA	NA	NA	NA	NA	NA	NA	NA	NA	NA	uncharacterized membrane protein YcaP (DUF421 family)	COG2323	Bacteria;Proteobacteria;Betaproteobacteria;Burkholderiales;Oxalobacteraceae;Noviherbaspirillum;Noviherbaspirillum sp. Root189;Noviherbaspirillum sp. Root189	NA	NA	Ga0394449_02985	k141_3026	Noviherbaspirillum sp. BP10	2831285802	MEGAHIT-QMFCE002AF.10.fa
Ga0394449_02985_108577_109005	1792.05	-11.4136	1.24601	-9.16011	5.18451e-20	1.02107e-18	DE	NA	24.7245	NA	NA	NA	NA	24.7245	NA	2	0	sporulation protein YlmC with PRC-barrel domain	COG1873	Bacteria;Proteobacteria;Betaproteobacteria;Burkholderiales;Oxalobacteraceae;Noviherbaspirillum;Noviherbaspirillum autotrophicum;Noviherbaspirillum autotrophicum TSA66	NA	NA	Ga0394449_02985	k141_3026	Noviherbaspirillum sp. BP10	2831285802	MEGAHIT-QMFCE002AF.10.fa
Ga0394449_02985_109197_109790	223.073	-13.5367	1.87618	-7.21504	5.39174e-13	3.55341e-12	DE	NA	NA	NA	NA	NA	NA	NA	NA	NA	NA	sporulation protein YlmC with PRC-barrel domain	COG1873	Bacteria;Proteobacteria;Betaproteobacteria;Burkholderiales;Oxalobacteraceae;Noviherbaspirillum;Noviherbaspirillum sp. Root189;Noviherbaspirillum sp. Root189	NA	NA	Ga0394449_02985	k141_3026	Noviherbaspirillum sp. BP10	2831285802	MEGAHIT-QMFCE002AF.10.fa
Ga0394449_02985_109868_112489	1213.81	-11.8862	1.91614	-6.20318	5.53342e-10	2.37939e-09	DE	NA	NA	NA	NA	NA	NA	NA	NA	NA	NA	protoporphyrinogen oxidase/glycosyltransferase involved in cell wall biosynthesis	COG1232/COG0438	Bacteria;Proteobacteria;Betaproteobacteria;Burkholderiales;Oxalobacteraceae;Noviherbaspirillum;Noviherbaspirillum sp. Root189;Noviherbaspirillum sp. Root189	NA	NA	Ga0394449_02985	k141_3026	Noviherbaspirillum sp. BP10	2831285802	MEGAHIT-QMFCE002AF.10.fa
Ga0394449_02985_112491_113315	191.233	-13.2097	2.15875	-6.11913	9.40894e-10	3.93925e-09	DE	NA	NA	NA	NA	NA	NA	NA	NA	NA	NA	hypothetical protein	Hypo-rule applied	NA	NA	NA	Ga0394449_02985	k141_3026	Noviherbaspirillum sp. BP10	2831285802	MEGAHIT-QMFCE002AF.10.fa
Ga0394449_02985_113570_114475	717.546	-12.1559	1.81867	-6.68393	2.32611e-11	1.21165e-10	DE	NA	NA	NA	NA	NA	NA	NA	NA	NA	NA	UTP--glucose-1-phosphate uridylyltransferase	KO:K00963	Bacteria;Proteobacteria;Betaproteobacteria;Burkholderiales;Oxalobacteraceae;Noviherbaspirillum;Noviherbaspirillum denitrificans;Noviherbaspirillum denitrificans TSA40	EC:2.7.7.9	KO:K00963	Ga0394449_02985	k141_3026	Noviherbaspirillum sp. BP10	2831285802	MEGAHIT-QMFCE002AF.10.fa
Ga0394449_02985_114681_117560	1358.45	-12.0917	1.90666	-6.34185	2.27026e-10	1.01722e-09	DE	NA	NA	NA	NA	NA	NA	NA	NA	NA	NA	PAS domain S-box-containing protein	TIGR00229	Bacteria;Proteobacteria;Betaproteobacteria;Burkholderiales;Oxalobacteraceae;Noviherbaspirillum;Noviherbaspirillum autotrophicum;Noviherbaspirillum autotrophicum TSA66	NA	NA	Ga0394449_02985	k141_3026	Noviherbaspirillum sp. BP10	2831285802	MEGAHIT-QMFCE002AF.10.fa
Ga0394449_02985_117608_119005	683.065	-15.1014	1.99675	-7.56299	3.93907e-14	2.96802e-13	DE	NA	NA	NA	NA	NA	NA	NA	NA	0	0	DNA-binding NtrC family response regulator	COG2204	Bacteria;Proteobacteria;Betaproteobacteria;Burkholderiales;Oxalobacteraceae;Noviherbaspirillum;Noviherbaspirillum sp. Root189;Noviherbaspirillum sp. Root189	NA	NA	Ga0394449_02985	k141_3026	Noviherbaspirillum sp. BP10	2831285802	MEGAHIT-QMFCE002AF.10.fa
Ga0394449_02985_11831_12454	203.694	-10.0619	1.81552	-5.54215	2.98783e-08	1.06798e-07	DE	NA	NA	NA	NA	NA	NA	NA	NA	NA	NA	uncharacterized protein (TIGR00645 family)	TIGR00645	Bacteria;Proteobacteria;Betaproteobacteria;Burkholderiales;Oxalobacteraceae;Noviherbaspirillum;Noviherbaspirillum sp. Root189;Noviherbaspirillum sp. Root189	NA	NA	Ga0394449_02985	k141_3026	Noviherbaspirillum sp. BP10	2831285802	MEGAHIT-QMFCE002AF.10.fa
Ga0394449_02985_119388_119831	560.638	-11.0404	1.86274	-5.92693	3.0865e-09	1.22427e-08	DE	NA	NA	NA	NA	NA	NA	NA	NA	NA	NA	hyperosmotically inducible protein	KO:K04065	Bacteria;Proteobacteria;Betaproteobacteria;Burkholderiales;Oxalobacteraceae;Herminiimonas;Herminiimonas fonticola;Herminiimonas fonticola DSM 18555	NA	KO:K04065	Ga0394449_02985	k141_3026	Noviherbaspirillum sp. BP10	2831285802	MEGAHIT-QMFCE002AF.10.fa
Ga0394449_02985_119855_120082	115.69	-12.3056	3.07192	-4.00584	6.17964e-05	0.00015006	DE	NA	NA	NA	NA	NA	NA	NA	NA	0	0	uncharacterized membrane protein YgcG	COG1512	Bacteria;Proteobacteria;Betaproteobacteria;Burkholderiales;Oxalobacteraceae;Noviherbaspirillum;Noviherbaspirillum denitrificans;Noviherbaspirillum denitrificans TSA40	NA	NA	Ga0394449_02985	k141_3026	Noviherbaspirillum sp. BP10	2831285802	MEGAHIT-QMFCE002AF.10.fa
Ga0394449_02985_120495_121517	284.025	-9.89327	1.89525	-5.22003	1.78895e-07	5.8345e-07	DE	NA	NA	NA	NA	NA	NA	NA	NA	NA	NA	DNA-binding NtrC family response regulator	COG2204	Bacteria;Proteobacteria;Betaproteobacteria;Burkholderiales;Oxalobacteraceae;Noviherbaspirillum;Noviherbaspirillum sp. Root189;Noviherbaspirillum sp. Root189	NA	NA	Ga0394449_02985	k141_3026	Noviherbaspirillum sp. BP10	2831285802	MEGAHIT-QMFCE002AF.10.fa
Ga0394449_02985_121544_122416	284.497	-13.8274	2.02868	-6.81596	9.36372e-12	5.1129e-11	DE	NA	NA	NA	NA	NA	NA	NA	NA	NA	NA	hypothetical protein	KO:K00540	Bacteria;Proteobacteria;Betaproteobacteria;Burkholderiales;Oxalobacteraceae;Noviherbaspirillum;Noviherbaspirillum denitrificans;Noviherbaspirillum denitrificans TSA40	NA	KO:K00540	Ga0394449_02985	k141_3026	Noviherbaspirillum sp. BP10	2831285802	MEGAHIT-QMFCE002AF.10.fa
Ga0394449_02985_122441_122635	48.7732	-27.254	3.912	-6.96677	3.24295e-12	1.89181e-11	DE	NA	NA	NA	NA	NA	NA	NA	NA	NA	NA	hypothetical protein	Hypo-rule applied	Bacteria;Proteobacteria;Betaproteobacteria;Burkholderiales;Oxalobacteraceae;Noviherbaspirillum;Noviherbaspirillum sp. Root189;Noviherbaspirillum sp. Root189	NA	NA	Ga0394449_02985	k141_3026	Noviherbaspirillum sp. BP10	2831285802	MEGAHIT-QMFCE002AF.10.fa
Ga0394449_02985_122767_123882	123.381	-9.45604	1.91602	-4.93526	8.00453e-07	2.41983e-06	DE	NA	NA	NA	NA	NA	NA	NA	NA	NA	NA	tRNA-dihydrouridine synthase A	KO:K05539	Bacteria;Proteobacteria;Betaproteobacteria;Burkholderiales;Oxalobacteraceae;Noviherbaspirillum;Noviherbaspirillum sp. Root189;Noviherbaspirillum sp. Root189	EC:1.-	KO:K05539	Ga0394449_02985	k141_3026	Noviherbaspirillum sp. BP10	2831285802	MEGAHIT-QMFCE002AF.10.fa
Ga0394449_02985_123863_124756	140.724	-28.7097	3.46007	-8.29743	NA	NA	not_DE	NA	NA	NA	NA	NA	NA	NA	NA	NA	NA	drug/metabolite transporter (DMT)-like permease	COG0697	Bacteria;Proteobacteria;Betaproteobacteria;Burkholderiales;Oxalobacteraceae;Noviherbaspirillum;Noviherbaspirillum autotrophicum;Noviherbaspirillum autotrophicum TSA66	NA	NA	Ga0394449_02985	k141_3026	Noviherbaspirillum sp. BP10	2831285802	MEGAHIT-QMFCE002AF.10.fa
Ga0394449_02985_124869_126704	585.008	-9.08893	2.1596	-4.20862	2.56931e-05	6.55899e-05	DE	NA	NA	NA	NA	NA	NA	NA	NA	0	0	GTP-binding protein	KO:K06207	Bacteria;Proteobacteria;Betaproteobacteria;Burkholderiales;Oxalobacteraceae;Noviherbaspirillum;Noviherbaspirillum sp. Root189;Noviherbaspirillum sp. Root189	NA	KO:K06207	Ga0394449_02985	k141_3026	Noviherbaspirillum sp. BP10	2831285802	MEGAHIT-QMFCE002AF.10.fa
Ga0394449_02985_126803_127741	103.906	-12.1273	3.28606	-3.69055	0.000223773	0.000498333	DE	NA	NA	NA	NA	NA	NA	NA	NA	NA	NA	tRNA pseudouridine55 synthase	KO:K03177	Bacteria;Proteobacteria;Betaproteobacteria;Burkholderiales;Oxalobacteraceae;Noviherbaspirillum;Noviherbaspirillum autotrophicum;Noviherbaspirillum autotrophicum TSA66	EC:5.4.99.25	KO:K03177	Ga0394449_02985	k141_3026	Noviherbaspirillum sp. BP10	2831285802	MEGAHIT-QMFCE002AF.10.fa
Ga0394449_02985_127786_128175	179.875	-13.1605	2.04133	-6.44705	1.14048e-10	5.26814e-10	DE	NA	NA	NA	NA	NA	NA	NA	NA	NA	NA	ribosome-binding factor A	KO:K02834	Bacteria;Proteobacteria;Betaproteobacteria;Burkholderiales;Oxalobacteraceae;Noviherbaspirillum;Noviherbaspirillum autotrophicum;Noviherbaspirillum autotrophicum TSA66	NA	KO:K02834	Ga0394449_02985	k141_3026	Noviherbaspirillum sp. BP10	2831285802	MEGAHIT-QMFCE002AF.10.fa
Ga0394449_02985_128293_131118	504.21	-7.75965	1.4435	-5.37559	7.63317e-08	2.59077e-07	DE	NA	24.2755	NA	NA	NA	NA	NA	24.2755	0	3	translation initiation factor IF-2	KO:K02519	Bacteria;Proteobacteria;Betaproteobacteria;Burkholderiales;Oxalobacteraceae;Noviherbaspirillum;Noviherbaspirillum autotrophicum;Noviherbaspirillum autotrophicum TSA66	NA	KO:K02519	Ga0394449_02985	k141_3026	Noviherbaspirillum sp. BP10	2831285802	MEGAHIT-QMFCE002AF.10.fa
Ga0394449_02985_1_3036	274.712	-9.92856	2.12907	-4.66334	3.11114e-06	8.77964e-06	DE	NA	NA	NA	NA	NA	NA	NA	NA	NA	NA	methylmalonyl-CoA mutase	KO:K11942	Bacteria;Proteobacteria;Betaproteobacteria;Burkholderiales;Oxalobacteraceae;Noviherbaspirillum;Noviherbaspirillum denitrificans;Noviherbaspirillum denitrificans TSA40	EC:5.4.99.2	KO:K11942	Ga0394449_02985	k141_3026	Noviherbaspirillum sp. BP10	2831285802	MEGAHIT-QMFCE002AF.10.fa
Ga0394449_02985_131166_132725	787.867	-7.48679	1.50824	-4.96394	6.90778e-07	2.10532e-06	DE	NA	24.6472	NA	NA	NA	NA	NA	24.6472	0	3	N utilization substance protein A	KO:K02600	Bacteria;Proteobacteria;Betaproteobacteria;Burkholderiales;Oxalobacteraceae;Noviherbaspirillum;Noviherbaspirillum sp. Root189;Noviherbaspirillum sp. Root189	NA	KO:K02600	Ga0394449_02985	k141_3026	Noviherbaspirillum sp. BP10	2831285802	MEGAHIT-QMFCE002AF.10.fa
Ga0394449_02985_132722_133309	189.016	-5.96906	2.28651	-2.61056	0.00903946	0.0153946	DE	NA	NA	NA	NA	NA	NA	NA	NA	NA	NA	ribosome maturation factor RimP	KO:K09748	Bacteria;Proteobacteria;Betaproteobacteria;Burkholderiales;Oxalobacteraceae;Noviherbaspirillum;Noviherbaspirillum denitrificans;Noviherbaspirillum denitrificans TSA40	NA	KO:K09748	Ga0394449_02985	k141_3026	Noviherbaspirillum sp. BP10	2831285802	MEGAHIT-QMFCE002AF.10.fa
Ga0394449_02985_133477_135075	176.096	-8.75813	1.98807	-4.40534	1.0562e-05	2.80165e-05	DE	NA	NA	NA	NA	NA	NA	NA	NA	NA	NA	23S rRNA pseudouridine2605 synthase	KO:K06178	Bacteria;Proteobacteria;Betaproteobacteria;Burkholderiales;Oxalobacteraceae;Noviherbaspirillum;Noviherbaspirillum autotrophicum;Noviherbaspirillum autotrophicum TSA66	EC:5.4.99.22	KO:K06178	Ga0394449_02985	k141_3026	Noviherbaspirillum sp. BP10	2831285802	MEGAHIT-QMFCE002AF.10.fa
Ga0394449_02985_135035_135937	984.801	-3.19832	1.76415	-1.81295	0.0698398	0.0893428	not_DE	NA	NA	NA	NA	NA	NA	NA	NA	NA	NA	segregation and condensation protein B	KO:K06024	Bacteria;Proteobacteria;Betaproteobacteria;Burkholderiales;Oxalobacteraceae;Noviherbaspirillum;Noviherbaspirillum denitrificans;Noviherbaspirillum denitrificans TSA40	NA	KO:K06024	Ga0394449_02985	k141_3026	Noviherbaspirillum sp. BP10	2831285802	MEGAHIT-QMFCE002AF.10.fa
Ga0394449_02985_136098_136171	41.5906	-4.38974	1.60959	-2.72725	0.00638647	0.0112724	DE	NA	NA	NA	NA	NA	NA	NA	NA	NA	NA	tRNA_Met_CAT	tRNA	NA	NA	NA	Ga0394449_02985	k141_3026	Noviherbaspirillum sp. BP10	2831285802	MEGAHIT-QMFCE002AF.10.fa
Ga0394449_02985_136322_136897	324.384	-9.79343	2.43511	-4.02175	5.77661e-05	0.0001408	DE	NA	NA	NA	NA	NA	NA	NA	NA	NA	NA	ADP-ribose pyrophosphatase YjhB (NUDIX family)	COG1051	Bacteria;Proteobacteria;Betaproteobacteria;Burkholderiales;Oxalobacteraceae;Noviherbaspirillum;Noviherbaspirillum autotrophicum;Noviherbaspirillum autotrophicum TSA66	NA	NA	Ga0394449_02985	k141_3026	Noviherbaspirillum sp. BP10	2831285802	MEGAHIT-QMFCE002AF.10.fa
Ga0394449_02985_136991_138256	124.502	-8.49056	2.76915	-3.06613	0.0021685	0.00409877	DE	NA	NA	NA	NA	NA	NA	NA	NA	NA	NA	Amt family ammonium transporter	KO:K03320	Bacteria;Proteobacteria;Betaproteobacteria;Burkholderiales;Oxalobacteraceae;Noviherbaspirillum;Noviherbaspirillum autotrophicum;Noviherbaspirillum autotrophicum TSA66	NA	KO:K03320	Ga0394449_02985	k141_3026	Noviherbaspirillum sp. BP10	2831285802	MEGAHIT-QMFCE002AF.10.fa
Ga0394449_02985_138377_139099	375.048	-13.5707	1.85958	-7.29771	2.92716e-13	1.99608e-12	DE	NA	NA	NA	NA	NA	NA	NA	NA	NA	NA	leucyl/phenylalanyl-tRNA--protein transferase	KO:K00684	Bacteria;Proteobacteria;Betaproteobacteria;Burkholderiales;Oxalobacteraceae;Noviherbaspirillum;Noviherbaspirillum denitrificans;Noviherbaspirillum denitrificans TSA40	EC:2.3.2.6	KO:K00684	Ga0394449_02985	k141_3026	Noviherbaspirillum sp. BP10	2831285802	MEGAHIT-QMFCE002AF.10.fa
Ga0394449_02985_139176_139928	150.443	-11.17	2.68253	-4.16397	3.12754e-05	7.90568e-05	DE	NA	NA	NA	NA	NA	NA	NA	NA	NA	NA	arginine-tRNA-protein transferase	KO:K00685	Bacteria;Proteobacteria;Betaproteobacteria;Burkholderiales;Oxalobacteraceae;Noviherbaspirillum;Noviherbaspirillum denitrificans;Noviherbaspirillum denitrificans TSA40	EC:2.3.2.8	KO:K00685	Ga0394449_02985	k141_3026	Noviherbaspirillum sp. BP10	2831285802	MEGAHIT-QMFCE002AF.10.fa
Ga0394449_02985_140010_141053	164.319	-12.981	2.18519	-5.94046	2.84222e-09	1.13038e-08	DE	NA	NA	NA	NA	NA	NA	NA	NA	NA	NA	dihydroorotate dehydrogenase	KO:K00254	Bacteria;Proteobacteria;Betaproteobacteria;Burkholderiales;Oxalobacteraceae;Noviherbaspirillum;Noviherbaspirillum autotrophicum;Noviherbaspirillum autotrophicum TSA66	EC:1.3.5.2	KO:K00254	Ga0394449_02985	k141_3026	Noviherbaspirillum sp. BP10	2831285802	MEGAHIT-QMFCE002AF.10.fa
Ga0394449_02985_141114_142157	303.015	-7.15075	1.69579	-4.21677	2.47828e-05	6.33634e-05	DE	NA	NA	NA	NA	NA	NA	NA	NA	NA	NA	aryl-alcohol dehydrogenase-like predicted oxidoreductase	COG0667	Bacteria;Proteobacteria;Betaproteobacteria;Burkholderiales;Oxalobacteraceae;Noviherbaspirillum;Noviherbaspirillum sp. Root189;Noviherbaspirillum sp. Root189	NA	NA	Ga0394449_02985	k141_3026	Noviherbaspirillum sp. BP10	2831285802	MEGAHIT-QMFCE002AF.10.fa
Ga0394449_02985_14116_14469	219.968	-4.67394	1.94921	-2.39787	0.0164909	0.0261493	DE	NA	NA	NA	NA	NA	NA	NA	NA	NA	NA	AhpD family alkylhydroperoxidase	TIGR00778	Bacteria;Proteobacteria;Betaproteobacteria;Rhodocyclales;Zoogloeaceae;Azoarcus;Azoarcus sp. PA01;Azoarcus sp. PA01	NA	NA	Ga0394449_02985	k141_3026	Noviherbaspirillum sp. BP10	2831285802	MEGAHIT-QMFCE002AF.10.fa
Ga0394449_02985_142252_144552	2426.37	-7.65062	1.61756	-4.72974	2.24807e-06	6.44778e-06	DE	NA	23.3681	NA	NA	NA	NA	NA	23.3681	0	3	ATP-dependent Clp protease ATP-binding subunit ClpA	KO:K03694	Bacteria;Proteobacteria;Betaproteobacteria;Burkholderiales;Oxalobacteraceae;Noviherbaspirillum;Noviherbaspirillum denitrificans;Noviherbaspirillum denitrificans TSA40	NA	KO:K03694	Ga0394449_02985	k141_3026	Noviherbaspirillum sp. BP10	2831285802	MEGAHIT-QMFCE002AF.10.fa
Ga0394449_02985_144549_144857	986.978	-10.3154	2.06543	-4.99431	5.90469e-07	1.81479e-06	DE	NA	NA	NA	NA	NA	NA	NA	NA	NA	NA	ATP-dependent Clp protease adaptor protein ClpS	KO:K06891	Bacteria;Proteobacteria;Betaproteobacteria;Burkholderiales;Oxalobacteraceae;Noviherbaspirillum;Noviherbaspirillum denitrificans;Noviherbaspirillum denitrificans TSA40	NA	KO:K06891	Ga0394449_02985	k141_3026	Noviherbaspirillum sp. BP10	2831285802	MEGAHIT-QMFCE002AF.10.fa
Ga0394449_02985_14520_15089	84.4089	-10.1859	1.98987	-5.11887	3.07379e-07	9.74606e-07	DE	NA	NA	NA	NA	NA	NA	NA	NA	NA	NA	hypothetical protein	Hypo-rule applied	Bacteria;Proteobacteria;Betaproteobacteria;Burkholderiales;Oxalobacteraceae;Herminiimonas;Herminiimonas sp. CN;Herminiimonas sp. CN	NA	NA	Ga0394449_02985	k141_3026	Noviherbaspirillum sp. BP10	2831285802	MEGAHIT-QMFCE002AF.10.fa
Ga0394449_02985_145610_146965	294.505	-9.30468	2.15546	-4.31679	1.58311e-05	4.1347e-05	DE	NA	NA	NA	NA	NA	NA	NA	NA	NA	NA	two-component system NarL family sensor kinase	KO:K02480	Bacteria;Proteobacteria;Betaproteobacteria;Burkholderiales;Oxalobacteraceae;Noviherbaspirillum;Noviherbaspirillum denitrificans;Noviherbaspirillum denitrificans TSA40	EC:2.7.13.3	KO:K02480	Ga0394449_02985	k141_3026	Noviherbaspirillum sp. BP10	2831285802	MEGAHIT-QMFCE002AF.10.fa
Ga0394449_02985_146974_147603	93.4418	-7.33436	2.07032	-3.54262	0.000396171	0.000844357	DE	NA	NA	NA	NA	NA	NA	NA	NA	NA	NA	DNA-binding NarL/FixJ family response regulator	COG2197	Bacteria;Proteobacteria;Betaproteobacteria;Burkholderiales;Oxalobacteraceae;Noviherbaspirillum;Noviherbaspirillum sp. Root189;Noviherbaspirillum sp. Root189	NA	NA	Ga0394449_02985	k141_3026	Noviherbaspirillum sp. BP10	2831285802	MEGAHIT-QMFCE002AF.10.fa
Ga0394449_02985_149234_149833	221.968	-29.3391	3.90792	-7.50761	NA	NA	not_DE	NA	NA	NA	NA	NA	NA	NA	NA	NA	NA	23S rRNA pseudouridine2457 synthase	KO:K06181	Bacteria;Proteobacteria;Betaproteobacteria;Burkholderiales;Oxalobacteraceae;Noviherbaspirillum;Noviherbaspirillum denitrificans;Noviherbaspirillum denitrificans TSA40	EC:5.4.99.20	KO:K06181	Ga0394449_02985	k141_3026	Noviherbaspirillum sp. BP10	2831285802	MEGAHIT-QMFCE002AF.10.fa
Ga0394449_02985_149896_150159	228.973	-9.29563	2.19327	-4.23826	2.25262e-05	5.78814e-05	DE	NA	NA	NA	NA	NA	NA	NA	NA	NA	NA	prophage tail gpP-like protein	COG4379	Bacteria;Proteobacteria;Betaproteobacteria;Burkholderiales;Oxalobacteraceae;Herbaspirillum;Herbaspirillum sp.;Herbaspirillum sp. Sphag64	NA	NA	Ga0394449_02985	k141_3026	Noviherbaspirillum sp. BP10	2831285802	MEGAHIT-QMFCE002AF.10.fa
Ga0394449_02985_150328_150780	494.547	-10.8981	2.43658	-4.47272	7.72308e-06	2.08377e-05	DE	NA	NA	NA	NA	NA	NA	NA	NA	NA	NA	hypothetical protein	KO:K09005	Bacteria;Proteobacteria;Betaproteobacteria;Burkholderiales;Oxalobacteraceae;Noviherbaspirillum;Noviherbaspirillum denitrificans;Noviherbaspirillum denitrificans TSA40	NA	KO:K09005	Ga0394449_02985	k141_3026	Noviherbaspirillum sp. BP10	2831285802	MEGAHIT-QMFCE002AF.10.fa
Ga0394449_02985_150973_151239	301.378	-4.74811	1.83646	-2.58546	0.00972481	0.0164604	DE	NA	NA	NA	NA	NA	NA	NA	NA	0	0	small subunit ribosomal protein S20	KO:K02968	Bacteria;Proteobacteria;Betaproteobacteria;Burkholderiales;Oxalobacteraceae;Noviherbaspirillum;Noviherbaspirillum denitrificans;Noviherbaspirillum denitrificans TSA40	NA	KO:K02968	Ga0394449_02985	k141_3026	Noviherbaspirillum sp. BP10	2831285802	MEGAHIT-QMFCE002AF.10.fa
Ga0394449_02985_151503_153053	349.42	-9.38437	2.12215	-4.4221	NA	NA	not_DE	NA	NA	NA	NA	NA	NA	NA	NA	NA	NA	putative peptidoglycan lipid II flippase	KO:K03980	Bacteria;Proteobacteria;Betaproteobacteria;Burkholderiales;Oxalobacteraceae;Noviherbaspirillum;Noviherbaspirillum denitrificans;Noviherbaspirillum denitrificans TSA40	NA	KO:K03980	Ga0394449_02985	k141_3026	Noviherbaspirillum sp. BP10	2831285802	MEGAHIT-QMFCE002AF.10.fa
Ga0394449_02985_153130_153969	395.259	-7.62947	1.56792	-4.86597	1.13896e-06	3.38224e-06	DE	NA	NA	NA	NA	NA	NA	NA	NA	NA	NA	regulator of sirC expression with transglutaminase-like and TPR domain	COG2912	Bacteria;Proteobacteria;Betaproteobacteria;Burkholderiales;Oxalobacteraceae;Noviherbaspirillum;Noviherbaspirillum autotrophicum;Noviherbaspirillum autotrophicum TSA66	NA	NA	Ga0394449_02985	k141_3026	Noviherbaspirillum sp. BP10	2831285802	MEGAHIT-QMFCE002AF.10.fa
Ga0394449_02985_15366_15812	46.8771	-6.62843	2.73754	-2.42131	0.0154646	0.0247295	DE	NA	NA	NA	NA	NA	NA	NA	NA	NA	NA	DNA-binding MarR family transcriptional regulator	COG1846	Bacteria;Proteobacteria;Betaproteobacteria;Burkholderiales;Oxalobacteraceae;Noviherbaspirillum;Noviherbaspirillum autotrophicum;Noviherbaspirillum autotrophicum TSA66	NA	NA	Ga0394449_02985	k141_3026	Noviherbaspirillum sp. BP10	2831285802	MEGAHIT-QMFCE002AF.10.fa
Ga0394449_02985_153995_155920	510.532	-9.1625	1.68976	-5.42238	5.88117e-08	2.02745e-07	DE	NA	NA	NA	NA	NA	NA	NA	NA	NA	NA	ATP-binding cassette subfamily F protein uup	KO:K15738	Bacteria;Proteobacteria;Betaproteobacteria;Burkholderiales;Oxalobacteraceae;Noviherbaspirillum;Noviherbaspirillum autotrophicum;Noviherbaspirillum autotrophicum TSA66	NA	KO:K15738	Ga0394449_02985	k141_3026	Noviherbaspirillum sp. BP10	2831285802	MEGAHIT-QMFCE002AF.10.fa
Ga0394449_02985_156054_156128	42.801	-26.5613	3.91272	-6.78845	1.13344e-11	6.12403e-11	DE	NA	NA	NA	NA	NA	NA	NA	NA	NA	NA	tRNA_Arg_CCT	tRNA	NA	NA	NA	Ga0394449_02985	k141_3026	Noviherbaspirillum sp. BP10	2831285802	MEGAHIT-QMFCE002AF.10.fa
Ga0394449_02985_156282_156449	525.053	-14.7097	2.03148	-7.24087	4.45802e-13	2.97215e-12	DE	NA	NA	NA	NA	NA	NA	NA	NA	NA	NA	hypothetical protein	Hypo-rule applied	NA	NA	NA	Ga0394449_02985	k141_3026	Noviherbaspirillum sp. BP10	2831285802	MEGAHIT-QMFCE002AF.10.fa
Ga0394449_02985_156622_156924	116.089	-7.02021	1.55485	-4.51503	6.3307e-06	1.72523e-05	DE	NA	NA	NA	NA	NA	NA	NA	NA	NA	NA	uncharacterized protein YecT (DUF1311 family)	COG3755	Bacteria;Proteobacteria;Betaproteobacteria;Burkholderiales;Oxalobacteraceae;Noviherbaspirillum;Noviherbaspirillum autotrophicum;Noviherbaspirillum autotrophicum TSA66	NA	NA	Ga0394449_02985	k141_3026	Noviherbaspirillum sp. BP10	2831285802	MEGAHIT-QMFCE002AF.10.fa
Ga0394449_02985_157047_157898	77.5355	-7.94028	3.01159	-2.63657	0.0083748	0.0143989	DE	NA	NA	NA	NA	NA	NA	NA	NA	NA	NA	2-keto-4-pentenoate hydratase/2-oxohepta-3-ene-1,7-dioic acid hydratase in catechol pathway	COG0179	Bacteria;Proteobacteria;Betaproteobacteria;Burkholderiales;Oxalobacteraceae;Noviherbaspirillum;Noviherbaspirillum sp. Root189;Noviherbaspirillum sp. Root189	NA	NA	Ga0394449_02985	k141_3026	Noviherbaspirillum sp. BP10	2831285802	MEGAHIT-QMFCE002AF.10.fa
Ga0394449_02985_158197_159198	103.653	-9.01816	2.72415	-3.31045	0.000931465	0.00185746	DE	NA	NA	NA	NA	NA	NA	NA	NA	NA	NA	triacylglycerol lipase	KO:K01046	Bacteria;Proteobacteria;Betaproteobacteria;Burkholderiales;Oxalobacteraceae;Collimonas;Collimonas sp. PA-H2;Collimonas sp. PA-H2	EC:3.1.1.3	KO:K01046	Ga0394449_02985	k141_3026	Noviherbaspirillum sp. BP10	2831285802	MEGAHIT-QMFCE002AF.10.fa
Ga0394449_02985_15855_16697	187.462	-9.26796	2.90942	-3.1855	0.00144503	0.00279824	DE	NA	NA	NA	NA	NA	NA	NA	NA	NA	NA	glutamate racemase	KO:K01776	Bacteria;Proteobacteria;Betaproteobacteria;Burkholderiales;Oxalobacteraceae;Noviherbaspirillum;Noviherbaspirillum sp. Root189;Noviherbaspirillum sp. Root189	EC:5.1.1.3	KO:K01776	Ga0394449_02985	k141_3026	Noviherbaspirillum sp. BP10	2831285802	MEGAHIT-QMFCE002AF.10.fa
Ga0394449_02985_159221_160234	170.769	-12.9397	2.58586	-5.00403	5.61441e-07	1.72771e-06	DE	NA	NA	NA	NA	NA	NA	NA	NA	NA	NA	lipase chaperone LimK	COG5380	Bacteria;Proteobacteria;Betaproteobacteria;Burkholderiales;Oxalobacteraceae;Collimonas;Collimonas arenae;Collimonas arenae Ter282	NA	NA	Ga0394449_02985	k141_3026	Noviherbaspirillum sp. BP10	2831285802	MEGAHIT-QMFCE002AF.10.fa
Ga0394449_02985_160239_160895	80.7253	-9.38574	3.69014	-2.54346	NA	NA	not_DE	NA	NA	NA	NA	NA	NA	NA	NA	NA	NA	maleylacetoacetate isomerase	TIGR01262	Bacteria;Proteobacteria;Betaproteobacteria;Burkholderiales;Oxalobacteraceae;Noviherbaspirillum;Noviherbaspirillum denitrificans;Noviherbaspirillum denitrificans TSA40	NA	NA	Ga0394449_02985	k141_3026	Noviherbaspirillum sp. BP10	2831285802	MEGAHIT-QMFCE002AF.10.fa
Ga0394449_02985_160921_161700	434.065	-6.68811	1.5567	-4.29635	1.73637e-05	4.50894e-05	DE	NA	NA	NA	NA	NA	NA	NA	NA	0	0	fumarylpyruvate hydrolase	KO:K16165	Bacteria;Proteobacteria;Betaproteobacteria;Burkholderiales;Oxalobacteraceae;Noviherbaspirillum;Noviherbaspirillum denitrificans;Noviherbaspirillum denitrificans TSA40	EC:3.7.1.20	KO:K16165	Ga0394449_02985	k141_3026	Noviherbaspirillum sp. BP10	2831285802	MEGAHIT-QMFCE002AF.10.fa
Ga0394449_02985_161862_162587	167.242	-11.0196	1.76607	-6.23962	4.38632e-10	1.90811e-09	DE	NA	NA	NA	NA	NA	NA	NA	NA	NA	NA	branched-chain amino acid transport system ATP-binding protein	KO:K01996	Bacteria;Proteobacteria;Betaproteobacteria;Burkholderiales;Oxalobacteraceae;Noviherbaspirillum;Noviherbaspirillum autotrophicum;Noviherbaspirillum autotrophicum TSA66	NA	KO:K01996	Ga0394449_02985	k141_3026	Noviherbaspirillum sp. BP10	2831285802	MEGAHIT-QMFCE002AF.10.fa
Ga0394449_02985_162587_163357	266.032	-11.0404	2.1149	-5.22031	1.7862e-07	5.82682e-07	DE	NA	24.2201	NA	NA	NA	NA	24.2201	NA	3	0	branched-chain amino acid transport system ATP-binding protein	KO:K01995	Bacteria;Proteobacteria;Betaproteobacteria;Burkholderiales;Oxalobacteraceae;Noviherbaspirillum;Noviherbaspirillum autotrophicum;Noviherbaspirillum autotrophicum TSA66	NA	KO:K01995	Ga0394449_02985	k141_3026	Noviherbaspirillum sp. BP10	2831285802	MEGAHIT-QMFCE002AF.10.fa
Ga0394449_02985_163367_164587	238.798	-13.6006	1.96004	-6.93895	3.95026e-12	2.26114e-11	DE	NA	NA	NA	NA	NA	NA	NA	NA	NA	NA	branched-chain amino acid transport system permease protein	KO:K01998	Bacteria;Proteobacteria;Betaproteobacteria;Burkholderiales;Oxalobacteraceae;Noviherbaspirillum;Noviherbaspirillum sp. Root189;Noviherbaspirillum sp. Root189	NA	KO:K01998	Ga0394449_02985	k141_3026	Noviherbaspirillum sp. BP10	2831285802	MEGAHIT-QMFCE002AF.10.fa
Ga0394449_02985_164599_165528	407.286	-8.44672	2.04271	-4.13507	3.54852e-05	8.90947e-05	DE	NA	NA	NA	NA	NA	NA	NA	NA	0	0	branched-chain amino acid transport system permease protein	KO:K01997	Bacteria;Proteobacteria;Betaproteobacteria;Burkholderiales;Oxalobacteraceae;Noviherbaspirillum;Noviherbaspirillum sp. Root189;Noviherbaspirillum sp. Root189	NA	KO:K01997	Ga0394449_02985	k141_3026	Noviherbaspirillum sp. BP10	2831285802	MEGAHIT-QMFCE002AF.10.fa
Ga0394449_02985_166262_167203	225.298	-10.454	1.89716	-5.51033	3.58154e-08	1.26776e-07	DE	NA	NA	NA	NA	NA	NA	NA	NA	NA	NA	4-hydroxy-3-methylbut-2-enyl diphosphate reductase	KO:K03527	Bacteria;Proteobacteria;Betaproteobacteria;Burkholderiales;Oxalobacteraceae;Noviherbaspirillum;Noviherbaspirillum denitrificans;Noviherbaspirillum denitrificans TSA40	EC:1.17.1.2	KO:K03527	Ga0394449_02985	k141_3026	Noviherbaspirillum sp. BP10	2831285802	MEGAHIT-QMFCE002AF.10.fa
Ga0394449_02985_167237_167692	261.773	-10.9725	1.92824	-5.6904	1.2674e-08	4.73893e-08	DE	NA	NA	NA	NA	NA	NA	NA	NA	0	0	FKBP-type peptidyl-prolyl cis-trans isomerase SlpA	KO:K03774	Bacteria;Proteobacteria;Betaproteobacteria;Burkholderiales;Oxalobacteraceae;Noviherbaspirillum;Noviherbaspirillum autotrophicum;Noviherbaspirillum autotrophicum TSA66	EC:5.2.1.8	KO:K03774	Ga0394449_02985	k141_3026	Noviherbaspirillum sp. BP10	2831285802	MEGAHIT-QMFCE002AF.10.fa
Ga0394449_02985_16779_16854	10.9491	-8.83709	3.87723	-2.27923	0.0226533	0.0342448	DE	NA	NA	NA	NA	NA	NA	NA	NA	NA	NA	tRNA_His_GTG	tRNA	NA	NA	NA	Ga0394449_02985	k141_3026	Noviherbaspirillum sp. BP10	2831285802	MEGAHIT-QMFCE002AF.10.fa
Ga0394449_02985_167890_168564	200.134	-13.3525	1.94434	-6.86734	6.5408e-12	3.63259e-11	DE	NA	NA	NA	NA	NA	NA	NA	NA	NA	NA	DNA repair protein RadC	KO:K03630	Bacteria;Proteobacteria;Betaproteobacteria;Burkholderiales;Oxalobacteraceae;Noviherbaspirillum;Noviherbaspirillum autotrophicum;Noviherbaspirillum autotrophicum TSA66	NA	KO:K03630	Ga0394449_02985	k141_3026	Noviherbaspirillum sp. BP10	2831285802	MEGAHIT-QMFCE002AF.10.fa
Ga0394449_02985_168970_169137	575.425	-5.14225	1.64497	-3.12605	0.00177172	0.00338782	DE	NA	NA	NA	NA	NA	NA	NA	NA	NA	NA	large subunit ribosomal protein L33	KO:K02913	Bacteria;Proteobacteria;Betaproteobacteria;Burkholderiales;Oxalobacteraceae;Noviherbaspirillum;Noviherbaspirillum sp. Root189;Noviherbaspirillum sp. Root189	NA	KO:K02913	Ga0394449_02985	k141_3026	Noviherbaspirillum sp. BP10	2831285802	MEGAHIT-QMFCE002AF.10.fa
Ga0394449_02985_16924_17673	76.928	-4.41356	1.96291	-2.24848	0.0245454	0.0366634	DE	NA	25.0358	NA	NA	NA	NA	NA	25.0358	0	3	hypothetical protein	Hypo-rule applied	Bacteria;Proteobacteria;Betaproteobacteria;Burkholderiales;Oxalobacteraceae;Noviherbaspirillum;Noviherbaspirillum denitrificans;Noviherbaspirillum denitrificans TSA40	NA	NA	Ga0394449_02985	k141_3026	Noviherbaspirillum sp. BP10	2831285802	MEGAHIT-QMFCE002AF.10.fa
Ga0394449_02985_169305_170513	483.54	-9.3615	2.10362	-4.45019	NA	NA	not_DE	NA	NA	NA	NA	NA	NA	NA	NA	NA	NA	stearoyl-CoA desaturase (delta-9 desaturase)	KO:K00507	Bacteria;Proteobacteria;Betaproteobacteria;Burkholderiales;Oxalobacteraceae;Noviherbaspirillum;Noviherbaspirillum autotrophicum;Noviherbaspirillum autotrophicum TSA66	EC:1.14.19.1	KO:K00507	Ga0394449_02985	k141_3026	Noviherbaspirillum sp. BP10	2831285802	MEGAHIT-QMFCE002AF.10.fa
Ga0394449_02985_170613_171950	671.622	-10.7177	2.22667	-4.8133	1.48459e-06	4.34297e-06	DE	NA	NA	NA	NA	NA	NA	NA	NA	NA	NA	small-conductance mechanosensitive channel	COG3264	Bacteria;Proteobacteria;Betaproteobacteria;Burkholderiales;Oxalobacteraceae;Noviherbaspirillum;Noviherbaspirillum autotrophicum;Noviherbaspirillum autotrophicum TSA66	NA	NA	Ga0394449_02985	k141_3026	Noviherbaspirillum sp. BP10	2831285802	MEGAHIT-QMFCE002AF.10.fa
Ga0394449_02985_171947_172510	14.1192	-9.32428	2.54007	-3.67087	0.000241723	0.000534958	DE	NA	NA	NA	NA	NA	NA	NA	NA	NA	NA	phosphatidylserine/phosphatidylglycerophosphate/cardiolipin synthase-like enzyme	COG1502	Bacteria;Proteobacteria;Betaproteobacteria;Burkholderiales;Oxalobacteraceae;Noviherbaspirillum;Noviherbaspirillum sp. Root189;Noviherbaspirillum sp. Root189	NA	NA	Ga0394449_02985	k141_3026	Noviherbaspirillum sp. BP10	2831285802	MEGAHIT-QMFCE002AF.10.fa
Ga0394449_02985_172507_173763	159.715	-10.8766	1.67675	-6.48672	8.77233e-11	4.09266e-10	DE	NA	NA	NA	NA	NA	NA	NA	NA	NA	NA	16S rRNA (cytosine967-C5)-methyltransferase	KO:K03500	Bacteria;Proteobacteria;Betaproteobacteria;Burkholderiales;Oxalobacteraceae;Noviherbaspirillum;Noviherbaspirillum sp. Root189;Noviherbaspirillum sp. Root189	EC:2.1.1.176	KO:K03500	Ga0394449_02985	k141_3026	Noviherbaspirillum sp. BP10	2831285802	MEGAHIT-QMFCE002AF.10.fa
Ga0394449_02985_173773_174411	207.952	-10.878	1.82073	-5.97457	2.30705e-09	9.28415e-09	DE	NA	NA	NA	NA	NA	NA	NA	NA	NA	NA	phosphoribosylglycinamide formyltransferase-1	KO:K11175	Bacteria;Proteobacteria;Betaproteobacteria;Burkholderiales;Oxalobacteraceae;Noviherbaspirillum;Noviherbaspirillum sp. Root189;Noviherbaspirillum sp. Root189	EC:2.1.2.2	KO:K11175	Ga0394449_02985	k141_3026	Noviherbaspirillum sp. BP10	2831285802	MEGAHIT-QMFCE002AF.10.fa
Ga0394449_02985_174491_174949	117.345	-7.96302	2.11906	-3.75781	0.000171409	0.000388972	DE	NA	NA	NA	NA	NA	NA	NA	NA	NA	NA	RNAse (barnase) inhibitor barstar	COG2732	Bacteria;Proteobacteria;Betaproteobacteria;Burkholderiales;Oxalobacteraceae;Noviherbaspirillum;Noviherbaspirillum sp. Root189;Noviherbaspirillum sp. Root189	NA	NA	Ga0394449_02985	k141_3026	Noviherbaspirillum sp. BP10	2831285802	MEGAHIT-QMFCE002AF.10.fa
Ga0394449_02985_174954_175328	623.099	-7.98248	1.4141	-5.64493	1.6525e-08	6.08143e-08	DE	NA	NA	NA	NA	NA	NA	NA	NA	NA	NA	ribonuclease T1	KO:K01167	Bacteria;Proteobacteria;Betaproteobacteria;Burkholderiales;Oxalobacteraceae;Noviherbaspirillum;Noviherbaspirillum autotrophicum;Noviherbaspirillum autotrophicum TSA66	EC:3.1.27.3	KO:K01167	Ga0394449_02985	k141_3026	Noviherbaspirillum sp. BP10	2831285802	MEGAHIT-QMFCE002AF.10.fa
Ga0394449_02985_175635_175985	125.727	-6.45866	1.65196	-3.9097	9.24093e-05	0.000218985	DE	NA	NA	NA	NA	NA	NA	NA	NA	NA	NA	hypothetical protein	Hypo-rule applied	Bacteria;Proteobacteria;Betaproteobacteria;Burkholderiales;Oxalobacteraceae;Noviherbaspirillum;Noviherbaspirillum autotrophicum;Noviherbaspirillum autotrophicum TSA66	NA	NA	Ga0394449_02985	k141_3026	Noviherbaspirillum sp. BP10	2831285802	MEGAHIT-QMFCE002AF.10.fa
Ga0394449_02985_176082_177296	164.286	-9.35173	2.24353	-4.16831	3.06861e-05	7.7659e-05	DE	NA	NA	NA	NA	NA	NA	NA	NA	NA	NA	NTE family protein	KO:K07001	Bacteria;Proteobacteria;Betaproteobacteria;Burkholderiales;Oxalobacteraceae;Noviherbaspirillum;Noviherbaspirillum denitrificans;Noviherbaspirillum denitrificans TSA40	NA	KO:K07001	Ga0394449_02985	k141_3026	Noviherbaspirillum sp. BP10	2831285802	MEGAHIT-QMFCE002AF.10.fa
Ga0394449_02985_17670_18506	63.3047	-7.72917	2.36419	-3.26926	0.00107829	0.00213221	DE	NA	NA	NA	NA	NA	NA	NA	NA	NA	NA	high-affinity iron transporter	KO:K07243	Bacteria;Proteobacteria;Betaproteobacteria;Nitrosomonadales;Thiobacillaceae;Thiobacillus;Thiobacillus thioparus;Thiobacillus thioparus DSM 505	NA	KO:K07243	Ga0394449_02985	k141_3026	Noviherbaspirillum sp. BP10	2831285802	MEGAHIT-QMFCE002AF.10.fa
Ga0394449_02985_177410_179104	196.469	-13.1884	2.37266	-5.55849	NA	NA	not_DE	NA	NA	NA	NA	NA	NA	NA	NA	NA	NA	gamma-glutamyltranspeptidase/glutathione hydrolase	KO:K00681	Bacteria;Proteobacteria;Betaproteobacteria;Burkholderiales;Oxalobacteraceae;Noviherbaspirillum;Noviherbaspirillum sp. Root189;Noviherbaspirillum sp. Root189	EC:2.3.2.2,EC:3.4.19.13	KO:K00681	Ga0394449_02985	k141_3026	Noviherbaspirillum sp. BP10	2831285802	MEGAHIT-QMFCE002AF.10.fa
Ga0394449_02985_179325_180083	55.4989	-11.2348	3.17303	-3.54071	0.000399048	0.000849762	DE	NA	24.5351	NA	NA	NA	NA	24.5351	NA	2	0	NAD(P)-dependent dehydrogenase (short-subunit alcohol dehydrogenase family)	COG1028	Bacteria;Proteobacteria;Betaproteobacteria;Burkholderiales;Oxalobacteraceae;Noviherbaspirillum;Noviherbaspirillum autotrophicum;Noviherbaspirillum autotrophicum TSA66	NA	NA	Ga0394449_02985	k141_3026	Noviherbaspirillum sp. BP10	2831285802	MEGAHIT-QMFCE002AF.10.fa
Ga0394449_02985_182680_183336	312.682	-7.83548	2.21369	-3.53955	0.000400808	0.000853267	DE	NA	23.8376	NA	NA	NA	NA	NA	23.8376	0	3	adenylate kinase	KO:K00939	Bacteria;Proteobacteria;Betaproteobacteria;Burkholderiales;Oxalobacteraceae;Noviherbaspirillum;Noviherbaspirillum sp. Root189;Noviherbaspirillum sp. Root189	EC:2.7.4.3	KO:K00939	Ga0394449_02985	k141_3026	Noviherbaspirillum sp. BP10	2831285802	MEGAHIT-QMFCE002AF.10.fa
Ga0394449_02985_183476_184234	241.224	-9.73494	2.93585	-3.31589	0.000913531	0.00182437	DE	NA	NA	NA	NA	NA	NA	NA	NA	NA	NA	3-deoxy-manno-octulosonate cytidylyltransferase (CMP-KDO synthetase)	KO:K00979	Bacteria;Proteobacteria;Betaproteobacteria;Burkholderiales;Oxalobacteraceae;Noviherbaspirillum;Noviherbaspirillum denitrificans;Noviherbaspirillum denitrificans TSA40	EC:2.7.7.38	KO:K00979	Ga0394449_02985	k141_3026	Noviherbaspirillum sp. BP10	2831285802	MEGAHIT-QMFCE002AF.10.fa
Ga0394449_02985_184294_184488	8.95834	-8.54718	3.88239	-2.20153	0.0276988	0.0403525	DE	NA	NA	NA	NA	NA	NA	NA	NA	NA	NA	hypothetical protein	KO:K09791	Bacteria;Proteobacteria;Betaproteobacteria;Burkholderiales;Oxalobacteraceae;Noviherbaspirillum;Noviherbaspirillum autotrophicum;Noviherbaspirillum autotrophicum TSA66	NA	KO:K09791	Ga0394449_02985	k141_3026	Noviherbaspirillum sp. BP10	2831285802	MEGAHIT-QMFCE002AF.10.fa
Ga0394449_02985_184469_185482	29.1349	-7.7385	2.68281	-2.88448	0.00392066	0.00716923	DE	NA	NA	NA	NA	NA	NA	NA	NA	NA	NA	tetraacyldisaccharide 4'-kinase	KO:K00912	Bacteria;Proteobacteria;Betaproteobacteria;Burkholderiales;Oxalobacteraceae;Noviherbaspirillum;Noviherbaspirillum sp. Root189;Noviherbaspirillum sp. Root189	EC:2.7.1.130	KO:K00912	Ga0394449_02985	k141_3026	Noviherbaspirillum sp. BP10	2831285802	MEGAHIT-QMFCE002AF.10.fa
Ga0394449_02985_18513_18839	102.48	-4.34393	2.52465	-1.7206	0.0853226	0.104709	not_DE	NA	25.5943	NA	NA	NA	NA	NA	25.5943	0	3	plastocyanin	COG3794	Bacteria;Proteobacteria;Gammaproteobacteria;Chromatiales;Halothiobacillaceae;Halothiobacillus;Halothiobacillus sp. LS2;Halothiobacillus sp. LS2	NA	NA	Ga0394449_02985	k141_3026	Noviherbaspirillum sp. BP10	2831285802	MEGAHIT-QMFCE002AF.10.fa
Ga0394449_02985_185479_185913	37.5642	-9.02521	1.89189	-4.77047	1.83799e-06	5.32051e-06	DE	NA	NA	NA	NA	NA	NA	NA	NA	0	0	biopolymer transport protein ExbD	KO:K03559	Bacteria;Proteobacteria;Betaproteobacteria;Burkholderiales;Oxalobacteraceae;Noviherbaspirillum;Noviherbaspirillum sp. Root189;Noviherbaspirillum sp. Root189	NA	KO:K03559	Ga0394449_02985	k141_3026	Noviherbaspirillum sp. BP10	2831285802	MEGAHIT-QMFCE002AF.10.fa
Ga0394449_02985_185923_186528	9.4734	-4.97896	3.74069	-1.33103	0.18318	0.20553	not_DE	NA	25.5545	NA	NA	NA	NA	25.5545	NA	2	0	biopolymer transport protein ExbB	KO:K03561	Bacteria;Proteobacteria;Betaproteobacteria;Burkholderiales;Oxalobacteraceae;Noviherbaspirillum;Noviherbaspirillum sp. Root189;Noviherbaspirillum sp. Root189	NA	KO:K03561	Ga0394449_02985	k141_3026	Noviherbaspirillum sp. BP10	2831285802	MEGAHIT-QMFCE002AF.10.fa
Ga0394449_02985_186565_186789	303.499	-7.28428	2.26482	-3.21627	0.00129869	0.0025389	DE	NA	NA	NA	NA	NA	NA	NA	NA	NA	NA	hypothetical protein	Hypo-rule applied	NA	NA	NA	Ga0394449_02985	k141_3026	Noviherbaspirillum sp. BP10	2831285802	MEGAHIT-QMFCE002AF.10.fa
Ga0394449_02985_186805_188205	232.179	-10.9831	2.02109	-5.43424	5.503e-08	1.90765e-07	DE	NA	NA	NA	NA	NA	NA	NA	NA	NA	NA	exodeoxyribonuclease VII large subunit	KO:K03601	Bacteria;Proteobacteria;Betaproteobacteria;Burkholderiales;Oxalobacteraceae;Noviherbaspirillum;Noviherbaspirillum denitrificans;Noviherbaspirillum denitrificans TSA40	EC:3.1.11.6	KO:K03601	Ga0394449_02985	k141_3026	Noviherbaspirillum sp. BP10	2831285802	MEGAHIT-QMFCE002AF.10.fa
Ga0394449_02985_188436_188981	373.78	-7.39158	1.77633	-4.16116	3.16634e-05	7.99967e-05	DE	NA	24.3563	NA	NA	NA	NA	NA	24.3563	0	3	Fe-Mn family superoxide dismutase	KO:K04564	Bacteria;Proteobacteria;Betaproteobacteria;Burkholderiales;Oxalobacteraceae;Noviherbaspirillum;Noviherbaspirillum sp. Root189;Noviherbaspirillum sp. Root189	EC:1.15.1.1	KO:K04564	Ga0394449_02985	k141_3026	Noviherbaspirillum sp. BP10	2831285802	MEGAHIT-QMFCE002AF.10.fa
Ga0394449_02985_189538_190347	1855.5	-11.5351	2.03506	-5.66821	1.44298e-08	5.34725e-08	DE	NA	NA	NA	NA	NA	NA	NA	NA	NA	NA	3-oxoadipate enol-lactonase	KO:K01055	Bacteria;Firmicutes;Bacilli;Bacillales;Bacillaceae;Anaerobacillus;Anaerobacillus macyae;Anaerobacillus macyae DSM 16346	EC:3.1.1.24	KO:K01055	Ga0394449_02985	k141_3026	Noviherbaspirillum sp. BP10	2831285802	MEGAHIT-QMFCE002AF.10.fa
Ga0394449_02985_190522_190884	219.033	-12.8313	1.71392	-7.48653	7.07178e-14	5.15422e-13	DE	NA	NA	NA	NA	NA	NA	NA	NA	NA	NA	hypothetical protein	Hypo-rule applied	Bacteria;Proteobacteria;Betaproteobacteria;Nitrosomonadales;Nitrosomonadaceae;Nitrosomonas;Nitrosomonas sp. Is79A3;Nitrosomonas sp. IS79A3	NA	NA	Ga0394449_02985	k141_3026	Noviherbaspirillum sp. BP10	2831285802	MEGAHIT-QMFCE002AF.10.fa
Ga0394449_02985_19069_19536	43.5881	-10.895	3.09883	-3.51583	0.000438377	0.000927036	DE	NA	NA	NA	NA	NA	NA	NA	NA	NA	NA	desulfoferrodoxin (superoxide reductase-like protein)	COG2033	Bacteria;Proteobacteria;Betaproteobacteria;Rhodocyclales;Rhodocyclaceae;Dechlorobacter;Dechlorobacter hydrogenophilus;Dechlorobacter hydrogenophilus LT-1	NA	NA	Ga0394449_02985	k141_3026	Noviherbaspirillum sp. BP10	2831285802	MEGAHIT-QMFCE002AF.10.fa
Ga0394449_02985_191068_192786	60.468	-11.6294	1.95681	-5.94306	2.7975e-09	1.11438e-08	DE	NA	24.3051	NA	NA	NA	NA	24.3051	NA	3	0	putative acyl-CoA dehydrogenase	KO:K09456	Bacteria;Proteobacteria;Betaproteobacteria;Burkholderiales;Oxalobacteraceae;Noviherbaspirillum;Noviherbaspirillum denitrificans;Noviherbaspirillum denitrificans TSA40	NA	KO:K09456	Ga0394449_02985	k141_3026	Noviherbaspirillum sp. BP10	2831285802	MEGAHIT-QMFCE002AF.10.fa
Ga0394449_02985_192953_193576	100.721	-12.2133	2.41957	-5.04772	4.47105e-07	1.3873e-06	DE	NA	NA	NA	NA	NA	NA	NA	NA	NA	NA	AcrR family transcriptional regulator	COG1309	Bacteria;Proteobacteria;Betaproteobacteria;Burkholderiales;Oxalobacteraceae;Noviherbaspirillum;Noviherbaspirillum denitrificans;Noviherbaspirillum denitrificans TSA40	NA	NA	Ga0394449_02985	k141_3026	Noviherbaspirillum sp. BP10	2831285802	MEGAHIT-QMFCE002AF.10.fa
Ga0394449_02985_193707_194909	384.803	-14.2896	1.95599	-7.30555	2.76134e-13	1.89078e-12	DE	NA	NA	NA	NA	NA	NA	NA	NA	NA	NA	acetyl-CoA C-acetyltransferase	KO:K00626	Bacteria;Proteobacteria;Betaproteobacteria;Burkholderiales;Oxalobacteraceae;Undibacterium;Undibacterium pigrum;Undibacterium pigrum DSM 19792	EC:2.3.1.9	KO:K00626	Ga0394449_02985	k141_3026	Noviherbaspirillum sp. BP10	2831285802	MEGAHIT-QMFCE002AF.10.fa
Ga0394449_02985_194922_197072	350.206	-14.1691	1.91866	-7.38489	1.52582e-13	1.07332e-12	DE	NA	27.1229	NA	NA	NA	NA	NA	27.1229	0	3	3-hydroxyacyl-CoA dehydrogenase/enoyl-CoA hydratase/3-hydroxybutyryl-CoA epimerase	KO:K01782	Bacteria;Proteobacteria;Betaproteobacteria;Burkholderiales;Oxalobacteraceae;Undibacterium;Undibacterium pigrum;Undibacterium pigrum DSM 19792	EC:1.1.1.35,EC:4.2.1.17,EC:5.1.2.3	KO:K01782	Ga0394449_02985	k141_3026	Noviherbaspirillum sp. BP10	2831285802	MEGAHIT-QMFCE002AF.10.fa
Ga0394449_02985_19602_20033	28.4165	-10.2504	3.35531	-3.05498	0.00225078	0.00424622	DE	NA	NA	NA	NA	NA	NA	NA	NA	NA	NA	hemoglobin	KO:K06886	Bacteria;Proteobacteria;Betaproteobacteria;Rhodocyclales;Zoogloeaceae;Azoarcus;Azoarcus sp. KH32C;Azoarcus sp. KH32C	NA	KO:K06886	Ga0394449_02985	k141_3026	Noviherbaspirillum sp. BP10	2831285802	MEGAHIT-QMFCE002AF.10.fa
Ga0394449_02985_198453_199340	121.207	-12.5106	2.30005	-5.43926	5.35012e-08	1.85725e-07	DE	NA	NA	NA	NA	NA	NA	NA	NA	NA	NA	drug/metabolite transporter (DMT)-like permease	COG0697	Bacteria;Proteobacteria;Betaproteobacteria;Burkholderiales;Oxalobacteraceae;Herminiimonas;Herminiimonas arsenitoxidans;Herminiimonas sp. AS8	NA	NA	Ga0394449_02985	k141_3026	Noviherbaspirillum sp. BP10	2831285802	MEGAHIT-QMFCE002AF.10.fa
Ga0394449_02985_199573_200712	94.9395	-9.4679	2.73441	-3.46251	0.000535164	0.00111435	DE	NA	NA	NA	NA	NA	NA	NA	NA	NA	NA	radical SAM protein with 4Fe4S-binding SPASM domain	TIGR04085	Bacteria;Proteobacteria;Betaproteobacteria;Burkholderiales;Oxalobacteraceae;Noviherbaspirillum;Noviherbaspirillum denitrificans;Noviherbaspirillum denitrificans TSA40	NA	NA	Ga0394449_02985	k141_3026	Noviherbaspirillum sp. BP10	2831285802	MEGAHIT-QMFCE002AF.10.fa
Ga0394449_02985_20063_20512	23.984	-10.0647	2.93097	-3.43391	0.00059495	0.00123078	DE	NA	NA	NA	NA	NA	NA	NA	NA	NA	NA	predicted kinase	COG4639	Bacteria;Proteobacteria;Betaproteobacteria;Burkholderiales;Oxalobacteraceae;Noviherbaspirillum;Noviherbaspirillum humi;Noviherbaspirillum humi U15	NA	NA	Ga0394449_02985	k141_3026	Noviherbaspirillum sp. BP10	2831285802	MEGAHIT-QMFCE002AF.10.fa
Ga0394449_02985_200731_201330	9.19062	-6.29564	2.58138	-2.43886	0.0147336	0.0236771	DE	NA	NA	NA	NA	NA	NA	NA	NA	NA	NA	AcrR family transcriptional regulator	COG1309	Bacteria;Proteobacteria;Betaproteobacteria;Burkholderiales;Oxalobacteraceae;Noviherbaspirillum;Noviherbaspirillum autotrophicum;Noviherbaspirillum autotrophicum TSA66	NA	NA	Ga0394449_02985	k141_3026	Noviherbaspirillum sp. BP10	2831285802	MEGAHIT-QMFCE002AF.10.fa
Ga0394449_02985_201518_202393	62.654	-11.61	2.13433	-5.43965	5.33848e-08	1.85364e-07	DE	NA	NA	NA	NA	NA	NA	NA	NA	NA	NA	uncharacterized protein (DUF849 family)	COG3246	Bacteria;Proteobacteria;Betaproteobacteria;Burkholderiales;Oxalobacteraceae;Noviherbaspirillum;Noviherbaspirillum autotrophicum;Noviherbaspirillum autotrophicum TSA66	NA	NA	Ga0394449_02985	k141_3026	Noviherbaspirillum sp. BP10	2831285802	MEGAHIT-QMFCE002AF.10.fa
Ga0394449_02985_202392_202589	61.4012	-26.5474	3.91091	-6.78804	NA	NA	not_DE	NA	NA	NA	NA	NA	NA	NA	NA	NA	NA	hypothetical protein	Hypo-rule applied	NA	NA	NA	Ga0394449_02985	k141_3026	Noviherbaspirillum sp. BP10	2831285802	MEGAHIT-QMFCE002AF.10.fa
Ga0394449_02985_202725_203492	115.899	-12.3062	3.10355	-3.9652	7.33341e-05	0.000176299	DE	NA	NA	NA	NA	NA	NA	NA	NA	NA	NA	enoyl-CoA hydratase/carnithine racemase	COG1024	Bacteria;Proteobacteria;Betaproteobacteria;Burkholderiales;Oxalobacteraceae;Noviherbaspirillum;Noviherbaspirillum massiliense;Noviherbaspirillum massiliense JC206	NA	NA	Ga0394449_02985	k141_3026	Noviherbaspirillum sp. BP10	2831285802	MEGAHIT-QMFCE002AF.10.fa
Ga0394449_02985_203513_204679	70.6524	-11.6744	2.54332	-4.5902	4.42814e-06	1.2269e-05	DE	NA	NA	NA	NA	NA	NA	NA	NA	NA	NA	acyl-CoA dehydrogenase	KO:K00249	Bacteria;Proteobacteria;Betaproteobacteria;Burkholderiales;Oxalobacteraceae;Noviherbaspirillum;Noviherbaspirillum autotrophicum;Noviherbaspirillum autotrophicum TSA66	EC:1.3.8.7	KO:K00249	Ga0394449_02985	k141_3026	Noviherbaspirillum sp. BP10	2831285802	MEGAHIT-QMFCE002AF.10.fa
Ga0394449_02985_204711_205583	32.8421	-10.6002	2.4158	-4.38786	1.14471e-05	3.03052e-05	DE	NA	NA	NA	NA	NA	NA	NA	NA	NA	NA	citronellol/citronellal dehydrogenase	KO:K13774	Bacteria;Proteobacteria;Betaproteobacteria;Burkholderiales;Oxalobacteraceae;Noviherbaspirillum;Noviherbaspirillum autotrophicum;Noviherbaspirillum autotrophicum TSA66	NA	KO:K13774	Ga0394449_02985	k141_3026	Noviherbaspirillum sp. BP10	2831285802	MEGAHIT-QMFCE002AF.10.fa
Ga0394449_02985_205583_207202	33.8997	-10.7187	2.16503	-4.95083	7.38963e-07	2.24335e-06	DE	NA	NA	NA	NA	NA	NA	NA	NA	NA	NA	geranyl-CoA carboxylase beta subunit	KO:K13778	Bacteria;Proteobacteria;Betaproteobacteria;Burkholderiales;Oxalobacteraceae;Noviherbaspirillum;Noviherbaspirillum autotrophicum;Noviherbaspirillum autotrophicum TSA66	EC:6.4.1.5	KO:K13778	Ga0394449_02985	k141_3026	Noviherbaspirillum sp. BP10	2831285802	MEGAHIT-QMFCE002AF.10.fa
Ga0394449_02985_20586_20786	37.2158	-10.6568	3.15369	-3.37915	0.000727105	0.00147977	DE	NA	NA	NA	NA	NA	NA	NA	NA	NA	NA	hypothetical protein	Hypo-rule applied	Bacteria;Proteobacteria;Betaproteobacteria;Burkholderiales;Oxalobacteraceae;Noviherbaspirillum;Noviherbaspirillum sp. Root189;Noviherbaspirillum sp. Root189	NA	NA	Ga0394449_02985	k141_3026	Noviherbaspirillum sp. BP10	2831285802	MEGAHIT-QMFCE002AF.10.fa
Ga0394449_02985_207142_208389	213.235	-13.4495	1.92859	-6.97375	3.08597e-12	1.81227e-11	DE	NA	NA	NA	NA	NA	NA	NA	NA	NA	NA	citronellyl-CoA dehydrogenase	KO:K11731	Bacteria;Proteobacteria;Betaproteobacteria;Burkholderiales;Oxalobacteraceae;Noviherbaspirillum;Noviherbaspirillum massiliense;Noviherbaspirillum massiliense JC206	EC:1.3.99.-	KO:K11731	Ga0394449_02985	k141_3026	Noviherbaspirillum sp. BP10	2831285802	MEGAHIT-QMFCE002AF.10.fa
Ga0394449_02985_20805_21011	109.379	-12.3046	2.54914	-4.82697	NA	NA	not_DE	NA	NA	NA	NA	NA	NA	NA	NA	NA	NA	pyruvate-formate lyase	COG1882	NA	NA	NA	Ga0394449_02985	k141_3026	Noviherbaspirillum sp. BP10	2831285802	MEGAHIT-QMFCE002AF.10.fa
Ga0394449_02985_208428_210422	244.885	-13.6576	1.90764	-7.15942	8.10165e-13	5.24448e-12	DE	NA	NA	NA	NA	NA	NA	NA	NA	NA	NA	geranyl-CoA carboxylase alpha subunit	KO:K13777	Bacteria;Proteobacteria;Betaproteobacteria;Burkholderiales;Oxalobacteraceae;Noviherbaspirillum;Noviherbaspirillum autotrophicum;Noviherbaspirillum autotrophicum TSA66	EC:6.4.1.5	KO:K13777	Ga0394449_02985	k141_3026	Noviherbaspirillum sp. BP10	2831285802	MEGAHIT-QMFCE002AF.10.fa
Ga0394449_02985_21019_21198	15.7575	-9.3801	3.36982	-2.78356	0.00537654	0.00964831	DE	NA	NA	NA	NA	NA	NA	NA	NA	NA	NA	hypothetical protein	Hypo-rule applied	NA	NA	NA	Ga0394449_02985	k141_3026	Noviherbaspirillum sp. BP10	2831285802	MEGAHIT-QMFCE002AF.10.fa
Ga0394449_02985_210451_212124	142.921	-12.8919	1.88502	-6.83913	7.9678e-12	4.38434e-11	DE	NA	NA	NA	NA	NA	NA	NA	NA	NA	NA	long-chain acyl-CoA synthetase	KO:K01897	Bacteria;Proteobacteria;Betaproteobacteria;Burkholderiales;Oxalobacteraceae;Noviherbaspirillum;Noviherbaspirillum massiliense;Noviherbaspirillum massiliense JC206	EC:6.2.1.3	KO:K01897	Ga0394449_02985	k141_3026	Noviherbaspirillum sp. BP10	2831285802	MEGAHIT-QMFCE002AF.10.fa
Ga0394449_02985_212419_212874	96.2581	-12.1136	2.56921	-4.71491	2.41823e-06	6.90512e-06	DE	NA	NA	NA	NA	NA	NA	NA	NA	NA	NA	uncharacterized membrane protein	COG5488	Bacteria;Proteobacteria;Betaproteobacteria;Burkholderiales;Oxalobacteraceae;Noviherbaspirillum;Noviherbaspirillum autotrophicum;Noviherbaspirillum autotrophicum TSA66	NA	NA	Ga0394449_02985	k141_3026	Noviherbaspirillum sp. BP10	2831285802	MEGAHIT-QMFCE002AF.10.fa
Ga0394449_02985_21248_22648	58.4729	-11.3372	2.96605	-3.82232	0.000132201	0.000305239	DE	NA	NA	NA	NA	NA	NA	NA	NA	NA	NA	two-component system sensor histidine kinase TctE	KO:K07649	Bacteria;Proteobacteria;Betaproteobacteria;Burkholderiales;Oxalobacteraceae;Noviherbaspirillum;Noviherbaspirillum denitrificans;Noviherbaspirillum denitrificans TSA40	EC:2.7.13.3	KO:K07649	Ga0394449_02985	k141_3026	Noviherbaspirillum sp. BP10	2831285802	MEGAHIT-QMFCE002AF.10.fa
Ga0394449_02985_212937_213530	77.8671	-11.7197	3.19057	-3.67323	0.0002395	0.000530745	DE	NA	NA	NA	NA	NA	NA	NA	NA	NA	NA	Co/Zn/Cd efflux system component	COG1230	Bacteria;Proteobacteria;Betaproteobacteria;Burkholderiales;Oxalobacteraceae;Noviherbaspirillum;Noviherbaspirillum massiliense;Noviherbaspirillum massiliense JC206	NA	NA	Ga0394449_02985	k141_3026	Noviherbaspirillum sp. BP10	2831285802	MEGAHIT-QMFCE002AF.10.fa
Ga0394449_02985_213786_214664	180.416	-12.8378	1.85496	-6.92078	4.49176e-12	2.5361e-11	DE	NA	NA	NA	NA	NA	NA	NA	NA	NA	NA	glyoxylase-like metal-dependent hydrolase (beta-lactamase superfamily II)	COG0491	Bacteria;Proteobacteria;Betaproteobacteria;Burkholderiales;Oxalobacteraceae;Noviherbaspirillum;Noviherbaspirillum autotrophicum;Noviherbaspirillum autotrophicum TSA66	NA	NA	Ga0394449_02985	k141_3026	Noviherbaspirillum sp. BP10	2831285802	MEGAHIT-QMFCE002AF.10.fa
Ga0394449_02985_214724_215044	66.9759	-11.7198	2.06702	-5.6699	1.42885e-08	5.30016e-08	DE	NA	NA	NA	NA	NA	NA	NA	NA	NA	NA	ArsR family transcriptional regulator	KO:K03892	Bacteria;Proteobacteria;Betaproteobacteria;Burkholderiales;Oxalobacteraceae;Noviherbaspirillum;Noviherbaspirillum denitrificans;Noviherbaspirillum denitrificans TSA40	NA	KO:K03892	Ga0394449_02985	k141_3026	Noviherbaspirillum sp. BP10	2831285802	MEGAHIT-QMFCE002AF.10.fa
Ga0394449_02985_215494_215943	3.73956	-7.37779	3.48644	-2.11614	0.0343331	0.0485494	DE	NA	NA	NA	NA	NA	NA	NA	NA	NA	NA	hypothetical protein	KO:K07112	Bacteria;Proteobacteria;Betaproteobacteria;Burkholderiales;Oxalobacteraceae;Noviherbaspirillum;Noviherbaspirillum denitrificans;Noviherbaspirillum denitrificans TSA40	NA	KO:K07112	Ga0394449_02985	k141_3026	Noviherbaspirillum sp. BP10	2831285802	MEGAHIT-QMFCE002AF.10.fa
Ga0394449_02985_215950_218298	355.316	-12.1728	2.05069	-5.93594	NA	NA	not_DE	NA	NA	NA	NA	NA	NA	NA	NA	NA	NA	PAS domain S-box-containing protein	TIGR00229	Bacteria;Proteobacteria;Betaproteobacteria;Burkholderiales;Oxalobacteraceae;Noviherbaspirillum;Noviherbaspirillum autotrophicum;Noviherbaspirillum autotrophicum TSA66	NA	NA	Ga0394449_02985	k141_3026	Noviherbaspirillum sp. BP10	2831285802	MEGAHIT-QMFCE002AF.10.fa
Ga0394449_02985_218362_218571	35.8679	-10.6037	3.13734	-3.37985	0.000725256	0.00147662	DE	NA	NA	NA	NA	NA	NA	NA	NA	NA	NA	hypothetical protein	Hypo-rule applied	NA	NA	NA	Ga0394449_02985	k141_3026	Noviherbaspirillum sp. BP10	2831285802	MEGAHIT-QMFCE002AF.10.fa
Ga0394449_02985_218568_222128	222.321	-10.0144	1.642	-6.09891	1.06797e-09	4.45506e-09	DE	NA	NA	NA	NA	NA	NA	NA	NA	NA	NA	pyruvate carboxylase	KO:K01958	Bacteria;Proteobacteria;Betaproteobacteria;Burkholderiales;Oxalobacteraceae;Noviherbaspirillum;Noviherbaspirillum autotrophicum;Noviherbaspirillum autotrophicum TSA66	EC:6.4.1.1	KO:K01958	Ga0394449_02985	k141_3026	Noviherbaspirillum sp. BP10	2831285802	MEGAHIT-QMFCE002AF.10.fa
Ga0394449_02985_222203_222697	19.9074	-9.70035	3.86671	-2.50868	0.0121183	0.0199441	DE	NA	NA	NA	NA	NA	NA	NA	NA	NA	NA	outer membrane lipoprotein SlyB	COG3133	Bacteria;Proteobacteria;Betaproteobacteria;Burkholderiales;Oxalobacteraceae;Noviherbaspirillum;Noviherbaspirillum sp. Root189;Noviherbaspirillum sp. Root189	NA	NA	Ga0394449_02985	k141_3026	Noviherbaspirillum sp. BP10	2831285802	MEGAHIT-QMFCE002AF.10.fa
Ga0394449_02985_222820_225093	192.728	-11.2897	2.06301	-5.47243	4.43904e-08	1.55543e-07	DE	NA	NA	NA	NA	NA	NA	NA	NA	NA	NA	adenylate cyclase	KO:K01768	Bacteria;Proteobacteria;Betaproteobacteria;Burkholderiales;Oxalobacteraceae;Noviherbaspirillum;Noviherbaspirillum denitrificans;Noviherbaspirillum denitrificans TSA40	EC:4.6.1.1	KO:K01768	Ga0394449_02985	k141_3026	Noviherbaspirillum sp. BP10	2831285802	MEGAHIT-QMFCE002AF.10.fa
Ga0394449_02985_225103_226734	441.732	-11.5272	1.86046	-6.19591	5.79482e-10	2.48321e-09	DE	NA	NA	NA	NA	NA	NA	NA	NA	NA	NA	HD-GYP domain-containing protein (c-di-GMP phosphodiesterase class II)	COG2206	Bacteria;Proteobacteria;Betaproteobacteria;Burkholderiales;Oxalobacteraceae;Noviherbaspirillum;Noviherbaspirillum denitrificans;Noviherbaspirillum denitrificans TSA40	NA	NA	Ga0394449_02985	k141_3026	Noviherbaspirillum sp. BP10	2831285802	MEGAHIT-QMFCE002AF.10.fa
Ga0394449_02985_22648_23313	59.7223	-27.5362	3.91104	-7.04063	1.9137e-12	1.16984e-11	DE	NA	NA	NA	NA	NA	NA	NA	NA	NA	NA	two-component system response regulator TctD	KO:K07774	Bacteria;Proteobacteria;Betaproteobacteria;Burkholderiales;Oxalobacteraceae;Noviherbaspirillum;Noviherbaspirillum massiliense;Noviherbaspirillum massiliense JC206	NA	KO:K07774	Ga0394449_02985	k141_3026	Noviherbaspirillum sp. BP10	2831285802	MEGAHIT-QMFCE002AF.10.fa
Ga0394449_02985_226823_227590	138.317	-9.12001	1.9176	-4.75594	1.97524e-06	5.70015e-06	DE	NA	NA	NA	NA	NA	NA	NA	NA	NA	NA	3',5'-cyclic-nucleotide phosphodiesterase	KO:K01120	Bacteria;Proteobacteria;Betaproteobacteria;Burkholderiales;Oxalobacteraceae;Noviherbaspirillum;Noviherbaspirillum sp. Root189;Noviherbaspirillum sp. Root189	EC:3.1.4.17	KO:K01120	Ga0394449_02985	k141_3026	Noviherbaspirillum sp. BP10	2831285802	MEGAHIT-QMFCE002AF.10.fa
Ga0394449_02985_227915_230308	339.996	-10.0644	2.07444	-4.8516	1.22471e-06	3.61675e-06	DE	NA	NA	NA	NA	NA	NA	NA	NA	NA	NA	type II secretory ATPase GspE/PulE/Tfp pilus assembly ATPase PilB-like protein	COG2804	Bacteria;Proteobacteria;Betaproteobacteria;Burkholderiales;Oxalobacteraceae;Noviherbaspirillum;Noviherbaspirillum autotrophicum;Noviherbaspirillum autotrophicum TSA66	NA	NA	Ga0394449_02985	k141_3026	Noviherbaspirillum sp. BP10	2831285802	MEGAHIT-QMFCE002AF.10.fa
Ga0394449_02985_230315_230845	9.40246	-8.70634	3.04241	-2.86166	0.00421431	0.00767145	DE	NA	NA	NA	NA	NA	NA	NA	NA	NA	NA	CRP-like cAMP-binding protein	COG0664	Bacteria;Proteobacteria;Betaproteobacteria;Burkholderiales;Oxalobacteraceae;Undibacterium;Undibacterium pigrum;Undibacterium pigrum DSM 19792	NA	NA	Ga0394449_02985	k141_3026	Noviherbaspirillum sp. BP10	2831285802	MEGAHIT-QMFCE002AF.10.fa
Ga0394449_02985_231026_231865	175.419	-12.9078	3.06337	-4.21358	2.5136e-05	6.42336e-05	DE	NA	NA	NA	NA	NA	NA	NA	NA	NA	NA	hypothetical protein	Hypo-rule applied	Bacteria;Proteobacteria;Betaproteobacteria;Burkholderiales;Oxalobacteraceae;Noviherbaspirillum;Noviherbaspirillum denitrificans;Noviherbaspirillum denitrificans TSA40	NA	NA	Ga0394449_02985	k141_3026	Noviherbaspirillum sp. BP10	2831285802	MEGAHIT-QMFCE002AF.10.fa
Ga0394449_02985_232011_238583	651.023	-10.7911	2.18173	-4.94613	7.57021e-07	2.29364e-06	DE	NA	25.1434	NA	NA	NA	NA	25.1434	NA	3	0	filamentous hemagglutinin family protein	TIGR01901	Bacteria;Proteobacteria;Betaproteobacteria;Burkholderiales;Oxalobacteraceae;Undibacterium;Undibacterium pigrum;Undibacterium pigrum DSM 19792	NA	NA	Ga0394449_02985	k141_3026	Noviherbaspirillum sp. BP10	2831285802	MEGAHIT-QMFCE002AF.10.fa
Ga0394449_02985_23351_23590	6.16577	-7.96997	3.89624	-2.04556	0.0408	0.0560085	not_DE	NA	NA	NA	NA	NA	NA	NA	NA	NA	NA	hypothetical protein	Hypo-rule applied	NA	NA	NA	Ga0394449_02985	k141_3026	Noviherbaspirillum sp. BP10	2831285802	MEGAHIT-QMFCE002AF.10.fa
Ga0394449_02985_23587_23823	3.98149	-7.37398	3.91742	-1.88236	0.0597875	0.077499	not_DE	NA	NA	NA	NA	NA	NA	NA	NA	NA	NA	hypothetical protein	Hypo-rule applied	NA	NA	NA	Ga0394449_02985	k141_3026	Noviherbaspirillum sp. BP10	2831285802	MEGAHIT-QMFCE002AF.10.fa
Ga0394449_02985_23812_24000	52.6078	-11.183	2.97619	-3.75748	0.000171636	0.000389428	DE	NA	NA	NA	NA	NA	NA	NA	NA	NA	NA	uncharacterized protein (UPF0147 family)	COG1698	Bacteria;Proteobacteria;Betaproteobacteria;Burkholderiales;Oxalobacteraceae;Noviherbaspirillum;Noviherbaspirillum sp. Root189;Noviherbaspirillum sp. Root189	NA	NA	Ga0394449_02985	k141_3026	Noviherbaspirillum sp. BP10	2831285802	MEGAHIT-QMFCE002AF.10.fa
Ga0394449_02985_238595_240169	111.258	-10.6721	2.11356	-5.04935	4.43322e-07	1.37671e-06	DE	NA	NA	NA	NA	NA	NA	NA	NA	NA	NA	hemolysin activation/secretion protein	COG2831	Bacteria;Proteobacteria;Betaproteobacteria;Burkholderiales;Oxalobacteraceae;Noviherbaspirillum;Noviherbaspirillum denitrificans;Noviherbaspirillum denitrificans TSA40	NA	NA	Ga0394449_02985	k141_3026	Noviherbaspirillum sp. BP10	2831285802	MEGAHIT-QMFCE002AF.10.fa
Ga0394449_02985_240258_240539	1.99074	-6.41483	3.96801	-1.61664	0.105957	0.125734	not_DE	NA	NA	NA	NA	NA	NA	NA	NA	NA	NA	hypothetical protein	Hypo-rule applied	NA	NA	NA	Ga0394449_02985	k141_3026	Noviherbaspirillum sp. BP10	2831285802	MEGAHIT-QMFCE002AF.10.fa
Ga0394449_02985_240536_243640	377.765	-14.273	1.93368	-7.38123	1.56834e-13	1.10167e-12	DE	NA	NA	NA	NA	NA	NA	NA	NA	NA	NA	diguanylate cyclase (GGDEF)-like protein/PAS domain S-box-containing protein	TIGR00254/TIGR00229	Bacteria;Proteobacteria;Betaproteobacteria;Burkholderiales;Oxalobacteraceae;Noviherbaspirillum;Noviherbaspirillum massiliense;Noviherbaspirillum massiliense JC206	NA	NA	Ga0394449_02985	k141_3026	Noviherbaspirillum sp. BP10	2831285802	MEGAHIT-QMFCE002AF.10.fa
Ga0394449_02985_24075_24332	34.8596	-10.6001	2.93948	-3.60611	0.000310823	0.000675077	DE	NA	NA	NA	NA	NA	NA	NA	NA	NA	NA	hypothetical protein	Hypo-rule applied	NA	NA	NA	Ga0394449_02985	k141_3026	Noviherbaspirillum sp. BP10	2831285802	MEGAHIT-QMFCE002AF.10.fa
Ga0394449_02985_243660_244256	122.702	-12.6624	1.91217	-6.622	3.54374e-11	1.78731e-10	DE	NA	NA	NA	NA	NA	NA	NA	NA	NA	NA	predicted O-methyltransferase YrrM	COG4122	Bacteria;Proteobacteria;Betaproteobacteria;Burkholderiales;Oxalobacteraceae;Noviherbaspirillum;Noviherbaspirillum autotrophicum;Noviherbaspirillum autotrophicum TSA66	NA	NA	Ga0394449_02985	k141_3026	Noviherbaspirillum sp. BP10	2831285802	MEGAHIT-QMFCE002AF.10.fa
Ga0394449_02985_244347_245102	154.085	-12.9432	2.02959	-6.37728	1.8026e-10	8.15759e-10	DE	NA	NA	NA	NA	NA	NA	NA	NA	NA	NA	hypothetical protein	KO:K09122	Bacteria;Proteobacteria;Betaproteobacteria;Burkholderiales;Oxalobacteraceae;Noviherbaspirillum;Noviherbaspirillum sp. Root189;Noviherbaspirillum sp. Root189	NA	KO:K09122	Ga0394449_02985	k141_3026	Noviherbaspirillum sp. BP10	2831285802	MEGAHIT-QMFCE002AF.10.fa
Ga0394449_02985_24509_25189	17.6549	-9.60624	3.01424	-3.18695	0.00143781	0.00278607	DE	NA	NA	NA	NA	NA	NA	NA	NA	NA	NA	putative phosphoribosyl transferase	KO:K07100	Bacteria;Proteobacteria;Betaproteobacteria;Burkholderiales;Oxalobacteraceae;Noviherbaspirillum;Noviherbaspirillum autotrophicum;Noviherbaspirillum autotrophicum TSA66	NA	KO:K07100	Ga0394449_02985	k141_3026	Noviherbaspirillum sp. BP10	2831285802	MEGAHIT-QMFCE002AF.10.fa
Ga0394449_02985_245120_245509	115.359	-12.5045	2.07364	-6.0302	1.63757e-09	6.69096e-09	DE	NA	NA	NA	NA	NA	NA	NA	NA	NA	NA	hypothetical protein	Hypo-rule applied	NA	NA	NA	Ga0394449_02985	k141_3026	Noviherbaspirillum sp. BP10	2831285802	MEGAHIT-QMFCE002AF.10.fa
Ga0394449_02985_245678_246553	20.9115	-9.85063	3.00332	-3.27991	0.00103839	0.00205777	DE	NA	NA	NA	NA	NA	NA	NA	NA	NA	NA	nucleotide-binding universal stress UspA family protein	COG0589	Bacteria;Proteobacteria;Betaproteobacteria;Burkholderiales;Oxalobacteraceae;Noviherbaspirillum;Noviherbaspirillum autotrophicum;Noviherbaspirillum autotrophicum TSA66	NA	NA	Ga0394449_02985	k141_3026	Noviherbaspirillum sp. BP10	2831285802	MEGAHIT-QMFCE002AF.10.fa
Ga0394449_02985_246674_248068	99.8422	-12.2029	2.40611	-5.07165	3.94374e-07	1.23239e-06	DE	NA	NA	NA	NA	NA	NA	NA	NA	NA	NA	cytochrome d ubiquinol oxidase subunit I	KO:K00425	Bacteria;Proteobacteria;Betaproteobacteria;Burkholderiales;Oxalobacteraceae;Noviherbaspirillum;Noviherbaspirillum sp. Root189;Noviherbaspirillum sp. Root189	EC:1.10.3.-	KO:K00425	Ga0394449_02985	k141_3026	Noviherbaspirillum sp. BP10	2831285802	MEGAHIT-QMFCE002AF.10.fa
Ga0394449_02985_248065_249078	113.472	-28.4119	3.90902	-7.26831	NA	NA	not_DE	NA	NA	NA	NA	NA	NA	NA	NA	NA	NA	cytochrome d ubiquinol oxidase subunit II	KO:K00426	Bacteria;Proteobacteria;Betaproteobacteria;Burkholderiales;Oxalobacteraceae;Noviherbaspirillum;Noviherbaspirillum denitrificans;Noviherbaspirillum denitrificans TSA40	EC:1.10.3.-	KO:K00426	Ga0394449_02985	k141_3026	Noviherbaspirillum sp. BP10	2831285802	MEGAHIT-QMFCE002AF.10.fa
Ga0394449_02985_249148_250887	303.166	-6.82581	1.45893	-4.67863	2.88804e-06	8.18251e-06	DE	NA	NA	NA	NA	NA	NA	NA	NA	NA	NA	methyl-accepting chemotaxis protein-1 (serine sensor receptor)	KO:K05874	Bacteria;Proteobacteria;Betaproteobacteria;Burkholderiales;Oxalobacteraceae;Noviherbaspirillum;Noviherbaspirillum autotrophicum;Noviherbaspirillum autotrophicum TSA66	NA	KO:K05874	Ga0394449_02985	k141_3026	Noviherbaspirillum sp. BP10	2831285802	MEGAHIT-QMFCE002AF.10.fa
Ga0394449_02985_251520_251852	922.3	-9.21522	2.37629	-3.87798	0.000105327	0.000247164	DE	NA	25.7647	NA	NA	NA	NA	25.7647	NA	3	0	plasmid maintenance system antidote protein VapI	COG3093	Bacteria;Proteobacteria;Betaproteobacteria;Burkholderiales;Oxalobacteraceae;Noviherbaspirillum;Noviherbaspirillum denitrificans;Noviherbaspirillum denitrificans TSA40	NA	NA	Ga0394449_02985	k141_3026	Noviherbaspirillum sp. BP10	2831285802	MEGAHIT-QMFCE002AF.10.fa
Ga0394449_02985_25173_25997	37.1467	-10.9226	1.95853	-5.57696	2.44754e-08	8.81609e-08	DE	NA	NA	NA	NA	NA	NA	NA	NA	NA	NA	putative phosphoribosyl transferase	KO:K07100	Bacteria;Proteobacteria;Betaproteobacteria;Burkholderiales;Oxalobacteraceae;Noviherbaspirillum;Noviherbaspirillum autotrophicum;Noviherbaspirillum autotrophicum TSA66	NA	KO:K07100	Ga0394449_02985	k141_3026	Noviherbaspirillum sp. BP10	2831285802	MEGAHIT-QMFCE002AF.10.fa
Ga0394449_02985_252365_252565	266.298	-9.7856	1.91697	-5.10473	3.31268e-07	1.04591e-06	DE	NA	25.7262	NA	NA	NA	NA	25.7262	NA	3	0	uncharacterized protein YjbJ (UPF0337 family)	COG3237	Bacteria;Proteobacteria;Betaproteobacteria;Burkholderiales;Oxalobacteraceae;Noviherbaspirillum;Noviherbaspirillum denitrificans;Noviherbaspirillum denitrificans TSA40	NA	NA	Ga0394449_02985	k141_3026	Noviherbaspirillum sp. BP10	2831285802	MEGAHIT-QMFCE002AF.10.fa
Ga0394449_02985_252759_253022	1953.78	-11.1668	1.59816	-6.98732	2.80195e-12	1.65132e-11	DE	NA	NA	NA	NA	NA	NA	NA	NA	NA	NA	hypothetical protein	Hypo-rule applied	Bacteria;Proteobacteria;Betaproteobacteria;Burkholderiales;Oxalobacteraceae;Noviherbaspirillum;Noviherbaspirillum autotrophicum;Noviherbaspirillum autotrophicum TSA66	NA	NA	Ga0394449_02985	k141_3026	Noviherbaspirillum sp. BP10	2831285802	MEGAHIT-QMFCE002AF.10.fa
Ga0394449_02985_253272_253541	1273.81	-16.0553	1.8666	-8.60134	7.87875e-18	1.00137e-16	DE	NA	NA	NA	NA	NA	NA	NA	NA	NA	NA	uncharacterized membrane protein YeaQ/YmgE (transglycosylase-associated protein family)	COG2261	Bacteria;Proteobacteria;Betaproteobacteria;Burkholderiales;Oxalobacteraceae;Noviherbaspirillum;Noviherbaspirillum autotrophicum;Noviherbaspirillum autotrophicum TSA66	NA	NA	Ga0394449_02985	k141_3026	Noviherbaspirillum sp. BP10	2831285802	MEGAHIT-QMFCE002AF.10.fa
Ga0394449_02985_253564_253725	139.525	-12.6855	2.41986	-5.24223	1.58645e-07	5.21391e-07	DE	NA	NA	NA	NA	NA	NA	NA	NA	NA	NA	hypothetical protein	Hypo-rule applied	NA	NA	NA	Ga0394449_02985	k141_3026	Noviherbaspirillum sp. BP10	2831285802	MEGAHIT-QMFCE002AF.10.fa
Ga0394449_02985_253763_254068	6.20898	-8.16117	2.54135	-3.21135	0.00132114	0.00257829	DE	NA	NA	NA	NA	NA	NA	NA	NA	NA	NA	hypothetical protein	KO:K09780	Bacteria;Proteobacteria;Betaproteobacteria;Burkholderiales;Oxalobacteraceae;Massilia;Massilia sp. PDC64;Massilia sp. PDC64	NA	KO:K09780	Ga0394449_02985	k141_3026	Noviherbaspirillum sp. BP10	2831285802	MEGAHIT-QMFCE002AF.10.fa
Ga0394449_02985_254112_254330	106.231	-12.4724	1.86964	-6.67102	2.54036e-11	1.31318e-10	DE	NA	NA	NA	NA	NA	NA	NA	NA	NA	NA	hypothetical protein	Hypo-rule applied	Bacteria;Proteobacteria;Betaproteobacteria;Burkholderiales;Oxalobacteraceae;Noviherbaspirillum;Noviherbaspirillum autotrophicum;Noviherbaspirillum autotrophicum TSA66	NA	NA	Ga0394449_02985	k141_3026	Noviherbaspirillum sp. BP10	2831285802	MEGAHIT-QMFCE002AF.10.fa
Ga0394449_02985_254528_254920	12.7425	-8.01565	2.12398	-3.77388	0.000160728	0.000366347	DE	NA	NA	NA	NA	NA	NA	NA	NA	NA	NA	hypothetical protein	Hypo-rule applied	Bacteria;Bacteroidetes;Cytophagia;Cytophagales;Cytophagaceae;Rudanella;Rudanella lutea;Rudanella lutea DSM 19387	NA	NA	Ga0394449_02985	k141_3026	Noviherbaspirillum sp. BP10	2831285802	MEGAHIT-QMFCE002AF.10.fa
Ga0394449_02985_254917_256215	171.355	-13.0035	2.31959	-5.60598	2.07086e-08	7.51365e-08	DE	NA	NA	NA	NA	NA	NA	NA	NA	NA	NA	NADH dehydrogenase	KO:K03885	Bacteria;Proteobacteria;Betaproteobacteria;Burkholderiales;Oxalobacteraceae;Noviherbaspirillum;Noviherbaspirillum denitrificans;Noviherbaspirillum denitrificans TSA40	EC:1.6.99.3	KO:K03885	Ga0394449_02985	k141_3026	Noviherbaspirillum sp. BP10	2831285802	MEGAHIT-QMFCE002AF.10.fa
Ga0394449_02985_256389_257183	104.078	-9.09235	1.47104	-6.18089	6.37399e-10	2.72047e-09	DE	NA	NA	NA	NA	NA	NA	NA	NA	NA	NA	beta-phosphoglucomutase-like phosphatase (HAD superfamily)	COG0637	Bacteria;Proteobacteria;Betaproteobacteria;Burkholderiales;Oxalobacteraceae;Noviherbaspirillum;Noviherbaspirillum autotrophicum;Noviherbaspirillum autotrophicum TSA66	NA	NA	Ga0394449_02985	k141_3026	Noviherbaspirillum sp. BP10	2831285802	MEGAHIT-QMFCE002AF.10.fa
Ga0394449_02985_257320_258282	128.352	-9.81915	2.02349	-4.85258	1.21866e-06	3.60101e-06	DE	NA	NA	NA	NA	NA	NA	NA	NA	NA	NA	DNA-binding transcriptional LysR family regulator	COG0583	Bacteria;Proteobacteria;Betaproteobacteria;Burkholderiales;Oxalobacteraceae;Noviherbaspirillum;Noviherbaspirillum autotrophicum;Noviherbaspirillum autotrophicum TSA66	NA	NA	Ga0394449_02985	k141_3026	Noviherbaspirillum sp. BP10	2831285802	MEGAHIT-QMFCE002AF.10.fa
Ga0394449_02985_258303_259739	115.867	-11.437	1.71075	-6.68538	2.30325e-11	1.20058e-10	DE	NA	NA	NA	NA	NA	NA	NA	NA	NA	NA	signal transduction histidine kinase	COG0642	Bacteria;Proteobacteria;Betaproteobacteria;Burkholderiales;Oxalobacteraceae;Noviherbaspirillum;Noviherbaspirillum autotrophicum;Noviherbaspirillum autotrophicum TSA66	NA	NA	Ga0394449_02985	k141_3026	Noviherbaspirillum sp. BP10	2831285802	MEGAHIT-QMFCE002AF.10.fa
Ga0394449_02985_259736_260413	71.0887	-11.8141	2.07786	-5.6857	1.30278e-08	4.86272e-08	DE	NA	NA	NA	NA	NA	NA	NA	NA	NA	NA	DNA-binding response OmpR family regulator	COG0745	Bacteria;Proteobacteria;Betaproteobacteria;Burkholderiales;Oxalobacteraceae;Noviherbaspirillum;Noviherbaspirillum autotrophicum;Noviherbaspirillum autotrophicum TSA66	NA	NA	Ga0394449_02985	k141_3026	Noviherbaspirillum sp. BP10	2831285802	MEGAHIT-QMFCE002AF.10.fa
Ga0394449_02985_26001_26603	194.097	-29.1549	3.90808	-7.46014	NA	NA	not_DE	NA	NA	NA	NA	NA	NA	NA	NA	NA	NA	predicted transglutaminase-like cysteine proteinase	COG3672	Bacteria;Proteobacteria;Alphaproteobacteria;Rhodobacterales;Rhodobacteraceae;Salipiger;Salipiger profundus;Salipiger profundus JLT2016	NA	NA	Ga0394449_02985	k141_3026	Noviherbaspirillum sp. BP10	2831285802	MEGAHIT-QMFCE002AF.10.fa
Ga0394449_02985_260420_260725	1.5627	-4.09696	3.9575	-1.03524	0.300558	0.330039	not_DE	NA	NA	NA	NA	NA	NA	NA	NA	NA	NA	uncharacterized membrane protein AbrB (regulator of aidB expression)	COG3180	NA	NA	NA	Ga0394449_02985	k141_3026	Noviherbaspirillum sp. BP10	2831285802	MEGAHIT-QMFCE002AF.10.fa
Ga0394449_02985_260727_261662	44.7537	-11.072	2.28306	-4.84964	1.23687e-06	3.64976e-06	DE	NA	NA	NA	NA	NA	NA	NA	NA	NA	NA	CubicO group peptidase (beta-lactamase class C family)	COG1680	Bacteria;Proteobacteria;Betaproteobacteria;Burkholderiales;Oxalobacteraceae;Noviherbaspirillum;Noviherbaspirillum autotrophicum;Noviherbaspirillum autotrophicum TSA66	NA	NA	Ga0394449_02985	k141_3026	Noviherbaspirillum sp. BP10	2831285802	MEGAHIT-QMFCE002AF.10.fa
Ga0394449_02985_261708_263423	453.496	-14.4522	2.16564	-6.67341	2.49921e-11	1.2928e-10	DE	NA	NA	NA	NA	NA	NA	NA	NA	NA	NA	long-chain acyl-CoA synthetase	KO:K01897	Bacteria;Proteobacteria;Betaproteobacteria;Burkholderiales;Oxalobacteraceae;Noviherbaspirillum;Noviherbaspirillum autotrophicum;Noviherbaspirillum autotrophicum TSA66	EC:6.2.1.3	KO:K01897	Ga0394449_02985	k141_3026	Noviherbaspirillum sp. BP10	2831285802	MEGAHIT-QMFCE002AF.10.fa
Ga0394449_02985_263491_264255	49.0895	-11.3016	2.03199	-5.56183	2.66963e-08	9.58832e-08	DE	NA	NA	NA	NA	NA	NA	NA	NA	NA	NA	NAD(P)-dependent dehydrogenase (short-subunit alcohol dehydrogenase family)	COG1028	Bacteria;Proteobacteria;Betaproteobacteria;Burkholderiales;Oxalobacteraceae;Noviherbaspirillum;Noviherbaspirillum sp. Root189;Noviherbaspirillum sp. Root189	NA	NA	Ga0394449_02985	k141_3026	Noviherbaspirillum sp. BP10	2831285802	MEGAHIT-QMFCE002AF.10.fa
Ga0394449_02985_264340_265578	280.767	-13.6783	2.48341	-5.50787	3.63201e-08	1.28494e-07	DE	NA	NA	NA	NA	NA	NA	NA	NA	NA	NA	acyl-CoA dehydrogenase	KO:K00249	Bacteria;Proteobacteria;Betaproteobacteria;Burkholderiales;Oxalobacteraceae;Noviherbaspirillum;Noviherbaspirillum sp. Root189;Noviherbaspirillum sp. Root189	EC:1.3.8.7	KO:K00249	Ga0394449_02985	k141_3026	Noviherbaspirillum sp. BP10	2831285802	MEGAHIT-QMFCE002AF.10.fa
Ga0394449_02985_265696_266466	139.814	-12.864	1.87473	-6.86181	6.79946e-12	3.76784e-11	DE	NA	NA	NA	NA	NA	NA	NA	NA	NA	NA	NAD(P)-dependent dehydrogenase (short-subunit alcohol dehydrogenase family)	COG1028	Bacteria;Proteobacteria;Betaproteobacteria;Burkholderiales;Oxalobacteraceae;Noviherbaspirillum;Noviherbaspirillum denitrificans;Noviherbaspirillum denitrificans TSA40	NA	NA	Ga0394449_02985	k141_3026	Noviherbaspirillum sp. BP10	2831285802	MEGAHIT-QMFCE002AF.10.fa
Ga0394449_02985_266468_267175	59.7884	-11.2322	1.87864	-5.97892	2.24627e-09	9.04933e-09	DE	NA	NA	NA	NA	NA	NA	NA	NA	NA	NA	broad specificity phosphatase PhoE	COG0406	Bacteria;Proteobacteria;Betaproteobacteria;Burkholderiales;Oxalobacteraceae;Noviherbaspirillum;Noviherbaspirillum denitrificans;Noviherbaspirillum denitrificans TSA40	NA	NA	Ga0394449_02985	k141_3026	Noviherbaspirillum sp. BP10	2831285802	MEGAHIT-QMFCE002AF.10.fa
Ga0394449_02985_26665_27099	26.0041	-10.363	2.1098	-4.91183	9.02284e-07	2.71066e-06	DE	NA	NA	NA	NA	NA	NA	NA	NA	NA	NA	mono/diheme cytochrome c family protein	COG2010	Bacteria;Proteobacteria;Betaproteobacteria;Burkholderiales;Oxalobacteraceae;Noviherbaspirillum;Noviherbaspirillum autotrophicum;Noviherbaspirillum autotrophicum TSA66	NA	NA	Ga0394449_02985	k141_3026	Noviherbaspirillum sp. BP10	2831285802	MEGAHIT-QMFCE002AF.10.fa
Ga0394449_02985_267274_268176	82.1469	-9.84309	1.92783	-5.10579	3.2942e-07	1.04052e-06	DE	NA	NA	NA	NA	NA	NA	NA	NA	NA	NA	DNA-binding transcriptional LysR family regulator	COG0583	Bacteria;Proteobacteria;Betaproteobacteria;Burkholderiales;Oxalobacteraceae;Noviherbaspirillum;Noviherbaspirillum autotrophicum;Noviherbaspirillum autotrophicum TSA66	NA	NA	Ga0394449_02985	k141_3026	Noviherbaspirillum sp. BP10	2831285802	MEGAHIT-QMFCE002AF.10.fa
Ga0394449_02985_268179_269576	207.683	-13.2986	2.25847	-5.88832	3.90151e-09	1.5341e-08	DE	NA	NA	NA	NA	NA	NA	NA	NA	NA	NA	fumarate hydratase class II	KO:K01679	Bacteria;Proteobacteria;Betaproteobacteria;Burkholderiales;Oxalobacteraceae;Noviherbaspirillum;Noviherbaspirillum autotrophicum;Noviherbaspirillum autotrophicum TSA66	EC:4.2.1.2	KO:K01679	Ga0394449_02985	k141_3026	Noviherbaspirillum sp. BP10	2831285802	MEGAHIT-QMFCE002AF.10.fa
Ga0394449_02985_269752_273030	510.186	-11.0729	2.43956	-4.53887	5.65554e-06	1.55001e-05	DE	NA	NA	NA	NA	NA	NA	NA	NA	NA	NA	diguanylate cyclase (GGDEF)-like protein/PAS domain S-box-containing protein	TIGR00254/TIGR00229	Bacteria;Proteobacteria;Betaproteobacteria;Burkholderiales;Oxalobacteraceae;Noviherbaspirillum;Noviherbaspirillum denitrificans;Noviherbaspirillum denitrificans TSA40	NA	NA	Ga0394449_02985	k141_3026	Noviherbaspirillum sp. BP10	2831285802	MEGAHIT-QMFCE002AF.10.fa
Ga0394449_02985_27260_27943	274.693	-13.6292	2.56947	-5.30428	1.13122e-07	3.77763e-07	DE	NA	NA	NA	NA	NA	NA	NA	NA	NA	NA	hypothetical protein	Hypo-rule applied	Bacteria;Proteobacteria;Gammaproteobacteria;Oceanospirillales;Oceanospirillaceae;Marinobacterium;Marinobacterium mangrovicola;Marinobacterium mangrovicola DSM 27697	NA	NA	Ga0394449_02985	k141_3026	Noviherbaspirillum sp. BP10	2831285802	MEGAHIT-QMFCE002AF.10.fa
Ga0394449_02985_273261_274256	80.5863	-10.5581	2.07377	-5.09126	3.55685e-07	1.11804e-06	DE	NA	NA	NA	NA	NA	NA	NA	NA	NA	NA	uncharacterized protein YndB with AHSA1/START domain	COG3832	Bacteria;Proteobacteria;Betaproteobacteria;Burkholderiales;Oxalobacteraceae;Noviherbaspirillum;Noviherbaspirillum autotrophicum;Noviherbaspirillum autotrophicum TSA66	NA	NA	Ga0394449_02985	k141_3026	Noviherbaspirillum sp. BP10	2831285802	MEGAHIT-QMFCE002AF.10.fa
Ga0394449_02985_274343_274684	124.149	-8.673	2.18101	-3.97659	6.99098e-05	0.000168657	DE	NA	NA	NA	NA	NA	NA	NA	NA	NA	NA	hypothetical protein	Hypo-rule applied	Bacteria;Proteobacteria;Betaproteobacteria;Burkholderiales;Oxalobacteraceae;Noviherbaspirillum;Noviherbaspirillum denitrificans;Noviherbaspirillum denitrificans TSA40	NA	NA	Ga0394449_02985	k141_3026	Noviherbaspirillum sp. BP10	2831285802	MEGAHIT-QMFCE002AF.10.fa
Ga0394449_02985_275024_275980	295.453	-13.89	2.0046	-6.92908	4.23588e-12	2.4071e-11	DE	NA	NA	NA	NA	NA	NA	NA	NA	NA	NA	adenosylcobinamide-phosphate synthase	KO:K02227	Bacteria;Proteobacteria;Betaproteobacteria;Burkholderiales;Oxalobacteraceae;Noviherbaspirillum;Noviherbaspirillum denitrificans;Noviherbaspirillum denitrificans TSA40	EC:6.3.1.10	KO:K02227	Ga0394449_02985	k141_3026	Noviherbaspirillum sp. BP10	2831285802	MEGAHIT-QMFCE002AF.10.fa
Ga0394449_02985_276104_276775	205.045	-7.09378	2.86454	-2.47641	NA	NA	not_DE	NA	NA	NA	NA	NA	NA	NA	NA	NA	NA	8-oxo-dGTP pyrophosphatase MutT (NUDIX family)	COG0494	Bacteria;Proteobacteria;Betaproteobacteria;Burkholderiales;Oxalobacteraceae;Noviherbaspirillum;Noviherbaspirillum denitrificans;Noviherbaspirillum denitrificans TSA40	NA	NA	Ga0394449_02985	k141_3026	Noviherbaspirillum sp. BP10	2831285802	MEGAHIT-QMFCE002AF.10.fa
Ga0394449_02985_277387_278133	1610.21	-7.40108	1.59906	-4.62841	3.68484e-06	1.03071e-05	DE	NA	NA	NA	NA	NA	NA	NA	NA	NA	NA	tRNA (guanine37-N1)-methyltransferase	KO:K00554	Bacteria;Proteobacteria;Betaproteobacteria;Burkholderiales;Oxalobacteraceae;Noviherbaspirillum;Noviherbaspirillum sp. Root189;Noviherbaspirillum sp. Root189	EC:2.1.1.228	KO:K00554	Ga0394449_02985	k141_3026	Noviherbaspirillum sp. BP10	2831285802	MEGAHIT-QMFCE002AF.10.fa
Ga0394449_02985_278158_278685	1140.34	-7.63984	1.61337	-4.73533	2.18701e-06	6.28335e-06	DE	NA	NA	NA	NA	NA	NA	NA	NA	NA	NA	16S rRNA processing protein RimM	KO:K02860	Bacteria;Proteobacteria;Betaproteobacteria;Burkholderiales;Oxalobacteraceae;Noviherbaspirillum;Noviherbaspirillum humi;Noviherbaspirillum humi U15	NA	KO:K02860	Ga0394449_02985	k141_3026	Noviherbaspirillum sp. BP10	2831285802	MEGAHIT-QMFCE002AF.10.fa
Ga0394449_02985_279201_279551	18.4344	-4.15235	2.94507	-1.40993	0.15856	0.182993	not_DE	NA	NA	NA	NA	NA	NA	NA	NA	NA	NA	TM2 domain-containing membrane protein YozV	COG2314	Bacteria;Proteobacteria;Betaproteobacteria;Burkholderiales;Oxalobacteraceae;Noviherbaspirillum;Noviherbaspirillum denitrificans;Noviherbaspirillum denitrificans TSA40	NA	NA	Ga0394449_02985	k141_3026	Noviherbaspirillum sp. BP10	2831285802	MEGAHIT-QMFCE002AF.10.fa
Ga0394449_02985_279558_280316	156.778	-9.70109	2.14835	-4.5156	6.31387e-06	1.72127e-05	DE	NA	NA	NA	NA	NA	NA	NA	NA	NA	NA	predicted metal-binding membrane protein	COG5486	Bacteria;Cyanobacteria;unclassified Cyanobacteria;Nostocales;Chlorogloeopsidaceae;Chlorogloeopsis;Chlorogloeopsis fritschii;Chlorogloeopsis fritschii PCC 9212	NA	NA	Ga0394449_02985	k141_3026	Noviherbaspirillum sp. BP10	2831285802	MEGAHIT-QMFCE002AF.10.fa
Ga0394449_02985_280313_280939	94.4229	-12.2218	2.07229	-5.89772	3.68569e-09	1.45307e-08	DE	NA	NA	NA	NA	NA	NA	NA	NA	NA	NA	hypothetical protein	COG5588	Bacteria;Proteobacteria;Betaproteobacteria;Burkholderiales;Burkholderiaceae;Paraburkholderia;Paraburkholderia sp. BL10I2N1;Paraburkholderia sp. BL10I2N1	NA	NA	Ga0394449_02985	k141_3026	Noviherbaspirillum sp. BP10	2831285802	MEGAHIT-QMFCE002AF.10.fa
Ga0394449_02985_28053_28385	56.8926	-11.2992	2.95899	-3.81859	0.000134214	0.000309457	DE	NA	NA	NA	NA	NA	NA	NA	NA	NA	NA	hypothetical protein	Hypo-rule applied	NA	NA	NA	Ga0394449_02985	k141_3026	Noviherbaspirillum sp. BP10	2831285802	MEGAHIT-QMFCE002AF.10.fa
Ga0394449_02985_280964_281272	29.633	-10.5965	1.96995	-5.37905	7.48792e-08	2.54552e-07	DE	NA	NA	NA	NA	NA	NA	NA	NA	NA	NA	predicted small metal-binding protein	COG5466	Bacteria;Proteobacteria;Betaproteobacteria;Burkholderiales;Oxalobacteraceae;Noviherbaspirillum;Noviherbaspirillum autotrophicum;Noviherbaspirillum autotrophicum TSA66	NA	NA	Ga0394449_02985	k141_3026	Noviherbaspirillum sp. BP10	2831285802	MEGAHIT-QMFCE002AF.10.fa
Ga0394449_02985_281379_281816	522.706	-14.6631	2.14811	-6.82607	8.72731e-12	4.77588e-11	DE	NA	NA	NA	NA	NA	NA	NA	NA	NA	NA	hypothetical protein	Hypo-rule applied	Bacteria;Proteobacteria;Betaproteobacteria;Burkholderiales;Oxalobacteraceae;Noviherbaspirillum;Noviherbaspirillum autotrophicum;Noviherbaspirillum autotrophicum TSA66	NA	NA	Ga0394449_02985	k141_3026	Noviherbaspirillum sp. BP10	2831285802	MEGAHIT-QMFCE002AF.10.fa
Ga0394449_02985_281946_283739	1356.78	-11.735	1.94666	-6.02825	1.6574e-09	6.76826e-09	DE	NA	NA	NA	NA	NA	NA	NA	NA	0	0	butyryl-CoA dehydrogenase	KO:K00248	Bacteria;Proteobacteria;Betaproteobacteria;Burkholderiales;Oxalobacteraceae;Noviherbaspirillum;Noviherbaspirillum sp. Root189;Noviherbaspirillum sp. Root189	EC:1.3.8.1	KO:K00248	Ga0394449_02985	k141_3026	Noviherbaspirillum sp. BP10	2831285802	MEGAHIT-QMFCE002AF.10.fa
Ga0394449_02985_28395_28760	86.5285	-8.48793	2.90233	-2.92452	0.00344983	0.00636126	DE	NA	NA	NA	NA	NA	NA	NA	NA	NA	NA	glutaredoxin-related protein	COG0278	Bacteria;Proteobacteria;Betaproteobacteria;Burkholderiales;Oxalobacteraceae;Noviherbaspirillum;Noviherbaspirillum sp. Root189;Noviherbaspirillum sp. Root189	NA	NA	Ga0394449_02985	k141_3026	Noviherbaspirillum sp. BP10	2831285802	MEGAHIT-QMFCE002AF.10.fa
Ga0394449_02985_284843_285592	2011.59	-6.18987	1.70715	-3.62586	0.000288002	0.00062807	DE	NA	24.1223	NA	NA	NA	NA	NA	24.1223	0	3	electron transfer flavoprotein beta subunit	KO:K03521	Bacteria;Proteobacteria;Betaproteobacteria;Burkholderiales;Oxalobacteraceae;Noviherbaspirillum;Noviherbaspirillum massiliense;Noviherbaspirillum massiliense JC206	NA	KO:K03521	Ga0394449_02985	k141_3026	Noviherbaspirillum sp. BP10	2831285802	MEGAHIT-QMFCE002AF.10.fa
Ga0394449_02985_285644_285835	390.183	-14.0441	3.21105	-4.37366	1.22181e-05	3.22775e-05	DE	NA	NA	NA	NA	NA	NA	NA	NA	NA	NA	hypothetical protein	Hypo-rule applied	NA	NA	NA	Ga0394449_02985	k141_3026	Noviherbaspirillum sp. BP10	2831285802	MEGAHIT-QMFCE002AF.10.fa
Ga0394449_02985_285850_286077	155.533	-13.0023	1.90953	-6.80917	9.81658e-12	5.35039e-11	DE	NA	NA	NA	NA	NA	NA	NA	NA	NA	NA	tRNA 2-thiouridine synthesizing protein A	KO:K04085	Bacteria;Proteobacteria;Betaproteobacteria;Burkholderiales;Oxalobacteraceae;Noviherbaspirillum;Noviherbaspirillum denitrificans;Noviherbaspirillum denitrificans TSA40	EC:2.8.1.-	KO:K04085	Ga0394449_02985	k141_3026	Noviherbaspirillum sp. BP10	2831285802	MEGAHIT-QMFCE002AF.10.fa
Ga0394449_02985_286170_286670	78.2179	-11.9648	2.02826	-5.89905	3.65592e-09	1.44171e-08	DE	NA	NA	NA	NA	NA	NA	NA	NA	NA	NA	NADH pyrophosphatase NudC (nudix superfamily)	COG2816	Bacteria;Proteobacteria;Betaproteobacteria;Burkholderiales;Oxalobacteraceae;Noviherbaspirillum;Noviherbaspirillum sp. Root189;Noviherbaspirillum sp. Root189	NA	NA	Ga0394449_02985	k141_3026	Noviherbaspirillum sp. BP10	2831285802	MEGAHIT-QMFCE002AF.10.fa
Ga0394449_02985_286691_289312	438.307	-7.4558	1.29487	-5.75796	8.51357e-09	3.24093e-08	DE	NA	NA	NA	NA	NA	NA	NA	NA	0	0	alanyl-tRNA synthetase	KO:K01872	Bacteria;Proteobacteria;Betaproteobacteria;Burkholderiales;Oxalobacteraceae;Noviherbaspirillum;Noviherbaspirillum humi;Noviherbaspirillum humi U15	EC:6.1.1.7	KO:K01872	Ga0394449_02985	k141_3026	Noviherbaspirillum sp. BP10	2831285802	MEGAHIT-QMFCE002AF.10.fa
Ga0394449_02985_289459_290046	143.511	-10.1035	1.87437	-5.39033	7.03297e-08	2.3985e-07	DE	NA	NA	NA	NA	NA	NA	NA	NA	NA	NA	hypothetical protein	Hypo-rule applied	Bacteria;Proteobacteria;Betaproteobacteria;Burkholderiales;Oxalobacteraceae;Noviherbaspirillum;Noviherbaspirillum autotrophicum;Noviherbaspirillum autotrophicum TSA66	NA	NA	Ga0394449_02985	k141_3026	Noviherbaspirillum sp. BP10	2831285802	MEGAHIT-QMFCE002AF.10.fa
Ga0394449_02985_28975_30156	108.223	-8.16074	1.58242	-5.15711	2.50789e-07	8.03191e-07	DE	NA	NA	NA	NA	NA	NA	NA	NA	NA	NA	twitching motility protein PilU	KO:K02670	Bacteria;Proteobacteria;Betaproteobacteria;Burkholderiales;Oxalobacteraceae;Noviherbaspirillum;Noviherbaspirillum sp. Root189;Noviherbaspirillum sp. Root189	NA	KO:K02670	Ga0394449_02985	k141_3026	Noviherbaspirillum sp. BP10	2831285802	MEGAHIT-QMFCE002AF.10.fa
Ga0394449_02985_290163_290933	100.679	-12.2253	2.36031	-5.17953	2.22445e-07	7.17647e-07	DE	NA	NA	NA	NA	NA	NA	NA	NA	NA	NA	glycerophosphoryl diester phosphodiesterase	KO:K01126	Bacteria;Proteobacteria;Betaproteobacteria;Burkholderiales;Oxalobacteraceae;Noviherbaspirillum;Noviherbaspirillum sp. Root189;Noviherbaspirillum sp. Root189	EC:3.1.4.46	KO:K01126	Ga0394449_02985	k141_3026	Noviherbaspirillum sp. BP10	2831285802	MEGAHIT-QMFCE002AF.10.fa
Ga0394449_02985_291054_293657	645.085	-13.0456	1.80529	-7.22632	4.96251e-13	3.28648e-12	DE	NA	NA	NA	NA	NA	NA	NA	NA	NA	NA	diguanylate cyclase (GGDEF)-like protein/PAS domain S-box-containing protein	TIGR00254/TIGR00229	Bacteria;Proteobacteria;Betaproteobacteria;Burkholderiales;Oxalobacteraceae;Noviherbaspirillum;Noviherbaspirillum autotrophicum;Noviherbaspirillum autotrophicum TSA66	NA	NA	Ga0394449_02985	k141_3026	Noviherbaspirillum sp. BP10	2831285802	MEGAHIT-QMFCE002AF.10.fa
Ga0394449_02985_293639_294877	109.097	-10.8089	2.78613	-3.87952	0.000104663	0.000245799	DE	NA	NA	NA	NA	NA	NA	NA	NA	NA	NA	formyl-CoA transferase	KO:K07749	Bacteria;Proteobacteria;Betaproteobacteria;Burkholderiales;Oxalobacteraceae;Noviherbaspirillum;Noviherbaspirillum denitrificans;Noviherbaspirillum denitrificans TSA40	EC:2.8.3.16	KO:K07749	Ga0394449_02985	k141_3026	Noviherbaspirillum sp. BP10	2831285802	MEGAHIT-QMFCE002AF.10.fa
Ga0394449_02985_294932_296254	56.2247	-11.2507	3.17926	-3.53879	0.000401959	0.000855595	DE	NA	NA	NA	NA	NA	NA	NA	NA	NA	NA	predicted Zn-dependent protease	COG0312	Bacteria;Proteobacteria;Betaproteobacteria;Burkholderiales;Oxalobacteraceae;Noviherbaspirillum;Noviherbaspirillum autotrophicum;Noviherbaspirillum autotrophicum TSA66	NA	NA	Ga0394449_02985	k141_3026	Noviherbaspirillum sp. BP10	2831285802	MEGAHIT-QMFCE002AF.10.fa
Ga0394449_02985_296254_297690	271.128	-13.4975	3.4413	-3.92221	8.7739e-05	0.00020853	DE	NA	NA	NA	NA	NA	NA	NA	NA	NA	NA	predicted Zn-dependent protease	COG0312	Bacteria;Proteobacteria;Betaproteobacteria;Burkholderiales;Oxalobacteraceae;Noviherbaspirillum;Noviherbaspirillum massiliense;Noviherbaspirillum massiliense JC206	NA	NA	Ga0394449_02985	k141_3026	Noviherbaspirillum sp. BP10	2831285802	MEGAHIT-QMFCE002AF.10.fa
Ga0394449_02985_297936_299534	77.3133	-8.81993	2.04999	-4.30243	1.68931e-05	4.39745e-05	DE	NA	NA	NA	NA	NA	NA	NA	NA	NA	NA	gamma-glutamyltranspeptidase/glutathione hydrolase	KO:K00681	Bacteria;Proteobacteria;Betaproteobacteria;Burkholderiales;Oxalobacteraceae;Noviherbaspirillum;Noviherbaspirillum autotrophicum;Noviherbaspirillum autotrophicum TSA66	EC:2.3.2.2,EC:3.4.19.13	KO:K00681	Ga0394449_02985	k141_3026	Noviherbaspirillum sp. BP10	2831285802	MEGAHIT-QMFCE002AF.10.fa
Ga0394449_02985_299660_300040	14.0363	-9.27634	3.02099	-3.07063	0.0021361	0.00404522	DE	NA	NA	NA	NA	NA	NA	NA	NA	NA	NA	uncharacterized membrane protein	COG5395	Bacteria;Proteobacteria;Betaproteobacteria;Burkholderiales;Oxalobacteraceae;Noviherbaspirillum;Noviherbaspirillum sp. Root189;Noviherbaspirillum sp. Root189	NA	NA	Ga0394449_02985	k141_3026	Noviherbaspirillum sp. BP10	2831285802	MEGAHIT-QMFCE002AF.10.fa
Ga0394449_02985_300065_300334	294.479	-13.872	2.03916	-6.80283	1.02584e-11	5.58507e-11	DE	NA	NA	NA	NA	NA	NA	NA	NA	NA	NA	uncharacterized membrane protein	COG5488	Bacteria;Proteobacteria;Betaproteobacteria;Burkholderiales;Oxalobacteraceae;Noviherbaspirillum;Noviherbaspirillum sp. Root189;Noviherbaspirillum sp. Root189	NA	NA	Ga0394449_02985	k141_3026	Noviherbaspirillum sp. BP10	2831285802	MEGAHIT-QMFCE002AF.10.fa
Ga0394449_02985_300340_301416	304.923	-11.3276	1.76224	-6.42794	1.29348e-10	5.93998e-10	DE	NA	NA	NA	NA	NA	NA	NA	NA	NA	NA	signal transduction histidine kinase	COG0642	Bacteria;Proteobacteria;Betaproteobacteria;Burkholderiales;Oxalobacteraceae;Noviherbaspirillum;Noviherbaspirillum denitrificans;Noviherbaspirillum denitrificans TSA40	NA	NA	Ga0394449_02985	k141_3026	Noviherbaspirillum sp. BP10	2831285802	MEGAHIT-QMFCE002AF.10.fa
Ga0394449_02985_301413_302204	569.17	-14.7415	2.29868	-6.41302	1.4266e-10	6.53123e-10	DE	NA	NA	NA	NA	NA	NA	NA	NA	NA	NA	DNA-binding LytR/AlgR family response regulator	COG3279	Bacteria;Proteobacteria;Betaproteobacteria;Burkholderiales;Oxalobacteraceae;Noviherbaspirillum;Noviherbaspirillum denitrificans;Noviherbaspirillum denitrificans TSA40	NA	NA	Ga0394449_02985	k141_3026	Noviherbaspirillum sp. BP10	2831285802	MEGAHIT-QMFCE002AF.10.fa
Ga0394449_02985_302405_304471	447.904	-11.0756	1.89549	-5.84312	5.12309e-09	1.99396e-08	DE	NA	NA	NA	NA	NA	NA	NA	NA	NA	NA	methyl-accepting chemotaxis protein	COG0840	Bacteria;Proteobacteria;Betaproteobacteria;Burkholderiales;Oxalobacteraceae;Noviherbaspirillum;Noviherbaspirillum autotrophicum;Noviherbaspirillum autotrophicum TSA66	NA	NA	Ga0394449_02985	k141_3026	Noviherbaspirillum sp. BP10	2831285802	MEGAHIT-QMFCE002AF.10.fa
Ga0394449_02985_30293_30571	683.665	-15.1547	1.87426	-8.08566	6.18271e-16	5.73642e-15	DE	NA	NA	NA	NA	NA	NA	NA	NA	NA	NA	hypothetical protein	Hypo-rule applied	NA	NA	NA	Ga0394449_02985	k141_3026	Noviherbaspirillum sp. BP10	2831285802	MEGAHIT-QMFCE002AF.10.fa
Ga0394449_02985_304480_304899	104.663	-5.9758	2.28251	-2.61808	0.00884257	0.0151058	DE	NA	NA	NA	NA	NA	NA	NA	NA	NA	NA	hypothetical protein	Hypo-rule applied	Bacteria;Proteobacteria;Betaproteobacteria;Burkholderiales;Oxalobacteraceae;Noviherbaspirillum;Noviherbaspirillum denitrificans;Noviherbaspirillum denitrificans TSA40	NA	NA	Ga0394449_02985	k141_3026	Noviherbaspirillum sp. BP10	2831285802	MEGAHIT-QMFCE002AF.10.fa
Ga0394449_02985_305359_306438	100.493	-12.0944	3.14392	-3.84691	0.000119616	0.000278508	DE	NA	NA	NA	NA	NA	NA	NA	NA	NA	NA	MFS family permease	COG0477	Bacteria;Proteobacteria;Betaproteobacteria;Burkholderiales;Oxalobacteraceae;Noviherbaspirillum;Noviherbaspirillum sp. Root189;Noviherbaspirillum sp. Root189	NA	NA	Ga0394449_02985	k141_3026	Noviherbaspirillum sp. BP10	2831285802	MEGAHIT-QMFCE002AF.10.fa
Ga0394449_02985_30630_31052	203.75	-11.0866	1.74638	-6.34835	2.17631e-10	9.77768e-10	DE	NA	30.6977	NA	NA	NA	NA	30.6977	NA	3	0	ElaB/YqjD/DUF883 family membrane-anchored ribosome-binding protein	COG4575	Bacteria;Proteobacteria;Betaproteobacteria;Burkholderiales;Oxalobacteraceae;Noviherbaspirillum;Noviherbaspirillum sp. Root189;Noviherbaspirillum sp. Root189	NA	NA	Ga0394449_02985	k141_3026	Noviherbaspirillum sp. BP10	2831285802	MEGAHIT-QMFCE002AF.10.fa
Ga0394449_02985_306553_306975	34.838	-10.5081	3.86117	-2.72147	0.00649931	0.0114297	DE	NA	NA	NA	NA	NA	NA	NA	NA	NA	NA	uncharacterized protein (TIGR00369 family)	TIGR00369	Bacteria;Proteobacteria;Betaproteobacteria;Burkholderiales;Burkholderiaceae;Burkholderia;Burkholderia stabilis;Burkholderia stabilis ATCC BAA-67	NA	NA	Ga0394449_02985	k141_3026	Noviherbaspirillum sp. BP10	2831285802	MEGAHIT-QMFCE002AF.10.fa
Ga0394449_02985_307060_307446	25.0191	-10.1061	3.0172	-3.3495	0.000809561	0.00163312	DE	NA	NA	NA	NA	NA	NA	NA	NA	NA	NA	DNA-binding HxlR family transcriptional regulator	COG1733	Bacteria;Proteobacteria;Gammaproteobacteria;Oceanospirillales;Alcanivoracaceae;Alcanivorax;Alcanivorax sp. P2S70;Alcanivorax sp. P2S70	NA	NA	Ga0394449_02985	k141_3026	Noviherbaspirillum sp. BP10	2831285802	MEGAHIT-QMFCE002AF.10.fa
Ga0394449_02985_307549_309300	513.278	-6.64392	1.7116	-3.8817	0.000103728	0.000243679	DE	NA	NA	NA	NA	NA	NA	NA	NA	NA	NA	glutaminyl-tRNA synthetase	KO:K01886	Bacteria;Proteobacteria;Betaproteobacteria;Burkholderiales;Oxalobacteraceae;Noviherbaspirillum;Noviherbaspirillum autotrophicum;Noviherbaspirillum autotrophicum TSA66	EC:6.1.1.18	KO:K01886	Ga0394449_02985	k141_3026	Noviherbaspirillum sp. BP10	2831285802	MEGAHIT-QMFCE002AF.10.fa
Ga0394449_02985_309532_310068	998.273	-6.55464	2.14536	-3.05526	NA	NA	not_DE	NA	NA	NA	NA	NA	NA	NA	NA	NA	NA	hypothetical protein	Hypo-rule applied	Bacteria;Bacteroidetes;Cytophagia;Cytophagales;Hymenobacteraceae;Hymenobacter;Hymenobacter sp. PAMC 26628;Hymenobacter sp. PAMC 26628	NA	NA	Ga0394449_02985	k141_3026	Noviherbaspirillum sp. BP10	2831285802	MEGAHIT-QMFCE002AF.10.fa
Ga0394449_02985_310065_311159	3311.31	-5.51737	1.86703	-2.95516	0.00312509	0.00580113	DE	NA	NA	NA	NA	NA	NA	NA	NA	NA	NA	hypothetical protein	Hypo-rule applied	NA	NA	NA	Ga0394449_02985	k141_3026	Noviherbaspirillum sp. BP10	2831285802	MEGAHIT-QMFCE002AF.10.fa
Ga0394449_02985_311252_312157	1800.17	-5.87306	1.76016	-3.33666	0.000847928	0.00170384	DE	NA	NA	NA	NA	NA	NA	NA	NA	NA	NA	hypothetical protein	Hypo-rule applied	Bacteria;Proteobacteria;Gammaproteobacteria;Pseudomonadales;Pseudomonadaceae;Pseudomonas;unclassified Pseudomonas;Pseudomonas sp. LE6C9	NA	NA	Ga0394449_02985	k141_3026	Noviherbaspirillum sp. BP10	2831285802	MEGAHIT-QMFCE002AF.10.fa
Ga0394449_02985_31168_31536	1121.61	-15.8608	1.89179	-8.384	5.1159e-17	5.56234e-16	DE	NA	NA	NA	NA	NA	NA	NA	NA	NA	NA	uncharacterized membrane protein YqjE	COG5393	Bacteria;Proteobacteria;Betaproteobacteria;Burkholderiales;Oxalobacteraceae;Noviherbaspirillum;Noviherbaspirillum denitrificans;Noviherbaspirillum denitrificans TSA40	NA	NA	Ga0394449_02985	k141_3026	Noviherbaspirillum sp. BP10	2831285802	MEGAHIT-QMFCE002AF.10.fa
Ga0394449_02985_312445_312777	136.009	-10.3193	2.08	-4.9612	7.00578e-07	2.13388e-06	DE	NA	NA	NA	NA	NA	NA	NA	NA	NA	NA	quinol monooxygenase YgiN	COG1359	Bacteria;Gemmatimonadetes;Longimicrobia;Longimicrobiales;Longimicrobiaceae;Longimicrobium;Longimicrobium terrae;Longimicrobium terrae CECT 8660	NA	NA	Ga0394449_02985	k141_3026	Noviherbaspirillum sp. BP10	2831285802	MEGAHIT-QMFCE002AF.10.fa
Ga0394449_02985_312876_313337	27.2855	-10.2206	3.09209	-3.30541	0.000948376	0.00189017	DE	NA	NA	NA	NA	NA	NA	NA	NA	NA	NA	MerR family redox-sensitive transcriptional activator SoxR	KO:K13639	Bacteria;Proteobacteria;Alphaproteobacteria;Rhizobiales;Phyllobacteriaceae;Phyllobacterium;unclassified Phyllobacterium;Phyllobacterium sp. P30BS-XVII	NA	KO:K13639	Ga0394449_02985	k141_3026	Noviherbaspirillum sp. BP10	2831285802	MEGAHIT-QMFCE002AF.10.fa
Ga0394449_02985_313422_313838	60.9302	-11.5541	2.17229	-5.31883	1.04434e-07	3.50241e-07	DE	NA	NA	NA	NA	NA	NA	NA	NA	NA	NA	PhnB protein	KO:K04750	Bacteria;Proteobacteria;Betaproteobacteria;Burkholderiales;Comamonadaceae;Polaromonas;Polaromonas sp. C04;Polaromonas sp. C04	NA	KO:K04750	Ga0394449_02985	k141_3026	Noviherbaspirillum sp. BP10	2831285802	MEGAHIT-QMFCE002AF.10.fa
Ga0394449_02985_313902_314453	8.96138	-8.2496	3.52441	-2.3407	0.0192475	0.0298053	DE	NA	NA	NA	NA	NA	NA	NA	NA	NA	NA	hypothetical protein	COG3795	Bacteria;Proteobacteria;Deltaproteobacteria;Myxococcales;Myxococcaceae;Myxococcus;Myxococcus hansupus;Myxococcus hansupus DSM 436	NA	NA	Ga0394449_02985	k141_3026	Noviherbaspirillum sp. BP10	2831285802	MEGAHIT-QMFCE002AF.10.fa
Ga0394449_02985_314907_315185	79.0387	-11.7573	3.06606	-3.83464	0.000125747	0.000291418	DE	NA	NA	NA	NA	NA	NA	NA	NA	NA	NA	cytochrome c	KO:K08738	Bacteria;Proteobacteria;Betaproteobacteria;Burkholderiales;Oxalobacteraceae;Noviherbaspirillum;Noviherbaspirillum sp. Root189;Noviherbaspirillum sp. Root189	NA	KO:K08738	Ga0394449_02985	k141_3026	Noviherbaspirillum sp. BP10	2831285802	MEGAHIT-QMFCE002AF.10.fa
Ga0394449_02985_315295_315528	49.2207	-8.36263	2.84484	-2.93958	0.00328656	0.00608198	DE	NA	NA	NA	NA	NA	NA	NA	NA	NA	NA	putative transposase	KO:K07491	Bacteria;Proteobacteria;Deltaproteobacteria;Desulfobacterales;Desulfobacteraceae;Desulfoluna;Desulfoluna spongiiphila;Desulfoluna spongiiphila AA1	NA	KO:K07491	Ga0394449_02985	k141_3026	Noviherbaspirillum sp. BP10	2831285802	MEGAHIT-QMFCE002AF.10.fa
Ga0394449_02985_31533_31961	454.12	-14.4618	2.13882	-6.7616	1.3648e-11	7.31846e-11	DE	NA	24.6319	NA	NA	NA	NA	24.6319	NA	2	0	hypothetical protein	Hypo-rule applied	Bacteria;Proteobacteria;Betaproteobacteria;Burkholderiales;Oxalobacteraceae;Noviherbaspirillum;Noviherbaspirillum sp. Root189;Noviherbaspirillum sp. Root189	NA	NA	Ga0394449_02985	k141_3026	Noviherbaspirillum sp. BP10	2831285802	MEGAHIT-QMFCE002AF.10.fa
Ga0394449_02985_315767_316144	340.652	-13.8363	3.33046	-4.15447	3.26035e-05	8.22468e-05	DE	NA	NA	NA	NA	NA	NA	NA	NA	NA	NA	uncharacterized protein YuzE	COG5428	NA	NA	NA	Ga0394449_02985	k141_3026	Noviherbaspirillum sp. BP10	2831285802	MEGAHIT-QMFCE002AF.10.fa
Ga0394449_02985_316284_317735	101.407	-10.4474	2.10822	-4.95557	7.21178e-07	2.19216e-06	DE	NA	NA	NA	NA	NA	NA	NA	NA	NA	NA	thiol-disulfide isomerase/thioredoxin	COG0526	Bacteria;Proteobacteria;Betaproteobacteria;Burkholderiales;Burkholderiaceae;Chitinimonas;Chitinimonas taiwanensis;Chitinimonas taiwanensis DSM 18899	NA	NA	Ga0394449_02985	k141_3026	Noviherbaspirillum sp. BP10	2831285802	MEGAHIT-QMFCE002AF.10.fa
Ga0394449_02985_318161_318745	23.8129	-9.5597	1.98241	-4.82225	1.41949e-06	4.1623e-06	DE	NA	25.2775	NA	NA	NA	NA	25.2775	NA	3	0	hypothetical protein	Hypo-rule applied	Bacteria;Proteobacteria;Betaproteobacteria;Burkholderiales;Burkholderiaceae;Ralstonia;Ralstonia solanacearum;Ralstonia solanacearum UW25	NA	NA	Ga0394449_02985	k141_3026	Noviherbaspirillum sp. BP10	2831285802	MEGAHIT-QMFCE002AF.10.fa
Ga0394449_02985_319642_319785	108.624	-12.2105	3.11037	-3.92573	8.64669e-05	0.000205751	DE	NA	NA	NA	NA	NA	NA	NA	NA	NA	NA	hypothetical protein	Hypo-rule applied	Bacteria;Proteobacteria;Betaproteobacteria;Burkholderiales;Oxalobacteraceae;Noviherbaspirillum;Noviherbaspirillum autotrophicum;Noviherbaspirillum autotrophicum TSA66	NA	NA	Ga0394449_02985	k141_3026	Noviherbaspirillum sp. BP10	2831285802	MEGAHIT-QMFCE002AF.10.fa
Ga0394449_02985_31968_32180	159.242	-11.9669	2.65087	-4.51432	6.35208e-06	1.7298e-05	DE	NA	NA	NA	NA	NA	NA	NA	NA	NA	NA	predicted small secreted protein	COG5510	Bacteria;Proteobacteria;Betaproteobacteria;Burkholderiales;Oxalobacteraceae;Noviherbaspirillum;Noviherbaspirillum sp. Root189;Noviherbaspirillum sp. Root189	NA	NA	Ga0394449_02985	k141_3026	Noviherbaspirillum sp. BP10	2831285802	MEGAHIT-QMFCE002AF.10.fa
Ga0394449_02985_319842_320927	325.129	-6.84522	1.9685	-3.47737	0.000506351	0.00105834	DE	NA	NA	NA	NA	NA	NA	NA	NA	NA	NA	two-component system chemotaxis response regulator CheV	KO:K03415	Bacteria;Proteobacteria;Betaproteobacteria;Burkholderiales;Oxalobacteraceae;Herbaspirillum;Herbaspirillum hiltneri;Herbaspirillum hiltneri N3	NA	KO:K03415	Ga0394449_02985	k141_3026	Noviherbaspirillum sp. BP10	2831285802	MEGAHIT-QMFCE002AF.10.fa
Ga0394449_02985_320976_321407	116.897	-7.92164	2.4134	-3.28236	0.00102942	0.00204215	DE	NA	NA	NA	NA	NA	NA	NA	NA	NA	NA	ProP effector	KO:K03607	Bacteria;Proteobacteria;Betaproteobacteria;Burkholderiales;Oxalobacteraceae;Noviherbaspirillum;Noviherbaspirillum autotrophicum;Noviherbaspirillum autotrophicum TSA66	NA	KO:K03607	Ga0394449_02985	k141_3026	Noviherbaspirillum sp. BP10	2831285802	MEGAHIT-QMFCE002AF.10.fa
Ga0394449_02985_321537_321731	86.1521	-8.70771	2.89717	-3.00559	0.00265067	0.0049593	DE	NA	NA	NA	NA	NA	NA	NA	NA	NA	NA	F0F1-type ATP synthase assembly protein I	COG5336	Bacteria;Proteobacteria;Betaproteobacteria;Burkholderiales;Oxalobacteraceae;Noviherbaspirillum;Noviherbaspirillum autotrophicum;Noviherbaspirillum autotrophicum TSA66	NA	NA	Ga0394449_02985	k141_3026	Noviherbaspirillum sp. BP10	2831285802	MEGAHIT-QMFCE002AF.10.fa
Ga0394449_02985_321759_322667	16.2975	-9.64155	2.26141	-4.26351	2.0124e-05	5.19502e-05	DE	NA	NA	NA	NA	NA	NA	NA	NA	NA	NA	predicted deacylase	COG3608	Bacteria;Proteobacteria;Betaproteobacteria;Burkholderiales;Oxalobacteraceae;Noviherbaspirillum;Noviherbaspirillum autotrophicum;Noviherbaspirillum autotrophicum TSA66	NA	NA	Ga0394449_02985	k141_3026	Noviherbaspirillum sp. BP10	2831285802	MEGAHIT-QMFCE002AF.10.fa
Ga0394449_02985_32241_33428	88.2269	-11.924	3.00685	-3.96559	7.32138e-05	0.000176067	DE	NA	NA	NA	NA	NA	NA	NA	NA	NA	NA	predicted PurR-regulated permease PerM	COG0628	Bacteria;Proteobacteria;Betaproteobacteria;Burkholderiales;Oxalobacteraceae;Noviherbaspirillum;Noviherbaspirillum denitrificans;Noviherbaspirillum denitrificans TSA40	NA	NA	Ga0394449_02985	k141_3026	Noviherbaspirillum sp. BP10	2831285802	MEGAHIT-QMFCE002AF.10.fa
Ga0394449_02985_322881_323672	292.333	-13.6316	3.1723	-4.29709	1.73054e-05	4.49703e-05	DE	NA	NA	NA	NA	NA	NA	NA	NA	NA	NA	endoglucanase	KO:K01179	Bacteria;Proteobacteria;Betaproteobacteria;Neisseriales;Chromobacteriaceae;Chitiniphilus;Chitiniphilus shinanonensis;Chitiniphilus shinanonensis DSM 23277	EC:3.2.1.4	KO:K01179	Ga0394449_02985	k141_3026	Noviherbaspirillum sp. BP10	2831285802	MEGAHIT-QMFCE002AF.10.fa
Ga0394449_02985_323662_324057	63.7038	-27.5003	3.91077	-7.03192	2.03711e-12	1.23718e-11	DE	NA	NA	NA	NA	NA	NA	NA	NA	NA	NA	predicted nucleic acid-binding Zn-ribbon protein	COG3364	Bacteria;Proteobacteria;Deltaproteobacteria;Myxococcales;Polyangiaceae;Sorangium;Sorangium cellulosum;Sorangium cellulosum So0003-19-2	NA	NA	Ga0394449_02985	k141_3026	Noviherbaspirillum sp. BP10	2831285802	MEGAHIT-QMFCE002AF.10.fa
Ga0394449_02985_324675_325142	36.5747	-10.6686	2.94373	-3.62417	0.000289887	0.000631903	DE	NA	NA	NA	NA	NA	NA	NA	NA	NA	NA	hypothetical protein	Hypo-rule applied	Bacteria;Proteobacteria;Betaproteobacteria;Burkholderiales;Oxalobacteraceae;Noviherbaspirillum;Noviherbaspirillum sp. Root189;Noviherbaspirillum sp. Root189	NA	NA	Ga0394449_02985	k141_3026	Noviherbaspirillum sp. BP10	2831285802	MEGAHIT-QMFCE002AF.10.fa
Ga0394449_02985_325141_325638	29.8611	-10.2856	3.86241	-2.663	0.00774476	0.0133975	DE	NA	NA	NA	NA	NA	NA	NA	NA	NA	NA	AhpD family alkylhydroperoxidase	TIGR00778	Bacteria;Proteobacteria;Betaproteobacteria;Burkholderiales;Oxalobacteraceae;Noviherbaspirillum;Noviherbaspirillum autotrophicum;Noviherbaspirillum autotrophicum TSA66	NA	NA	Ga0394449_02985	k141_3026	Noviherbaspirillum sp. BP10	2831285802	MEGAHIT-QMFCE002AF.10.fa
Ga0394449_02985_325833_326603	64.5402	-11.4803	2.96799	-3.86805	0.00010971	0.000256924	DE	NA	NA	NA	NA	NA	NA	NA	NA	NA	NA	2-keto-4-pentenoate hydratase	COG3971	Bacteria;Proteobacteria;Betaproteobacteria;Burkholderiales;Oxalobacteraceae;Noviherbaspirillum;Noviherbaspirillum autotrophicum;Noviherbaspirillum autotrophicum TSA66	NA	NA	Ga0394449_02985	k141_3026	Noviherbaspirillum sp. BP10	2831285802	MEGAHIT-QMFCE002AF.10.fa
Ga0394449_02985_327107_327562	24.2881	-6.43633	2.25751	-2.85107	0.00435718	0.00790549	DE	NA	NA	NA	NA	NA	NA	NA	NA	NA	NA	signal transduction histidine kinase	COG4564	Bacteria;Proteobacteria;Betaproteobacteria;Burkholderiales;Oxalobacteraceae;unclassified Oxalobacteraceae;Oxalobacteraceae bacterium AB_14;Oxalobacteraceae bacterium AB_14	NA	NA	Ga0394449_02985	k141_3026	Noviherbaspirillum sp. BP10	2831285802	MEGAHIT-QMFCE002AF.10.fa
Ga0394449_02985_328307_330925	371.703	-14.1256	2.3036	-6.13196	8.68041e-10	3.64548e-09	DE	NA	NA	NA	NA	NA	NA	NA	NA	NA	NA	hypothetical protein	Hypo-rule applied	Bacteria;Proteobacteria;Deltaproteobacteria;Myxococcales;Archangiaceae;Cystobacter;Cystobacter fuscus;Cystobacter fuscus DSM 2262	NA	NA	Ga0394449_02985	k141_3026	Noviherbaspirillum sp. BP10	2831285802	MEGAHIT-QMFCE002AF.10.fa
Ga0394449_02985_330889_330999	89.5834	-28.0926	3.90962	-7.18552	NA	NA	not_DE	NA	NA	NA	NA	NA	NA	NA	NA	NA	NA	hypothetical protein	Hypo-rule applied	NA	NA	NA	Ga0394449_02985	k141_3026	Noviherbaspirillum sp. BP10	2831285802	MEGAHIT-QMFCE002AF.10.fa
Ga0394449_02985_331314_331868	277.535	-10.2767	2.01369	-5.10345	3.33521e-07	1.05191e-06	DE	NA	NA	NA	NA	NA	NA	NA	NA	NA	NA	hypothetical protein	Hypo-rule applied	Bacteria;Actinobacteria;Actinobacteria;Micrococcales;Intrasporangiaceae;Phycicoccus;Phycicoccus dokdonensis;Phycicoccus dokdonensis DSM 22329	NA	NA	Ga0394449_02985	k141_3026	Noviherbaspirillum sp. BP10	2831285802	MEGAHIT-QMFCE002AF.10.fa
Ga0394449_02985_331952_332233	176.625	-9.39993	1.95016	-4.82009	1.43493e-06	4.2018e-06	DE	NA	NA	NA	NA	NA	NA	NA	NA	NA	NA	Mn-dependent DtxR family transcriptional regulator	COG1321	Bacteria;Proteobacteria;Betaproteobacteria;Burkholderiales;Oxalobacteraceae;Noviherbaspirillum;Noviherbaspirillum denitrificans;Noviherbaspirillum denitrificans TSA40	NA	NA	Ga0394449_02985	k141_3026	Noviherbaspirillum sp. BP10	2831285802	MEGAHIT-QMFCE002AF.10.fa
Ga0394449_02985_332257_332946	239.741	-13.352	3.11507	-4.28625	1.81713e-05	4.70803e-05	DE	NA	NA	NA	NA	NA	NA	NA	NA	NA	NA	glutathione S-transferase	KO:K00799	Bacteria;Proteobacteria;Betaproteobacteria;Burkholderiales;Comamonadaceae;Curvibacter;Curvibacter lanceolatus;Curvibacter lanceolatus ATCC 14669	EC:2.5.1.18	KO:K00799	Ga0394449_02985	k141_3026	Noviherbaspirillum sp. BP10	2831285802	MEGAHIT-QMFCE002AF.10.fa
Ga0394449_02985_333079_333435	21.3374	-10.0585	2.12798	-4.72676	2.28129e-06	6.5341e-06	DE	NA	NA	NA	NA	NA	NA	NA	NA	NA	NA	FtsZ-binding cell division protein ZapB	COG3074	Bacteria;Proteobacteria;Betaproteobacteria;Nitrosomonadales;Gallionellaceae;Sulfuricella;Sulfuricella sp. T08;Sulfuricella sp. T08	NA	NA	Ga0394449_02985	k141_3026	Noviherbaspirillum sp. BP10	2831285802	MEGAHIT-QMFCE002AF.10.fa
Ga0394449_02985_333571_334824	49.9327	-11.1919	2.46224	-4.5454	5.48316e-06	1.50552e-05	DE	NA	NA	NA	NA	NA	NA	NA	NA	NA	NA	hypothetical chaperone protein	KO:K04046	Bacteria;Proteobacteria;Betaproteobacteria;Burkholderiales;Oxalobacteraceae;Janthinobacterium;Janthinobacterium lividum;Janthinobacterium lividum H-24, HB	NA	KO:K04046	Ga0394449_02985	k141_3026	Noviherbaspirillum sp. BP10	2831285802	MEGAHIT-QMFCE002AF.10.fa
Ga0394449_02985_33443_34264	24.0185	-10.1984	2.25921	-4.51414	6.3575e-06	1.73095e-05	DE	NA	24.7196	NA	NA	NA	NA	24.7196	NA	3	0	hypothetical protein	Hypo-rule applied	Bacteria;Proteobacteria;Betaproteobacteria;Burkholderiales;Oxalobacteraceae;Noviherbaspirillum;Noviherbaspirillum autotrophicum;Noviherbaspirillum autotrophicum TSA66	NA	NA	Ga0394449_02985	k141_3026	Noviherbaspirillum sp. BP10	2831285802	MEGAHIT-QMFCE002AF.10.fa
Ga0394449_02985_334905_335120	236.053	-10.7761	1.76015	-6.12228	9.2245e-10	3.86745e-09	DE	NA	NA	NA	NA	NA	NA	NA	NA	NA	NA	hypothetical protein	Hypo-rule applied	Bacteria;Proteobacteria;Betaproteobacteria;Burkholderiales;Oxalobacteraceae;Noviherbaspirillum;Noviherbaspirillum denitrificans;Noviherbaspirillum denitrificans TSA40	NA	NA	Ga0394449_02985	k141_3026	Noviherbaspirillum sp. BP10	2831285802	MEGAHIT-QMFCE002AF.10.fa
Ga0394449_02985_335372_336220	100.242	-12.3321	2.01476	-6.12088	9.30591e-10	3.89939e-09	DE	NA	NA	NA	NA	NA	NA	NA	NA	NA	NA	hypothetical protein	Hypo-rule applied	Bacteria;Proteobacteria;Betaproteobacteria;Rhodocyclales;Zoogloeaceae;Azoarcus;Azoarcus sp. KH32C;Azoarcus sp. KH32C	NA	NA	Ga0394449_02985	k141_3026	Noviherbaspirillum sp. BP10	2831285802	MEGAHIT-QMFCE002AF.10.fa
Ga0394449_02985_336682_336909	6.9676	-8.18394	3.89047	-2.10359	0.0354145	0.0496228	DE	NA	NA	NA	NA	NA	NA	NA	NA	NA	NA	hypothetical protein	Hypo-rule applied	Bacteria;Proteobacteria;Betaproteobacteria;Burkholderiales;Oxalobacteraceae;Noviherbaspirillum;Noviherbaspirillum autotrophicum;Noviherbaspirillum autotrophicum TSA66	NA	NA	Ga0394449_02985	k141_3026	Noviherbaspirillum sp. BP10	2831285802	MEGAHIT-QMFCE002AF.10.fa
Ga0394449_02985_336920_337123	280.695	-29.2652	3.90768	-7.48915	NA	NA	not_DE	NA	NA	NA	NA	NA	NA	NA	NA	NA	NA	hypothetical protein	Hypo-rule applied	NA	NA	NA	Ga0394449_02985	k141_3026	Noviherbaspirillum sp. BP10	2831285802	MEGAHIT-QMFCE002AF.10.fa
Ga0394449_02985_337297_337860	184.737	-13.281	1.84576	-7.19541	6.22751e-13	4.07723e-12	DE	NA	NA	NA	NA	NA	NA	NA	NA	NA	NA	hypothetical protein	Hypo-rule applied	Bacteria;Proteobacteria;Betaproteobacteria;Burkholderiales;Oxalobacteraceae;Noviherbaspirillum;Noviherbaspirillum autotrophicum;Noviherbaspirillum autotrophicum TSA66	NA	NA	Ga0394449_02985	k141_3026	Noviherbaspirillum sp. BP10	2831285802	MEGAHIT-QMFCE002AF.10.fa
Ga0394449_02985_338019_338468	357.219	-14.0788	2.2678	-6.20811	5.3627e-10	2.3093e-09	DE	NA	NA	NA	NA	NA	NA	NA	NA	0	0	general stress protein 26	COG3871	Bacteria;Proteobacteria;Betaproteobacteria;Burkholderiales;Oxalobacteraceae;Noviherbaspirillum;Noviherbaspirillum autotrophicum;Noviherbaspirillum autotrophicum TSA66	NA	NA	Ga0394449_02985	k141_3026	Noviherbaspirillum sp. BP10	2831285802	MEGAHIT-QMFCE002AF.10.fa
Ga0394449_02985_338579_338652	117.442	-12.3255	3.08997	-3.98887	6.63874e-05	0.000160529	DE	NA	NA	NA	NA	NA	NA	NA	NA	NA	NA	tRNA_Arg_ACG	tRNA	NA	NA	NA	Ga0394449_02985	k141_3026	Noviherbaspirillum sp. BP10	2831285802	MEGAHIT-QMFCE002AF.10.fa
Ga0394449_02985_338878_339342	176.193	-8.96345	2.443	-3.66904	0.000243467	0.000538418	DE	NA	NA	NA	NA	NA	NA	NA	NA	0	0	hypothetical protein	KO:K06893	Bacteria;Proteobacteria;Betaproteobacteria;Burkholderiales;Oxalobacteraceae;Massilia;Massilia eurypsychrophila;Massilia eurypsychrophila JCM 30074	NA	KO:K06893	Ga0394449_02985	k141_3026	Noviherbaspirillum sp. BP10	2831285802	MEGAHIT-QMFCE002AF.10.fa
Ga0394449_02985_3389_4399	316.54	-13.8975	2.29075	-6.06677	NA	NA	not_DE	NA	NA	NA	NA	NA	NA	NA	NA	NA	NA	AraC-like DNA-binding protein	COG2207	Bacteria;Proteobacteria;Betaproteobacteria;Burkholderiales;Oxalobacteraceae;Noviherbaspirillum;Noviherbaspirillum sp. Root189;Noviherbaspirillum sp. Root189	NA	NA	Ga0394449_02985	k141_3026	Noviherbaspirillum sp. BP10	2831285802	MEGAHIT-QMFCE002AF.10.fa
Ga0394449_02985_339441_340025	258.664	-13.6325	2.19523	-6.21006	5.29655e-10	2.28411e-09	DE	NA	NA	NA	NA	NA	NA	NA	NA	NA	NA	hypothetical protein	Hypo-rule applied	Bacteria;Proteobacteria;Betaproteobacteria;Burkholderiales;Oxalobacteraceae;Collimonas;Collimonas arenae;Collimonas arenae Ter282	NA	NA	Ga0394449_02985	k141_3026	Noviherbaspirillum sp. BP10	2831285802	MEGAHIT-QMFCE002AF.10.fa
Ga0394449_02985_340416_340943	138.357	-28.687	3.90861	-7.33942	NA	NA	not_DE	NA	NA	NA	NA	NA	NA	NA	NA	NA	NA	menaquinone-dependent protoporphyrinogen oxidase	KO:K00230	Bacteria;Proteobacteria;Gammaproteobacteria;Acidiferrobacterales;Acidiferrobacteraceae;Sulfuricaulis;Sulfuricaulis limicola;Sulfuricaulis limicola HA5	EC:1.3.5.3	KO:K00230	Ga0394449_02985	k141_3026	Noviherbaspirillum sp. BP10	2831285802	MEGAHIT-QMFCE002AF.10.fa
Ga0394449_02985_340970_341977	105.599	-12.2723	2.4661	-4.97638	6.47838e-07	1.9793e-06	DE	NA	NA	NA	NA	NA	NA	NA	NA	NA	NA	NAD(P)-dependent dehydrogenase (short-subunit alcohol dehydrogenase family)	COG1028	Bacteria;Proteobacteria;Betaproteobacteria;Burkholderiales;Burkholderiaceae;Paucimonas;Paucimonas lemoignei;Paucimonas lemoignei DSM 7445	NA	NA	Ga0394449_02985	k141_3026	Noviherbaspirillum sp. BP10	2831285802	MEGAHIT-QMFCE002AF.10.fa
Ga0394449_02985_342177_342329	138.285	-12.7718	2.06284	-6.19139	5.96352e-10	2.55257e-09	DE	NA	NA	NA	NA	NA	NA	NA	NA	NA	NA	uncharacterized protein YdaT	COG4876	Bacteria;Proteobacteria;Betaproteobacteria;Burkholderiales;Comamonadaceae;Polaromonas;Polaromonas sp. JS666;Polaromonas sp. JS666	NA	NA	Ga0394449_02985	k141_3026	Noviherbaspirillum sp. BP10	2831285802	MEGAHIT-QMFCE002AF.10.fa
Ga0394449_02985_342474_343607	137.76	-12.7546	2.10329	-6.06411	1.32686e-09	5.47538e-09	DE	NA	NA	NA	NA	NA	NA	NA	NA	NA	NA	ABC-type branched-subunit amino acid transport system substrate-binding protein	COG0683	Bacteria;Proteobacteria;Betaproteobacteria;Burkholderiales;Comamonadaceae;Comamonas;Comamonas granuli;Comamonas granuli NBRC 101663	NA	NA	Ga0394449_02985	k141_3026	Noviherbaspirillum sp. BP10	2831285802	MEGAHIT-QMFCE002AF.10.fa
Ga0394449_02985_343773_344357	32.4947	-10.4547	3.2314	-3.23535	0.00121492	0.00238292	DE	NA	NA	NA	NA	NA	NA	NA	NA	NA	NA	hypothetical protein	Hypo-rule applied	Bacteria;Proteobacteria;Betaproteobacteria;Rhodocyclales;Azonexaceae;Dechloromonas;Dechloromonas sp. JJ;Dechloromonas sp. JJ	NA	NA	Ga0394449_02985	k141_3026	Noviherbaspirillum sp. BP10	2831285802	MEGAHIT-QMFCE002AF.10.fa
Ga0394449_02985_344670_346154	224.083	-9.70294	2.79574	-3.47061	0.000519281	0.00108324	DE	NA	NA	NA	NA	NA	NA	NA	NA	NA	NA	diguanylate cyclase (GGDEF)-like protein/PAS domain S-box-containing protein	TIGR00254/TIGR00229	Bacteria;Proteobacteria;Betaproteobacteria;Burkholderiales;Oxalobacteraceae;Noviherbaspirillum;Noviherbaspirillum autotrophicum;Noviherbaspirillum autotrophicum TSA66	NA	NA	Ga0394449_02985	k141_3026	Noviherbaspirillum sp. BP10	2831285802	MEGAHIT-QMFCE002AF.10.fa
Ga0394449_02985_34595_35326	145.049	-12.7834	2.255	-5.6689	1.43713e-08	5.32956e-08	DE	NA	NA	NA	NA	NA	NA	NA	NA	NA	NA	hypothetical protein	Hypo-rule applied	Bacteria;Proteobacteria;Betaproteobacteria;Burkholderiales;Oxalobacteraceae;Noviherbaspirillum;Noviherbaspirillum autotrophicum;Noviherbaspirillum autotrophicum TSA66	NA	NA	Ga0394449_02985	k141_3026	Noviherbaspirillum sp. BP10	2831285802	MEGAHIT-QMFCE002AF.10.fa
Ga0394449_02985_346188_348734	189.922	-13.1913	2.1835	-6.04136	1.52817e-09	6.25765e-09	DE	NA	NA	NA	NA	NA	NA	NA	NA	NA	NA	penicillin-binding protein 1A	KO:K05366	Bacteria;Proteobacteria;Betaproteobacteria;Burkholderiales;Oxalobacteraceae;Noviherbaspirillum;Noviherbaspirillum autotrophicum;Noviherbaspirillum autotrophicum TSA66	EC:2.4.1.-,EC:3.4.-	KO:K05366	Ga0394449_02985	k141_3026	Noviherbaspirillum sp. BP10	2831285802	MEGAHIT-QMFCE002AF.10.fa
Ga0394449_02985_348812_348928	7.51367	-8.31946	3.40185	-2.44557	0.0144625	0.0233419	DE	NA	NA	NA	NA	NA	NA	NA	NA	NA	NA	hypothetical protein	Hypo-rule applied	NA	NA	NA	Ga0394449_02985	k141_3026	Noviherbaspirillum sp. BP10	2831285802	MEGAHIT-QMFCE002AF.10.fa
Ga0394449_02985_348933_349178	9.60465	-8.67616	3.87997	-2.23614	0.0253424	0.0375683	DE	NA	NA	NA	NA	NA	NA	NA	NA	NA	NA	hypothetical protein	Hypo-rule applied	Bacteria;Proteobacteria;Betaproteobacteria;Burkholderiales;Oxalobacteraceae;Noviherbaspirillum;Noviherbaspirillum sp. Root189;Noviherbaspirillum sp. Root189	NA	NA	Ga0394449_02985	k141_3026	Noviherbaspirillum sp. BP10	2831285802	MEGAHIT-QMFCE002AF.10.fa
Ga0394449_02985_349230_349340	93.8889	-12	3.09092	-3.88233	0.000103459	0.000243124	DE	NA	NA	NA	NA	NA	NA	NA	NA	NA	NA	hypothetical protein	Hypo-rule applied	Bacteria;Proteobacteria;Betaproteobacteria;Burkholderiales;Burkholderiaceae;Paraburkholderia;Paraburkholderia graminis;Paraburkholderia graminis C4D1M	NA	NA	Ga0394449_02985	k141_3026	Noviherbaspirillum sp. BP10	2831285802	MEGAHIT-QMFCE002AF.10.fa
Ga0394449_02985_349610_350488	94.044	-5.78159	2.64219	-2.18818	NA	NA	not_DE	NA	NA	NA	NA	NA	NA	NA	NA	NA	NA	RIO kinase 1	KO:K07178	Bacteria;Proteobacteria;Betaproteobacteria;Burkholderiales;Oxalobacteraceae;Noviherbaspirillum;Noviherbaspirillum autotrophicum;Noviherbaspirillum autotrophicum TSA66	EC:2.7.11.1	KO:K07178	Ga0394449_02985	k141_3026	Noviherbaspirillum sp. BP10	2831285802	MEGAHIT-QMFCE002AF.10.fa
Ga0394449_02985_350473_350898	35.2467	-10.7606	2.22036	-4.84636	1.25748e-06	3.70838e-06	DE	NA	NA	NA	NA	NA	NA	NA	NA	NA	NA	hypothetical protein	Hypo-rule applied	Bacteria;Proteobacteria;Betaproteobacteria;Burkholderiales;Oxalobacteraceae;Noviherbaspirillum;Noviherbaspirillum massiliense;Noviherbaspirillum massiliense JC206	NA	NA	Ga0394449_02985	k141_3026	Noviherbaspirillum sp. BP10	2831285802	MEGAHIT-QMFCE002AF.10.fa
Ga0394449_02985_350915_351670	54.1942	-11.2038	3.14355	-3.56404	0.000365191	0.000782462	DE	NA	NA	NA	NA	NA	NA	NA	NA	NA	NA	hypothetical protein	COG5429	Bacteria;Proteobacteria;Betaproteobacteria;Burkholderiales;Oxalobacteraceae;Noviherbaspirillum;Noviherbaspirillum denitrificans;Noviherbaspirillum denitrificans TSA40	NA	NA	Ga0394449_02985	k141_3026	Noviherbaspirillum sp. BP10	2831285802	MEGAHIT-QMFCE002AF.10.fa
Ga0394449_02985_351833_352903	68.1631	-11.5336	3.15133	-3.65992	0.000252294	0.000556867	DE	NA	NA	NA	NA	NA	NA	NA	NA	NA	NA	voltage-gated potassium channel	KO:K10716	Bacteria;Proteobacteria;Betaproteobacteria;Burkholderiales;Comamonadaceae;Curvibacter;Curvibacter lanceolatus;Curvibacter lanceolatus ATCC 14669	NA	KO:K10716	Ga0394449_02985	k141_3026	Noviherbaspirillum sp. BP10	2831285802	MEGAHIT-QMFCE002AF.10.fa
Ga0394449_02985_352989_353840	12.8336	-9.19459	2.63614	-3.48789	0.000486843	0.001021	DE	NA	NA	NA	NA	NA	NA	NA	NA	NA	NA	phosphatidylserine decarboxylase	KO:K01613	Bacteria;Proteobacteria;Betaproteobacteria;Burkholderiales;Oxalobacteraceae;Noviherbaspirillum;Noviherbaspirillum autotrophicum;Noviherbaspirillum autotrophicum TSA66	EC:4.1.1.65	KO:K01613	Ga0394449_02985	k141_3026	Noviherbaspirillum sp. BP10	2831285802	MEGAHIT-QMFCE002AF.10.fa
Ga0394449_02985_353921_354337	52.7577	-13.1918	3.60918	-3.65507	0.000257112	0.00056633	DE	NA	NA	NA	NA	NA	NA	NA	NA	NA	NA	secondary thiamine-phosphate synthase enzyme	TIGR00149	Bacteria;Proteobacteria;Betaproteobacteria;Burkholderiales;Burkholderiaceae;Paucimonas;Paucimonas lemoignei;Paucimonas lemoignei DSM 7445	NA	NA	Ga0394449_02985	k141_3026	Noviherbaspirillum sp. BP10	2831285802	MEGAHIT-QMFCE002AF.10.fa
Ga0394449_02985_35410_36792	170.231	-13.086	2.028	-6.45265	1.09911e-10	5.09123e-10	DE	NA	NA	NA	NA	NA	NA	NA	NA	NA	NA	glutathione synthase/RimK-type ligase-like ATP-grasp enzyme	COG0189	Bacteria;Proteobacteria;Betaproteobacteria;Burkholderiales;Oxalobacteraceae;Noviherbaspirillum;Noviherbaspirillum sp. Root189;Noviherbaspirillum sp. Root189	NA	NA	Ga0394449_02985	k141_3026	Noviherbaspirillum sp. BP10	2831285802	MEGAHIT-QMFCE002AF.10.fa
Ga0394449_02985_354502_354855	53.7501	-27.3876	3.91151	-7.00179	2.52719e-12	1.50303e-11	DE	NA	NA	NA	NA	NA	NA	NA	NA	NA	NA	hypothetical protein	Hypo-rule applied	Bacteria;Proteobacteria;Betaproteobacteria;Burkholderiales;Oxalobacteraceae;Noviherbaspirillum;Noviherbaspirillum denitrificans;Noviherbaspirillum denitrificans TSA40	NA	NA	Ga0394449_02985	k141_3026	Noviherbaspirillum sp. BP10	2831285802	MEGAHIT-QMFCE002AF.10.fa
Ga0394449_02985_354868_355671	21.6754	-8.25349	2.05276	-4.02067	5.80324e-05	0.000141426	DE	NA	NA	NA	NA	NA	NA	NA	NA	NA	NA	hypothetical protein	Hypo-rule applied	Bacteria;Proteobacteria;Betaproteobacteria;Burkholderiales;Oxalobacteraceae;Noviherbaspirillum;Noviherbaspirillum autotrophicum;Noviherbaspirillum autotrophicum TSA66	NA	NA	Ga0394449_02985	k141_3026	Noviherbaspirillum sp. BP10	2831285802	MEGAHIT-QMFCE002AF.10.fa
Ga0394449_02985_356064_356414	37.0128	-10.6512	3.26517	-3.26206	NA	NA	not_DE	NA	NA	NA	NA	NA	NA	NA	NA	NA	NA	hypothetical protein	Hypo-rule applied	NA	NA	NA	Ga0394449_02985	k141_3026	Noviherbaspirillum sp. BP10	2831285802	MEGAHIT-QMFCE002AF.10.fa
Ga0394449_02985_356553_357011	39.7423	-10.8394	2.57511	-4.2093	2.56164e-05	6.54164e-05	DE	NA	NA	NA	NA	NA	NA	NA	NA	NA	NA	transcriptional regulator with XRE-family HTH domain	COG1396	Bacteria;Proteobacteria;Betaproteobacteria;Burkholderiales;Oxalobacteraceae;Collimonas;Collimonas pratensis;Collimonas pratensis Ter91	NA	NA	Ga0394449_02985	k141_3026	Noviherbaspirillum sp. BP10	2831285802	MEGAHIT-QMFCE002AF.10.fa
Ga0394449_02985_357101_357346	85.2123	-8.97333	2.65801	-3.37595	0.000735607	0.00149506	DE	NA	NA	NA	NA	NA	NA	NA	NA	NA	NA	hypothetical protein	Hypo-rule applied	Bacteria;Proteobacteria;Betaproteobacteria;Burkholderiales;Oxalobacteraceae;Collimonas;Collimonas arenae;Collimonas arenae Cal35	NA	NA	Ga0394449_02985	k141_3026	Noviherbaspirillum sp. BP10	2831285802	MEGAHIT-QMFCE002AF.10.fa
Ga0394449_02985_357371_358165	272.757	-11.3184	2.24436	-5.04303	NA	NA	not_DE	NA	NA	NA	NA	NA	NA	NA	NA	NA	NA	hypothetical protein	Hypo-rule applied	Bacteria;Proteobacteria;Betaproteobacteria;Burkholderiales;Oxalobacteraceae;Noviherbaspirillum;Noviherbaspirillum sp. Root189;Noviherbaspirillum sp. Root189	NA	NA	Ga0394449_02985	k141_3026	Noviherbaspirillum sp. BP10	2831285802	MEGAHIT-QMFCE002AF.10.fa
Ga0394449_02985_358199_358639	172.436	-9.38774	2.30408	-4.07441	4.61314e-05	0.000113929	DE	NA	NA	NA	NA	NA	NA	NA	NA	NA	NA	hypothetical protein	Hypo-rule applied	Bacteria;Proteobacteria;Betaproteobacteria;Burkholderiales;Oxalobacteraceae;Noviherbaspirillum;Noviherbaspirillum autotrophicum;Noviherbaspirillum autotrophicum TSA66	NA	NA	Ga0394449_02985	k141_3026	Noviherbaspirillum sp. BP10	2831285802	MEGAHIT-QMFCE002AF.10.fa
Ga0394449_02985_358688_359890	205.953	-13.3079	2.1887	-6.08025	1.19992e-09	4.97216e-09	DE	NA	NA	NA	NA	NA	NA	NA	NA	NA	NA	hypothetical protein	Hypo-rule applied	Bacteria;Proteobacteria;Betaproteobacteria;Burkholderiales;Oxalobacteraceae;Noviherbaspirillum;Noviherbaspirillum autotrophicum;Noviherbaspirillum autotrophicum TSA66	NA	NA	Ga0394449_02985	k141_3026	Noviherbaspirillum sp. BP10	2831285802	MEGAHIT-QMFCE002AF.10.fa
Ga0394449_02985_360047_361954	386.883	-10.1006	2.1797	-4.63395	3.58752e-06	1.00464e-05	DE	NA	NA	NA	NA	NA	NA	NA	NA	NA	NA	diguanylate cyclase	KO:K13590	Bacteria;Proteobacteria;Betaproteobacteria;Burkholderiales;Burkholderiaceae;Paucimonas;Paucimonas lemoignei;Paucimonas lemoignei DSM 7445	NA	KO:K13590	Ga0394449_02985	k141_3026	Noviherbaspirillum sp. BP10	2831285802	MEGAHIT-QMFCE002AF.10.fa
Ga0394449_02985_362186_362482	238.115	-13.5084	2.21625	-6.09519	1.09306e-09	4.55079e-09	DE	NA	NA	NA	NA	NA	NA	NA	NA	NA	NA	cytochrome c-type biogenesis protein CcmH/NrfF	COG3088	NA	NA	NA	Ga0394449_02985	k141_3026	Noviherbaspirillum sp. BP10	2831285802	MEGAHIT-QMFCE002AF.10.fa
Ga0394449_02985_362802_363662	69.3606	-11.5698	3.05875	-3.78253	0.00015524	0.000354381	DE	NA	NA	NA	NA	NA	NA	NA	NA	NA	NA	HD-like signal output (HDOD) protein	COG1639	Bacteria;Proteobacteria;Betaproteobacteria;Burkholderiales;Oxalobacteraceae;Noviherbaspirillum;Noviherbaspirillum denitrificans;Noviherbaspirillum denitrificans TSA40	NA	NA	Ga0394449_02985	k141_3026	Noviherbaspirillum sp. BP10	2831285802	MEGAHIT-QMFCE002AF.10.fa
Ga0394449_02985_363714_364241	518.847	-10.4161	1.94525	-5.35464	8.57258e-08	2.89514e-07	DE	NA	NA	NA	NA	NA	NA	NA	NA	NA	NA	hypothetical protein	Hypo-rule applied	Bacteria;Proteobacteria;Betaproteobacteria;Burkholderiales;Oxalobacteraceae;Noviherbaspirillum;Noviherbaspirillum sp. Root189;Noviherbaspirillum sp. Root189	NA	NA	Ga0394449_02985	k141_3026	Noviherbaspirillum sp. BP10	2831285802	MEGAHIT-QMFCE002AF.10.fa
Ga0394449_02985_364291_364434	40.9742	-8.62507	2.17325	-3.96875	7.22517e-05	0.000173865	DE	NA	NA	NA	NA	NA	NA	NA	NA	NA	NA	hypothetical protein	Hypo-rule applied	NA	NA	NA	Ga0394449_02985	k141_3026	Noviherbaspirillum sp. BP10	2831285802	MEGAHIT-QMFCE002AF.10.fa
Ga0394449_02985_364789_365157	73.6575	-27.8153	3.91023	-7.11345	1.13174e-12	7.18294e-12	DE	NA	NA	NA	NA	NA	NA	NA	NA	NA	NA	hypothetical protein	Hypo-rule applied	Bacteria;Proteobacteria;Betaproteobacteria;Rhodocyclales;Zoogloeaceae;Azoarcus;Azoarcus olearius;Azoarcus olearius DQS4	NA	NA	Ga0394449_02985	k141_3026	Noviherbaspirillum sp. BP10	2831285802	MEGAHIT-QMFCE002AF.10.fa
Ga0394449_02985_365281_365454	39.3621	-10.8037	2.62363	-4.11785	3.82418e-05	9.55182e-05	DE	NA	NA	NA	NA	NA	NA	NA	NA	NA	NA	hypothetical protein	Hypo-rule applied	NA	NA	NA	Ga0394449_02985	k141_3026	Noviherbaspirillum sp. BP10	2831285802	MEGAHIT-QMFCE002AF.10.fa
Ga0394449_02985_365779_366834	131.234	-11.2954	1.72277	-6.55654	5.50689e-11	2.66666e-10	DE	NA	NA	NA	NA	NA	NA	NA	NA	NA	NA	hypothetical protein	Hypo-rule applied	Bacteria;Proteobacteria;Betaproteobacteria;Burkholderiales;Oxalobacteraceae;Noviherbaspirillum;Noviherbaspirillum autotrophicum;Noviherbaspirillum autotrophicum TSA66	NA	NA	Ga0394449_02985	k141_3026	Noviherbaspirillum sp. BP10	2831285802	MEGAHIT-QMFCE002AF.10.fa
Ga0394449_02985_366786_367994	371.762	-14.149	2.21786	-6.37957	1.7758e-10	8.04363e-10	DE	NA	NA	NA	NA	NA	NA	NA	NA	NA	NA	hypothetical protein	Hypo-rule applied	Bacteria;Proteobacteria;Betaproteobacteria;Burkholderiales;Oxalobacteraceae;Noviherbaspirillum;Noviherbaspirillum autotrophicum;Noviherbaspirillum autotrophicum TSA66	NA	NA	Ga0394449_02985	k141_3026	Noviherbaspirillum sp. BP10	2831285802	MEGAHIT-QMFCE002AF.10.fa
Ga0394449_02985_36789_38078	70.3508	-11.7039	2.39508	-4.88664	1.02569e-06	3.05741e-06	DE	NA	NA	NA	NA	NA	NA	NA	NA	NA	NA	gamma-glutamyl:cysteine ligase YbdK (ATP-grasp superfamily)	COG2170	Bacteria;Proteobacteria;Betaproteobacteria;Burkholderiales;Oxalobacteraceae;Noviherbaspirillum;Noviherbaspirillum sp. Root189;Noviherbaspirillum sp. Root189	NA	NA	Ga0394449_02985	k141_3026	Noviherbaspirillum sp. BP10	2831285802	MEGAHIT-QMFCE002AF.10.fa
Ga0394449_02985_368076_369212	673.417	-11.9154	2.13121	-5.59092	2.25865e-08	8.16923e-08	DE	NA	NA	NA	NA	NA	NA	NA	NA	NA	NA	hypothetical protein	Hypo-rule applied	Bacteria;Proteobacteria;Betaproteobacteria;Burkholderiales;Oxalobacteraceae;Noviherbaspirillum;Noviherbaspirillum sp. Root189;Noviherbaspirillum sp. Root189	NA	NA	Ga0394449_02985	k141_3026	Noviherbaspirillum sp. BP10	2831285802	MEGAHIT-QMFCE002AF.10.fa
Ga0394449_02985_369840_370103	386.764	-11.7217	1.73923	-6.73955	1.58875e-11	8.45557e-11	DE	NA	NA	NA	NA	NA	NA	NA	NA	NA	NA	translation initiation factor IF-1	KO:K02518	Bacteria;Proteobacteria;Betaproteobacteria;Burkholderiales;Oxalobacteraceae;Herbaspirillum;Herbaspirillum autotrophicum;Herbaspirillum autotrophicum IAM 14942	NA	KO:K02518	Ga0394449_02985	k141_3026	Noviherbaspirillum sp. BP10	2831285802	MEGAHIT-QMFCE002AF.10.fa
Ga0394449_02985_370435_370644	409.471	-7.99641	2.43039	-3.29018	0.00100124	0.00199023	DE	NA	NA	NA	NA	NA	NA	NA	NA	NA	NA	CspA family cold shock protein	KO:K03704	Bacteria;Proteobacteria;Betaproteobacteria;Burkholderiales;Oxalobacteraceae;Noviherbaspirillum;Noviherbaspirillum autotrophicum;Noviherbaspirillum autotrophicum TSA66	NA	KO:K03704	Ga0394449_02985	k141_3026	Noviherbaspirillum sp. BP10	2831285802	MEGAHIT-QMFCE002AF.10.fa
Ga0394449_02985_370848_371078	19.6258	-9.77751	2.94313	-3.32214	0.000893285	0.00178681	DE	NA	NA	NA	NA	NA	NA	NA	NA	0	0	hypothetical protein	Hypo-rule applied	Bacteria;Proteobacteria;Betaproteobacteria;Burkholderiales;Oxalobacteraceae;Herbaspirillum;Herbaspirillum autotrophicum;Herbaspirillum autotrophicum IAM 14942	NA	NA	Ga0394449_02985	k141_3026	Noviherbaspirillum sp. BP10	2831285802	MEGAHIT-QMFCE002AF.10.fa
Ga0394449_02985_371242_372069	299.048	-13.8632	2.1278	-6.51525	7.25692e-11	3.41446e-10	DE	NA	NA	NA	NA	NA	NA	NA	NA	NA	NA	hypothetical protein	Hypo-rule applied	Bacteria;Proteobacteria;Betaproteobacteria;Burkholderiales;Oxalobacteraceae;Noviherbaspirillum;Noviherbaspirillum autotrophicum;Noviherbaspirillum autotrophicum TSA66	NA	NA	Ga0394449_02985	k141_3026	Noviherbaspirillum sp. BP10	2831285802	MEGAHIT-QMFCE002AF.10.fa
Ga0394449_02985_372129_372506	136.399	-11.5525	3.69642	-3.12532	NA	NA	not_DE	NA	NA	NA	NA	NA	NA	NA	NA	NA	NA	hypothetical protein	Hypo-rule applied	Bacteria;Proteobacteria;Betaproteobacteria;Burkholderiales;Burkholderiaceae;Paucimonas;Paucimonas lemoignei;Paucimonas lemoignei DSM 7445	NA	NA	Ga0394449_02985	k141_3026	Noviherbaspirillum sp. BP10	2831285802	MEGAHIT-QMFCE002AF.10.fa
Ga0394449_02985_372772_374274	217.38	-9.47206	2.42317	-3.90895	9.26964e-05	0.00021963	DE	NA	NA	NA	NA	NA	NA	NA	NA	NA	NA	plasmid stabilization system protein ParE	COG3668	NA	NA	NA	Ga0394449_02985	k141_3026	Noviherbaspirillum sp. BP10	2831285802	MEGAHIT-QMFCE002AF.10.fa
Ga0394449_02985_374736_375971	76.3536	-9.27968	2.06681	-4.48986	7.12694e-06	1.9299e-05	DE	NA	NA	NA	NA	NA	NA	NA	NA	NA	NA	poly(hydroxyalkanoate) depolymerase family esterase	TIGR01840	Bacteria;Proteobacteria;Betaproteobacteria;Burkholderiales;Oxalobacteraceae;Noviherbaspirillum;Noviherbaspirillum massiliense;Noviherbaspirillum massiliense JC206	NA	NA	Ga0394449_02985	k141_3026	Noviherbaspirillum sp. BP10	2831285802	MEGAHIT-QMFCE002AF.10.fa
Ga0394449_02985_375984_376409	115.743	-7.72204	2.98319	-2.58852	0.00963897	0.0163485	DE	NA	NA	NA	NA	NA	NA	NA	NA	NA	NA	Arc/MetJ-type ribon-helix-helix transcriptional regulator	COG3609	Bacteria;Proteobacteria;Betaproteobacteria;Burkholderiales;Oxalobacteraceae;Noviherbaspirillum;Noviherbaspirillum denitrificans;Noviherbaspirillum denitrificans TSA40	NA	NA	Ga0394449_02985	k141_3026	Noviherbaspirillum sp. BP10	2831285802	MEGAHIT-QMFCE002AF.10.fa
Ga0394449_02985_376590_377486	52.4056	-11.1705	3.02252	-3.69575	0.000219242	0.000489046	DE	NA	NA	NA	NA	NA	NA	NA	NA	NA	NA	DNA-binding transcriptional LysR family regulator	COG0583	Bacteria;Proteobacteria;Betaproteobacteria;Burkholderiales;Oxalobacteraceae;Noviherbaspirillum;Noviherbaspirillum autotrophicum;Noviherbaspirillum autotrophicum TSA66	NA	NA	Ga0394449_02985	k141_3026	Noviherbaspirillum sp. BP10	2831285802	MEGAHIT-QMFCE002AF.10.fa
Ga0394449_02985_377583_378749	93.1277	-12.1697	2.17045	-5.60697	2.059e-08	7.47245e-08	DE	NA	NA	NA	NA	NA	NA	NA	NA	NA	NA	L-alanine-DL-glutamate epimerase-like enolase superfamily enzyme	COG4948	Bacteria;Proteobacteria;Betaproteobacteria;Burkholderiales;Oxalobacteraceae;Noviherbaspirillum;Noviherbaspirillum sp. Root189;Noviherbaspirillum sp. Root189	NA	NA	Ga0394449_02985	k141_3026	Noviherbaspirillum sp. BP10	2831285802	MEGAHIT-QMFCE002AF.10.fa
Ga0394449_02985_378902_380008	129.06	-12.6836	2.03185	-6.24238	4.30953e-10	1.87853e-09	DE	NA	NA	NA	NA	NA	NA	NA	NA	NA	NA	HlyD family secretion protein	KO:K01993	Bacteria;Proteobacteria;Betaproteobacteria;Nitrosomonadales;Thiobacillaceae;Annwoodia;Annwoodia aquaesulis;Annwoodia aquaesulis DSM 4255	NA	KO:K01993	Ga0394449_02985	k141_3026	Noviherbaspirillum sp. BP10	2831285802	MEGAHIT-QMFCE002AF.10.fa
Ga0394449_02985_379987_381774	85.888	-12.0021	2.35826	-5.08941	3.59186e-07	1.12833e-06	DE	NA	NA	NA	NA	NA	NA	NA	NA	NA	NA	ABC-2 type transport system ATP-binding protein	KO:K01990	Bacteria;Proteobacteria;Betaproteobacteria;Nitrosomonadales;Thiobacillaceae;Annwoodia;Annwoodia aquaesulis;Annwoodia aquaesulis DSM 4255	NA	KO:K01990	Ga0394449_02985	k141_3026	Noviherbaspirillum sp. BP10	2831285802	MEGAHIT-QMFCE002AF.10.fa
Ga0394449_02985_38152_38892	10.2821	-8.80869	3.08597	-2.85443	0.00431136	0.00783474	DE	NA	NA	NA	NA	NA	NA	NA	NA	NA	NA	predicted N-formylglutamate amidohydrolase	COG3931	Bacteria;Proteobacteria;Betaproteobacteria;Burkholderiales;Oxalobacteraceae;Noviherbaspirillum;Noviherbaspirillum autotrophicum;Noviherbaspirillum autotrophicum TSA66	NA	NA	Ga0394449_02985	k141_3026	Noviherbaspirillum sp. BP10	2831285802	MEGAHIT-QMFCE002AF.10.fa
Ga0394449_02985_381771_382925	162.628	-10.755	1.9953	-5.39015	7.04005e-08	2.40037e-07	DE	NA	NA	NA	NA	NA	NA	NA	NA	NA	NA	ABC-2 type transport system permease protein/ribosome-dependent ATPase	KO:K01992/KO:K13926	Bacteria;Proteobacteria;Betaproteobacteria;Burkholderiales;Oxalobacteraceae;Herbaspirillum;Herbaspirillum sp. RV1423;Herbaspirillum sp. RV1423	NA	KO:K01992,KO:K13926	Ga0394449_02985	k141_3026	Noviherbaspirillum sp. BP10	2831285802	MEGAHIT-QMFCE002AF.10.fa
Ga0394449_02985_382922_384106	74.5924	-11.961	1.87743	-6.37092	1.87903e-10	8.48548e-10	DE	NA	NA	NA	NA	NA	NA	NA	NA	NA	NA	ABC-2 type transport system permease protein	KO:K01992	Bacteria;Nitrospirae;Nitrospira;Nitrospirales;Nitrospiraceae;Nitrospira;Candidatus Nitrospira inopinata;Candidatus Nitrospira inopinata ENR4	NA	KO:K01992	Ga0394449_02985	k141_3026	Noviherbaspirillum sp. BP10	2831285802	MEGAHIT-QMFCE002AF.10.fa
Ga0394449_02985_384103_384318	20.9028	-9.77078	3.8661	-2.5273	0.0114945	0.0190647	DE	NA	NA	NA	NA	NA	NA	NA	NA	NA	NA	hypothetical protein	Hypo-rule applied	NA	NA	NA	Ga0394449_02985	k141_3026	Noviherbaspirillum sp. BP10	2831285802	MEGAHIT-QMFCE002AF.10.fa
Ga0394449_02985_384455_385579	177.457	-10.3676	1.9814	-5.23244	1.67288e-07	5.48108e-07	DE	NA	NA	NA	NA	NA	NA	NA	NA	NA	NA	HD-like signal output (HDOD) protein	COG1639	Bacteria;Proteobacteria;Betaproteobacteria;Burkholderiales;Oxalobacteraceae;Noviherbaspirillum;Noviherbaspirillum denitrificans;Noviherbaspirillum denitrificans TSA40	NA	NA	Ga0394449_02985	k141_3026	Noviherbaspirillum sp. BP10	2831285802	MEGAHIT-QMFCE002AF.10.fa
Ga0394449_02985_385766_386218	282.614	-13.8388	1.97556	-7.00499	2.47009e-12	1.472e-11	DE	NA	NA	NA	NA	NA	NA	NA	NA	NA	NA	hypothetical protein	Hypo-rule applied	Bacteria;Proteobacteria;Betaproteobacteria;Burkholderiales;Oxalobacteraceae;Noviherbaspirillum;Noviherbaspirillum autotrophicum;Noviherbaspirillum autotrophicum TSA66	NA	NA	Ga0394449_02985	k141_3026	Noviherbaspirillum sp. BP10	2831285802	MEGAHIT-QMFCE002AF.10.fa
Ga0394449_02985_386247_386498	446.416	-7.50202	2.45552	-3.05517	0.00224931	0.00424453	DE	NA	NA	NA	NA	NA	NA	NA	NA	NA	NA	hypothetical protein	Hypo-rule applied	Bacteria;Proteobacteria;Betaproteobacteria;Burkholderiales;Oxalobacteraceae;Noviherbaspirillum;Noviherbaspirillum massiliense;Noviherbaspirillum massiliense JC206	NA	NA	Ga0394449_02985	k141_3026	Noviherbaspirillum sp. BP10	2831285802	MEGAHIT-QMFCE002AF.10.fa
Ga0394449_02985_386787_387770	92.3708	-12.2232	1.9767	-6.18363	6.26429e-10	2.67747e-09	DE	NA	NA	NA	NA	NA	NA	NA	NA	NA	NA	hypothetical protein	KO:K07027	Bacteria;Proteobacteria;Betaproteobacteria;Burkholderiales;Oxalobacteraceae;Noviherbaspirillum;Noviherbaspirillum massiliense;Noviherbaspirillum massiliense JC206	NA	KO:K07027	Ga0394449_02985	k141_3026	Noviherbaspirillum sp. BP10	2831285802	MEGAHIT-QMFCE002AF.10.fa
Ga0394449_02985_387767_388999	49.8809	-11.1954	2.40755	-4.65011	3.31756e-06	9.3417e-06	DE	NA	NA	NA	NA	NA	NA	NA	NA	NA	NA	cardiolipin synthase	KO:K06131	Bacteria;Proteobacteria;Betaproteobacteria;Burkholderiales;Oxalobacteraceae;Noviherbaspirillum;Noviherbaspirillum denitrificans;Noviherbaspirillum denitrificans TSA40	EC:2.7.8.-	KO:K06131	Ga0394449_02985	k141_3026	Noviherbaspirillum sp. BP10	2831285802	MEGAHIT-QMFCE002AF.10.fa
Ga0394449_02985_389498_389683	5.52293	-7.86205	3.48442	-2.25634	0.0240491	0.0360483	DE	NA	NA	NA	NA	NA	NA	NA	NA	NA	NA	hypothetical protein	Hypo-rule applied	NA	NA	NA	Ga0394449_02985	k141_3026	Noviherbaspirillum sp. BP10	2831285802	MEGAHIT-QMFCE002AF.10.fa
Ga0394449_02985_389767_390093	425.168	-14.4817	1.84527	-7.84804	4.22604e-15	3.54162e-14	DE	NA	NA	NA	NA	NA	NA	NA	NA	NA	NA	O-antigen/teichoic acid export membrane protein	COG2244	NA	NA	NA	Ga0394449_02985	k141_3026	Noviherbaspirillum sp. BP10	2831285802	MEGAHIT-QMFCE002AF.10.fa
Ga0394449_02985_390297_391172	122.228	-12.6269	1.98326	-6.36675	1.93073e-10	8.70841e-10	DE	NA	NA	NA	NA	NA	NA	NA	NA	NA	NA	methyltransferase (TIGR00027 family)	TIGR00027	Bacteria;Proteobacteria;Gammaproteobacteria;Pseudomonadales;Pseudomonadaceae;Pseudomonas;Pseudomonas syringae;Pseudomonas syringae CC94	NA	NA	Ga0394449_02985	k141_3026	Noviherbaspirillum sp. BP10	2831285802	MEGAHIT-QMFCE002AF.10.fa
Ga0394449_02985_391188_391835	239.644	-11.9116	1.74495	-6.82634	8.711e-12	4.7687e-11	DE	NA	NA	NA	NA	NA	NA	NA	NA	NA	NA	predicted DsbA family dithiol-disulfide isomerase	COG2761	Bacteria;Proteobacteria;Gammaproteobacteria;Xanthomonadales;Nevskiaceae;Nevskia;Nevskia soli;Nevskia soli DSM 19509	NA	NA	Ga0394449_02985	k141_3026	Noviherbaspirillum sp. BP10	2831285802	MEGAHIT-QMFCE002AF.10.fa
Ga0394449_02985_391842_392195	146.421	-5.92891	1.75977	-3.36913	0.00075405	0.0015294	DE	NA	NA	NA	NA	NA	NA	NA	NA	0	0	hypothetical protein	Hypo-rule applied	Bacteria;Proteobacteria;Betaproteobacteria;Burkholderiales;Oxalobacteraceae;Noviherbaspirillum;Noviherbaspirillum autotrophicum;Noviherbaspirillum autotrophicum TSA66	NA	NA	Ga0394449_02985	k141_3026	Noviherbaspirillum sp. BP10	2831285802	MEGAHIT-QMFCE002AF.10.fa
Ga0394449_02985_392523_392912	22.4097	-9.95477	2.9756	-3.34546	0.000821457	0.00165488	DE	NA	NA	NA	NA	NA	NA	NA	NA	NA	NA	hypothetical protein	COG4747	Bacteria;Proteobacteria;Betaproteobacteria;Burkholderiales;Oxalobacteraceae;Noviherbaspirillum;Noviherbaspirillum denitrificans;Noviherbaspirillum denitrificans TSA40	NA	NA	Ga0394449_02985	k141_3026	Noviherbaspirillum sp. BP10	2831285802	MEGAHIT-QMFCE002AF.10.fa
Ga0394449_02985_392909_394018	140.906	-9.06612	2.80532	-3.23177	0.00123028	0.00241211	DE	NA	NA	NA	NA	NA	NA	NA	NA	NA	NA	histidine decarboxylase	KO:K01590	Bacteria;Proteobacteria;Betaproteobacteria;Burkholderiales;Oxalobacteraceae;Noviherbaspirillum;Noviherbaspirillum denitrificans;Noviherbaspirillum denitrificans TSA40	EC:4.1.1.22	KO:K01590	Ga0394449_02985	k141_3026	Noviherbaspirillum sp. BP10	2831285802	MEGAHIT-QMFCE002AF.10.fa
Ga0394449_02985_39305_41338	354.895	-10.5795	1.88466	-5.6135	1.98277e-08	7.20807e-08	DE	NA	NA	NA	NA	NA	NA	NA	NA	NA	NA	PAS domain S-box-containing protein	TIGR00229	Bacteria;Proteobacteria;Betaproteobacteria;Burkholderiales;Oxalobacteraceae;Herminiimonas;Herminiimonas sp. CN;Herminiimonas sp. CN	NA	NA	Ga0394449_02985	k141_3026	Noviherbaspirillum sp. BP10	2831285802	MEGAHIT-QMFCE002AF.10.fa
Ga0394449_02985_394201_394377	42.871	-11.119	2.00297	-5.55123	2.83663e-08	1.01686e-07	DE	NA	NA	NA	NA	NA	NA	NA	NA	NA	NA	hypothetical protein	Hypo-rule applied	NA	NA	NA	Ga0394449_02985	k141_3026	Noviherbaspirillum sp. BP10	2831285802	MEGAHIT-QMFCE002AF.10.fa
Ga0394449_02985_394593_397016	44.1913	-9.62869	2.74106	-3.51276	0.000443473	0.000936486	DE	NA	NA	NA	NA	NA	NA	NA	NA	NA	NA	RNA polymerase primary sigma factor	KO:K03086	Bacteria;Proteobacteria;Betaproteobacteria;Burkholderiales;Oxalobacteraceae;Noviherbaspirillum;Noviherbaspirillum autotrophicum;Noviherbaspirillum autotrophicum TSA66	NA	KO:K03086	Ga0394449_02985	k141_3026	Noviherbaspirillum sp. BP10	2831285802	MEGAHIT-QMFCE002AF.10.fa
Ga0394449_02985_397748_398068	2.40116	-6.74279	3.95106	-1.70658	0.0879005	0.107309	not_DE	NA	NA	NA	NA	NA	NA	NA	NA	0	0	hypothetical protein	Hypo-rule applied	Bacteria;Proteobacteria;Betaproteobacteria;Burkholderiales;Oxalobacteraceae;Noviherbaspirillum;Noviherbaspirillum autotrophicum;Noviherbaspirillum autotrophicum TSA66	NA	NA	Ga0394449_02985	k141_3026	Noviherbaspirillum sp. BP10	2831285802	MEGAHIT-QMFCE002AF.10.fa
Ga0394449_02985_398309_398644	182.698	-12.942	3.28587	-3.93867	8.19347e-05	0.000195653	DE	NA	NA	NA	NA	NA	NA	NA	NA	NA	NA	hypothetical protein	Hypo-rule applied	NA	NA	NA	Ga0394449_02985	k141_3026	Noviherbaspirillum sp. BP10	2831285802	MEGAHIT-QMFCE002AF.10.fa
Ga0394449_02985_398657_400015	111.768	-12.3914	2.31393	-5.35513	8.54936e-08	2.88795e-07	DE	NA	NA	NA	NA	NA	NA	NA	NA	NA	NA	triacylglycerol lipase	KO:K01046	Bacteria;Proteobacteria;Betaproteobacteria;Burkholderiales;Oxalobacteraceae;Noviherbaspirillum;Noviherbaspirillum autotrophicum;Noviherbaspirillum autotrophicum TSA66	EC:3.1.1.3	KO:K01046	Ga0394449_02985	k141_3026	Noviherbaspirillum sp. BP10	2831285802	MEGAHIT-QMFCE002AF.10.fa
Ga0394449_02985_400131_400694	8.306	-8.47753	3.36361	-2.52037	0.0117233	0.0194054	DE	NA	NA	NA	NA	NA	NA	NA	NA	NA	NA	hypothetical protein	Hypo-rule applied	Bacteria;Proteobacteria;Betaproteobacteria;Burkholderiales;Oxalobacteraceae;Noviherbaspirillum;Noviherbaspirillum autotrophicum;Noviherbaspirillum autotrophicum TSA66	NA	NA	Ga0394449_02985	k141_3026	Noviherbaspirillum sp. BP10	2831285802	MEGAHIT-QMFCE002AF.10.fa
Ga0394449_02985_400688_401311	69.549	-8.01039	2.68561	-2.98271	0.00285706	0.00532875	DE	NA	NA	NA	NA	NA	NA	NA	NA	NA	NA	hypothetical protein	Hypo-rule applied	Bacteria;Proteobacteria;Betaproteobacteria;Burkholderiales;Oxalobacteraceae;Noviherbaspirillum;Noviherbaspirillum denitrificans;Noviherbaspirillum denitrificans TSA40	NA	NA	Ga0394449_02985	k141_3026	Noviherbaspirillum sp. BP10	2831285802	MEGAHIT-QMFCE002AF.10.fa
Ga0394449_02985_401816_402703	213.158	-10.7174	1.79485	-5.97121	2.35505e-09	9.46456e-09	DE	NA	NA	NA	NA	NA	NA	NA	NA	NA	NA	sensor domain CHASE-containing protein	COG3452	Bacteria;Proteobacteria;Betaproteobacteria;Burkholderiales;Oxalobacteraceae;Noviherbaspirillum;Noviherbaspirillum autotrophicum;Noviherbaspirillum autotrophicum TSA66	NA	NA	Ga0394449_02985	k141_3026	Noviherbaspirillum sp. BP10	2831285802	MEGAHIT-QMFCE002AF.10.fa
Ga0394449_02985_402825_403004	144.111	-10.2862	3.06515	-3.35584	NA	NA	not_DE	NA	NA	NA	NA	NA	NA	NA	NA	NA	NA	hypothetical protein	Hypo-rule applied	NA	NA	NA	Ga0394449_02985	k141_3026	Noviherbaspirillum sp. BP10	2831285802	MEGAHIT-QMFCE002AF.10.fa
Ga0394449_02985_403016_403900	164.282	-6.60922	2.0311	-3.25401	NA	NA	not_DE	NA	NA	NA	NA	NA	NA	NA	NA	NA	NA	SAM-dependent methyltransferase	COG0500	Bacteria;Proteobacteria;Betaproteobacteria;Burkholderiales;Oxalobacteraceae;Noviherbaspirillum;Noviherbaspirillum denitrificans;Noviherbaspirillum denitrificans TSA40	NA	NA	Ga0394449_02985	k141_3026	Noviherbaspirillum sp. BP10	2831285802	MEGAHIT-QMFCE002AF.10.fa
Ga0394449_02985_404004_404516	136.506	-8.27619	1.99392	-4.15072	3.31431e-05	8.35374e-05	DE	NA	NA	NA	NA	NA	NA	NA	NA	NA	NA	hypothetical protein	KO:K09983	Bacteria;Proteobacteria;Gammaproteobacteria;Pseudomonadales;Pseudomonadaceae;Pseudomonas;Pseudomonas sp. M47T1;Pseudomonas sp. M47T1	NA	KO:K09983	Ga0394449_02985	k141_3026	Noviherbaspirillum sp. BP10	2831285802	MEGAHIT-QMFCE002AF.10.fa
Ga0394449_02985_405941_406621	66.2735	-11.6773	2.20342	-5.29962	1.16045e-07	3.86835e-07	DE	NA	NA	NA	NA	NA	NA	NA	NA	NA	NA	carboxymethylenebutenolidase	KO:K01061	Bacteria;Proteobacteria;Betaproteobacteria;Burkholderiales;Oxalobacteraceae;Noviherbaspirillum;Noviherbaspirillum denitrificans;Noviherbaspirillum denitrificans TSA40	EC:3.1.1.45	KO:K01061	Ga0394449_02985	k141_3026	Noviherbaspirillum sp. BP10	2831285802	MEGAHIT-QMFCE002AF.10.fa
Ga0394449_02985_406713_406973	223.778	-13.239	3.24076	-4.08514	4.40502e-05	0.000109113	DE	NA	NA	NA	NA	NA	NA	NA	NA	NA	NA	uncharacterized membrane protein YeaQ/YmgE (transglycosylase-associated protein family)	COG2261	Bacteria;Proteobacteria;Betaproteobacteria;Burkholderiales;Oxalobacteraceae;Noviherbaspirillum;Noviherbaspirillum sp. Root189;Noviherbaspirillum sp. Root189	NA	NA	Ga0394449_02985	k141_3026	Noviherbaspirillum sp. BP10	2831285802	MEGAHIT-QMFCE002AF.10.fa
Ga0394449_02985_407105_408262	639.849	-11.4983	1.92629	-5.96915	2.38488e-09	9.57927e-09	DE	NA	NA	NA	NA	NA	NA	NA	NA	NA	NA	predicted ATP-grasp superfamily ATP-dependent carboligase	COG3919	Bacteria;Proteobacteria;Betaproteobacteria;Burkholderiales;Oxalobacteraceae;Noviherbaspirillum;Noviherbaspirillum autotrophicum;Noviherbaspirillum autotrophicum TSA66	NA	NA	Ga0394449_02985	k141_3026	Noviherbaspirillum sp. BP10	2831285802	MEGAHIT-QMFCE002AF.10.fa
Ga0394449_02985_408570_409421	96.5485	-10.8238	1.98706	-5.44715	5.11833e-08	1.78467e-07	DE	NA	NA	NA	NA	NA	NA	NA	NA	NA	NA	sugar lactone lactonase YvrE	COG3386	Bacteria;Proteobacteria;Betaproteobacteria;Burkholderiales;Oxalobacteraceae;Noviherbaspirillum;Noviherbaspirillum sp. Root189;Noviherbaspirillum sp. Root189	NA	NA	Ga0394449_02985	k141_3026	Noviherbaspirillum sp. BP10	2831285802	MEGAHIT-QMFCE002AF.10.fa
Ga0394449_02985_409441_409758	1.02907	-5.84299	3.99101	-1.46404	0.143184	NA	not_DE	NA	NA	NA	NA	NA	NA	NA	NA	NA	NA	hypothetical protein	Hypo-rule applied	NA	NA	NA	Ga0394449_02985	k141_3026	Noviherbaspirillum sp. BP10	2831285802	MEGAHIT-QMFCE002AF.10.fa
Ga0394449_02985_409758_410915	47.0521	-11.0152	3.02189	-3.64514	0.00026725	0.000587101	DE	NA	NA	NA	NA	NA	NA	NA	NA	NA	NA	AraC-like DNA-binding protein	COG2207	Bacteria;Proteobacteria;Betaproteobacteria;Burkholderiales;Oxalobacteraceae;Noviherbaspirillum;Noviherbaspirillum denitrificans;Noviherbaspirillum denitrificans TSA40	NA	NA	Ga0394449_02985	k141_3026	Noviherbaspirillum sp. BP10	2831285802	MEGAHIT-QMFCE002AF.10.fa
Ga0394449_02985_411008_411544	106.211	-12.3746	2.10867	-5.86843	4.39938e-09	1.7208e-08	DE	NA	NA	NA	NA	NA	NA	NA	NA	NA	NA	hypothetical protein	KO:K09924	Bacteria;Proteobacteria;Betaproteobacteria;Burkholderiales;Oxalobacteraceae;Noviherbaspirillum;Noviherbaspirillum denitrificans;Noviherbaspirillum denitrificans TSA40	NA	KO:K09924	Ga0394449_02985	k141_3026	Noviherbaspirillum sp. BP10	2831285802	MEGAHIT-QMFCE002AF.10.fa
Ga0394449_02985_411587_413170	321.074	-14.0489	1.90874	-7.36033	1.8346e-13	1.28147e-12	DE	NA	NA	NA	NA	NA	NA	NA	NA	NA	NA	long-subunit fatty acid transport protein	COG2067	Bacteria;Proteobacteria;Betaproteobacteria;Burkholderiales;Oxalobacteraceae;Noviherbaspirillum;Noviherbaspirillum denitrificans;Noviherbaspirillum denitrificans TSA40	NA	NA	Ga0394449_02985	k141_3026	Noviherbaspirillum sp. BP10	2831285802	MEGAHIT-QMFCE002AF.10.fa
Ga0394449_02985_413229_414248	324.513	-13.9578	2.20443	-6.33171	2.42462e-10	1.08378e-09	DE	NA	NA	NA	NA	NA	NA	NA	NA	0	0	hypothetical protein	Hypo-rule applied	Bacteria;Proteobacteria;Betaproteobacteria;Burkholderiales;Oxalobacteraceae;Noviherbaspirillum;Noviherbaspirillum massiliense;Noviherbaspirillum massiliense JC206	NA	NA	Ga0394449_02985	k141_3026	Noviherbaspirillum sp. BP10	2831285802	MEGAHIT-QMFCE002AF.10.fa
Ga0394449_02985_41347_41964	340.08	-11.7008	1.70214	-6.87421	6.23363e-12	3.47103e-11	DE	NA	NA	NA	NA	NA	NA	NA	NA	NA	NA	DNA-binding NarL/FixJ family response regulator	COG2197	Bacteria;Proteobacteria;Betaproteobacteria;Burkholderiales;Oxalobacteraceae;Noviherbaspirillum;Noviherbaspirillum humi;Noviherbaspirillum humi U15	NA	NA	Ga0394449_02985	k141_3026	Noviherbaspirillum sp. BP10	2831285802	MEGAHIT-QMFCE002AF.10.fa
[truncated: 16,818 more rows]
